# Supplementary material for: 1-D-ice flow modelling at EPICA Dome C and Dome Fuji, East Antarctica
Source: Copernicus journal article supplement (doi:10.5194/cp-3-243-2007), 2007-06-01
Supplement: Supplementary file 1 [file sp1.xls]

## Sheet: main
F. Parrenin, May, 11, 2007.
The EDC3 time scale for EDC and corresponding accumulation and thinning.
column 1:	Bag number. It refers to the EDC96 bag numbers above 789 m depth and to the EDC99 bag numbers below 789 m depth.
column 2:	Official logging depth for the top of the bag. It refers to the EDC96 depths above 789 m depth and to the EDC99 depths below 789 m depth.
column 3:	Equivalent EDC99 depth for the top 789 m.
column 4:	EDC3 time scale for the ice in yr before 1950 AD (b1950).
column 5:	Surface temperature (in Kelvin) when snow deposited.
column 6:	Surface accumulation rate when snow deposited, as used to compute EDC3, in cm of ice-equivalent per year (cm-ie/yr).
column 7:	Total thinning of ice (or thinning function).
Note: There is a small 60 years compression in the EDC99 age scale at the transition from EDC96 to EDC99.
If you are looking in details at this depth, we recommend adding 60 years to the EDC99 ages below 789 m depth.
#bagEDC96+99	logdepthtop-EDC96+99	logdepthtop-EDC99	ageEDC3-top-b1950	temp	acc-EDC3	thin-mid
1	0		-50	218.4	3.099	1.00014
2	0.55		-43.5477	218.4	3.09946	1.00006
3	1.1		-37.4183	218.4	3.09979	0.999985
4	1.65		-31.6115	218.4	3.09994	0.999915
5	2.2		-24.5139	218.4	3.09983	0.999829
6	2.75		-17.7378	218.4	3.09934	0.999747
7	3.3		-10.9595	218.4	3.09838	0.999664
8	3.85		-3.20879	218.4	3.10958	0.99957
9	4.4		5.48176	218.4	3.11352	0.999468
10	4.95		13.5204	218.4	3.10956	0.999368
11	5.5		22.2163	218.4	3.1039	0.999261
12	6.05		30.6081	218.4	3.09693	0.999163
13	6.6		38.3738	218.4	3.08906	0.999066
14	7.15		46.812	219.4	3.0406	0.999143
15	7.7		55.0562	220.6	3.00189	0.999044
16	8.25		64.4151	217.9	2.98708	0.998936
17	8.8		73.1508	217.1	2.97181	0.998833
18	9.35		81.9324	217.6	2.95661	0.998733
19	9.9		90.7593	217.6	2.94218	0.998632
20	10.45		99.9703	217	2.7317	0.998527
21	11		109.889	218.3	2.67621	0.99842
22	11.55		119.259	217	2.66874	0.998321
23	12.1		129.404	216.4	2.66365	0.998217
24	12.65	12.46	139.939	217.9	2.66183	0.998108
25	13.2	13.01	150.102	217.1	2.67666	0.998142
26	13.75	13.56	160.58	218.6	2.68644	0.998034
27	14.3	14.11	171.018	217.8	2.68919	0.997925
28	14.85	14.66	181.445	216.8	2.6932	0.997817
29	15.4	15.21	191.483	216.3	2.69818	0.997709
30	15.95	15.76	201.872	218.1	2.71771	0.997601
31	16.5	16.31	212.186	215.1	2.73554	0.99749
32	17.05	16.86	223.163	218	2.7445	0.997376
33	17.6	17.41	233.739	218.4	2.75409	0.997261
34	18.15	17.96	244.641	218.3	2.76487	0.997144
35	18.7	18.51	255.5	217.5	2.70166	0.997136
36	19.25	19.06	266.612	217.4	2.6905	0.997018
37	19.8	19.61	277.771	216.1	2.70252	0.996901
38	20.35	20.16	289.25	217.2	2.71542	0.996779
39	20.9	20.71	301.043	217.7	2.72198	0.996657
40	21.45	21.26	312.442	216.3	2.71899	0.996535
41	22	21.81	323.855	217.1	2.7324	0.996412
42	22.55	22.36	335.578	217	2.7462	0.996289
43	23.1	22.91	346.881	217.6	2.75622	0.996165
44	23.65	23.46	358.508	216.9	2.66737	0.996136
45	24.2	24.01	370.901	216.6	2.67857	0.99601
46	24.75	24.56	382.874	216	2.6877	0.995883
47	25.3	25.11	395.186	217.1	2.69608	0.995755
48	25.85	25.66	407.466	217.4	2.84577	0.995628
49	26.4	26.21	418.755	217.8	2.84759	0.9955
50	26.95	26.76	430.398	215.8	2.8461	0.995371
51	27.5	27.31	442.409	217.7	2.84069	0.99524
52	28.05	27.86	454.099	217.7	2.84742	0.995232
53	28.6	28.41	466.125	217	2.83534	0.995099
54	29.15	28.96	478.214	216.7	2.81639	0.994966
55	29.7	29.51	490.397	218	2.79258	0.994834
56	30.25	30.06	503.057	215.2	2.72634	0.994699
57	30.8	30.61	515.651	216.7	2.69529	0.994564
58	31.35	31.16	528.764	217.2	2.67228	0.994429
59	31.9	31.71	541.609	218.8	2.65181	0.994294
60	32.45	32.26	554.931	218.2	2.75415	0.994348
61	33	32.81	567.754	216.8	2.7483	0.994212
62	33.55	33.36	580.6	218.9	2.73316	0.994076
63	34.1	33.91	593.511	216.7	2.72115	0.993939
64	34.65	34.46	606.474	216.7	2.79114	0.993801
65	35.2	35.01	619.466	219	2.80021	0.993662
66	35.75	35.56	632.049	218.5	2.79916	0.993522
67	36.3	36.11	644.987	217.8	2.80268	0.993381
68	36.85	36.66	658.258	216.6	2.60721	0.993334
69	37.4	37.21	672.128	216.9	2.55722	0.993191
70	37.95	37.76	686.651	216.9	2.57407	0.993048
71	38.5	38.31	700.679	217.1	2.58756	0.992906
72	39.05	38.86	715.027	216.6	2.5368	0.992765
73	39.6	39.41	729.278	216.1	2.55194	0.992621
74	40.15	39.96	744.239	216.6	2.5651	0.992475
75	40.7	40.51	758.743	217.5	2.72434	0.992552
76	41.25	41.06	772.407	217.4	2.8495	0.992406
77	41.8	41.61	785.836	217.9	2.85282	0.99226
78	42.35	42.16	798.901	217.6	2.85547	0.992113
79	42.9	42.71	812.307	218.1	3.06223	0.991964
80	43.45	43.26	824.811	218.5	3.11595	0.991815
81	44	43.81	837.1	218.7	3.1191	0.991667
82	44.55	44.36	849.379	219.1	3.12225	0.991518
83	45.1	44.91	861.97	216.5	2.859	0.991504
84	45.65	45.46	875.368	218.1	2.7916	0.991355
85	46.2	46.01	889.092	216.1	2.79427	0.991205
86	46.75	46.56	903.166	218.5	2.77661	0.991054
87	47.3	47.11	917.332	216.5	2.68643	0.990902
88	47.85	47.66	931.975	216.9	2.68898	0.990749
89	48.4	48.21	946.982	217	2.69159	0.990596
90	48.95	48.76	961.227	216.8	2.77609	0.990612
91	49.5	49.31	975.765	217.9	2.80446	0.990458
92	50.05	49.86	990.158	217.2	2.80712	0.990303
93	50.6	50.41	1004.54	217.1	2.83451	0.990147
94	51.15	50.96	1018.79	216.6	2.89605	0.989991
95	51.7	51.51	1032.38	217.7	2.89861	0.989835
96	52.25	52.06	1046.66	218.5	2.90125	0.989678
97	52.8	52.61	1060.59	217.9	2.84355	0.989699
98	53.35	53.16	1074.8	216.8	2.82931	0.989542
99	53.9	53.71	1089.08	216.8	2.83161	0.989386
100	54.45	54.26	1103.71	218.3	2.86618	0.989227
101	55	54.81	1118.16	217	2.92895	0.989068
102	55.55	55.36	1132.65	219.1	2.93118	0.988905
103	56.1	55.91	1146.79	216.7	2.93326	0.988744
104	56.65	56.46	1160.92	217.2	3.0769	0.988817
105	57.2	57.01	1174.39	218.5	3.09566	0.988655
106	57.75	57.56	1188.11	218.6	3.09752	0.988492
107	58.3	58.11	1201.5	218.4	3.06339	0.988333
108	58.85	58.66	1215.04	217	2.97439	0.988171
109	59.4	59.21	1229.32	218.1	2.97578	0.988008
110	59.95	59.76	1243.6	217.9	2.97702	0.987843
111	60.5	60.31	1258.22	217.8	2.95814	0.9879
112	61.05	60.86	1272.59	217.4	2.95485	0.987735
113	61.6	61.41	1286.98	217.3	2.9556	0.98757
114	62.15	61.96	1301.71	218.8	3.00361	0.987404
115	62.7	62.51	1315.87	217.8	3.05567	0.987237
116	63.25	63.06	1330.45	218.5	3.05584	0.987069
117	63.8	63.61	1344.71	217.4	3.05896	0.9869
118	64.35	64.16	1358.62	219.1	3.11356	0.986942
119	64.9	64.71	1372.62	218.5	3.11302	0.986775
120	65.45	65.26	1386.62	217.4	3.11224	0.986608
121	66	65.81	1400.62	217.5	2.91576	0.986439
122	66.55	66.36	1415.92	217.1	2.79223	0.986269
123	67.1	66.91	1431.9	216.9	2.79112	0.986096
124	67.65	67.46	1447.89	217.1	2.83675	0.985926
125	68.2	68.01	1463.27	218.6	2.88627	0.985945
126	68.75	68.56	1478.74	216.6	2.88428	0.985776
127	69.3	69.11	1494.22	217.3	2.88828	0.985605
128	69.85	69.66	1509.68	217	2.89925	0.985432
129	70.4	70.21	1525.09	217.3	2.89642	0.98526
130	70.95	70.76	1540.51	218.5	2.88815	0.985087
131	71.5	71.31	1556.34	216.7	2.85585	0.985086
132	72.05	71.86	1571.99	217.6	2.85227	0.984914
133	72.6	72.41	1588.02	217.8	2.84626	0.98474
134	73.15	72.96	1604.08	216.4	2.77255	0.984565
135	73.7	73.51	1620.58	216.7	2.76822	0.984387
136	74.25	74.06	1637.11	218.3	2.76664	0.98421
137	74.8	74.61	1654.01	216.3	2.83133	0.984209
138	75.35	75.16	1670.18	218	2.8258	0.984034
139	75.9	75.71	1686.02	217.9	2.82008	0.98386
140	76.45	76.26	1702.25	216.8	2.73106	0.983686
141	77	76.81	1719.77	217	2.7197	0.983503
142	77.55	77.36	1736.97	217.5	2.72073	0.983322
143	78.1	77.91	1754.17	217.7	2.78505	0.983313
144	78.65	78.46	1770.6	218.1	2.78488	0.983136
145	79.2	79.01	1787.4	216.2	2.78075	0.982958
146	79.75	79.56	1804.23	217.8	2.69528	0.982778
147	80.3	80.11	1821.97	216.5	2.69511	0.982595
148	80.85	80.66	1839.34	216.6	2.72966	0.982416
149	81.4	81.21	1856.5	217.9	2.9139	0.982459
150	81.95	81.76	1872.57	216.5	2.91372	0.982278
151	82.5	82.31	1888.99	219.4	2.90562	0.982097
152	83.05	82.86	1905.46	217.6	2.83013	0.981915
153	83.6	83.41	1922.01	217.6	2.82996	0.981735
154	84.15	83.96	1938.21	217.2	2.82584	0.981557
155	84.7	84.51	1955.51	217.8	2.77711	0.981549
156	85.25	85.06	1972.76	217.3	2.77695	0.981365
157	85.8	85.61	1990	216.9	2.76094	0.98118
158	86.35	86.16	2007.35	216.5	2.67854	0.980998
159	86.9	86.71	2025.24	217.6	2.67839	0.980813
160	87.45	87.26	2043.51	216.7	2.74263	0.980628
161	88	87.81	2060.99	219.2	2.86033	0.980653
162	88.55	88.36	2078.1	216.9	2.86017	0.980466
163	89.1	88.91	2095.22	216.9	2.82833	0.98028
164	89.65	89.46	2112.53	218	2.78461	0.980094
165	90.2	90.01	2129.75	216.9	2.78446	0.979909
166	90.75	90.56	2147.34	217.2	2.7249	0.979722
167	91.3	91.11	2165.32	216.6	2.67822	0.979743
168	91.85	91.66	2184	217.1	2.67807	0.979555
169	92.4	92.21	2202.29	217.1	2.86601	0.979366
170	92.95	92.76	2219.39	217.8	2.91435	0.979178
171	93.5	93.31	2236.56	218.5	2.9142	0.97899
172	94.05	93.86	2253.39	217.9	2.86261	0.978965
173	94.6	94.41	2270.87	217.2	2.85357	0.978773
174	95.15	94.96	2288.78	217.8	2.85342	0.97858
175	95.7	95.51	2306.32	215.5	2.46926	0.978389
176	96.25	96.06	2326.61	216.2	2.46815	0.978198
177	96.8	96.61	2346.9	217	2.54031	0.978008
178	97.35	97.16	2366.62	216.8	2.6164	0.977961
179	97.9	97.71	2385.38	216.6	2.61629	0.97777
180	98.45	98.26	2404.54	215.6	2.60232	0.97758
181	99	98.81	2423.8	216.8	2.60022	0.977389
182	99.55	99.36	2443.08	217.6	2.63276	0.977198
183	100.1	99.91	2462.51	216.9	2.72861	0.97723
184	100.65	100.46	2480.89	217	2.7285	0.977037
185	101.2	101.01	2499.65	217.8	2.81936	0.976844
186	101.75	101.56	2517.8	217.1	2.89637	0.97665
187	102.3	102.11	2535.12	218.5	2.89626	0.976456
188	102.85	102.66	2552.8	217.5	2.83982	0.976262
189	103.4	103.21	2570.84	218.1	2.81698	0.976332
190	103.95	103.76	2589.02	216.8	2.81689	0.976138
191	104.5	104.31	2607.2	218	2.95516	0.975944
192	105.05	104.86	2624.54	218.5	2.96792	0.975749
193	105.6	105.41	2641.8	217.7	2.96289	0.975553
194	106.15	105.96	2659.1	217.4	2.76021	0.975606
195	106.7	106.51	2678.04	217	2.76014	0.97541
196	107.25	107.06	2696.61	217.4	2.81146	0.975214
197	107.8	107.61	2714.85	216.7	2.92701	0.975019
198	108.35	108.16	2732.72	218.9	2.92694	0.974823
199	108.9	108.71	2750.24	218.5	2.98122	0.974627
200	109.45	109.26	2767.45	218.4	3.04832	0.974771
201	110	109.81	2784.28	218.5	3.04827	0.974575
202	110.55	110.36	2801.45	217.6	3.0897	0.974378
203	111.1	110.91	2818.39	218.9	3.13212	0.97418
204	111.65	111.46	2835.1	218.7	3.13209	0.973981
205	112.2	112.01	2851.82	218.7	2.96713	0.973781
206	112.75	112.56	2869.82	217.7	2.82185	0.973841
207	113.3	113.11	2888.01	217	2.82182	0.973645
208	113.85	113.66	2906.21	216.6	2.85144	0.973449
209	114.4	114.21	2924.22	218.2	2.8613	0.973254
210	114.95	114.76	2942.9	217.9	2.86129	0.973054
211	115.5	115.31	2961.21	217.3	2.72488	0.973087
212	116.05	115.86	2980.45	216.7	2.72388	0.972889
213	116.6	116.41	2999.69	217.6	2.7565	0.972691
214	117.15	116.96	3018.71	217.1	2.81383	0.972492
215	117.7	117.51	3037.35	217.7	2.81383	0.972292
216	118.25	118.06	3055.99	217.8	2.89192	0.972092
217	118.8	118.61	3074.14	217.6	2.93048	0.972182
218	119.35	119.16	3092.04	218.2	2.93051	0.971984
219	119.9	119.71	3110.29	218.6	2.93746	0.971782
220	120.45	120.26	3128.51	218.9	2.93849	0.97158
221	121	120.81	3146.72	216.2	2.88516	0.971377
222	121.55	121.36	3165.28	216.7	2.61822	0.971365
223	122.1	121.91	3185.72	216.3	2.61825	0.971162
224	122.65	122.46	3206.57	218.2	2.65094	0.970959
225	123.2	123.01	3226.77	216.8	2.66582	0.970755
226	123.75	123.56	3246.86	215.9	2.68368	0.970551
227	124.3	124.11	3267.21	218.1	2.74804	0.97059
228	124.85	124.66	3286.71	216.9	2.74811	0.970386
229	125.4	125.21	3306.58	216.6	2.77391	0.970182
230	125.95	125.76	3325.9	218.3	2.78785	0.969977
231	126.5	126.31	3345.5	216.9	2.78201	0.969772
232	127.05	126.86	3365.15	216.2	2.68611	0.9698
233	127.6	127.41	3385.11	217.6	2.68621	0.969595
234	128.15	127.96	3405.46	217.4	2.73481	0.96939
235	128.7	128.51	3425.45	217.2	2.77452	0.969185
236	129.25	129.06	3445.16	217.5	2.77464	0.968979
237	129.8	129.61	3464.87	217.6	2.83714	0.968773
238	130.35	130.16	3483.79	218.1	2.83728	0.968864
239	130.9	130.71	3503.07	216.6	2.88298	0.968658
240	131.45	131.26	3522.05	219	2.95641	0.968452
241	132	131.81	3540.56	217.8	2.95659	0.968245
242	132.55	132.36	3559.08	217.4	2.84388	0.968039
243	133.1	132.91	3578.33	217.8	2.79353	0.968143
244	133.65	133.46	3598.29	217	2.81848	0.967937
245	134.2	134.01	3617.72	218.6	3.0317	0.96773
246	134.75	134.56	3635.79	218.4	3.03193	0.967523
247	135.3	135.11	3653.85	217.8	3.01929	0.967316
248	135.85	135.66	3672	218.3	2.99377	0.967459
249	136.4	136.21	3690.65	218.7	2.99402	0.967252
250	136.95	136.76	3708.95	216.6	3.01907	0.967044
251	137.5	137.31	3727.1	219	3.03521	0.966837
252	138.05	137.86	3745.5	218.9	3.0355	0.966629
253	138.6	138.41	3763.56	216.1	2.87705	0.966421
254	139.15	138.96	3782.99	218.7	2.84655	0.966495
255	139.7	139.51	3802.25	217.7	2.83392	0.966288
256	140.25	140.06	3821.6	217.9	2.79249	0.96608
257	140.8	140.61	3841.62	217	2.79277	0.965872
258	141.35	141.16	3861.27	216.7	2.84173	0.965663
259	141.9	141.71	3880.95	218.4	2.8629	0.965738
260	142.45	142.26	3900.48	217.5	2.85229	0.96553
261	143	142.81	3919.72	217.1	2.77309	0.965322
262	143.55	143.36	3939.9	217.5	2.77341	0.965113
263	144.1	143.91	3960.07	217.2	2.80655	0.964904
264	144.65	144.46	3979.64	218.1	2.82977	0.965004
265	145.2	145.01	3999.42	217.1	2.8351	0.964795
266	145.75	145.56	4019.16	217.1	2.93797	0.964587
267	146.3	146.11	4037.86	218.4	2.93837	0.964378
268	146.85	146.66	4056.92	218.5	2.92085	0.964168
269	147.4	147.21	4076.09	216.5	2.89637	0.964269
270	147.95	147.76	4095.43	218.6	2.89679	0.96406
271	148.5	148.31	4114.76	218.5	2.85735	0.963851
272	149.05	148.86	4134.01	217.1	2.8488	0.963642
273	149.6	149.41	4153.68	217.2	2.85422	0.963432
274	150.15	149.96	4173.32	217.7	2.87063	0.963552
275	150.7	150.51	4192.84	218.2	2.87109	0.963343
276	151.25	151.06	4212.36	216.1	2.93843	0.963133
277	151.8	151.61	4231.44	218.3	2.97288	0.962924
278	152.35	152.16	4250.31	219	2.9734	0.962714
279	152.9	152.71	4269.17	217.5	2.97094	0.962504
280	153.45	153.26	4288.05	219	2.97148	0.962606
281	154	153.81	4306.93	217.2	2.88804	0.962397
282	154.55	154.36	4326.36	216.6	2.75456	0.962187
283	155.1	154.91	4346.74	217.7	2.75506	0.961977
284	155.65	155.46	4367.11	218	2.87967	0.961767
285	156.2	156.01	4386.61	217.7	2.89425	0.961874
286	156.75	156.56	4406.01	217.4	2.8788	0.961664
287	157.3	157.11	4425.51	216.8	2.84532	0.961454
288	157.85	157.66	4445.25	218	2.8459	0.961244
289	158.4	158.21	4464.99	219	2.99092	0.961034
290	158.95	158.76	4483.78	217.3	3.03173	0.961149
291	159.5	159.31	4502.65	218.5	2.99829	0.960939
292	160.05	159.86	4521.39	217	2.75096	0.960729
293	160.6	160.41	4541.83	217.3	2.75155	0.960519
294	161.15	160.96	4562.26	216.9	2.81746	0.960308
295	161.7	161.51	4582.22	217.7	2.85229	0.960415
296	162.25	162.06	4601.93	217.9	2.85497	0.960204
297	162.8	162.61	4621.99	218	2.86774	0.959994
298	163.35	163.16	4641.61	217.1	2.86844	0.959783
299	163.9	163.71	4661.22	217.7	2.85303	0.959573
300	164.45	164.26	4680.95	217.5	2.84368	0.959677
301	165	164.81	4701.1	217.3	2.84643	0.959467
302	165.55	165.36	4720.87	218.6	2.86229	0.959256
303	166.1	165.91	4740.54	216.9	2.86304	0.959045
304	166.65	166.46	4760.21	216.5	2.80223	0.958835
305	167.2	167.01	4780.68	217.4	2.76058	0.958916
306	167.75	167.56	4801.08	217.3	2.76031	0.958706
307	168.3	168.11	4821.48	216.5	2.75702	0.958495
308	168.85	168.66	4842.29	217.4	2.75779	0.958284
309	169.4	169.21	4862.73	218.4	2.90837	0.958073
310	169.95	169.76	4882.11	218	2.97512	0.958228
311	170.5	170.31	4901.4	217.5	2.97807	0.958017
312	171.05	170.86	4920.33	217.7	3.00132	0.957806
313	171.6	171.41	4939.11	218.1	3.00227	0.957596
314	172.15	171.96	4958.24	218.7	2.91995	0.957384
315	172.7	172.51	4977.56	217.2	2.84062	0.957502
316	173.25	173.06	4997.41	217	2.84152	0.957291
317	173.8	173.61	5017.63	217.4	2.87194	0.95708
318	174.35	174.16	5037.28	217.4	2.87288	0.956869
319	174.9	174.71	5056.92	218.1	2.84125	0.956658
320	175.45	175.26	5077.16	216.8	2.80963	0.95679
321	176	175.81	5097.24	217.5	2.81669	0.956579
322	176.55	176.36	5117.66	217.6	2.97177	0.956368
323	177.1	176.91	5136.66	218	2.97284	0.956157
324	177.65	177.46	5156.01	218.3	3.00258	0.955946
325	178.2	178.01	5174.82	218.3	3.03954	0.956084
326	178.75	178.56	5193.4	218	3.04069	0.955873
327	179.3	179.11	5212.32	217.3	2.82063	0.955662
328	179.85	179.66	5232.36	217.6	2.77765	0.955451
329	180.4	180.21	5253.08	216.3	2.833	0.955239
330	180.95	180.76	5273.04	217.5	2.91924	0.955391
331	181.5	181.31	5292.75	218.4	2.9204	0.95518
332	182.05	181.86	5312.11	217.5	2.96885	0.954969
333	182.6	182.41	5331.51	218.4	2.97623	0.954758
334	183.15	182.96	5350.52	217.5	2.9661	0.954546
335	183.7	183.51	5369.94	217.8	2.94156	0.954335
336	184.25	184.06	5389.18	218.3	2.94275	0.954424
337	184.8	184.61	5408.76	215.6	2.63699	0.954213
338	185.35	185.16	5430.22	216.7	2.55672	0.954002
339	185.9	185.71	5452.77	216.5	2.65342	0.95379
340	186.45	186.26	5474.11	217.7	2.74106	0.953841
341	187	186.81	5495.14	216.4	2.70602	0.95363
342	187.55	187.36	5516.07	215.5	2.56468	0.953419
343	188.1	187.91	5538.56	216.9	2.56567	0.953208
344	188.65	188.46	5560.64	217.7	3.05651	0.952996
345	189.2	189.01	5579.52	219	3.07762	0.953163
346	189.75	189.56	5597.93	217.5	3.00403	0.952952
347	190.3	190.11	5617.15	217.8	2.87744	0.952741
348	190.85	190.66	5636.84	217	2.87863	0.952529
349	191.4	191.21	5656.9	217.6	2.86736	0.952318
350	191.95	191.76	5676.68	217.5	2.86649	0.952463
351	192.5	192.31	5696.82	216.8	2.88647	0.952252
352	193.05	192.86	5716.83	218.3	2.91482	0.952041
353	193.6	193.41	5736.29	217	2.91606	0.951829
354	194.15	193.96	5756.11	219.1	3.09207	0.951618
355	194.7	194.51	5774.46	217	3.11131	0.95182
356	195.25	195.06	5793.03	218.7	3.08648	0.951608
357	195.8	195.61	5811.42	218.8	3.02172	0.951397
358	196.35	196.16	5830.55	216.8	3.02307	0.951186
359	196.9	196.71	5849.68	218.1	3.0812	0.950974
360	197.45	197.26	5868.1	218.3	3.10683	0.951137
361	198	197.81	5886.72	218.1	3.08191	0.950926
362	198.55	198.36	5905.14	217.2	2.7972	0.950714
363	199.1	198.91	5925.83	216.9	2.79841	0.950503
364	199.65	199.46	5946.13	217.1	2.73763	0.950291
365	200.2	200.01	5967.27	216.2	2.71362	0.950428
366	200.75	200.56	5988.59	217.3	2.82207	0.950217
367	201.3	201.11	6008.73	218.2	3.01646	0.950005
368	201.85	201.66	6027.92	217.8	3.01784	0.949794
369	202.4	202.21	6047.11	217.4	2.89333	0.949582
370	202.95	202.76	6066.77	217	2.87243	0.949731
371	203.5	203.31	6086.93	217.8	2.88006	0.94952
372	204.05	203.86	6106.67	218.3	2.89086	0.949308
373	204.6	204.41	6126.71	216.3	2.89216	0.949097
374	205.15	204.96	6146.75	218.6	2.95716	0.948885
375	205.7	205.51	6166	216.9	2.96171	0.949045
376	206.25	206.06	6185.56	217.3	2.93329	0.948834
377	206.8	206.61	6205.33	217.1	2.90484	0.948623
378	207.35	207.16	6224.92	217.8	2.90189	0.948411
379	207.9	207.71	6244.91	217.1	2.79894	0.9482
380	208.45	208.26	6265.25	216.6	2.8002	0.948334
381	209	208.81	6285.96	218.1	2.86964	0.948123
382	209.55	209.36	6306.18	217.6	2.90617	0.947912
383	210.1	209.91	6325.78	216.5	2.86262	0.9477
384	210.65	210.46	6346.05	216.2	2.74229	0.947489
385	211.2	211.01	6367.22	217.4	2.74355	0.947601
386	211.75	211.56	6387.99	216.4	2.75649	0.947389
387	212.3	212.11	6409.05	217	2.75773	0.947178
388	212.85	212.66	6430.11	217.3	2.95078	0.946966
389	213.4	213.21	6449.44	218.6	3.07812	0.947117
390	213.95	213.76	6468.3	217.7	3.03969	0.946905
391	214.5	214.31	6487.41	216	2.66951	0.946694
392	215.05	214.86	6508.78	216.5	2.67068	0.946483
393	215.6	215.41	6530.54	218.6	2.91462	0.946271
394	216.15	215.96	6550.48	217.3	2.97428	0.946393
395	216.7	216.51	6569.66	216.5	2.84296	0.946182
396	217.25	217.06	6590.11	217.1	2.65821	0.94597
397	217.8	217.61	6611.98	215.5	2.67659	0.945759
398	218.35	218.16	6633.31	217.6	2.75848	0.945547
399	218.9	218.71	6654.4	216.3	2.75977	0.945691
400	219.45	219.26	6675.47	215.8	2.91023	0.945479
401	220	219.81	6695.1	218.4	2.93434	0.945268
402	220.55	220.36	6714.93	218.1	2.90642	0.945057
403	221.1	220.91	6734.95	217.5	2.87197	0.944845
404	221.65	221.46	6754.85	216.3	2.8603	0.944975
405	222.2	222.01	6775.2	216.5	2.71206	0.944764
406	222.75	222.56	6796.66	216.6	2.7133	0.944552
407	223.3	223.11	6817.73	216.8	2.90132	0.944341
408	223.85	223.66	6837.81	217.2	2.94745	0.944554
409	224.4	224.21	6857.56	218.6	3.03523	0.944343
410	224.95	224.76	6876.75	217.6	3.1816	0.944132
411	225.5	225.31	6894.73	218.8	3.18314	0.943921
412	226.05	225.86	6913.03	217.1	2.8906	0.943709
413	226.6	226.41	6933.2	217	2.82644	0.943871
414	227.15	226.96	6953.44	216.6	2.86927	0.94366
415	227.7	227.51	6973.75	217.3	2.91991	0.943449
416	228.25	228.06	6993.72	217.5	2.91141	0.943238
417	228.8	228.61	7013.38	216.4	2.76707	0.943026
418	229.35	229.16	7034.46	216.9	2.76839	0.943159
419	229.9	229.71	7055.52	217.2	2.80142	0.942948
420	230.45	230.26	7076.34	216.7	2.81149	0.942736
421	231	230.81	7096.72	216.7	2.7974	0.942525
422	231.55	231.36	7117.58	217.5	2.78332	0.942314
423	232.1	231.91	7138.55	215.9	2.71661	0.942401
424	232.65	232.46	7159.64	214.8	2.49479	0.94219
425	233.2	233.01	7183.04	216.5	2.52643	0.941978
426	233.75	233.56	7206.15	216.9	2.71047	0.941767
427	234.3	234.11	7227.69	216	2.71175	0.941885
428	234.85	234.66	7248.84	216.3	2.71956	0.941674
429	235.4	235.21	7270.31	216.4	2.7219	0.941463
430	235.95	235.76	7291.78	217.4	2.98215	0.941252
431	236.5	236.31	7311.01	218.7	3.10955	0.941421
432	237.05	236.86	7329.8	217	3.0106	0.94121
433	237.6	237.41	7349.21	215.8	2.68703	0.940999
434	238.15	237.96	7370.96	216.8	2.68714	0.940788
435	238.7	238.51	7392.33	216	2.65189	0.940577
436	239.25	239.06	7414.38	216.2	2.65313	0.9407
437	239.8	239.61	7436.41	217.6	2.77726	0.940489
438	240.35	240.16	7457.47	216.3	2.80519	0.940278
439	240.9	240.71	7477.94	216.1	2.85099	0.940067
440	241.45	241.26	7498.46	216.9	2.88689	0.939856
441	242	241.81	7518.73	217.9	2.93302	0.940063
442	242.55	242.36	7538.68	216.9	3.08936	0.939852
443	243.1	242.91	7557.28	218.6	3.0908	0.939641
444	243.65	243.46	7576.22	217.2	3.08098	0.93943
445	244.2	244.01	7595.22	218.7	3.07799	0.939624
446	244.75	244.56	7614.24	216.7	2.98475	0.939413
447	245.3	245.11	7633.5	216.2	2.77743	0.939202
448	245.85	245.66	7654.58	217.1	2.78763	0.938991
449	246.4	246.21	7675.59	217.4	3.04878	0.93878
450	246.95	246.76	7694.81	218.3	3.05028	0.938995
451	247.5	247.31	7713.66	216	2.98608	0.938784
452	248.05	247.86	7733.28	216.7	2.94453	0.938573
453	248.6	248.41	7753.18	218.7	2.95039	0.938363
454	249.15	248.96	7773.05	218.4	2.96643	0.938151
455	249.7	249.51	7792.45	215.9	2.96783	0.938327
456	250.25	250.06	7812.2	216.9	2.79866	0.938116
457	250.8	250.61	7833.15	216.4	2.78076	0.937904
458	251.35	251.16	7854.24	216.4	2.93565	0.937692
459	251.9	251.71	7874.22	217.6	3.02443	0.93748
460	252.45	252.26	7893.62	218.2	3.00767	0.937692
461	253	252.81	7913.12	217.3	2.95897	0.93748
462	253.55	253.36	7932.95	216.8	2.9603	0.937268
463	254.1	253.91	7952.77	216.7	2.80049	0.937057
464	254.65	254.46	7973.73	216.5	2.78707	0.9372
465	255.2	255.01	7994.79	216.7	2.734	0.936988
466	255.75	255.56	8016.26	215.7	2.71258	0.936777
467	256.3	256.11	8037.9	217	2.65617	0.936565
468	256.85	256.66	8060.01	214.8	2.60882	0.936353
469	257.4	257.21	8082.52	216.8	2.72183	0.936496
470	257.95	257.76	8104.1	217.3	2.88327	0.936284
471	258.5	258.31	8124.48	216.5	2.82297	0.936073
472	259.05	258.86	8145.29	215.9	2.56243	0.935861
473	259.6	259.41	8168.22	215.4	2.57596	0.935969
474	260.15	259.96	8191.04	215.7	2.66301	0.935757
475	260.7	260.51	8213.11	216.6	2.66753	0.935546
476	261.25	261.06	8235.15	216.2	2.82693	0.935334
477	261.8	261.61	8255.95	217.2	2.8282	0.935504
478	262.35	262.16	8276.74	216.6	2.8031	0.935293
479	262.9	262.71	8297.71	216.5	2.79741	0.935082
480	263.45	263.26	8318.74	216.7	2.76771	0.93487
481	264	263.81	8340	216.7	2.74715	0.934659
482	264.55	264.36	8361.42	215.5	2.70952	0.934801
483	265.1	264.91	8383.13	216.2	2.65816	0.93459
484	265.65	265.46	8405.27	216	2.71632	0.934379
485	266.2	266.01	8426.94	216.5	2.85509	0.934167
486	266.75	266.56	8447.56	217.2	2.86095	0.934365
487	267.3	267.11	8468.14	217.2	2.92674	0.934153
488	267.85	267.66	8488.25	217.1	2.92794	0.933942
489	268.4	268.21	8508.37	215.2	2.87136	0.933731
490	268.95	268.76	8528.88	217.2	2.85637	0.933519
491	269.5	269.31	8549.51	218.3	2.92816	0.93373
492	270.05	269.86	8569.62	217.1	2.99203	0.933519
493	270.6	270.41	8589.32	216.4	2.99673	0.933308
494	271.15	270.96	8608.98	218	3.01307	0.933096
495	271.7	271.51	8628.54	216.7	3.01438	0.933327
496	272.25	272.06	8648.09	216.8	2.9364	0.933116
497	272.8	272.61	8668.17	217.3	2.9271	0.932905
498	273.35	273.16	8688.31	216.4	2.869	0.932693
499	273.9	273.71	8708.86	216.4	2.83068	0.932482
500	274.45	274.26	8729.7	217.1	2.88411	0.932697
501	275	274.81	8750.14	216.7	2.97846	0.932486
502	275.55	275.36	8769.95	217.5	2.96209	0.932275
503	276.1	275.91	8789.86	216	2.73307	0.932064
504	276.65	276.46	8811.46	216.3	2.73418	0.932276
505	277.2	277.01	8833.03	217	3.03479	0.932066
506	277.75	277.56	8852.48	217.8	3.0665	0.931855
507	278.3	278.11	8871.72	217.1	3.02416	0.931644
508	278.85	278.66	8891.25	217.1	2.99124	0.931433
509	279.4	279.21	8910.99	217.1	3.01596	0.931694
510	279.95	279.76	8930.56	216.8	3.096	0.931483
511	280.5	280.31	8949.63	218	3.09714	0.931272
512	281.05	280.86	8968.7	217.9	3.02749	0.931061
513	281.6	281.41	8988.21	216.5	3.01681	0.93085
514	282.15	281.96	9007.8	217.3	3.02744	0.931107
515	282.7	282.51	9027.31	217	3.03796	0.930896
516	283.25	283.06	9046.76	217.4	3.03904	0.930686
517	283.8	283.61	9066.2	216.9	3.04248	0.930475
518	284.35	284.16	9085.63	217.5	3.04365	0.930699
519	284.9	284.71	9105.04	217.5	2.81645	0.930488
520	285.45	285.26	9126.03	215.4	2.77765	0.930278
521	286	285.81	9147.32	216.1	2.91468	0.930067
522	286.55	286.36	9167.61	217.9	2.98171	0.929856
523	287.1	286.91	9187.44	216.6	3.10135	0.930146
524	287.65	287.46	9206.51	218.1	3.2995	0.929936
525	288.2	288.01	9224.43	218.5	3.3006	0.929725
526	288.75	288.56	9242.36	217.5	3.03903	0.929514
527	289.3	289.11	9261.83	217	3.00918	0.929303
528	289.85	289.66	9281.49	216.4	3.08513	0.929584
529	290.4	290.21	9300.67	218	3.14455	0.929373
530	290.95	290.76	9319.49	217.7	3.14795	0.929163
531	291.5	291.31	9338.3	217.6	3.1609	0.928952
532	292.05	291.86	9357.03	217.5	3.16203	0.929276
533	292.6	292.41	9375.74	217.9	3.2506	0.929066
534	293.15	292.96	9393.96	217.7	3.28169	0.928855
535	293.7	293.51	9412	218.3	3.31766	0.928645
536	294.25	294.06	9429.85	218.4	3.42156	0.928434
537	294.8	294.61	9447.17	218.5	3.42274	0.928752
538	295.35	295.16	9464.47	217.6	3.09591	0.928542
539	295.9	295.71	9483.6	216	2.96564	0.928332
540	296.45	296.26	9503.58	217.7	3.04036	0.928121
541	297	296.81	9523.07	216.9	3.16338	0.927911
542	297.55	297.36	9541.81	218.1	3.16442	0.928237
543	298.1	297.91	9560.53	217.3	3.33187	0.928027
544	298.65	298.46	9578.32	218.8	3.33278	0.927816
545	299.2	299.01	9596.1	217.9	3.24775	0.927606
546	299.75	299.56	9614.36	216.9	3.1606	0.927395
547	300.3	300.11	9633.12	218	3.17967	0.927746
548	300.85	300.66	9651.77	217.7	3.43758	0.927535
549	301.4	301.21	9669.02	219.2	3.43845	0.927325
550	301.95	301.76	9686.27	218	3.42222	0.927115
551	302.5	302.31	9703.6	218.1	3.40598	0.926904
552	303.05	302.86	9721.03	218.5	3.40701	0.927307
553	303.6	303.41	9738.43	218	3.56955	0.927097
554	304.15	303.96	9755.05	219.4	3.58392	0.926886
555	304.7	304.51	9771.61	218.7	3.4228	0.926676
556	305.25	305.06	9788.95	215.7	3.01338	0.926466
557	305.8	305.61	9808.65	217.9	3.01422	0.926767
558	306.35	306.16	9828.34	217.9	3.14601	0.926557
559	306.9	306.71	9847.21	216.5	3.15758	0.926347
560	307.45	307.26	9866.01	218.8	3.25756	0.926136
561	308	307.81	9884.24	217.5	3.34952	0.925926
562	308.55	308.36	9901.98	218.2	3.34307	0.926264
563	309.1	308.91	9919.74	217.4	3.15796	0.926054
564	309.65	309.46	9938.54	217.1	3.15861	0.925844
565	310.2	310.01	9957.35	218.4	3.22709	0.925634
566	310.75	310.56	9975.76	217.7	3.26659	0.925423
567	311.3	311.11	9993.96	217.4	3.29661	0.925784
568	311.85	311.66	10012	218.4	3.42188	0.925574
569	312.4	312.21	10029.3	218.4	3.42248	0.925364
570	312.95	312.76	10046.7	217.9	3.32153	0.925154
571	313.5	313.31	10064.6	218.4	3.26725	0.924944
572	314.05	313.86	10082.8	216.9	3.31919	0.925331
573	314.6	314.41	10100.7	218.1	3.56662	0.925121
574	315.15	314.96	10117.4	219.5	3.56715	0.924912
575	315.7	315.51	10134.1	218.5	3.44811	0.924701
576	316.25	316.06	10151.3	218.1	3.34686	0.924491
577	316.8	316.61	10169.1	217.6	3.34753	0.924859
578	317.35	317.16	10186.8	218.5	3.34067	0.92465
579	317.9	317.71	10204.7	217.9	3.34113	0.92444
580	318.45	318.26	10222.5	217.1	3.26344	0.92423
581	319	318.81	10240.7	216.8	3.19574	0.92402
582	319.55	319.36	10259.3	218.7	3.21578	0.924373
583	320.1	319.91	10277.8	218.1	3.3798	0.924163
584	320.65	320.46	10295.4	218	3.38018	0.923953
585	321.2	321.01	10313	218.3	3.26319	0.923743
586	321.75	321.56	10331.3	216.4	3.1881	0.923533
587	322.3	322.11	10350	218.4	3.1789	0.923854
588	322.85	322.66	10368.7	216.9	3.14163	0.923644
589	323.4	323.21	10387.6	217.7	3.14197	0.923435
590	323.95	323.76	10406.6	217.4	3.12532	0.923225
591	324.5	324.31	10425.7	216.6	3.1232	0.923015
592	325.05	324.86	10444.7	218.5	3.36124	0.9234
593	325.6	325.41	10462.5	218.7	3.66766	0.92319
594	326.15	325.96	10478.7	219.3	3.66783	0.922981
595	326.7	326.51	10495	218.6	3.71281	0.922771
596	327.25	327.06	10511	218.1	3.7254	0.922561
597	327.8	327.61	10527	220.3	3.70829	0.922967
598	328.35	328.16	10543.1	216.9	3.19892	0.922757
599	328.9	328.71	10561.7	218.1	3.1991	0.922547
600	329.45	329.26	10580.3	217.6	3.18105	0.922338
601	330	329.81	10599.1	217.3	3.17028	0.922128
602	330.55	330.36	10617.9	217.5	3.20581	0.922474
603	331.1	330.91	10636.5	217.7	3.31074	0.922264
604	331.65	331.46	10654.5	217.9	3.31082	0.922054
605	332.2	332.01	10672.5	219.1	3.32066	0.921844
606	332.75	332.56	10690.5	217.4	3.32315	0.921635
607	333.3	333.11	10708.5	217.4	3.24041	0.921964
608	333.85	333.66	10726.9	217.2	3.08161	0.921754
609	334.4	334.21	10746.2	217.1	3.08288	0.921544
610	334.95	334.76	10765.6	217.2	3.22348	0.921334
611	335.5	335.31	10784.1	217.9	3.22347	0.921125
612	336.05	335.86	10802.6	218	3.31498	0.921486
613	336.6	336.41	10820.6	218.5	3.37726	0.921276
614	337.15	336.96	10838.3	217.7	3.34902	0.921067
615	337.7	337.51	10856.1	216.9	3.09984	0.920857
616	338.25	338.06	10875.4	217.4	3.09993	0.921194
617	338.8	338.61	10894.7	217.9	3.27933	0.920984
618	339.35	339.16	10912.9	218.5	3.33771	0.920775
619	339.9	339.71	10930.8	217.3	3.24132	0.920565
620	340.45	340.26	10949.2	216.4	3.03444	0.920355
621	341	340.81	10968.9	217.6	3.03568	0.920698
622	341.55	341.36	10988.6	218.1	3.40067	0.920488
623	342.1	341.91	11006.2	218	3.40039	0.920279
624	342.65	342.46	11023.7	218.5	3.32563	0.920069
625	343.2	343.01	11041.7	218.2	3.25239	0.919859
626	343.75	343.56	11060.1	216.8	3.24378	0.920192
627	344.3	344.11	11078.5	217.1	3.13462	0.919982
628	344.85	344.66	11097.6	217.8	3.13436	0.919773
629	345.4	345.21	11116.7	216.8	3.01982	0.919563
630	345.95	345.76	11136.5	216.6	2.98005	0.919353
631	346.5	346.31	11156.5	217.3	3.20855	0.919702
632	347.05	346.86	11175.2	218.6	3.49908	0.919493
633	347.6	347.41	11192.3	218.8	3.49855	0.919283
634	348.15	347.96	11209.4	218.4	3.28481	0.919074
635	348.7	348.51	11227.6	218	3.26377	0.918864
636	349.25	349.06	11245.9	216.1	3.21511	0.919207
637	349.8	349.61	11264.6	217.7	3.16521	0.918998
638	350.35	350.16	11283.5	218	3.20575	0.918788
639	350.9	350.71	11302.1	217.3	3.56137	0.918578
640	351.45	351.26	11318.9	219.6	3.56085	0.918959
641	352	351.81	11335.8	219.4	3.35301	0.918749
642	352.55	352.36	11353.6	216.5	3.16408	0.91854
643	353.1	352.91	11372.5	217.5	3.15274	0.91833
644	353.65	353.46	11391.5	216.7	3.0779	0.918121
645	354.2	354.01	11411	217.5	3.07752	0.918481
646	354.75	354.56	11430.4	217.9	3.3948	0.918272
647	355.3	355.11	11448.1	218.7	3.47292	0.918062
648	355.85	355.66	11465.3	218.4	3.49397	0.917853
649	356.4	356.21	11482.5	219.1	3.5576	0.917643
650	356.95	356.76	11499.3	218.6	3.55686	0.918019
651	357.5	357.31	11516.2	217.6	3.24635	0.917809
652	358.05	357.86	11534.6	217	3.09481	0.9176
653	358.6	358.41	11554	217.4	3.08819	0.91739
654	359.15	358.96	11573.4	217.2	3.07322	0.917181
655	359.7	359.51	11592.9	217.2	3.07266	0.917514
656	360.25	360.06	11612.4	218.1	3.269	0.917305
657	360.8	360.61	11630.8	217.3	3.26934	0.917095
658	361.35	361.16	11649.1	218.3	3.29002	0.916886
659	361.9	361.71	11667.4	217.3	3.30468	0.916676
660	362.45	362.26	11685.5	218.4	3.28952	0.917026
661	363	362.81	11703.8	217	3.15852	0.916816
662	363.55	363.36	11722.7	217.8	3.15769	0.916607
663	364.1	363.91	11741.7	217.5	3.21636	0.916397
664	364.65	364.46	11760.4	218.4	3.23691	0.916187
665	365.2	365.01	11779	217	3.07586	0.916474
666	365.75	365.56	11798.5	215.9	2.79399	0.916265
667	366.3	366.11	11819.9	216.5	2.79923	0.916055
668	366.85	366.66	11841.4	216.3	2.822	0.915846
669	367.4	367.21	11862.7	216.5	2.82146	0.916074
670	367.95	367.76	11884	216.2	2.81732	0.915864
671	368.5	368.31	11905.3	216.5	2.81669	0.915655
672	369.05	368.86	11926.6	215.6	2.63349	0.915445
673	369.6	369.41	11949.4	215.7	2.62608	0.915652
674	370.15	369.96	11972.3	216.7	2.84637	0.915443
675	370.7	370.51	11993.4	216.4	2.8562	0.915233
676	371.25	371.06	12014.4	216.4	2.69623	0.915024
677	371.8	371.61	12036.7	215.4	2.66322	0.914814
678	372.35	372.16	12059.3	215.8	2.59226	0.914985
679	372.9	372.71	12082.5	215.5	2.57559	0.914775
680	373.45	373.26	12105.8	213.9	2.40286	0.914566
681	374	373.81	12130.9	215.3	2.37957	0.914356
682	374.55	374.36	12156.1	215.4	2.46043	0.914472
683	375.1	374.91	12180.6	214.6	2.49435	0.914263
684	375.65	375.46	12204.7	215.8	2.66864	0.914053
685	376.2	376.01	12227.2	216.3	2.65197	0.914225
686	376.75	376.56	12249.9	214.8	2.56399	0.914015
687	377.3	377.11	12273.4	216.2	2.5027	0.913806
688	377.85	377.66	12297.5	214.2	2.29354	0.913596
689	378.4	378.21	12323.7	214	2.30226	0.913677
690	378.95	378.76	12349.8	214.9	2.31208	0.913468
691	379.5	379.31	12375.9	213.5	2.33439	0.913258
692	380.05	379.86	12401.7	215.2	2.34418	0.913049
693	380.6	380.41	12427.4	215.6	2.42794	0.913155
694	381.15	380.96	12452.2	214.3	2.42745	0.912946
695	381.7	381.51	12477	214.3	2.29981	0.912736
696	382.25	382.06	12503.2	214.5	2.22364	0.912784
697	382.8	382.61	12530.3	212.9	2.07348	0.912574
698	383.35	383.16	12559.4	213.5	2.07766	0.912365
699	383.9	383.71	12588.4	213.2	2.08408	0.912156
700	384.45	384.26	12617.3	213.8	2.12196	0.912179
701	385	384.81	12645.7	213.3	2.17783	0.91197
702	385.55	385.36	12673.4	214.5	2.23488	0.91176
703	386.1	385.91	12700.4	214.1	2.24464	0.911824
704	386.65	386.46	12727.3	214.2	2.22507	0.911615
705	387.2	387.01	12754.4	213.1	2.0306	0.911406
706	387.75	387.56	12784.1	212.9	2.10192	0.911432
707	388.3	388.11	12812.8	214.3	2.17108	0.911223
708	388.85	388.66	12840.6	213.7	2.25606	0.911013
709	389.4	389.21	12867.4	214.9	2.25787	0.910804
710	389.95	389.76	12894.1	214	2.2013	0.910869
711	390.5	390.31	12921.6	213.6	2.15381	0.91066
712	391.05	390.86	12949.6	213.4	2.10308	0.910451
713	391.6	391.41	12978.3	213.9	2.23258	0.910506
714	392.15	391.96	13005.4	214.6	2.25681	0.910297
715	392.7	392.51	13032.2	214.4	2.25522	0.910088
716	393.25	393.06	13059	213.8	2.18424	0.910142
717	393.8	393.61	13086.6	213.3	2.09449	0.909932
718	394.35	394.16	13115.5	213.7	2.1778	0.909723
719	394.9	394.71	13143.3	214.2	2.21984	0.909514
720	395.45	395.26	13170.5	215	2.37173	0.909598
721	396	395.81	13196	214.5	2.3297	0.909389
722	396.55	396.36	13221.9	213.9	2.24974	0.90918
723	397.1	396.91	13248.8	214.9	2.32868	0.909279
724	397.65	397.46	13274.8	214.9	2.38525	0.90907
725	398.2	398.01	13300.2	214.3	2.2829	0.908861
726	398.75	398.56	13326.7	214.2	2.24334	0.908651
727	399.3	399.11	13353.7	213.2	2.05054	0.908706
728	399.85	399.66	13383.2	213.4	2.09784	0.908497
729	400.4	400.21	13412	214	2.1496	0.908288
730	400.95	400.76	13440.2	213.5	2.19583	0.908345
731	401.5	401.31	13467.8	214.5	2.23537	0.908136
732	402.05	401.86	13494.9	215.7	2.41985	0.907927
733	402.6	402.41	13519.9	214	2.36349	0.908031
734	403.15	402.96	13545.5	214.6	2.25498	0.907822
735	403.7	403.51	13572.4	213.6	2.16238	0.907612
736	404.25	404.06	13600.4	213.5	2.10436	0.907403
737	404.8	404.61	13629.2	213.4	2.07852	0.907443
738	405.35	405.16	13658.4	213.4	2.12118	0.907234
739	405.9	405.71	13687	214.3	2.19591	0.907024
740	406.45	406.26	13714.6	213.7	2.18105	0.907088
741	407	406.81	13742.4	214	2.17945	0.906879
742	407.55	407.36	13770.2	215.4	2.3217	0.90667
743	408.1	407.91	13796.3	213.4	2.32446	0.906773
744	408.65	408.46	13822.4	215.3	2.33274	0.906564
745	409.2	409.01	13848.4	213.9	2.2492	0.906355
746	409.75	409.56	13875.4	213.8	2.16812	0.906146
747	410.3	410.11	13903.4	214.3	2.30556	0.906237
748	410.85	410.66	13929.7	215	2.34585	0.906028
749	411.4	411.21	13955.6	215.7	2.59893	0.905819
750	411.95	411.76	13979	215.9	2.58819	0.90598
751	412.5	412.31	14002.4	215.3	2.40474	0.905771
752	413.05	412.86	14027.7	214.5	2.37207	0.905562
753	413.6	413.41	14053.3	214.5	2.26236	0.905353
754	414.15	413.96	14080.2	214	2.33445	0.905472
755	414.7	414.51	14106.2	215.2	2.41977	0.905263
756	415.25	415.06	14131.3	215.8	2.49409	0.905054
757	415.8	415.61	14155.6	215.5	2.54081	0.904845
758	416.35	416.16	14179.6	215.1	2.43536	0.905006
759	416.9	416.71	14204.5	214.4	2.39066	0.904797
760	417.45	417.26	14229.9	217.5	2.79702	0.904587
761	418	417.81	14251.7	216.6	2.89907	0.904378
762	418.55	418.36	14272.7	216.4	2.73878	0.904618
763	419.1	418.91	14294.9	215.8	2.66285	0.904409
764	419.65	419.46	14317.7	216	2.62234	0.9042
765	420.2	420.01	14340.9	215.6	2.59841	0.903991
766	420.75	420.56	14364.3	216	2.36183	0.904132
767	421.3	421.11	14390.1	213.2	2.24862	0.903923
768	421.85	421.66	14417.1	214.8	2.45239	0.903714
769	422.4	422.21	14441.9	215.8	2.47247	0.903834
770	422.95	422.76	14466.6	214.4	2.26426	0.903625
771	423.5	423.31	14493.4	214.4	2.27672	0.903416
772	424.05	423.86	14520.2	215	2.31204	0.903206
773	424.6	424.41	14546.5	214	2.25371	0.903289
774	425.15	424.96	14573.5	214.4	2.20092	0.90308
775	425.7	425.51	14601.2	213.1	2.07448	0.90287
776	426.25	426.06	14630.6	213.6	2.0783	0.902661
777	426.8	426.61	14659.9	214.3	2.18074	0.902705
778	427.35	427.16	14687.8	213.5	2.17582	0.902496
779	427.9	427.71	14715.8	214.1	2.17091	0.902287
780	428.45	428.26	14743.9	214.9	2.31229	0.902372
781	429	428.81	14770.3	214.5	2.32897	0.902162
782	429.55	429.36	14796.4	214.3	2.29146	0.901953
783	430.1	429.91	14823.1	215	2.29298	0.902047
784	430.65	430.46	14849.7	214.6	2.29556	0.901838
785	431.2	431.01	14876.2	214.3	2.17606	0.901628
786	431.75	431.56	14904.2	213.1	2.09566	0.901419
787	432.3	432.11	14933.4	216.3	2.40488	0.901508
788	432.85	432.66	14958.7	214	2.39333	0.901298
789	433.4	433.21	14984.2	213.5	2.07141	0.901089
790	433.95	433.76	15013.7	213.5	2.13757	0.901139
791	434.5	434.31	15042.2	214.5	2.21338	0.90093
792	435.05	434.86	15069.8	214.4	2.21705	0.900721
793	435.6	435.41	15097.4	214.1	2.21428	0.900784
794	436.15	435.96	15124.9	214.2	2.18356	0.900574
795	436.7	436.51	15152.9	213.8	2.13143	0.900365
796	437.25	437.06	15181.6	213.4	2.05902	0.900156
797	437.8	437.61	15211.3	212.9	1.98246	0.900164
798	438.35	438.16	15242.1	213.1	1.96591	0.899955
799	438.9	438.71	15273.2	212.9	1.96648	0.899745
800	439.45	439.26	15304.2	213.1	1.96278	0.899735
801	440	439.81	15335.4	212.9	1.96548	0.899525
802	440.55	440.36	15366.5	212.9	1.97672	0.899316
803	441.1	440.91	15397.4	213.9	2.05946	0.899326
804	441.65	441.46	15427.1	213.5	2.0781	0.899117
805	442.2	442.01	15456.6	213.3	1.98371	0.898908
806	442.75	442.56	15487.4	212.6	1.98319	0.898903
807	443.3	443.11	15518.3	213.4	1.97841	0.898694
808	443.85	443.66	15549.2	212.2	1.91299	0.898484
809	444.4	444.21	15581.2	213.8	1.98694	0.898477
810	444.95	444.76	15612	213.2	2.04489	0.898267
811	445.5	445.31	15641.9	213.4	2.00607	0.898058
812	446.05	445.86	15672.5	213	2.00234	0.898056
813	446.6	446.41	15703.1	213.3	1.99649	0.897847
814	447.15	446.96	15733.7	213	1.95035	0.897637
815	447.7	447.51	15765.2	212.8	1.91803	0.897608
816	448.25	448.06	15797.1	212.5	1.88046	0.897399
817	448.8	448.61	15829.7	213.2	1.91491	0.897189
818	449.35	449.16	15861.7	212	1.89008	0.89715
819	449.9	449.71	15894.1	212.7	1.86103	0.89694
820	450.45	450.26	15927.1	212.7	1.87007	0.896731
821	451	450.81	15959.9	212.2	1.80621	0.896668
822	451.55	451.36	15993.9	211.7	1.76565	0.896458
823	452.1	451.91	16028.6	211.9	1.76838	0.896249
824	452.65	452.46	16063.3	212.7	1.86708	0.896188
825	453.2	453.01	16096.2	212.5	1.88029	0.895978
826	453.75	453.56	16128.8	212.6	1.87137	0.895769
827	454.3	454.11	16161.6	212.4	1.78769	0.895707
828	454.85	454.66	16196	211.2	1.75882	0.895497
829	455.4	455.21	16230.9	212.2	1.76049	0.895287
830	455.95	455.76	16265.8	212.5	1.83995	0.895213
831	456.5	456.31	16299.2	211.9	1.76907	0.895004
832	457.05	456.86	16333.9	211.9	1.75286	0.894919
833	457.6	457.41	16369	211.9	1.74928	0.894709
834	458.15	457.96	16404.1	211.8	1.70057	0.894499
835	458.7	458.51	16440.3	210.5	1.62254	0.894382
836	459.25	459.06	16478.2	211.6	1.63474	0.894172
837	459.8	459.61	16515.8	211.2	1.67207	0.893962
838	460.35	460.16	16552.6	211.5	1.68423	0.893847
839	460.9	460.71	16589.1	211.8	1.6566	0.893637
840	461.45	461.26	16626.3	209.8	1.57352	0.893498
841	462	461.81	16665.4	211.3	1.55223	0.893288
842	462.55	462.36	16705.1	210.5	1.56547	0.893079
843	463.1	462.91	16744.4	210.6	1.53689	0.892924
844	463.65	463.46	16784.5	210.4	1.51355	0.892714
845	464.2	464.01	16825.2	209.7	1.46097	0.892541
846	464.75	464.56	16867.4	210.9	1.55357	0.892332
847	465.3	465.11	16907.1	210.9	1.56259	0.892178
848	465.85	465.66	16946.5	210.3	1.56014	0.891968
849	466.4	466.21	16986	211.3	1.59729	0.891759
850	466.95	466.76	17024.6	210	1.48437	0.891601
851	467.5	467.31	17066.2	211.3	1.57048	0.891391
852	468.05	467.86	17105.5	209.3	1.44828	0.891216
853	468.6	468.41	17148.1	210.2	1.45629	0.891006
854	469.15	468.96	17190.5	210.3	1.46532	0.890818
855	469.7	469.51	17232.6	209.6	1.44939	0.890608
856	470.25	470.06	17275.2	210.3	1.4553	0.890398
857	470.8	470.61	17317.7	209.6	1.41235	0.890204
858	471.35	471.16	17361.4	209.1	1.35071	0.889994
859	471.9	471.71	17407.2	209.2	1.35042	0.889772
860	472.45	472.26	17452.9	209.2	1.35116	0.889562
861	473	472.81	17498.7	209	1.3301	0.889338
862	473.55	473.36	17545.2	210.5	1.502	0.889128
863	474.1	473.91	17586.4	209.7	1.41251	0.888934
864	474.65	474.46	17630.2	208.9	1.36036	0.888724
865	475.2	475.01	17675.7	209.8	1.39944	0.888512
866	475.75	475.56	17719.9	209.8	1.40326	0.888302
867	476.3	476.11	17764	209.1	1.35324	0.88808
868	476.85	476.66	17809.8	208.8	1.3198	0.88787
869	477.4	477.21	17856.7	209	1.33504	0.887643
870	477.95	477.76	17903.2	209.5	1.36578	0.887433
871	478.5	478.31	17948.5	209.4	1.38717	0.887223
872	479.05	478.86	17993.2	209.7	1.40132	0.887011
873	479.6	479.41	18037.5	209.5	1.3855	0.886801
874	480.15	479.96	18082.2	209.2	1.35525	0.886584
875	480.7	480.51	18128	209.3	1.3539	0.886374
876	481.25	481.06	18173.8	209.3	1.35978	0.886151
877	481.8	481.61	18219.5	209.2	1.34194	0.885941
878	482.35	482.16	18265.7	209.3	1.34885	0.885713
879	482.9	482.71	18311.8	208.3	1.24955	0.885503
880	483.45	483.26	18361.5	210	1.43469	0.885275
881	484	483.81	18404.8	209.4	1.39526	0.885065
882	484.55	484.36	18449.3	210.1	1.40932	0.884854
883	485.1	484.91	18493.4	208.7	1.34318	0.884644
884	485.65	485.46	18539.7	209.5	1.34493	0.884417
885	486.2	486.01	18586	209.1	1.34564	0.884206
886	486.75	486.56	18632.2	209.3	1.36073	0.883983
887	487.3	487.11	18677.9	209.7	1.36657	0.883773
888	487.85	487.66	18723.4	209	1.36625	0.883551
889	488.4	488.21	18769	209.8	1.35361	0.883341
890	488.95	488.76	18815	208.6	1.32458	0.883111
891	489.5	489.31	18862	209.3	1.36014	0.882901
892	490.05	489.86	18907.8	210.2	1.39258	0.88269
893	490.6	490.41	18952.6	208.2	1.28266	0.882463
894	491.15	490.96	19001.2	208.8	1.309	0.882252
895	491.7	491.51	19048.8	210.1	1.40586	0.882023
896	492.25	492.06	19093.1	209.1	1.3534	0.881813
897	492.8	492.61	19139.2	209.3	1.36636	0.881589
898	493.35	493.16	19184.9	210.9	1.52711	0.881379
899	493.9	493.71	19225.7	209.1	1.35242	0.881178
900	494.45	494.26	19271.9	209.8	1.37862	0.880967
901	495	494.81	19317.2	208.7	1.314	0.880737
902	495.55	495.36	19364.7	209.5	1.34634	0.880527
903	496.1	495.91	19411.1	208.9	1.32052	0.880291
904	496.65	496.46	19458.4	209.1	1.30185	0.880081
905	497.2	497.01	19506.4	208.5	1.28216	0.879834
906	497.75	497.56	19555.2	209.3	1.30938	0.879623
907	498.3	498.11	19602.9	208.5	1.27442	0.879375
908	498.85	498.66	19652	208.7	1.29755	0.879164
909	499.4	499.21	19700.2	209.7	1.37959	0.878938
910	499.95	499.76	19745.6	209.8	1.42389	0.878727
911	500.5	500.31	19789.5	210.1	1.41034	0.878513
912	501.05	500.86	19833.9	209.2	1.33187	0.878302
913	501.6	501.41	19880.9	208.2	1.26347	0.878051
914	502.15	501.96	19930.5	208.9	1.28654	0.877841
915	502.7	502.51	19979.2	209.3	1.34102	0.877606
916	503.25	503.06	20025.9	209.6	1.36196	0.877395
917	503.8	503.61	20072	209.2	1.37073	0.877172
918	504.35	504.16	20117.7	210	1.37442	0.876962
919	504.9	504.71	20163.4	208.9	1.33564	0.876729
920	505.45	505.26	20210.3	209.4	1.34137	0.876519
921	506	505.81	20257.1	209.1	1.32789	0.876279
922	506.55	506.36	20304.4	209	1.30632	0.876068
923	507.1	506.91	20352.4	208.9	1.29184	0.875858
924	507.65	507.46	20401	208.5	1.27737	0.875606
925	508.2	508.01	20450.2	209.7	1.37296	0.875384
926	508.75	508.56	20496	209.8	1.40484	0.875174
927	509.3	509.11	20540.7	209.4	1.35312	0.874963
928	509.85	509.66	20587.2	209.2	1.32657	0.874729
929	510.4	510.21	20634.6	209	1.30608	0.874518
930	510.95	510.759	20682.7	209	1.30978	0.874273
931	511.5	511.308	20730.7	209.6	1.37787	0.874063
932	512.05	511.857	20776.4	209.3	1.34435	0.873834
933	512.6	512.406	20823.2	209.3	1.33496	0.873623
934	513.15	512.955	20870.4	209.2	1.32959	0.873384
935	513.7	513.504	20917.8	209.3	1.32021	0.873174
936	514.25	514.052	20965.5	208.5	1.27564	0.872924
937	514.8	514.601	21014.9	209.4	1.32958	0.872714
938	515.35	515.15	21062.3	209.1	1.34428	0.872479
939	515.9	515.699	21109.2	209.9	1.387	0.872268
940	516.45	516.248	21154.6	209.6	1.35561	0.872035
941	517	516.797	21201.1	208.6	1.28411	0.871825
942	517.55	517.346	21250.3	208.6	1.27877	0.871572
943	518.1	517.895	21299.6	209.5	1.35155	0.871362
944	518.65	518.444	21346.3	210.1	1.43903	0.871147
945	519.2	518.993	21390.2	210.7	1.4227	0.870937
946	519.75	519.542	21434.6	208.6	1.32353	0.870698
947	520.3	520.091	21482.3	209	1.30519	0.870487
948	520.85	520.64	21530.7	209.8	1.34581	0.870244
949	521.4	521.188	21577.7	209	1.30853	0.870034
950	521.95	521.737	21626	208.5	1.27023	0.869778
951	522.5	522.286	21675.8	209.1	1.30985	0.869568
952	523.05	522.835	21724.1	209.7	1.37228	0.869341
953	523.6	523.384	21770.2	209.9	1.41365	0.86913
954	524.15	523.933	21814.9	210.2	1.43014	0.868906
955	524.7	524.482	21859.2	209.2	1.33739	0.868696
956	525.25	525.031	21906.5	209.5	1.35692	0.868452
957	525.8	525.58	21953.2	209.1	1.30288	0.868242
958	526.35	526.129	22001.8	209.2	1.31945	0.868031
959	526.9	526.678	22049.8	208.8	1.27733	0.867776
960	527.45	527.227	22099.5	208.7	1.2581	0.867566
961	528	527.776	22149.8	209	1.29458	0.867303
962	528.55	528.324	22198.8	209.8	1.38942	0.867055
963	529.1	528.873	22244.5	208.6	1.25417	0.866845
964	529.65	529.422	22295.1	208.7	1.26578	0.866634
965	530.2	529.971	22345.2	210.3	1.44454	0.866396
966	530.75	530.52	22389.2	209.5	1.36025	0.866185
967	531.3	531.069	22435.8	209.2	1.33913	0.865948
968	531.85	531.618	22483.3	209.9	1.38027	0.865737
969	532.4	532.167	22529.3	209.4	1.33843	0.865497
970	532.95	532.716	22576.8	208.7	1.29953	0.865286
971	533.5	533.265	22625.7	209.7	1.32193	0.865033
972	534.05	533.814	22673.8	208.7	1.29194	0.864822
973	534.6	534.363	22723	209.3	1.30346	0.864566
974	535.15	534.912	22771.8	209	1.30707	0.864355
975	535.7	535.46	22820.5	209.3	1.30575	0.8641
976	536.25	536.009	22869.2	208.9	1.29357	0.863889
977	536.8	536.558	22918.5	209.1	1.30803	0.863636
978	537.35	537.107	22967.2	209.5	1.36279	0.863425
979	537.9	537.656	23013.9	210.2	1.40365	0.8632
980	538.45	538.205	23059.3	209.8	1.42384	0.862989
981	539	538.754	23104.1	210.4	1.42052	0.862768
982	539.55	539.303	23148.9	209.7	1.38587	0.862557
983	540.1	539.852	23194.9	209.5	1.35805	0.862318
984	540.65	540.401	23241.9	209.9	1.35573	0.862107
985	541.2	540.95	23289	208.4	1.25716	0.861843
986	541.75	541.499	23339.7	209.3	1.31089	0.861632
987	542.3	542.048	23388.4	209.7	1.35759	0.861388
988	542.85	542.597	23435.5	209.4	1.34254	0.861177
989	543.4	543.145	23483	210	1.39497	0.860945
990	543.95	543.694	23528.8	209.8	1.37897	0.860734
991	544.5	544.243	23575.2	209.6	1.36299	0.860499
992	545.05	544.792	23622.1	210	1.39871	0.860288
993	545.6	545.341	23667.8	209.7	1.36714	0.86004
994	546.15	545.89	23714.5	209.4	1.33262	0.859829
995	546.7	546.439	23762.5	209.3	1.29612	0.859618
996	547.25	546.988	23811.9	208.3	1.22624	0.85934
997	547.8	547.537	23864.1	208.7	1.24554	0.859066
998	548.35	548.086	23915.5	209	1.2824	0.858855
999	548.9	548.635	23965.4	209.1	1.28208	0.85857
1000	549.45	549.184	24015.4	208.1	1.19168	0.858359
1001	550	549.733	24069.2	209	1.2736	0.858093
1002	550.55	550.281	24119.5	209.2	1.3113	0.857882
1003	551.1	550.83	24168.4	209.6	1.35084	0.857633
1004	551.65	551.379	24215.9	209.6	1.3466	0.857422
1005	552.2	551.928	24263.5	208.9	1.28108	0.857154
1006	552.75	552.477	24313.6	209.3	1.30217	0.856943
1007	553.3	553.026	24362.9	208.6	1.23852	0.856658
1008	553.85	553.575	24414.7	208.5	1.23235	0.856447
1009	554.4	554.124	24466.8	210.7	1.46169	0.856212
1010	554.95	554.673	24510.8	209.6	1.35415	0.856
1011	555.5	555.222	24558.2	208.7	1.25871	0.855713
1012	556.05	555.771	24609.3	208.4	1.21847	0.855502
1013	556.6	556.32	24662	208.6	1.22791	0.855214
1014	557.15	556.869	24714.4	208.7	1.24025	0.855003
1015	557.7	557.417	24766.3	208.7	1.24868	0.854725
1016	558.25	557.966	24817.8	209.1	1.28427	0.854514
1017	558.8	558.515	24867.9	208.8	1.25776	0.854239
1018	559.35	559.064	24919.1	209.2	1.2962	0.854028
1019	559.9	559.613	24968.8	208.8	1.25422	0.853744
1020	560.45	560.162	25020.2	208.7	1.24227	0.853533
1021	561	560.711	25072	208.8	1.25843	0.853257
1022	561.55	561.26	25123.3	209.3	1.29873	0.853045
1023	562.1	561.809	25172.9	209.3	1.29164	0.852765
1024	562.65	562.358	25222.8	208.4	1.21681	0.852553
1025	563.2	562.907	25275.9	208.1	1.18643	0.852251
1026	563.75	563.456	25330.2	208.3	1.21136	0.85204
1027	564.3	564.005	25383.5	209.1	1.25266	0.851753
1028	564.85	564.553	25435.1	208.8	1.25428	0.851542
1029	565.4	565.102	25486.6	208.8	1.25204	0.851259
1030	565.95	565.651	25538.2	209	1.26619	0.851047
1031	566.5	566.2	25589.2	209.1	1.28418	0.850771
1032	567.05	566.749	25639.6	209.3	1.27711	0.85056
1033	567.6	567.298	25690.2	208.4	1.2344	0.850273
1034	568.15	567.847	25742.6	208.6	1.23217	0.849983
1035	568.7	568.396	25795.1	209.1	1.24728	0.849772
1036	569.25	568.945	25847	208.2	1.22384	0.849492
1037	569.8	569.494	25899.9	209.7	1.30429	0.849281
1038	570.35	570.043	25949.6	209	1.27327	0.848996
1039	570.9	570.592	26000.4	208.4	1.23161	0.848785
1040	571.45	571.141	26053.1	209.6	1.30905	0.848506
1041	572	571.689	26102.6	208.8	1.25408	0.848295
1042	572.55	572.238	26154.3	208.7	1.23744	0.848013
1043	573.1	572.787	26206.7	209.4	1.3004	0.847802
1044	573.65	573.336	26256.6	208.2	1.18972	0.847502
1045	574.2	573.885	26311.1	208.7	1.23365	0.84729
1046	574.75	574.434	26363.7	209.6	1.32804	0.847014
1047	575.3	574.983	26412.6	208.7	1.23689	0.846803
1048	575.85	575.532	26465.1	209.3	1.29017	0.846525
1049	576.4	576.081	26515.5	209	1.26692	0.846314
1050	576.95	576.63	26566.8	208.6	1.22546	0.846016
1051	577.5	577.179	26619.8	208.4	1.20406	0.845804
1052	578.05	577.728	26673.9	208.5	1.2306	0.845517
1053	578.6	578.277	26726.7	209.6	1.29332	0.845305
1054	579.15	578.826	26777	209.1	1.28348	0.845025
1055	579.7	579.374	26827.7	208.9	1.24596	0.844813
1056	580.25	579.923	26880	208.5	1.22751	0.844521
1057	580.8	580.472	26933	209	1.24632	0.844233
1058	581.35	581.021	26985.3	208.8	1.25174	0.844021
1059	581.9	581.57	27037.4	208.9	1.24381	0.843737
1060	582.45	582.119	27089.8	208.7	1.25018	0.843525
1061	583	582.668	27141.9	209.4	1.29836	0.843271
1062	583.55	583.217	27192.2	209.8	1.36052	0.843059
1063	584.1	583.766	27240.1	210.3	1.3847	0.842834
1064	584.65	584.315	27287.2	209.8	1.43137	0.842623
1065	585.2	584.864	27332.8	211.7	1.47223	0.842411
1066	585.75	585.413	27377.2	209.3	1.35636	0.842159
1067	586.3	585.962	27425.3	209.6	1.32771	0.841947
1068	586.85	586.51	27474.5	209.9	1.33872	0.841667
1069	587.4	587.059	27523.4	208.1	1.2	0.841455
1070	587.95	587.608	27577.8	209.5	1.30975	0.841202
1071	588.5	588.157	27627.7	210.7	1.44472	0.84099
1072	589.05	588.706	27673	210.9	1.48448	0.84076
1073	589.6	589.255	27717.1	210	1.37659	0.840548
1074	590.15	589.804	27764.6	209.7	1.33208	0.840282
1075	590.7	590.353	27813.8	209.2	1.3016	0.84007
1076	591.25	590.902	27864.1	210.2	1.37746	0.83981
1077	591.8	591.451	27911.6	209.8	1.33488	0.839598
1078	592.35	592	27960.7	208.7	1.24025	0.839298
1079	592.9	592.549	28013.5	208.4	1.203	0.839086
1080	593.45	593.098	28068	209.4	1.29347	0.838805
1081	594	593.646	28118.7	209.2	1.27338	0.838594
1082	594.55	594.195	28170.2	208.7	1.22302	0.838303
1083	595.1	594.744	28223.8	209.2	1.27372	0.838091
1084	595.65	595.293	28275.4	209.9	1.35699	0.837836
1085	596.2	595.842	28323.7	209.7	1.3445	0.837624
1086	596.75	596.391	28372.6	210.4	1.42163	0.837391
1087	597.3	596.94	28418.8	210.7	1.43616	0.837179
1088	597.85	597.489	28464.5	209.9	1.38465	0.836929
1089	598.4	598.038	28512	210	1.36754	0.836717
1090	598.95	598.587	28560	210	1.36162	0.836452
1091	599.5	599.136	28608.3	209.7	1.32768	0.83624
1092	600.05	599.685	28657.9	209.1	1.29367	0.835965
1093	600.6	600.234	28708.7	209.4	1.30087	0.835753
1094	601.15	600.782	28759.3	209.7	1.31274	0.835488
1095	601.7	601.331	28809.5	209.3	1.32645	0.835276
1096	602.25	601.88	28859.1	210.2	1.35227	0.835023
1097	602.8	602.429	28907.8	209.7	1.36871	0.834811
1098	603.35	602.978	28956	210.3	1.3749	0.834563
1099	603.9	603.527	29003.9	209.9	1.37644	0.834351
1100	604.45	604.076	29051.8	210.3	1.39932	0.834115
1101	605	604.625	29098.9	210.5	1.42398	0.833903
1102	605.55	605.174	29145.2	210.4	1.41533	0.833691
1103	606.1	605.723	29191.8	211.2	1.49974	0.833466
1104	606.65	606.272	29235.8	210	1.40545	0.833254
1105	607.2	606.821	29282.8	211	1.46139	0.833013
1106	607.75	607.37	29328	210.7	1.41037	0.832801
1107	608.3	607.918	29374.8	209.2	1.32574	0.832535
1108	608.85	608.467	29424.6	209.7	1.32731	0.832323
1109	609.4	609.016	29474.4	210.2	1.37337	0.832074
1110	609.95	609.565	29522.5	210.2	1.38971	0.831862
1111	610.5	610.114	29570.1	210.2	1.39032	0.831621
1112	611.05	610.663	29617.7	210.2	1.40662	0.831409
1113	611.6	611.212	29664.7	210.8	1.43484	0.831151
1114	612.15	611.761	29710.8	210.2	1.39495	0.83094
1115	612.7	612.31	29758.3	209.7	1.32254	0.83064
1116	613.25	612.859	29808.4	208.8	1.23105	0.830428
1117	613.8	613.408	29862.2	209.1	1.25785	0.830132
1118	614.35	613.957	29914.8	209.2	1.25945	0.82992
1119	614.9	614.506	29967.4	208.7	1.25173	0.829632
1120	615.45	615.054	30020.4	210.2	1.31555	0.829421
1121	616	615.603	30070.8	208.5	1.24097	0.829132
1122	616.55	616.152	30124.3	209.3	1.26583	0.82892
1123	617.1	616.701	30176.7	209.4	1.30824	0.82864
1124	617.65	617.25	30227.4	210.3	1.33015	0.828428
1125	618.2	617.799	30277.3	208.6	1.26877	0.828148
1126	618.75	618.348	30329.7	210	1.31112	0.827936
1127	619.3	618.897	30380.3	209.5	1.30993	0.827651
1128	619.85	619.446	30431.1	209.4	1.28931	0.827439
1129	620.4	619.995	30482.6	209.4	1.28349	0.827156
1130	620.95	620.544	30534.4	209.3	1.28693	0.826943
1131	621.5	621.093	30586.1	209.7	1.31162	0.826668
1132	622.05	621.642	30636.8	209.7	1.3215	0.826456
1133	622.6	622.191	30687.2	209.7	1.32215	0.826185
1134	623.15	622.739	30737.6	209.7	1.32189	0.825973
1135	623.7	623.288	30787.9	209.7	1.3483	0.825722
1136	624.25	623.837	30837.3	211	1.43584	0.82551
1137	624.8	624.386	30883.7	209.9	1.35603	0.825243
1138	625.35	624.935	30932.9	209.8	1.33464	0.825031
1139	625.9	625.484	30982.8	210	1.36008	0.824723
1140	626.45	626.033	31031.9	209.1	1.24468	0.82451
1141	627	626.582	31085.5	208.6	1.20828	0.82421
1142	627.55	627.131	31140.7	209.3	1.25991	0.823998
1143	628.1	627.68	31193.7	209.1	1.24211	0.82369
1144	628.65	628.229	31247.4	208.5	1.20945	0.823478
1145	629.2	628.778	31302.6	209.1	1.25272	0.823192
1146	629.75	629.327	31356	209.6	1.29579	0.82298
1147	630.3	629.875	31407.5	209.5	1.30291	0.822689
1148	630.85	630.424	31458.9	209.6	1.28335	0.822476
1149	631.4	630.973	31511	208.7	1.25086	0.822172
1150	631.95	631.522	31564.4	209.6	1.24694	0.82196
1151	632.5	632.071	31618.1	208.2	1.21437	0.821677
1152	633.05	632.62	31673.2	209.4	1.29248	0.821465
1153	633.6	633.169	31725	211	1.40004	0.821208
1154	634.15	633.718	31772.9	210.2	1.3916	0.820996
1155	634.7	634.267	31821	209.7	1.34122	0.820751
1156	635.25	634.816	31871	210	1.38563	0.820539
1157	635.8	635.365	31919.3	211.5	1.47409	0.820317
1158	636.35	635.914	31964.8	210.4	1.4359	0.820105
1159	636.9	636.463	32011.5	211.6	1.53376	0.819842
1160	637.45	637.011	32055.3	210.1	1.38011	0.81963
1161	638	637.56	32103.9	209.9	1.34984	0.819364
1162	638.55	638.109	32153.6	210.2	1.36234	0.819152
1163	639.1	638.658	32202.9	209.7	1.34481	0.818897
1164	639.65	639.207	32252.9	210.3	1.37277	0.818684
1165	640.2	639.756	32301.8	210.2	1.3943	0.818472
1166	640.75	640.305	32350	210.8	1.385	0.818213
1167	641.3	640.854	32398.5	209.5	1.36479	0.818001
1168	641.85	641.403	32447.8	210.6	1.38271	0.817733
1169	642.4	641.952	32496.4	210.4	1.37612	0.81752
1170	642.95	642.501	32545.3	209.4	1.2885	0.817216
1171	643.5	643.05	32597.6	208.8	1.23146	0.817004
1172	644.05	643.599	32652.2	209.1	1.2386	0.816697
1173	644.6	644.147	32706.6	209.2	1.24024	0.816398
1174	645.15	644.696	32760.9	208.7	1.22442	0.816186
1175	645.7	645.245	32815.9	209.3	1.26547	0.815902
1176	646.25	645.794	32869.2	209.9	1.30817	0.815689
1177	646.8	646.343	32920.8	209.3	1.29246	0.815427
1178	647.35	646.892	32972.9	209.8	1.32503	0.815215
1179	647.9	647.441	33023.9	210.4	1.37921	0.814974
1180	648.45	647.99	33072.8	210.5	1.40697	0.814762
1181	649	648.539	33120.8	210.6	1.43105	0.814549
1182	649.55	649.088	33168	211	1.43981	0.81431
1183	650.1	649.637	33214.9	210.5	1.42881	0.814098
1184	650.65	650.186	33262.1	210.8	1.43847	0.813854
1185	651.2	650.735	33309.1	211	1.46425	0.813642
1186	651.75	651.283	33355.3	210.2	1.37953	0.813383
1187	652.3	651.832	33404.3	210.5	1.40006	0.813171
1188	652.85	652.381	33452.6	210.1	1.36015	0.812918
1189	653.4	652.93	33502.4	210.4	1.38883	0.812705
1190	653.95	653.479	33551.1	210.4	1.40393	0.812435
1191	654.5	654.028	33599.3	210.8	1.39022	0.812223
1192	655.05	654.577	33648	209.2	1.32226	0.81194
1193	655.6	655.126	33699.2	210.4	1.3447	0.811728
1194	656.15	655.675	33749.6	209.7	1.31282	0.811419
1195	656.7	656.224	33801.3	209	1.24713	0.811206
1196	657.25	656.773	33855.6	209	1.22869	0.810896
1197	657.8	657.322	33910.8	209	1.22851	0.810683
1198	658.35	657.871	33966.1	209	1.22834	0.81038
1199	658.9	658.419	34021.3	209	1.22908	0.810168
1200	659.45	658.968	34076.5	209.4	1.26992	0.809884
1201	660	659.517	34130	210	1.33862	0.809672
1202	660.55	660.066	34180.8	209.4	1.27321	0.809372
1203	661.1	660.615	34234.1	209.5	1.28484	0.80916
1204	661.65	661.164	34287	208.9	1.22916	0.80888
1205	662.2	661.713	34342.4	209.4	1.28177	0.808668
1206	662.75	662.262	34395.4	210.3	1.36744	0.808406
1207	663.3	662.811	34445.2	210.5	1.39601	0.808194
1208	663.85	663.36	34493.9	210	1.34187	0.807952
1209	664.4	663.909	34544.7	211.1	1.46713	0.807739
1210	664.95	664.458	34591.1	210.2	1.38202	0.807495
1211	665.5	665.007	34640.4	210.8	1.42663	0.807282
1212	666.05	665.556	34688.1	210.8	1.41841	0.807043
1213	666.6	666.104	34736.2	210	1.40124	0.80683
1214	667.15	666.653	34784.8	211.2	1.44575	0.806582
1215	667.7	667.202	34832	211.1	1.44736	0.806369
1216	668.25	667.751	34879.1	210.1	1.39806	0.80614
1217	668.8	668.3	34927.9	210.5	1.397	0.805928
1218	669.35	668.849	34976.8	210.8	1.44507	0.805715
1219	669.9	669.398	35024	211.5	1.50442	0.805465
1220	670.45	669.947	35069.4	210.8	1.44297	0.805253
1221	671	670.496	35116.7	210.1	1.35962	0.805024
1222	671.55	671.045	35167	210.8	1.44176	0.804811
1223	672.1	671.594	35214.4	211.4	1.49136	0.804562
1224	672.65	672.143	35260.2	211	1.45124	0.80435
1225	673.2	672.692	35307.3	210.3	1.39668	0.804106
1226	673.75	673.24	35356.3	210.3	1.37863	0.803894
1227	674.3	673.789	35405.9	210.4	1.42764	0.803634
1228	674.85	674.338	35453.9	211.7	1.45509	0.803421
1229	675.4	674.887	35500.9	210	1.38001	0.803174
1230	675.95	675.436	35550.5	209.8	1.34129	0.802961
1231	676.5	675.985	35601.6	210.7	1.40565	0.802749
1232	677.05	676.534	35650.3	210.9	1.44117	0.802485
1233	677.6	677.083	35697.9	210.6	1.41431	0.802273
1234	678.15	677.632	35746.4	209.8	1.31829	0.80199
1235	678.7	678.181	35798.4	210.3	1.37114	0.801778
1236	679.25	678.73	35848.4	209.3	1.25843	0.801525
1237	679.8	679.279	35902.9	210.5	1.39859	0.801312
1238	680.35	679.828	35952	210.5	1.3949	0.80105
1239	680.9	680.376	36001.2	210.4	1.38941	0.800837
1240	681.45	680.925	36050.7	210.4	1.37052	0.800553
1241	682	681.474	36100.8	209.4	1.29581	0.800341
1242	682.55	682.023	36153.8	209.8	1.31102	0.800074
1243	683.1	682.572	36206.3	210	1.33338	0.799862
1244	683.65	683.121	36257.8	210.2	1.36377	0.799611
1245	684.2	683.67	36308.3	210.6	1.40565	0.799399
1246	684.75	684.219	36357.2	210.7	1.40821	0.799142
1247	685.3	684.768	36406.1	210.4	1.38937	0.79893
1248	685.85	685.317	36455.6	210.3	1.37944	0.798674
1249	686.4	685.866	36505.6	210.4	1.39362	0.798462
1250	686.95	686.415	36555	210.7	1.39263	0.798202
1251	687.5	686.964	36604.5	210	1.37287	0.79799
1252	688.05	687.512	36654.7	210.4	1.37814	0.797714
1253	688.6	688.061	36704.7	210.5	1.37804	0.797501
1254	689.15	688.61	36754.8	209.8	1.32958	0.797232
1255	689.7	689.159	36806.6	209.7	1.30701	0.79702
1256	690.25	689.708	36859.4	209.9	1.33118	0.796807
1257	690.8	690.257	36911.3	210.3	1.39194	0.796594
1258	691.35	690.806	36960.9	211.5	1.49392	0.796347
1259	691.9	691.355	37007.1	211.9	1.56159	0.796134
1260	692.45	691.904	37051.4	210.6	1.40952	0.795922
1261	693	692.453	37100.4	210.6	1.40855	0.795696
1262	693.55	693.002	37149.5	210.6	1.4387	0.795483
1263	694.1	693.551	37197.5	211.9	1.49705	0.795258
1264	694.65	694.1	37243.7	210.7	1.49345	0.795045
1265	695.2	694.648	37290	211.6	1.4704	0.794813
1266	695.75	695.197	37337.1	210.6	1.47476	0.7946
1267	696.3	695.746	37384	211.6	1.47911	0.794391
1268	696.85	696.295	37430.8	210.3	1.42319	0.794179
1269	697.4	696.844	37479.5	211.6	1.51957	0.793967
1270	697.95	697.393	37525.1	211.3	1.52039	0.793797
1271	698.5	697.942	37570.7	212.4	1.62369	0.793585
1272	699.05	698.491	37613.3	212.3	1.63671	0.793435
1273	699.6	699.04	37655.7	212.2	1.66275	0.793223
1274	700.15	699.589	37697.4	213.3	1.7457	0.79301
1275	700.7	700.138	37737.1	212.1	1.64358	0.792874
1276	701.25	700.687	37779.3	213.3	1.76458	0.792661
1277	701.8	701.236	37818.6	213.8	1.7766	0.792436
1278	702.35	701.785	37857.7	212.3	1.68693	0.792224
1279	702.9	702.333	37898.9	211.3	1.50158	0.792011
1280	703.45	702.882	37945.1	211.3	1.47769	0.791818
1281	704	703.431	37992.1	210.6	1.48473	0.791605
1282	704.55	703.98	38038.9	212.5	1.61381	0.791397
1283	705.1	704.529	38082	213	1.65126	0.791184
1284	705.65	705.078	38124.1	211.4	1.55515	0.790974
1285	706.2	705.627	38168.8	211.2	1.49083	0.790761
1286	706.75	706.176	38215.4	210.9	1.45984	0.790549
1287	707.3	706.725	38263.1	212.7	1.61376	0.79035
1288	707.85	707.274	38306.2	211.2	1.56914	0.790137
1289	708.4	707.823	38350.6	212.2	1.56826	0.789933
1290	708.95	708.372	38395	211.9	1.5779	0.78972
1291	709.5	708.921	38439.1	211.5	1.53751	0.78953
1292	710.05	709.469	38484.4	211.9	1.56914	0.789318
1293	710.6	710.018	38528.8	212.1	1.60331	0.789105
1294	711.15	710.567	38572.3	212.1	1.60682	0.788894
1295	711.7	711.116	38615.7	212.1	1.5911	0.788681
1296	712.25	711.665	38659.5	211.7	1.55427	0.788467
1297	712.8	712.214	38704.4	211.3	1.50229	0.788255
1298	713.35	712.763	38750.8	211	1.46779	0.788048
1299	713.9	713.312	38798.4	212.3	1.61655	0.787836
1300	714.45	713.861	38841.6	211.6	1.5605	0.787623
1301	715	714.41	38886.3	211.9	1.57458	0.7874
1302	715.55	714.959	38930.7	212	1.54121	0.787187
1303	716.1	715.508	38976	210.7	1.49534	0.786961
1304	716.65	716.057	39022.8	211.6	1.52805	0.786748
1305	717.2	716.605	39068.5	212.5	1.63689	0.786483
1306	717.75	717.154	39111.2	210.4	1.4012	0.78627
1307	718.3	717.703	39161.2	210.8	1.41728	0.786002
1308	718.85	718.252	39210.5	210.3	1.37888	0.785789
1309	719.4	718.801	39261.3	210.4	1.38606	0.785518
1310	719.95	719.35	39311.8	210.5	1.39055	0.785306
1311	720.5	719.899	39362.2	210.3	1.38073	0.785011
1312	721.05	720.448	39412.9	210.5	1.38971	0.784798
1313	721.6	720.997	39463.3	210.5	1.36376	0.784491
1314	722.15	721.546	39514.8	209.5	1.29267	0.784278
1315	722.7	722.095	39569	209.3	1.25741	0.783984
1316	723.25	722.644	39624.8	209.4	1.27552	0.783771
1317	723.8	723.193	39679.8	210.3	1.3378	0.783497
1318	724.35	723.741	39732.3	209.2	1.27828	0.783284
1319	724.9	724.29	39787.2	210.7	1.38543	0.783022
1320	725.45	724.839	39837.9	210	1.35587	0.78281
1321	726	725.388	39889.7	210.7	1.40432	0.78255
1322	726.55	725.937	39939.8	210.4	1.40884	0.782338
1323	727.1	726.486	39989.7	211.3	1.43926	0.78207
1324	727.65	727.035	40038.6	210.2	1.40716	0.781857
1325	728.2	727.584	40088.5	210.7	1.41438	0.781574
1326	728.75	728.133	40138.3	210.9	1.40549	0.781361
1327	729.3	728.682	40188.4	209.8	1.35081	0.781106
1328	729.85	729.231	40240.5	209.9	1.32924	0.780893
1329	730.4	729.78	40293.5	210.1	1.37699	0.780632
1330	730.95	730.329	40344.7	211.3	1.44152	0.780419
1331	731.5	730.877	40393.5	210.9	1.47281	0.780122
1332	732.05	731.426	40441.4	211.2	1.4408	0.779909
1333	732.6	731.975	40490.4	209.9	1.35119	0.779611
1334	733.15	732.524	40542.6	209.6	1.29888	0.779399
1335	733.7	733.073	40596.9	209.8	1.30256	0.779109
1336	734.25	733.622	40651.1	209.8	1.30442	0.778896
1337	734.8	734.171	40705.2	209.7	1.30902	0.778601
1338	735.35	734.72	40759.2	210	1.338	0.778389
1339	735.9	735.269	40812	210.3	1.32995	0.778118
1340	736.45	735.818	40865.1	209.1	1.29654	0.777905
1341	737	736.367	40919.7	210.3	1.34094	0.777641
1342	737.55	736.916	40972.4	210.4	1.39417	0.777428
1343	738.1	737.465	41023.2	210.7	1.41941	0.777188
1344	738.65	738.013	41073	210.9	1.40785	0.776975
1345	739.2	738.562	41123.3	209.9	1.39088	0.77673
1346	739.75	739.111	41174.2	211.2	1.46452	0.776518
1347	740.3	739.66	41222.6	212	1.54218	0.776305
1348	740.85	740.209	41268.5	210.9	1.47284	0.776029
1349	741.4	740.758	41316.6	210.9	1.44432	0.775816
1350	741.95	741.307	41365.7	210.6	1.41483	0.775556
1351	742.5	741.856	41415.9	209.9	1.32649	0.775343
1352	743.05	742.405	41469.3	211.8	1.53404	0.775063
1353	743.6	742.954	41515.6	209.6	1.32397	0.77485
1354	744.15	743.503	41569.2	210.7	1.39729	0.774572
1355	744.7	744.052	41620	209.7	1.32144	0.774359
1356	745.25	744.601	41673.8	210.5	1.38849	0.774065
1357	745.8	745.15	41724.9	210.2	1.36059	0.773852
1358	746.35	745.698	41777.2	209.5	1.28627	0.773553
1359	746.9	746.247	41832.5	210.1	1.3445	0.77325
1360	747.45	746.796	41885.4	209.6	1.29737	0.773037
1361	748	747.345	41940.2	209.7	1.30292	0.772739
1362	748.55	747.894	41994.8	209.7	1.29754	0.772526
1363	749.1	748.443	42049.7	209.4	1.27028	0.772247
1364	749.65	748.992	42105.8	209.4	1.28587	0.772034
1365	750.2	749.541	42161.2	210.2	1.32874	0.771763
1366	750.75	750.09	42214.8	209.6	1.3361	0.77155
1367	751.3	750.639	42268.2	210.9	1.39511	0.771295
1368	751.85	751.188	42319.3	210.3	1.38255	0.771082
1369	752.4	751.737	42370.9	210.1	1.37361	0.770816
1370	752.95	752.286	42422.8	210.9	1.42797	0.770604
1371	753.5	752.834	42472.8	210.9	1.44524	0.770342
1372	754.05	753.383	42522.2	210.7	1.41468	0.770129
1373	754.6	753.932	42572.7	210	1.36953	0.76987
1374	755.15	754.481	42624.8	211.3	1.46545	0.769657
1375	755.7	755.03	42673.6	209.9	1.35158	0.769429
1376	756.25	755.579	42726.5	210.8	1.42782	0.769216
1377	756.8	756.128	42776.6	210.5	1.40443	0.769003
1378	757.35	756.677	42827.5	211	1.46869	0.768779
1379	757.9	757.226	42876.2	211.7	1.54699	0.768566
1380	758.45	757.775	42922.5	211.4	1.52204	0.768347
1381	759	758.324	42969.5	211.4	1.51322	0.768134
1382	759.55	758.873	43016.8	211.2	1.52505	0.767904
1383	760.1	759.422	43063.8	211.8	1.54585	0.767692
1384	760.65	759.97	43110.1	211.6	1.53256	0.767432
1385	761.2	760.519	43156.9	210.9	1.49404	0.76722
1386	761.75	761.068	43204.9	211.6	1.5077	0.767003
1387	762.3	761.617	43252.4	210.4	1.40842	0.76679
1388	762.85	762.166	43303.4	210.5	1.41581	0.766538
1389	763.4	762.715	43354	212	1.57734	0.766326
1390	763.95	763.264	43399.5	211.5	1.52813	0.766113
1391	764.5	763.813	43446.5	211.1	1.47147	0.765861
1392	765.05	764.362	43495.3	210.5	1.41542	0.765648
1393	765.6	764.911	43546.1	210.4	1.40828	0.765399
1394	766.15	765.46	43597.1	211.1	1.45016	0.765186
1395	766.7	766.009	43646.7	210.9	1.44758	0.764917
1396	767.25	766.558	43696.3	210.6	1.445	0.764704
1397	767.8	767.106	43746.1	211.2	1.43516	0.764437
1398	768.35	767.655	43796.2	210	1.37065	0.764225
1399	768.9	768.204	43848.7	209.7	1.34701	0.76395
1400	769.45	768.753	43902.2	210.7	1.40098	0.763737
1401	770	769.302	43953.6	210.7	1.40384	0.763455
1402	770.55	769.851	44004.9	209.8	1.34826	0.763243
1403	771.1	770.4	44058.4	209.8	1.33372	0.762954
1404	771.65	770.949	44112.4	210.3	1.34666	0.762688
1405	772.2	771.498	44166	209.7	1.31651	0.762475
1406	772.75	772.047	44220.7	209.6	1.30559	0.762225
1407	773.3	772.596	44276	210	1.33782	0.762013
1408	773.85	773.145	44330	210.3	1.39102	0.761742
1409	774.4	773.694	44381.9	211.3	1.46859	0.76153
1410	774.95	774.242	44431	210.7	1.42323	0.761271
1411	775.5	774.791	44481.8	209.9	1.35937	0.761058
1412	776.05	775.34	44535	210.3	1.36315	0.760808
1413	776.6	775.889	44588	210	1.3651	0.760596
1414	777.15	776.438	44641	210.6	1.41097	0.760348
1415	777.7	776.987	44692.2	210.8	1.43484	0.760136
1416	778.25	777.536	44742.7	210.5	1.41672	0.759893
1417	778.8	778.085	44793.8	210.6	1.41776	0.759681
1418	779.35	778.634	44844.8	210.6	1.42795	0.759452
1419	779.9	779.183	44895.5	210.8	1.44178	0.75924
1420	780.45	779.732	44945.8	210.8	1.43918	0.759028
1421	781	780.281	44996.1	210.7	1.44845	0.758817
1422	781.55	780.83	45046.2	211.2	1.48415	0.758605
1423	782.1	781.378	45095	211.3	1.52614	0.758393
1424	782.65	781.927	45142.5	211.8	1.54719	0.758181
1425	783.2	782.476	45189.4	211.4	1.53556	0.757982
1426	783.75	783.025	45236.7	211.4	1.52846	0.75777
1427	784.3	783.574	45284.2	211.5	1.53863	0.75757
1428	784.85	784.123	45331.4	211.8	1.58054	0.757357
1429	785.4	784.672	45377.3	211.6	1.56621	0.757174
1430	785.95	785.221	45423.7	211.9	1.57184	0.756961
1431	786.5	785.77	45469.9	211.4	1.54841	0.756749
1432	787.05	786.319	45516.8	211.5	1.60393	0.756565
1433	787.6	786.868	45562.2	213.1	1.64393	0.756353
1434	788.15	787.417	45606.4	211.4	1.60069	0.7562
1435	788.7	787.966	45651.8	212.2	1.62173	0.755987
1436	789.25		45696.7	211.7	1.59292	0.755775
1437	789.8		45742.4	213	1.71423	0.755643
1438	790.35		45784.8	212.4	1.72527	0.755431
1439	790.9		45827	213.1	1.70298	0.75527
1440	791.45		45869.8	212.1	1.71223	0.755058
1441	792		45912.4	214.2	1.88722	0.754901
1442	792.55		45951	213.3	1.78018	0.754688
1443	793.1		45991.9	212.4	1.66957	0.754476
1444	793.65		46035.6	211.6	1.62447	0.754302
1445	794.2		46080.4	212.6	1.67543	0.754089
1446	794.75		46124	213.2	1.77041	0.753924
1447	795.3		46165.2	212	1.63689	0.753712
1448	795.85		46209.8	212.4	1.65706	0.753499
1449	796.4		46253.8	212.3	1.65908	0.753376
1450	796.95		46297.8	212.2	1.672	0.753163
1451	797.5		46341.5	212.7	1.70391	0.753054
1452	798.05		46384.4	212.7	1.72767	0.752842
1453	798.6		46426.6	213.6	1.86475	0.752629
1454	799.15		46465.8	213.9	1.92589	0.752492
1455	799.7		46503.8	214.4	1.92531	0.75228
1456	800.25		46541.8	212.8	1.77022	0.752116
1457	800.8		46583.1	212.9	1.77319	0.751904
1458	801.35		46624.3	213.3	1.77345	0.751691
1459	801.9		46665.6	212.7	1.77551	0.7515
1460	802.45		46706.8	213.2	1.7613	0.751288
1461	803		46748.4	211.8	1.61064	0.751106
1462	803.55		46793.8	211.9	1.60078	0.750893
1463	804.1		46839.6	211.6	1.59732	0.750704
1464	804.65		46885.4	212.6	1.64137	0.750491
1465	805.2		46930.1	212	1.64067	0.750279
1466	805.75		46974.8	212	1.62626	0.750089
1467	806.3		47019.9	212.3	1.63469	0.749877
1468	806.85		47064.7	211.7	1.58455	0.749708
1469	807.4		47111	211.6	1.57098	0.749496
1470	807.95		47157.7	212.2	1.63622	0.749294
1471	808.5		47202.6	212	1.68484	0.749081
1472	809.05		47246.2	213.5	1.70148	0.748877
1473	809.6		47289.3	211.8	1.65972	0.748664
1474	810.15		47333.6	211.8	1.5756	0.748452
1475	810.7		47380.2	211.3	1.54174	0.748243
1476	811.25		47427.9	211.8	1.58609	0.748031
1477	811.8		47474.3	211.5	1.54763	0.747834
1478	812.35		47521.8	211.7	1.56991	0.747622
1479	812.9		47568.7	211.4	1.53969	0.747409
1480	813.45		47616.4	211.2	1.55001	0.747196
1481	814		47663.9	212.2	1.6137	0.746976
1482	814.55		47709.6	212.2	1.61115	0.746763
1483	815.1		47755.3	211.3	1.53579	0.746499
1484	815.65		47803.3	210.8	1.49898	0.746287
1485	816.2		47852.4	211.8	1.54076	0.746027
1486	816.75		47900.3	211.2	1.48449	0.745815
1487	817.3		47949.9	209.5	1.34222	0.745567
1488	817.85		48004.9	210.5	1.38995	0.745355
1489	818.4		48058	210.4	1.39288	0.745128
1490	818.95		48111	209.9	1.36875	0.744915
1491	819.5		48164.9	210.5	1.41646	0.744712
1492	820.05		48217.1	211.1	1.45756	0.744499
1493	820.6		48267.8	210.4	1.46515	0.744282
1494	821.15		48318.2	211.6	1.52935	0.744069
1495	821.7		48366.5	211.6	1.56749	0.74382
1496	822.25		48413.7	211.6	1.56398	0.743608
1497	822.8		48461	211.1	1.50575	0.743372
1498	823.35		48510.1	211.4	1.53377	0.743159
1499	823.9		48558.4	209.9	1.35216	0.742926
1500	824.45		48613.1	210.9	1.46345	0.742714
1501	825		48663.7	211.5	1.53985	0.74251
1502	825.55		48711.8	210.1	1.37877	0.742297
1503	826.1		48765.6	210.3	1.38826	0.742085
1504	826.65		48819	211.3	1.53108	0.741855
1505	827.2		48867.4	211.4	1.54891	0.741643
1506	827.75		48915.3	211.9	1.57415	0.741404
1507	828.3		48962.4	210.9	1.48693	0.741192
1508	828.85		49012.3	210.8	1.4563	0.740956
1509	829.4		49063.3	210.8	1.44618	0.740743
1510	829.95		49114.6	210.3	1.42389	0.7405
1511	830.5		49166.8	211.1	1.46144	0.740271
1512	831.05		49217.6	210.4	1.4326	0.740058
1513	831.6		49269.5	210.8	1.42807	0.739849
1514	832.15		49321.5	210	1.39916	0.739636
1515	832.7		49374.7	211.1	1.45644	0.739424
1516	833.25		49425.8	210.5	1.44723	0.739216
1517	833.8		49477.2	211.3	1.51375	0.739004
1518	834.35		49526.3	211.7	1.5419	0.738792
1519	834.9		49574.6	210.9	1.49915	0.73858
1520	835.45		49624.3	211	1.52826	0.738369
1521	836		49673	212.3	1.56108	0.738157
1522	836.55		49720.8	210.7	1.50713	0.737929
1523	837.1		49770.2	210.8	1.4942	0.737717
1524	837.65		49820.1	212	1.5355	0.737512
1525	838.2		49868.7	210.8	1.49921	0.737299
1526	838.75		49918.4	210.9	1.45345	0.737113
1527	839.3		49969.8	210.2	1.43952	0.736901
1528	839.85		50021.6	211.4	1.51468	0.736691
1529	840.4		50070.9	211.8	1.57654	0.736479
1530	840.95		50118.3	211.5	1.56926	0.736271
1531	841.5		50165.9	211.9	1.60865	0.736059
1532	842.05		50212.3	211.4	1.54345	0.73588
1533	842.6		50260.8	210.9	1.47614	0.735668
1534	843.15		50311.4	210.9	1.48193	0.735458
1535	843.7		50361.9	211.4	1.53555	0.735246
1536	844.25		50410.6	211.4	1.57598	0.735046
1537	844.8		50458.1	212.8	1.65367	0.734834
1538	845.35		50503.3	211.2	1.56606	0.734622
1539	845.9		50551.1	211	1.47428	0.734425
1540	846.45		50601.9	210.3	1.48196	0.734213
1541	847		50652.5	212.2	1.55723	0.734009
1542	847.55		50700.6	211.4	1.55835	0.733797
1543	848.1		50748.7	210.9	1.52944	0.73361
1544	848.65		50797.7	211.8	1.54464	0.733398
1545	849.2		50846.3	210.9	1.51287	0.733184
1546	849.75		50895.8	211.1	1.51398	0.732972
1547	850.3		50945.4	211.7	1.57333	0.732768
1548	850.85		50993.1	211.7	1.57446	0.732556
1549	851.4		51040.8	210.6	1.45701	0.732367
1550	851.95		51092.3	211	1.49017	0.732155
1551	852.5		51142.8	211	1.49881	0.731969
1552	853.05		51192.9	211.2	1.5197	0.731757
1553	853.6		51242.3	211.5	1.55563	0.731591
1554	854.15		51290.7	211.4	1.55111	0.731379
1555	854.7		51339.2	211.6	1.57292	0.731199
1556	855.25		51387	211.2	1.54393	0.730987
1557	855.8		51435.7	211.8	1.59867	0.73081
1558	856.35		51482.8	212	1.64769	0.730599
1559	856.9		51528.5	212.4	1.62537	0.730387
1560	857.45		51574.8	211	1.58043	0.730238
1561	858		51622.5	211.8	1.55518	0.730026
1562	858.55		51670.9	211.1	1.57138	0.72987
1563	859.1		51718.9	212.3	1.62522	0.729658
1564	859.65		51765.2	211.8	1.63669	0.729535
1565	860.2		51811.3	212.9	1.75136	0.729323
1566	860.75		51854.4	211.6	1.60415	0.729186
1567	861.3		51901.4	212.2	1.66081	0.728974
1568	861.85		51946.8	212.5	1.76143	0.728762
1569	862.4		51989.7	213.8	1.78039	0.728588
1570	862.95		52032.1	212.1	1.76191	0.728376
1571	863.5		52074.9	213.2	1.77901	0.728211
1572	864.05		52117.4	212.2	1.66375	0.727999
1573	864.6		52162.8	211.2	1.54316	0.727852
1574	865.15		52211.7	212.1	1.62457	0.72764
1575	865.7		52258.3	211.6	1.60967	0.727485
1576	866.25		52305.2	212.1	1.62119	0.727274
1577	866.8		52351.9	211.7	1.63837	0.727062
1578	867.35		52398.1	212.4	1.68289	0.726923
1579	867.9		52443	212.8	1.69629	0.726711
1580	868.45		52487.6	211.4	1.61441	0.726581
1581	869		52534.5	212.5	1.68352	0.726369
1582	869.55		52579.5	212.1	1.66958	0.726236
1583	870.1		52624.9	213.1	1.75649	0.726025
1584	870.65		52668	211.7	1.66906	0.725813
1585	871.2		52713.4	212.3	1.7353	0.725649
1586	871.75		52757.1	213.8	1.79672	0.725437
1587	872.3		52799.3	212.3	1.75083	0.725322
1588	872.85		52842.6	212.3	1.68217	0.725111
1589	873.4		52887.7	211.8	1.61519	0.724995
1590	873.95		52934.6	211.6	1.59643	0.724783
1591	874.5		52982.2	212.1	1.72531	0.724685
1592	875.05		53026.2	214.2	1.83771	0.724474
1593	875.6		53067.5	212.7	1.80595	0.724262
1594	876.15		53109.5	212.3	1.73543	0.724175
1595	876.7		53153.3	213.4	1.82434	0.723963
1596	877.25		53194.9	213	1.82082	0.723855
1597	877.8		53236.6	213.4	1.85405	0.723643
1598	878.35		53277.6	213.3	1.8675	0.723432
1599	878.9		53318.4	213.5	1.87624	0.723287
1600	879.45		53358.9	213.5	1.89251	0.723075
1601	880		53399.1	213.5	1.87112	0.722901
1602	880.55		53439.7	213.2	1.79872	0.722689
1603	881.1		53482	212.3	1.7223	0.722545
1604	881.65		53526.2	212.2	1.68363	0.722333
1605	882.2		53571.5	212.4	1.66104	0.722197
1606	882.75		53617.3	211.3	1.5756	0.721985
1607	883.3		53665.7	211.6	1.58054	0.721774
1608	883.85		53713.9	211.8	1.61978	0.721621
1609	884.4		53760.9	212.9	1.77102	0.721409
1610	884.95		53804	212.2	1.71526	0.721244
1611	885.5		53848.4	212.9	1.72498	0.721033
1612	886.05		53892.7	211.9	1.69098	0.720902
1613	886.6		53937.8	212.2	1.65121	0.720691
1614	887.15		53984	211.8	1.63901	0.720555
1615	887.7		54030.6	212	1.623	0.720343
1616	888.25		54077.6	211.5	1.61269	0.720132
1617	888.8		54125	212.8	1.74052	0.719959
1618	889.35		54168.9	212.5	1.73028	0.719748
1619	889.9		54213	212.6	1.76188	0.719561
1620	890.45		54256.4	213	1.72691	0.71935
1621	891		54300.7	211.4	1.63368	0.719161
1622	891.55		54347.5	211.6	1.58129	0.71895
1623	892.1		54395.9	211.6	1.56998	0.718748
1624	892.65		54444.6	211.1	1.53279	0.718537
1625	893.2		54494.6	211.1	1.53391	0.718365
1626	893.75		54544.5	211.7	1.55325	0.718154
1627	894.3		54593.8	210.9	1.50065	0.717995
1628	894.85		54644.8	210.6	1.47006	0.717783
1629	895.4		54696.9	211.1	1.50095	0.717645
1630	895.95		54748	211.1	1.56445	0.717433
1631	896.5		54797	212.5	1.6604	0.717273
1632	897.05		54843.2	211.9	1.64816	0.717062
1633	897.6		54889.7	211.7	1.61769	0.7169
1634	898.15		54937.1	212.3	1.70021	0.716689
1635	898.7		54982.3	212.7	1.72527	0.716477
1636	899.25		55026.8	211.5	1.61344	0.716317
1637	899.8		55074.4	211.7	1.62513	0.716105
1638	900.35		55121.6	212.4	1.65024	0.715924
1639	900.9		55168.2	211.4	1.61302	0.715713
1640	901.45		55215.8	211.6	1.6084	0.715546
1641	902		55263.6	212.1	1.64313	0.715335
1642	902.55		55310.4	211.9	1.60299	0.715151
1643	903.1		55358.4	210.7	1.5291	0.71494
1644	903.65		55408.7	211.7	1.57353	0.714727
1645	904.2		55457.6	211.7	1.60832	0.714516
1646	904.75		55505.5	211.7	1.59791	0.714321
1647	905.3		55553.6	211.3	1.55381	0.71411
1648	905.85		55603.2	211.1	1.51735	0.7139
1649	906.4		55654	210.6	1.44801	0.713688
1650	906.95		55707.2	210.2	1.42398	0.713486
1651	907.5		55761.3	211.2	1.50333	0.713292
1652	908.05		55812.6	211.1	1.50637	0.71308
1653	908.6		55863.8	210.4	1.43114	0.712912
1654	909.15		55917.7	210.1	1.44192	0.712701
1655	909.7		55971.3	211.7	1.49619	0.712519
1656	910.25		56022.8	209.8	1.44605	0.712308
1657	910.8		56076.2	211.1	1.48294	0.712138
1658	911.35		56128.3	211.2	1.56134	0.711927
1659	911.9		56177.8	212	1.60686	0.711716
1660	912.45		56225.9	211.6	1.56746	0.71155
1661	913		56275.2	210.4	1.5106	0.711338
1662	913.55		56326.4	211.8	1.56874	0.711171
1663	914.1		56375.7	211.5	1.58919	0.710959
1664	914.65		56424.4	211.4	1.56519	0.710797
1665	915.2		56473.8	211.3	1.56825	0.710585
1666	915.75		56523.2	211.8	1.62155	0.710448
1667	916.3		56570.9	212	1.64007	0.710237
1668	916.85		56618.1	210.9	1.52421	0.710106
1669	917.4		56668.9	212	1.62979	0.709895
1670	917.95		56716.5	211.3	1.56033	0.709756
1671	918.5		56766.1	212.1	1.67844	0.709545
1672	919.05		56812.3	212.4	1.70082	0.709437
1673	919.6		56857.9	211.9	1.70198	0.709226
1674	920.15		56903.5	213.2	1.73499	0.709015
1675	920.7		56948.2	211.7	1.69366	0.708912
1676	921.25		56994	212.2	1.66774	0.708701
1677	921.8		57040.5	212.1	1.70852	0.708565
1678	922.35		57086	212.8	1.77149	0.708354
1679	922.9		57129.8	213.3	1.85562	0.708203
1680	923.45		57171.6	212.5	1.76321	0.707992
1681	924		57215.7	213.5	1.8551	0.707863
1682	924.55		57257.6	212.8	1.82638	0.707652
1683	925.1		57300.1	212.9	1.70481	0.707522
1684	925.65		57345.7	210.7	1.59064	0.707311
1685	926.2		57394.6	211.8	1.61797	0.7071
1686	926.75		57442.7	212.5	1.72472	0.706956
1687	927.3		57487.8	212.7	1.76363	0.706745
1688	927.85		57531.9	212.1	1.68247	0.706588
1689	928.4		57578.2	211.9	1.65355	0.706377
1690	928.95		57625.3	212.7	1.7797	0.706246
1691	929.5		57669	213.3	1.77796	0.706034
1692	930.05		57712.8	211.6	1.64921	0.705919
1693	930.6		57760.1	211.3	1.58428	0.705708
1694	931.15		57809.3	211.7	1.62525	0.70559
1695	931.7		57857.2	212.3	1.68272	0.705379
1696	932.25		57903.6	212.3	1.71978	0.705168
1697	932.8		57948.9	212.5	1.73646	0.705071
1698	933.35		57993.9	212.4	1.74344	0.704859
1699	933.9		58038.6	213.3	1.84156	0.70477
1700	934.45		58081	211.9	1.70496	0.704559
1701	935		58126.8	213.2	1.79835	0.704347
1702	935.55		58170.2	212.5	1.86061	0.70423
1703	936.1		58212.2	214.1	1.86082	0.704019
1704	936.65		58254.2	212.5	1.84163	0.703932
1705	937.2		58296.6	213.5	1.88258	0.703721
1706	937.75		58338.1	213.6	1.90122	0.703623
1707	938.3		58379.2	212.7	1.81021	0.703412
1708	938.85		58422.4	212.9	1.76084	0.703201
1709	939.4		58466.8	212.1	1.78922	0.703096
1710	939.95		58510.5	213.7	1.8788	0.702885
1711	940.5		58552.2	213.9	1.98573	0.702759
1712	941.05		58591.6	213.3	1.88116	0.702548
1713	941.6		58633.2	213.1	1.84347	0.702424
1714	942.15		58675.7	212.9	1.8602	0.702213
1715	942.7		58717.8	213.7	1.85651	0.702097
1716	943.25		58760	212.6	1.81196	0.701886
1717	943.8		58803.2	212.7	1.78197	0.701675
1718	944.35		58847.2	212.5	1.7461	0.70154
1719	944.9		58892.1	212.8	1.78234	0.701329
1720	945.45		58936.1	212.6	1.77862	0.701211
1721	946		58980.2	212.7	1.78758	0.700999
1722	946.55		59024.1	212.8	1.81311	0.700842
1723	947.1		59067.4	213.1	1.84253	0.70063
1724	947.65		59110	213.2	1.84078	0.700503
1725	948.2		59152.7	211.5	1.60858	0.700291
1726	948.75		59201.5	214	1.95709	0.70008
1727	949.3		59241.6	212.4	1.76915	0.699929
1728	949.85		59286.1	212.3	1.67651	0.699718
1729	950.4		59332.9	211.3	1.64048	0.699558
1730	950.95		59380.9	212.5	1.74623	0.699346
1731	951.5		59425.9	213.7	1.8304	0.699202
1732	952.05		59468.9	212.3	1.76221	0.69899
1733	952.6		59513.5	212	1.68512	0.698855
1734	953.15		59560.2	212.4	1.72245	0.698644
1735	953.7		59605.9	212.7	1.76663	0.698475
1736	954.25		59650.5	211.4	1.59937	0.698264
1737	954.8		59699.7	211.7	1.65047	0.698052
1738	955.35		59747.5	213.2	1.80725	0.697879
1739	955.9		59791.1	212.7	1.80058	0.697668
1740	956.45		59834.9	212.6	1.7851	0.697472
1741	957		59879	212.8	1.73533	0.697261
1742	957.55		59924.5	211.3	1.64728	0.69708
1743	958.1		59972.4	212.2	1.66018	0.696869
1744	958.65		60019.9	211.8	1.65345	0.696672
1745	959.2		60067.7	211.9	1.64281	0.696461
1746	959.75		60115.8	211.3	1.57716	0.696282
1747	960.3		60165.8	211.2	1.56452	0.69607
1748	960.85		60216.3	211.7	1.61475	0.695906
1749	961.4		60265.3	211.9	1.65024	0.695694
1750	961.95		60313.2	211.1	1.54425	0.695517
1751	962.5		60364.4	211.6	1.60925	0.695305
1752	963.05		60413.6	212.3	1.71351	0.695104
1753	963.6		60459.7	211.3	1.58002	0.694893
1754	964.15		60509.8	211.9	1.65486	0.694701
1755	964.7		60557.7	212.5	1.75127	0.694489
1756	965.25		60602.9	212.8	1.7367	0.694291
1757	965.8		60648.5	211.4	1.63364	0.69408
1758	966.35		60697	211.7	1.59934	0.693881
1759	966.9		60746.6	211.3	1.57388	0.69367
1760	967.45		60796.9	211.1	1.56908	0.693471
1761	968		60847.5	211.9	1.63516	0.69326
1762	968.55		60896	212.1	1.65694	0.69305
1763	969.1		60943.9	211.5	1.59012	0.692838
1764	969.65		60993.8	210.8	1.5666	0.692619
1765	970.2		61044.5	212.2	1.61697	0.692407
1766	970.75		61093.6	211.5	1.62793	0.692183
1767	971.3		61142.5	211.7	1.61229	0.691971
1768	971.85		61191.8	211.5	1.59665	0.691751
1769	972.4		61241.6	211.3	1.56916	0.691539
1770	972.95		61292.2	211.2	1.56928	0.691312
1771	973.5		61342.9	211.6	1.55559	0.691101
1772	974.05		61394.1	210.5	1.5034	0.690872
1773	974.6		61447	211	1.52621	0.690621
1774	975.15		61499.2	211.6	1.57665	0.69041
1775	975.7		61549.8	211.1	1.5511	0.690141
1776	976.25		61601.1	210.8	1.51665	0.68993
1777	976.8		61653.7	211.1	1.53453	0.689673
1778	977.35		61705.7	211.3	1.5534	0.689461
1779	977.9		61757	211	1.52586	0.689207
1780	978.45		61809.3	210.8	1.49039	0.688995
1781	979		61862.9	210.2	1.42919	0.688725
1782	979.55		61918.8	210.4	1.43324	0.688448
1783	980.1		61974.5	209.6	1.35912	0.688236
1784	980.65		62033.3	210.4	1.43441	0.68798
1785	981.2		62089	210.6	1.46615	0.687768
1786	981.75		62143.6	210.5	1.45932	0.687482
1787	982.3		62198.4	210.4	1.43368	0.687203
1788	982.85		62254.2	210	1.3922	0.686991
1789	983.4		62311.7	209.7	1.36059	0.686706
1790	983.95		62370.6	210	1.39632	0.686494
1791	984.5		62428	211.3	1.54686	0.686196
1792	985.05		62479.8	209.7	1.35983	0.685984
1793	985.6		62538.7	209.7	1.35	0.685688
1794	986.15		62598.2	209.7	1.36197	0.68537
1795	986.7		62657.1	210	1.39276	0.685158
1796	987.25		62714.7	210.3	1.41861	0.684852
1797	987.8		62771.3	209.4	1.31956	0.684548
1798	988.35		62832.2	209.1	1.2988	0.684336
1799	988.9		62894.1	210	1.37028	0.684032
1800	989.45		62952.8	210.2	1.35746	0.68382
1801	990		63012	208.1	1.19876	0.68353
1802	990.55		63079.1	209.3	1.30006	0.683281
1803	991.1		63141.1	209.4	1.30112	0.683069
1804	991.65		63202.9	209.2	1.29722	0.682822
1805	992.2		63265	209.6	1.32904	0.682609
1806	992.75		63325.7	209.3	1.30231	0.682342
1807	993.3		63387.5	209.5	1.32918	0.682129
1808	993.85		63448.2	209.7	1.35902	0.681862
1809	994.4		63507.6	210.1	1.43155	0.68165
1810	994.95		63563.9	211.7	1.58042	0.681401
1811	995.5		63615	211.8	1.59142	0.681108
1812	996.05		63665.7	210.2	1.49827	0.680896
1813	996.6		63719.7	211.9	1.57575	0.680596
1814	997.15		63770.9	209.7	1.39519	0.680384
1815	997.7		63828.9	210.7	1.47768	0.680073
1816	998.25		63883.6	210.7	1.49662	0.679773
1817	998.8		63937.7	211.4	1.57413	0.679561
1818	999.35		63989.1	211.1	1.5226	0.679257
1819	999.9		64042.3	210	1.39952	0.679045
1820	1000.45		64100.1	209.5	1.35587	0.67874
1821	1001		64159.9	210.2	1.38575	0.678427
1822	1001.55		64218.4	209.8	1.36594	0.678215
1823	1002.1		64277.8	209.2	1.30635	0.677898
1824	1002.65		64339.9	209.8	1.37402	0.677686
1825	1003.2		64398.9	210.3	1.40391	0.67737
1826	1003.75		64456.8	209.7	1.3652	0.677071
1827	1004.3		64516.3	209.4	1.33344	0.676858
1828	1004.85		64577.2	210.1	1.39814	0.676559
1829	1005.4		64635.4	209.3	1.3246	0.676346
1830	1005.95		64696.8	210.2	1.3744	0.676029
1831	1006.5		64756	209.2	1.32372	0.675711
1832	1007.05		64817.4	209.5	1.32577	0.675499
1833	1007.6		64878.9	209.7	1.3527	0.675172
1834	1008.15		64939.1	209.7	1.37365	0.674959
1835	1008.7		64998.4	210.8	1.47022	0.674633
1836	1009.25		65053.9	210.7	1.43248	0.674302
1837	1009.8		65110.8	208.8	1.31012	0.674089
1838	1010.35		65173.1	210.2	1.38384	0.673764
1839	1010.9		65232.1	209.5	1.33711	0.673424
1840	1011.45		65293.1	209.9	1.35708	0.673212
1841	1012		65353.3	209.4	1.3183	0.672879
1842	1012.55		65415.3	209.1	1.29345	0.672666
1843	1013.1		65478.6	209.7	1.3443	0.672323
1844	1013.65		65539.4	209	1.29056	0.671979
1845	1014.2		65602.8	210.1	1.35935	0.671767
1846	1014.75		65663.1	209.5	1.33748	0.671418
1847	1015.3		65724.3	209.2	1.29071	0.671081
1848	1015.85		65787.8	208.9	1.27581	0.670868
1849	1016.4		65852.1	209.7	1.32668	0.670537
1850	1016.95		65913.9	209.2	1.30181	0.670223
1851	1017.5		65976.9	208.9	1.26298	0.670011
1852	1018.05		66041.9	209	1.27599	0.669668
1853	1018.6		66106.3	209.3	1.287	0.669455
1854	1019.15		66170.1	208.7	1.24417	0.669128
1855	1019.7		66236.2	209.3	1.30503	0.668788
1856	1020.25		66299.2	209.4	1.32003	0.668575
1857	1020.8		66361.5	209.7	1.33802	0.668243
1858	1021.35		66423	209.5	1.33308	0.667895
1859	1021.9		66484.8	210.6	1.45676	0.667682
1860	1022.45		66541.4	208.8	1.27533	0.667342
1861	1023		66606	209.8	1.34918	0.666992
1862	1023.55		66667.1	210	1.37814	0.666779
1863	1024.1		66727	209.3	1.31236	0.666434
1864	1024.65		66789.9	209.3	1.3144	0.666221
1865	1025.2		66852.7	210	1.36033	0.66588
1866	1025.75		66913.4	209.5	1.32745	0.665539
1867	1026.3		66975.6	208.9	1.26563	0.665326
1868	1026.85		67040.9	209.7	1.33152	0.665004
1869	1027.4		67103.1	209.1	1.29165	0.664657
1870	1027.95		67167.1	209.2	1.28869	0.664445
1871	1028.5		67231.4	209	1.28074	0.664125
1872	1029.05		67296	209.6	1.33368	0.663912
1873	1029.6		67358.1	209.6	1.32673	0.663582
1874	1030.15		67420.6	209.1	1.28983	0.663252
1875	1030.7		67484.9	209.7	1.36174	0.66304
1876	1031.25		67545.8	210.6	1.43265	0.662686
1877	1031.8		67603.7	209.3	1.33786	0.662326
1878	1032.35		67665.8	209.3	1.30595	0.662113
1879	1032.9		67729.4	209.1	1.30798	0.661783
1880	1033.45		67793	211.3	1.51567	0.66157
1881	1034		67847.8	209.6	1.37295	0.661259
1882	1034.55		67908.4	209.8	1.37498	0.660951
1883	1035.1		67968.9	210.2	1.39499	0.660738
1884	1035.65		68028.6	209.4	1.32412	0.660423
1885	1036.2		68091.5	208.8	1.25024	0.660211
1886	1036.75		68158.1	208.9	1.26026	0.659883
1887	1037.3		68224.2	209.1	1.27927	0.659532
1888	1037.85		68289.4	210.6	1.47706	0.659319
1889	1038.4		68345.9	210.4	1.45313	0.65897
1890	1038.95		68403.4	210.5	1.47014	0.658608
1891	1039.5		68460.2	210.8	1.48216	0.658395
1892	1040.05		68516.5	210.3	1.45723	0.658035
1893	1040.6		68573.9	210.7	1.46126	0.657687
1894	1041.15		68631.1	209.8	1.38436	0.657474
1895	1041.7		68691.5	210.3	1.40338	0.657123
1896	1042.25		68751.2	209	1.30049	0.65691
1897	1042.8		68815.6	209.5	1.31351	0.656588
1898	1043.35		68879.3	209.5	1.32252	0.656258
1899	1043.9		68942.7	208.7	1.25559	0.656045
1900	1044.45		69009.5	209.6	1.29959	0.65572
1901	1045		69074	208.7	1.25464	0.655507
1902	1045.55		69140.9	209.7	1.33661	0.655212
1903	1046.1		69203.7	209.2	1.30465	0.654909
1904	1046.65		69268.1	209.4	1.31367	0.654697
1905	1047.2		69332	209.5	1.34667	0.654382
1906	1047.75		69394.4	211.1	1.50262	0.654169
1907	1048.3		69450.4	209.9	1.3957	0.653865
1908	1048.85		69510.6	209.6	1.35973	0.653653
1909	1049.4		69572.5	210	1.40974	0.653353
1910	1049.95		69632.2	211.5	1.5737	0.653078
1911	1050.5		69685.8	210.8	1.51174	0.652865
1912	1051.05		69741.5	211.1	1.53776	0.652584
1913	1051.6		69796.3	210.4	1.45681	0.652371
1914	1052.15		69854.2	210.2	1.44383	0.652103
1915	1052.7		69912.6	210.9	1.48884	0.65189
1916	1053.25		69969.2	210.7	1.50386	0.651649
1917	1053.8		70025.4	211	1.52287	0.651436
1918	1054.35		70080.8	210.7	1.4969	0.6512
1919	1054.9		70137.2	211.6	1.6139	0.650987
1920	1055.45		70189.6	211.7	1.63492	0.650767
1921	1056		70241.3	210.8	1.53294	0.650554
1922	1056.55		70296.4	212.1	1.66595	0.650326
1923	1057.1		70347.2	211.7	1.64497	0.650113
1924	1057.65		70398.6	211.8	1.65099	0.649858
1925	1058.2		70449.9	212	1.70601	0.649645
1926	1058.75		70499.5	213.2	1.82703	0.649361
1927	1059.3		70545.9	212.3	1.76004	0.649148
1928	1059.85		70594	212.7	1.80406	0.648884
1929	1060.4		70641	212.7	1.81108	0.648671
1930	1060.95		70687.8	213.3	1.8951	0.648408
1931	1061.5		70732.6	212.9	1.83911	0.648195
1932	1062.05		70778.7	212.8	1.81012	0.647935
1933	1062.6		70825.6	212.4	1.78713	0.647722
1934	1063.15		70873.1	212.9	1.73513	0.647431
1935	1063.7		70922.1	210.6	1.56411	0.647218
1936	1064.25		70976.4	211.1	1.57912	0.646933
1937	1064.8		71030.2	213.1	1.76516	0.64672
1938	1065.35		71078.4	211.3	1.63414	0.646456
1939	1065.9		71130.5	211.9	1.66715	0.646243
1940	1066.45		71181.5	212.1	1.71016	0.645959
1941	1067		71231.3	212.3	1.73717	0.645746
1942	1067.55		71280.4	212.3	1.71417	0.645457
1943	1068.1		71330.1	211.3	1.59814	0.645169
1944	1068.65		71383.4	211.2	1.56114	0.644957
1945	1069.2		71438	211.6	1.61815	0.644657
1946	1069.75		71490.7	211.5	1.61714	0.644444
1947	1070.3		71543.5	212.5	1.74617	0.644132
1948	1070.85		71592.4	211.6	1.63614	0.643919
1949	1071.4		71644.6	211.5	1.61613	0.64361
1950	1071.95		71697.5	211.7	1.62613	0.643397
1951	1072.5		71750.1	211.4	1.59712	0.643075
1952	1073.05		71803.6	211.5	1.60811	0.64273
1953	1073.6		71856.8	211.7	1.61911	0.642517
1954	1074.15		71909.7	211.3	1.58109	0.642183
1955	1074.7		71963.9	211.1	1.56008	0.641845
1956	1075.25		72018.8	211.4	1.55107	0.641633
1957	1075.8		72074.1	210.3	1.47805	0.641309
1958	1076.35		72132.1	211.3	1.55705	0.641096
1959	1076.9		72187.2	210.8	1.50403	0.640779
1960	1077.45		72244.2	211	1.51502	0.640472
1961	1078		72300.9	210.1	1.40801	0.640259
1962	1078.55		72362.9	209.4	1.36	0.639957
1963	1079.1		72426.1	210.4	1.428	0.639745
1964	1079.65		72486.3	210.2	1.419	0.63946
1965	1080.2		72546.9	210	1.401	0.639247
1966	1080.75		72608.3	210.1	1.424	0.638963
1967	1081.3		72668.7	210.7	1.471	0.63875
1968	1081.85		72727.3	210.7	1.491	0.638464
1969	1082.4		72785	210.7	1.49	0.638251
1970	1082.95		72842.9	210.9	1.523	0.637966
1971	1083.5		72899.5	211.1	1.537	0.637691
1972	1084.05		72955.6	210.7	1.531	0.637479
1973	1084.6		73012	211.7	1.594	0.637201
1974	1085.15		73066.1	211.4	1.619	0.636988
1975	1085.7		73119.4	211.8	1.642	0.636724
1976	1086.25		73172	211.9	1.628	0.636511
1977	1086.8		73225.1	210.8	1.559	0.636242
1978	1087.35		73280.5	212.1	1.658	0.636029
1979	1087.9		73332.7	211.2	1.586	0.635802
1980	1088.45		73387.3	211.8	1.655	0.63559
1981	1089		73439.5	210.9	1.547	0.635357
1982	1089.55		73495.5	212.8	1.762	0.635145
1983	1090.1		73544.6	211.4	1.619	0.634917
1984	1090.65		73598.1	212.1	1.683	0.634705
1985	1091.2		73649.6	212.1	1.7	0.634485
1986	1091.75		73700.6	212.2	1.699	0.634272
1987	1092.3		73751.6	211.7	1.665	0.634043
1988	1092.85		73803.7	212.3	1.711	0.63383
[truncated: 3,938 more rows]

## Sheet: supp
F. Parrenin, May, 11, 2007.
Some supplements regarding the EDC modelling.
column 1:	Bag number. It refers to the EDC96 bag numbers above 789 m depth and to the EDC99 bag numbers below 789 m depth.
column 2:	Ice equivalent depth for the top of the bag (the firn being compressed into pure ice).
column 3:	The purely modelled time scale for the ice in yr before 1950 AD (b1950). That is to say, EDC3 before accumulation (top part) and thinning (bottom part) corrections.
column 4:	The purely modelled accumulation rate, in cm of ice-equivalent per year (cm-ie/yr). Before correction in the top part for EDC3.
column 5:	The purely modelled total thinning of ice (or thinning function). Before correction in the bottom part for EDC3.
column 6:	The variations in bedrock elevation at EDC (m).
column 7:	The variations in surface elevation at EDC (m).
column 8:	Deuterium content of the ice (EDC96 above 788 m and EDC99 below).
column 9:	Deuterium content of the ice, corrected from variations in source isotopic composition (in per mil).
#bagEDC96+99	ie-depthEDC96+99	age-model-top-b1950	acc-model	thin-mid-model	Delta-bed-elevation (m)	Delta-surf-elevation (m)	deut	deut_cor
1	0	-50	3.099	1.00014	0	0	-390.9	-390.96
2	0.2	-43.48	3.099	1.00006	0.0108513	-0.0301682	-390.9	-390.96
3	0.39	-37.37	3.099	0.999985	0.0210202	-0.0584392	-390.9	-390.96
4	0.57	-31.53	3.099	0.999915	0.0307398	-0.085461	-390.9	-390.96
5	0.79	-24.48	3.099	0.999829	0.0424732	-0.118081	-390.9	-390.96
6	1	-17.7	3.099	0.999747	0.0537572	-0.149453	-390.9	-390.96
7	1.21	-10.8	3.099	0.999664	0.0652409	-0.181379	-390.9	-390.96
8	1.45	-3.08	3.112	0.99957	0.0780894	-0.2171	-390.9	-390.96
9	1.72	5.34	3.119	0.999468	0.0921029	-0.256059	-390.9	-390.96
10	1.97	13.53	3.119	0.999368	0.105734	-0.293954	-390.9	-390.96
11	2.24	22.3	3.119	0.999261	0.12033	-0.334533	-390.9	-390.96
12	2.5	30.38	3.119	0.999163	0.133777	-0.37192	-390.9	-390.96
13	2.74	38.32	3.119	0.999066	0.146992	-0.408658	-390.9	-390.96
14	3	46.48	3.08	0.999143	0.160573	-0.446415	-385.1	-385.17
15	3.25	54.77	3.052	0.999044	0.174371	-0.476371	-377.8	-377.87
16	3.53	63.79	3.052	0.998936	0.189386	-0.502219	-394.1	-394.16
17	3.79	72.48	3.052	0.998833	0.203851	-0.527122	-398.7	-398.76
18	4.05	80.87	3.052	0.998733	0.217817	-0.551165	-395.9	-395.96
19	4.31	89.32	3.052	0.998632	0.231883	-0.575379	-395.9	-395.96
20	4.58	98.17	2.842	0.998527	0.246615	-0.60074	-399.3	-399.36
21	4.85	107.77	2.794	0.99842	0.262595	-0.628251	-391.4	-391.47
22	5.1	116.91	2.794	0.998321	0.27781	-0.654443	-399.5	-399.56
23	5.37	126.41	2.794	0.998217	0.293624	-0.681667	-402.9	-402.96
24	5.65	136.42	2.794	0.998108	0.310286	-0.710352	-393.9	-393.97
25	5.92	146.33	2.81	0.998142	0.326783	-0.738751	-398.6	-398.67
26	6.2	156.23	2.819	0.998034	0.343364	-0.761579	-389.8	-389.87
27	6.48	166.1	2.819	0.997925	0.359954	-0.781084	-394.5	-394.57
28	6.76	175.99	2.819	0.997817	0.376578	-0.800628	-400.5	-400.57
29	7.03	185.78	2.819	0.997709	0.393034	-0.819975	-403.6	-403.67
30	7.31	195.62	2.833	0.997601	0.409575	-0.83942	-393.1	-393.17
31	7.59	205.65	2.844	0.99749	0.426434	-0.859241	-410.9	-410.97
32	7.89	215.96	2.844	0.997376	0.443764	-0.879615	-393.6	-393.67
33	8.18	226.29	2.844	0.997261	0.461128	-0.900029	-391.1	-391.17
34	8.48	236.86	2.844	0.997144	0.478895	-0.920917	-391.9	-391.97
35	8.78	247.44	2.768	0.997136	0.496679	-0.941825	-396.3	-396.37
36	9.08	258.41	2.745	0.997018	0.515327	-0.956137	-397	-397.07
37	9.38	269.38	2.745	0.996901	0.534038	-0.968206	-404.7	-404.77
38	9.69	280.78	2.745	0.996779	0.553483	-0.980749	-398.2	-398.27
39	10.01	292.19	2.738	0.996657	0.572944	-0.993303	-395.2	-395.27
40	10.32	303.62	2.722	0.996535	0.59244	-1.00588	-403.5	-403.57
41	10.63	315.2	2.722	0.996412	0.612192	-1.01862	-398.6	-398.67
42	10.95	326.81	2.722	0.996289	0.631995	-1.03139	-399.7	-399.77
43	11.26	338.52	2.719	0.996165	0.651968	-1.04428	-396	-396.07
44	11.58	350.34	2.623	0.996136	0.672141	-1.05715	-400.2	-400.27
45	11.91	362.64	2.623	0.99601	0.693531	-1.06611	-401.6	-401.67
46	12.23	375.13	2.623	0.995883	0.715251	-1.0752	-405.4	-405.47
47	12.56	387.63	2.624	0.995755	0.736989	-1.0843	-399	-399.07
48	12.89	400.13	2.758	0.995628	0.758727	-1.0934	-396.9	-396.97
49	13.21	412.03	2.758	0.9955	0.779422	-1.10207	-394.9	-394.97
50	13.54	424.08	2.758	0.995371	0.800377	-1.11084	-406.6	-406.67
51	13.88	436.23	2.758	0.99524	0.821506	-1.11969	-395.2	-395.27
52	14.21	448.48	2.773	0.995232	0.842809	-1.12861	-395.3	-395.37
53	14.55	460.79	2.775	0.995099	0.864622	-1.14466	-399.5	-399.57
54	14.89	473.1	2.775	0.994966	0.886492	-1.16171	-401	-401.07
55	15.23	485.41	2.775	0.994834	0.908362	-1.17876	-393.6	-393.67
56	15.58	497.87	2.736	0.994699	0.930499	-1.19602	-410.4	-410.47
57	15.92	510.58	2.729	0.994564	0.95308	-1.21363	-401.3	-401.37
58	16.27	523.32	2.729	0.994429	0.975714	-1.23127	-398.3	-398.37
59	16.61	536.04	2.729	0.994294	0.998312	-1.24889	-388.5	-388.57
60	16.96	548.83	2.858	0.994348	1.02103	-1.26661	-391.9	-391.97
61	17.31	561.06	2.871	0.994212	1.04312	-1.30221	-400.8	-400.87
62	17.66	573.31	2.871	0.994076	1.06529	-1.33985	-387.7	-387.78
63	18.01	585.57	2.871	0.993939	1.08747	-1.37751	-401.4	-401.47
64	18.36	597.98	2.958	0.993801	1.10992	-1.41564	-401	-401.07
65	18.72	610.06	2.974	0.993662	1.13177	-1.45275	-387.3	-387.38
66	19.07	622.19	2.974	0.993522	1.15372	-1.49002	-390.2	-390.28
67	19.43	634.35	2.974	0.993381	1.17572	-1.52738	-394.5	-394.58
68	19.8	646.67	2.75	0.993334	1.19801	-1.56523	-401.9	-401.98
69	20.16	660.05	2.683	0.993191	1.2224	-1.58157	-399.8	-399.88
70	20.53	673.77	2.683	0.993048	1.24747	-1.5899	-399.9	-399.98
71	20.89	687.42	2.676	0.992906	1.27241	-1.5982	-399.1	-399.18
72	21.26	701.06	2.604	0.992765	1.29733	-1.60648	-401.9	-401.98
73	21.62	715.32	2.604	0.992621	1.32339	-1.61515	-404.8	-404.88
74	22	729.71	2.604	0.992475	1.34968	-1.62389	-401.6	-401.68
75	22.37	744.09	2.754	0.992552	1.37596	-1.63263	-396.7	-396.78
76	22.74	757.71	2.872	0.992406	1.40116	-1.66594	-397.1	-397.18
77	23.12	770.9	2.872	0.99226	1.4258	-1.71677	-394.2	-394.28
78	23.49	784.12	2.872	0.992113	1.4505	-1.76772	-395.9	-395.98
79	23.87	797.5	3.074	0.991964	1.4755	-1.81929	-392.7	-392.78
80	24.25	809.99	3.124	0.991815	1.49883	-1.86743	-390.4	-390.48
81	24.63	822.23	3.124	0.991667	1.5217	-1.9146	-389	-389.08
82	25.01	834.51	3.124	0.991518	1.54464	-1.96193	-387	-387.08
83	25.4	846.91	2.862	0.991504	1.5678	-2.00972	-402.3	-402.38
84	25.78	860.42	2.793	0.991355	1.59317	-2.03868	-392.5	-392.58
85	26.16	874.26	2.793	0.991205	1.6192	-2.06134	-404.6	-404.68
86	26.55	888.25	2.773	0.991054	1.64551	-2.08424	-390.5	-390.58
87	26.94	902.42	2.682	0.990902	1.67216	-2.10743	-402.3	-402.38
88	27.33	917.17	2.682	0.990749	1.6999	-2.13158	-400.1	-400.18
89	27.73	931.9	2.682	0.990596	1.7276	-2.15569	-399.4	-399.48
90	28.11	946.57	2.762	0.990612	1.75519	-2.1797	-400.6	-400.68
91	28.51	960.96	2.787	0.990458	1.78262	-2.21208	-393.8	-393.89
92	28.91	975.39	2.787	0.990303	1.81023	-2.24731	-398.5	-398.59
93	29.31	989.86	2.811	0.990147	1.83792	-2.28264	-398.7	-398.79
94	29.71	1004.21	2.868	0.989991	1.86538	-2.31768	-401.8	-401.89
95	30.1	1018.26	2.868	0.989835	1.89227	-2.35198	-395.2	-395.29
96	30.51	1032.42	2.868	0.989678	1.91936	-2.38656	-390.1	-390.19
97	30.91	1046.71	2.81	0.989699	1.94671	-2.42145	-393.9	-393.99
98	31.31	1061.14	2.794	0.989542	1.97462	-2.45953	-400.6	-400.69
99	31.71	1075.62	2.794	0.989386	2.00271	-2.49857	-400.9	-400.99
100	32.12	1090.31	2.825	0.989227	2.03121	-2.53819	-391.7	-391.79
101	32.53	1104.95	2.883	0.989068	2.05961	-2.57767	-399.3	-399.39
102	32.95	1119.58	2.883	0.988905	2.088	-2.61712	-386.7	-386.79
103	33.36	1134.05	2.883	0.988744	2.11607	-2.65615	-401.5	-401.59
104	33.77	1148.4	3.018	0.988817	2.14391	-2.69485	-398.1	-398.19
105	34.18	1162.32	3.034	0.988655	2.17122	-2.74939	-390.4	-390.49
106	34.6	1176.22	3.034	0.988492	2.19853	-2.80605	-389.8	-389.89
107	35.01	1189.85	3	0.988333	2.22531	-2.86162	-390.7	-390.79
108	35.42	1203.8	2.914	0.988171	2.25272	-2.91849	-399.3	-399.39
109	35.84	1218.29	2.914	0.988008	2.2812	-2.97757	-392.5	-392.59
110	36.26	1232.98	2.914	0.987843	2.31006	-3.03745	-393.8	-393.89
111	36.69	1247.7	2.895	0.9879	2.33898	-3.09746	-394.4	-394.49
112	37.11	1262.51	2.891	0.987735	2.36825	-3.15423	-397	-397.09
113	37.53	1277.27	2.891	0.98757	2.39744	-3.21015	-397.8	-397.9
114	37.96	1292.14	2.936	0.987404	2.42685	-3.26648	-388.6	-388.7
115	38.38	1306.9	2.985	0.987237	2.45604	-3.3224	-394.7	-394.8
116	38.82	1321.58	2.985	0.987069	2.48508	-3.37801	-390.6	-390.7
117	39.25	1336.23	2.988	0.9869	2.51405	-3.43351	-397	-397.1
118	39.67	1350.69	3.04	0.986942	2.54266	-3.48803	-386.6	-386.7
119	40.1	1364.94	3.04	0.986775	2.57107	-3.53677	-390.6	-390.7
120	40.53	1379.22	3.04	0.986608	2.59954	-3.58561	-397	-397.1
121	40.96	1393.67	2.854	0.986439	2.62835	-3.63503	-396.1	-396.2
122	41.4	1409.17	2.737	0.986269	2.65925	-3.68804	-398.9	-399
123	41.84	1425.52	2.737	0.986096	2.69185	-3.74396	-400.2	-400.3
124	42.28	1441.7	2.782	0.985926	2.72411	-3.79929	-398.7	-398.8
125	42.71	1457.57	2.831	0.985945	2.7559	-3.84976	-389.7	-389.8
126	43.15	1473.14	2.831	0.985776	2.78724	-3.89518	-401.6	-401.7
127	43.59	1488.89	2.837	0.985605	2.81895	-3.94112	-397.9	-398
128	44.03	1504.73	2.85	0.985432	2.85085	-3.98732	-399.2	-399.3
129	44.47	1520.4	2.85	0.98526	2.88239	-4.03303	-397.6	-397.7
130	44.91	1536.2	2.845	0.985087	2.9142	-4.07912	-390.5	-390.61
131	45.36	1552.11	2.817	0.985086	2.94629	-4.12459	-401.5	-401.6
132	45.8	1568.04	2.817	0.984914	2.97875	-4.16404	-395.7	-395.81
133	46.25	1584.07	2.815	0.98474	3.01142	-4.20374	-394.5	-394.61
134	46.7	1600.3	2.747	0.984565	3.0445	-4.24393	-402.9	-403.01
135	47.15	1617.1	2.747	0.984387	3.07874	-4.28554	-401	-401.11
136	47.6	1633.86	2.75	0.98421	3.1129	-4.32704	-391.5	-391.61
137	48.06	1650.54	2.819	0.984209	3.14691	-4.36835	-403.4	-403.51
138	48.51	1666.74	2.819	0.984034	3.1804	-4.40857	-393.4	-393.51
139	48.95	1682.75	2.819	0.98386	3.21349	-4.44832	-393.8	-393.91
140	49.4	1698.88	2.736	0.983686	3.24684	-4.48837	-400.8	-400.91
141	49.87	1716.32	2.731	0.983503	3.28289	-4.53167	-399.3	-399.41
142	50.33	1733.61	2.734	0.983322	3.31864	-4.5746	-396.6	-396.71
143	50.79	1750.68	2.799	0.983313	3.35395	-4.61689	-395.3	-395.41
144	51.24	1767.17	2.799	0.983136	3.38853	-4.65574	-392.6	-392.71
145	51.7	1783.79	2.795	0.982958	3.42339	-4.69489	-404.4	-404.51
146	52.16	1800.56	2.709	0.982778	3.45856	-4.7344	-394.4	-394.51
147	52.63	1818.15	2.709	0.982595	3.49545	-4.77584	-402.2	-402.31
148	53.09	1835.44	2.744	0.982416	3.53172	-4.81657	-401.9	-402.01
149	53.55	1852.48	2.93	0.982459	3.56753	-4.86003	-393.8	-393.92
150	54.01	1868.61	2.93	0.982278	3.60188	-4.91958	-402.3	-402.42
151	54.48	1884.81	2.922	0.982097	3.63637	-4.97939	-385.1	-385.22
152	54.95	1901.06	2.846	0.981915	3.67097	-5.03938	-395.9	-396.02
153	55.41	1917.54	2.846	0.981735	3.70606	-5.10022	-395.8	-395.92
154	55.86	1933.91	2.842	0.981557	3.74092	-5.16066	-398.2	-398.32
155	56.34	1950.81	2.793	0.981549	3.77692	-5.22205	-394.8	-394.92
156	56.81	1968.06	2.793	0.981365	3.814	-5.26444	-397.7	-397.82
157	57.28	1985.32	2.777	0.98118	3.85111	-5.30686	-400.3	-400.42
158	57.75	2002.5	2.694	0.980998	3.88804	-5.34908	-402.4	-402.52
159	58.22	2020.42	2.694	0.980813	3.92657	-5.39312	-396	-396.12
160	58.7	2038.39	2.759	0.980628	3.9652	-5.43728	-401.4	-401.52
161	59.17	2055.95	2.878	0.980653	4.00314	-5.48558	-386.1	-386.23
162	59.65	2072.9	2.878	0.980466	4.04013	-5.54189	-400.1	-400.22
163	60.13	2089.86	2.846	0.98028	4.07714	-5.59824	-400.3	-400.42
164	60.61	2106.92	2.802	0.980094	4.11437	-5.65492	-393.2	-393.33
165	61.08	2124.25	2.802	0.979909	4.15218	-5.7125	-399.7	-399.83
166	61.56	2141.66	2.742	0.979722	4.19018	-5.77034	-397.9	-398.03
167	62.04	2159.68	2.695	0.979743	4.22974	-5.82988	-402	-402.13
168	62.53	2178.01	2.695	0.979555	4.27021	-5.89017	-398.7	-398.83
169	63.01	2196.33	2.885	0.979366	4.31065	-5.95042	-398.6	-398.73
170	63.49	2213.39	2.934	0.979178	4.34831	-6.00653	-394.6	-394.73
171	63.98	2230.16	2.934	0.97899	4.38532	-6.06169	-390.6	-390.73
172	64.46	2247.01	2.882	0.978965	4.42252	-6.11711	-394	-394.13
173	64.95	2264.5	2.873	0.978773	4.46151	-6.1568	-397.9	-398.03
174	65.45	2282.06	2.873	0.97858	4.50073	-6.19297	-394.8	-394.93
175	65.94	2299.57	2.485	0.978389	4.53984	-6.22903	-408.2	-408.33
176	66.43	2319.66	2.484	0.978198	4.58472	-6.27041	-404.3	-404.43
177	66.92	2339.76	2.557	0.978008	4.62962	-6.31181	-399.6	-399.74
178	67.41	2359.34	2.634	0.977961	4.67371	-6.34692	-400.8	-400.94
179	67.89	2378.31	2.634	0.97777	4.7168	-6.37542	-401.5	-401.64
180	68.38	2397.24	2.62	0.97758	4.75981	-6.40385	-407.7	-407.84
181	68.87	2416.36	2.618	0.977389	4.80324	-6.43256	-400.5	-400.64
182	69.36	2435.52	2.651	0.977198	4.84677	-6.46134	-395.8	-395.94
183	69.86	2454.64	2.748	0.97723	4.89041	-6.49983	-399.7	-399.84
184	70.35	2473.13	2.748	0.977037	4.93323	-6.56654	-399.6	-399.74
185	70.85	2491.63	2.84	0.976844	4.97607	-6.63329	-394.8	-394.95
186	71.35	2509.53	2.918	0.97665	5.01753	-6.69788	-398.5	-398.65
187	71.84	2526.98	2.918	0.976456	5.05794	-6.76084	-390.2	-390.35
188	72.34	2544.43	2.861	0.976262	5.09835	-6.8238	-396.4	-396.55
189	72.84	2562.27	2.838	0.976332	5.13999	-6.90033	-392.7	-392.85
190	73.34	2580.28	2.838	0.976138	5.18216	-6.98316	-400.4	-400.55
191	73.84	2598.29	2.978	0.975944	5.22434	-7.06599	-393.5	-393.65
192	74.34	2615.51	2.991	0.975749	5.26467	-7.14519	-390.6	-390.75
193	74.84	2632.73	2.986	0.975553	5.305	-7.22439	-395.2	-395.35
194	75.34	2650.04	2.781	0.975606	5.34554	-7.30399	-396.9	-397.05
195	75.85	2668.62	2.781	0.97541	5.38938	-7.38255	-399.1	-399.25
196	76.35	2687.15	2.833	0.975214	5.43311	-7.46091	-396.9	-397.05
197	76.85	2705.33	2.95	0.975019	5.47601	-7.53778	-401	-401.15
198	77.36	2722.79	2.95	0.974823	5.51721	-7.61161	-387.9	-388.06
199	77.86	2740.25	3.005	0.974627	5.55841	-7.68545	-390.3	-390.46
200	78.36	2757.39	3.073	0.974771	5.59902	-7.77513	-390.8	-390.96
201	78.86	2774.17	3.073	0.974575	5.63897	-7.88515	-390.2	-390.36
202	79.37	2791.09	3.115	0.974378	5.67927	-7.99609	-395.6	-395.76
203	79.88	2807.79	3.158	0.97418	5.71903	-8.10559	-387.7	-387.86
204	80.39	2824.39	3.158	0.973981	5.75856	-8.21444	-388.9	-389.06
205	80.9	2841.12	2.991	0.973781	5.7984	-8.32413	-388.9	-389.06
206	81.42	2858.76	2.844	0.973841	5.84042	-8.42156	-395.4	-395.56
207	81.92	2876.9	2.844	0.973645	5.88363	-8.50274	-399.5	-399.66
208	82.42	2895.04	2.874	0.973449	5.92685	-8.58392	-401.7	-401.86
209	82.92	2913.01	2.884	0.973254	5.96966	-8.66434	-392.2	-392.37
210	83.44	2931.25	2.884	0.973054	6.01311	-8.74596	-393.9	-394.07
211	83.95	2949.5	2.746	0.973087	6.05659	-8.82763	-397.7	-397.87
212	84.46	2968.6	2.745	0.972889	6.10246	-8.89952	-401.1	-401.27
213	84.97	2987.67	2.778	0.972691	6.14827	-8.97093	-395.7	-395.87
214	85.48	3006.51	2.836	0.972492	6.19353	-9.04148	-398.7	-398.87
215	85.99	3025.13	2.836	0.972292	6.23826	-9.1112	-395	-395.17
216	86.5	3043.74	2.915	0.972092	6.28296	-9.18089	-394.7	-394.87
217	87.01	3061.71	2.954	0.972182	6.32645	-9.26514	-395.8	-395.97
218	87.52	3079.44	2.954	0.971984	6.36952	-9.35721	-391.8	-391.97
219	88.04	3097.48	2.961	0.971782	6.41334	-9.45089	-389.85	-390.03
220	88.56	3115.58	2.962	0.97158	6.45731	-9.54488	-387.9	-388.08
221	89.08	3133.68	2.908	0.971377	6.50128	-9.63887	-404.4	-404.57
222	89.6	3152.15	2.638	0.971365	6.54619	-9.72926	-401.1	-401.28
223	90.12	3172.53	2.638	0.971162	6.59599	-9.78273	-403.4	-403.58
224	90.65	3192.93	2.671	0.970959	6.64585	-9.83625	-391.8	-391.98
225	91.17	3213.1	2.686	0.970755	6.69514	-9.88917	-400.5	-400.68
226	91.69	3233.18	2.704	0.970551	6.74421	-9.94186	-406.2	-406.38
227	92.22	3253.16	2.769	0.97059	6.79316	-9.99852	-392.7	-392.88
228	92.74	3272.68	2.769	0.970386	6.84162	-10.0759	-400	-400.18
229	93.27	3292.22	2.795	0.970182	6.89012	-10.1533	-401.9	-402.08
230	93.79	3311.6	2.809	0.969977	6.93822	-10.2302	-391.3	-391.49
231	94.32	3330.91	2.803	0.969772	6.98615	-10.3067	-399.8	-399.99
232	94.85	3350.28	2.706	0.9698	7.03424	-10.3834	-404.2	-404.38
233	95.37	3370.36	2.706	0.969595	7.08463	-10.4568	-395.6	-395.79
234	95.9	3390.46	2.755	0.96939	7.13506	-10.5304	-397.2	-397.39
235	96.43	3410.22	2.795	0.969185	7.18465	-10.6026	-398.2	-398.39
236	96.96	3429.72	2.795	0.968979	7.23358	-10.674	-396.6	-396.79
237	97.49	3449.24	2.858	0.968773	7.28256	-10.7454	-395.6	-395.79
238	98.01	3468.34	2.858	0.968864	7.33105	-10.8458	-392.7	-392.89
239	98.54	3487.46	2.904	0.968658	7.37961	-10.9475	-401.8	-401.99
240	99.07	3506.28	2.978	0.968452	7.42741	-11.0477	-387.3	-387.5
241	99.6	3524.67	2.978	0.968245	7.47412	-11.1456	-394.6	-394.8
242	100.13	3543.06	2.864	0.968039	7.52082	-11.2435	-397.2	-397.4
243	100.66	3562.21	2.813	0.968143	7.56966	-11.3501	-394.5	-394.7
244	101.2	3581.72	2.838	0.967937	7.61953	-11.4615	-399.5	-399.7
245	101.73	3601.07	3.053	0.96773	7.66899	-11.5721	-389.9	-390.1
246	102.26	3619.07	3.053	0.967523	7.715	-11.6748	-390.8	-391
247	102.79	3637.08	3.04	0.967316	7.76103	-11.7777	-394.4	-394.6
248	103.32	3655.19	3.014	0.967459	7.80739	-11.8864	-391.7	-391.9
249	103.86	3673.47	3.014	0.967252	7.85436	-12.0096	-389.2	-389.41
250	104.39	3691.76	3.039	0.967044	7.90135	-12.1328	-401.6	-401.8
251	104.92	3709.91	3.055	0.966837	7.94798	-12.255	-387.2	-387.41
252	105.46	3727.98	3.055	0.966629	7.9944	-12.3767	-387.8	-388.01
253	105.99	3746.06	2.895	0.966421	8.04085	-12.4985	-404.9	-405.1
254	106.53	3765.16	2.864	0.966495	8.08999	-12.5998	-388.9	-389.11
255	107.06	3784.47	2.851	0.966288	8.13968	-12.6949	-394.9	-395.11
256	107.59	3803.88	2.809	0.96608	8.18963	-12.7906	-393.8	-394.01
257	108.13	3823.6	2.809	0.965872	8.24038	-12.8878	-399.6	-399.81
258	108.66	3843.34	2.858	0.965663	8.29117	-12.985	-400.9	-401.11
259	109.2	3862.75	2.879	0.965738	8.34139	-13.081	-391	-391.22
260	109.74	3882.02	2.868	0.96553	8.39137	-13.1765	-396.1	-396.31
261	110.27	3901.38	2.788	0.965322	8.44159	-13.2723	-398.5	-398.72
262	110.81	3921.31	2.788	0.965113	8.49329	-13.3711	-396.5	-396.72
263	111.35	3941.25	2.821	0.964904	8.54502	-13.4698	-397.8	-398.02
264	111.88	3960.97	2.844	0.965004	8.5964	-13.5747	-392.9	-393.12
265	112.42	3980.54	2.849	0.964795	8.64758	-13.6846	-398.7	-398.92
266	112.96	4000.08	2.952	0.964587	8.69867	-13.7943	-398.9	-399.12
267	113.49	4018.96	2.952	0.964378	8.74804	-13.9003	-390.6	-390.83
268	114.03	4037.85	2.934	0.964168	8.79744	-14.0063	-390.4	-390.63
269	114.57	4056.86	2.909	0.964269	8.84726	-14.1132	-402.3	-402.52
270	115.11	4076.04	2.909	0.96406	8.89771	-14.2214	-389.9	-390.13
271	115.65	4095.23	2.869	0.963851	8.94819	-14.3296	-390.3	-390.53
272	116.18	4114.7	2.86	0.963642	8.99941	-14.4394	-398.8	-399.03
273	116.72	4134.25	2.865	0.963432	9.05083	-14.5496	-397.8	-398.03
274	117.26	4153.77	2.881	0.963552	9.10224	-14.6617	-394.9	-395.14
275	117.8	4173.18	2.881	0.963343	9.1536	-14.7812	-392.2	-392.44
276	118.34	4192.61	2.948	0.963133	9.20501	-14.9009	-404.7	-404.94
277	118.88	4211.6	2.982	0.962924	9.25526	-15.0179	-391.2	-391.44
278	119.42	4230.39	2.982	0.962714	9.30499	-15.1336	-387.3	-387.55
279	119.96	4249.19	2.979	0.962504	9.35473	-15.2494	-396.4	-396.64
280	120.5	4268.01	2.979	0.962606	9.40474	-15.357	-387	-387.25
281	121.04	4286.84	2.895	0.962397	9.45478	-15.4642	-398.1	-398.35
282	121.58	4306.23	2.761	0.962187	9.50631	-15.5746	-401.4	-401.65
283	122.12	4326.56	2.761	0.961977	9.56033	-15.6904	-395.2	-395.45
284	122.66	4346.91	2.885	0.961767	9.61441	-15.8063	-393.4	-393.66
285	123.2	4366.4	2.899	0.961874	9.66647	-15.9193	-394.9	-395.16
286	123.74	4385.79	2.883	0.961664	9.7183	-16.0322	-397.1	-397.36
287	124.28	4405.29	2.849	0.961454	9.77043	-16.1456	-400.6	-400.86
288	124.82	4425.04	2.849	0.961244	9.82323	-16.2606	-393	-393.26
289	125.36	4444.8	2.993	0.961034	9.87606	-16.3756	-387.1	-387.37
290	125.9	4463.61	3.033	0.961149	9.92655	-16.4883	-397.5	-397.77
291	126.45	4482.18	2.999	0.960939	9.97647	-16.6008	-390.4	-390.67
292	126.99	4500.97	2.752	0.960729	10.027	-16.7146	-399.3	-399.57
293	127.53	4521.46	2.752	0.960519	10.0821	-16.8387	-397.5	-397.77
294	128.07	4541.95	2.817	0.960308	10.1372	-16.9629	-399.9	-400.18
295	128.61	4561.98	2.851	0.960415	10.1912	-17.0811	-395	-395.28
296	129.15	4581.76	2.853	0.960204	10.2446	-17.1959	-394.1	-394.38
297	129.7	4601.55	2.865	0.959994	10.2981	-17.3107	-393.4	-393.69
298	130.24	4621.26	2.865	0.959783	10.3513	-17.4251	-398.4	-398.69
299	130.78	4640.98	2.849	0.959573	10.4046	-17.5395	-395.1	-395.39
300	131.32	4660.81	2.839	0.959677	10.4584	-17.6539	-396	-396.29
301	131.87	4680.72	2.841	0.959467	10.5125	-17.7683	-397.3	-397.59
302	132.41	4700.63	2.856	0.959256	10.5666	-17.8828	-389.3	-389.6
303	132.95	4720.44	2.856	0.959045	10.6204	-17.9966	-399.6	-399.9
304	133.49	4740.25	2.795	0.958835	10.6743	-18.1104	-402.3	-402.6
305	134.04	4760.51	2.753	0.958916	10.7295	-18.2205	-396.7	-397
306	134.58	4781.08	2.752	0.958706	10.7858	-18.3262	-397.2	-397.51
307	135.12	4801.66	2.748	0.958495	10.842	-18.432	-402	-402.31
308	135.67	4822.28	2.748	0.958284	10.8984	-18.5379	-396.9	-397.21
309	136.21	4842.9	2.896	0.958073	10.9548	-18.6439	-390.9	-391.22
310	136.75	4862.49	2.961	0.958228	11.0087	-18.7688	-393.4	-393.72
311	137.3	4881.64	2.963	0.958017	11.0615	-18.9044	-395.9	-396.22
312	137.84	4900.78	2.985	0.957806	11.1143	-19.04	-395.1	-395.42
313	138.38	4919.79	2.985	0.957596	11.1667	-19.1746	-392.7	-393.03
314	138.93	4938.81	2.903	0.957384	11.2191	-19.3093	-389	-389.33
315	139.47	4958.37	2.824	0.957502	11.2731	-19.4395	-397.9	-398.23
316	140.01	4978.48	2.824	0.957291	11.3287	-19.5618	-398.9	-399.23
317	140.56	4998.6	2.853	0.95708	11.3843	-19.6843	-396.8	-397.13
318	141.1	5018.51	2.853	0.956869	11.4393	-19.8054	-396.6	-396.94
319	141.64	5038.44	2.821	0.956658	11.4944	-19.9267	-392.7	-393.04
320	142.19	5058.59	2.789	0.95679	11.5502	-20.0528	-400.6	-400.94
321	142.73	5078.98	2.795	0.956579	11.6068	-20.1852	-396.3	-396.65
322	143.28	5099.33	2.946	0.956368	11.6634	-20.3172	-395.6	-395.95
323	143.82	5118.64	2.946	0.956157	11.717	-20.4426	-393.3	-393.65
324	144.37	5137.96	2.974	0.955946	11.7707	-20.568	-391.4	-391.76
325	144.91	5157.11	3.009	0.956084	11.824	-20.6933	-391.3	-391.66
326	145.45	5176.03	3.009	0.955873	11.8768	-20.8187	-393.2	-393.56
327	146	5194.95	2.793	0.955662	11.9296	-20.9441	-397.6	-397.96
328	146.54	5215.35	2.75	0.955451	11.9865	-21.0794	-395.8	-396.16
329	147.09	5236.07	2.803	0.955239	12.0443	-21.2168	-403.1	-403.46
330	147.63	5256.41	2.886	0.955391	12.1011	-21.354	-396.3	-396.67
331	148.18	5276.17	2.886	0.95518	12.1565	-21.4925	-390.6	-390.97
332	148.72	5295.93	2.932	0.954969	12.2118	-21.631	-396	-396.37
333	149.27	5315.39	2.938	0.954758	12.2663	-21.7674	-390.6	-390.98
334	149.81	5334.81	2.927	0.954546	12.3207	-21.9036	-396.3	-396.68
335	150.36	5354.31	2.902	0.954335	12.3753	-22.0329	-394.5	-394.88
336	150.9	5373.98	2.902	0.954424	12.4306	-22.1375	-391.4	-391.78
337	151.45	5393.65	2.604	0.954213	12.4858	-22.2421	-407.6	-407.98
338	151.99	5415.59	2.525	0.954002	12.5474	-22.3588	-401.2	-401.58
339	152.54	5438.22	2.618	0.95379	12.611	-22.4791	-402.4	-402.78
340	153.08	5460.05	2.702	0.953841	12.6725	-22.5848	-395	-395.39
341	153.63	5481.2	2.667	0.95363	12.7324	-22.6754	-402.5	-402.89
342	154.17	5502.63	2.529	0.953419	12.7931	-22.7672	-407.9	-408.29
343	154.72	5525.25	2.529	0.953208	12.8571	-22.8641	-399.6	-400
344	155.26	5547.87	3.002	0.952996	12.9212	-22.9609	-394.6	-395
345	155.81	5566.93	3.021	0.953163	12.9757	-23.0951	-387.2	-387.61
346	156.35	5585.87	2.949	0.952952	13.03	-23.2349	-396.2	-396.61
347	156.9	5605.28	2.826	0.952741	13.0856	-23.3782	-394	-394.41
348	157.44	5625.54	2.826	0.952529	13.1436	-23.5277	-399.1	-399.51
349	157.99	5645.8	2.814	0.952318	13.2016	-23.6773	-395.2	-395.61
350	158.53	5666.16	2.812	0.952463	13.26	-23.8184	-396	-396.41
351	159.08	5686.52	2.83	0.952252	13.3185	-23.9572	-400.4	-400.81
352	159.63	5706.77	2.856	0.952041	13.3766	-24.0952	-391.1	-391.52
353	160.17	5726.84	2.856	0.951829	13.4342	-24.2319	-399.2	-399.62
354	160.72	5746.91	3.023	0.951618	13.4918	-24.3687	-386.2	-386.63
355	161.26	5765.88	3.04	0.95182	13.5464	-24.5222	-398.9	-399.32
356	161.81	5784.74	3.015	0.951608	13.6008	-24.6795	-389	-389.43
357	162.35	5803.76	2.952	0.951397	13.6556	-24.8381	-388.4	-388.84
358	162.9	5823.2	2.952	0.951186	13.7116	-25.0002	-400.4	-400.83
359	163.45	5842.63	3.006	0.950974	13.7676	-25.1622	-392.7	-393.14
360	163.99	5861.73	3.029	0.951137	13.8226	-25.3093	-391	-391.44
361	164.54	5880.68	3.004	0.950926	13.8772	-25.4476	-392.5	-392.94
362	165.08	5899.79	2.732	0.950714	13.9322	-25.587	-397.7	-398.14
363	165.63	5920.81	2.732	0.950503	13.9927	-25.7405	-399.8	-400.24
364	166.17	5941.84	2.673	0.950291	14.0532	-25.8939	-398.7	-399.15
365	166.72	5963.33	2.649	0.950428	14.1152	-26.0412	-403.7	-404.14
366	167.27	5985.02	2.751	0.950217	14.1778	-26.1839	-397.4	-397.85
367	167.81	6005.91	2.934	0.950005	14.2381	-26.3214	-391.7	-392.16
368	168.36	6025.51	2.934	0.949794	14.2946	-26.4504	-394.5	-394.96
369	168.91	6045.1	2.815	0.949582	14.3512	-26.5793	-396.8	-397.26
370	169.45	6065.54	2.794	0.949731	14.4104	-26.7189	-399.2	-399.66
371	170	6086.12	2.8	0.94952	14.47	-26.8609	-394	-394.47
372	170.54	6106.66	2.809	0.949308	14.5296	-27.0027	-391.4	-391.87
373	171.09	6127.14	2.809	0.949097	14.589	-27.1441	-403.5	-403.97
374	171.64	6147.63	2.869	0.948885	14.6484	-27.2856	-389.5	-389.98
375	172.18	6167.7	2.872	0.949045	14.7068	-27.4298	-399.9	-400.37
376	172.73	6187.74	2.844	0.948834	14.7651	-27.5745	-397.4	-397.88
377	173.28	6207.99	2.816	0.948623	14.824	-27.7207	-398.6	-399.08
378	173.82	6228.44	2.812	0.948411	14.8835	-27.8684	-394.1	-394.59
379	174.37	6248.93	2.714	0.9482	14.9432	-28.0164	-398.4	-398.89
380	174.91	6270.16	2.714	0.948334	15.0051	-28.1555	-401.7	-402.19
381	175.46	6291.39	2.778	0.948123	15.0671	-28.2939	-392.6	-393.1
382	176.01	6312.14	2.811	0.947912	15.1277	-28.4292	-395.4	-395.9
383	176.55	6332.65	2.769	0.9477	15.1875	-28.563	-402.1	-402.6
384	177.1	6353.47	2.655	0.947489	15.2484	-28.6966	-403.6	-404.1
385	177.65	6375.2	2.655	0.947601	15.3121	-28.8246	-396.5	-397.01
386	178.19	6396.93	2.666	0.947389	15.3759	-28.9527	-402.5	-403.01
387	178.74	6418.57	2.666	0.947178	15.4394	-29.0802	-398.8	-399.31
388	179.29	6440.21	2.845	0.946966	15.5029	-29.2078	-397	-397.52
389	179.83	6460.5	2.962	0.947117	15.5626	-29.3383	-389.4	-389.93
390	180.38	6479.99	2.925	0.946905	15.6202	-29.4735	-395	-395.52
391	180.93	6499.72	2.579	0.946694	15.6785	-29.6103	-404.9	-405.42
392	181.47	6522.11	2.579	0.946483	15.7447	-29.7656	-402.2	-402.73
393	182.02	6544.5	2.805	0.946271	15.8108	-29.9208	-389.2	-389.74
394	182.57	6565.1	2.859	0.946393	15.8719	-30.0518	-397	-397.54
395	183.11	6585.3	2.736	0.946182	15.9318	-30.1759	-401.8	-402.34
396	183.66	6606.42	2.563	0.94597	15.9945	-30.3057	-398.4	-398.94
397	184.21	6628.96	2.579	0.945759	16.0614	-30.4442	-407.8	-408.34
398	184.75	6651.38	2.654	0.945547	16.1279	-30.5828	-395.4	-395.95
399	185.3	6673.17	2.654	0.945691	16.193	-30.7293	-403.1	-403.65
400	185.85	6694.96	2.792	0.945479	16.2581	-30.8758	-406.1	-406.65
401	186.39	6715.67	2.813	0.945268	16.3199	-31.0151	-390.4	-390.97
402	186.94	6736.24	2.786	0.945057	16.3814	-31.1534	-392.6	-393.17
403	187.49	6757.01	2.753	0.944845	16.4435	-31.2904	-395.7	-396.27
404	188.03	6778.03	2.741	0.944975	16.5066	-31.4237	-402.9	-403.47
405	188.58	6799.14	2.603	0.944764	16.57	-31.5577	-401.9	-402.48
406	189.13	6821.38	2.603	0.944552	16.6367	-31.6988	-401.2	-401.78
407	189.67	6843.63	2.775	0.944341	16.7035	-31.84	-400.4	-400.99
408	190.22	6864.5	2.816	0.944554	16.7664	-32.0056	-397.5	-398.09
409	190.77	6885.07	2.895	0.944343	16.8285	-32.1833	-389.4	-390.01
410	191.32	6905.08	3.027	0.944132	16.889	-32.3561	-395.4	-396.01
411	191.86	6924.22	3.027	0.943921	16.9468	-32.5215	-387.9	-388.52
412	192.41	6943.36	2.759	0.943709	17.0046	-32.6868	-398.3	-398.91
413	192.96	6964.37	2.699	0.943871	17.068	-32.8482	-398.7	-399.31
414	193.5	6985.84	2.737	0.94366	17.1328	-33.0036	-401.3	-401.92
415	194.05	7007.02	2.782	0.943449	17.1968	-33.1569	-396.8	-397.43
416	194.6	7027.87	2.773	0.943238	17.2597	-33.3078	-395.6	-396.23
417	195.14	7048.78	2.64	0.943026	17.3228	-33.4591	-402.5	-403.13
418	195.69	7070.76	2.64	0.943159	17.3894	-33.6012	-399.5	-400.14
419	196.24	7092.74	2.669	0.942948	17.456	-33.7423	-397.8	-398.44
420	196.79	7114.48	2.677	0.942736	17.5219	-33.8819	-400.5	-401.15
421	197.33	7136.16	2.663	0.942525	17.5875	-34.0211	-400.8	-401.45
422	197.88	7157.95	2.649	0.942314	17.6537	-34.1509	-396.1	-396.76
423	198.43	7179.88	2.587	0.942401	17.7206	-34.2639	-405.3	-405.96
424	198.97	7202.31	2.383	0.94219	17.7889	-34.3795	-411.9	-412.56
425	199.52	7226.68	2.411	0.941978	17.8632	-34.505	-401.7	-402.37
426	200.07	7250.77	2.578	0.941767	17.9367	-34.6298	-399.3	-399.98
427	200.62	7273.31	2.578	0.941885	18.0061	-34.7648	-404.7	-405.38
428	201.16	7295.85	2.584	0.941674	18.0755	-34.8997	-403.1	-403.79
429	201.71	7318.33	2.585	0.941463	18.1447	-35.0343	-402.3	-403
430	202.26	7340.82	2.819	0.941252	18.214	-35.1689	-396.1	-396.81
431	202.8	7361.45	2.932	0.941421	18.2778	-35.3086	-388.3	-389.03
432	203.35	7381.28	2.842	0.94121	18.3393	-35.4553	-398.5	-399.22
433	203.9	7401.74	2.549	0.940999	18.4028	-35.6066	-406.3	-407.02
434	204.45	7424.56	2.548	0.940788	18.4736	-35.7754	-399.9	-400.63
435	204.99	7447.39	2.515	0.940577	18.5444	-35.9443	-404.7	-405.43
436	205.54	7470.52	2.515	0.9407	18.6164	-36.0891	-403.8	-404.54
437	206.09	7493.66	2.626	0.940489	18.6885	-36.2307	-395	-395.76
438	206.64	7515.82	2.65	0.940278	18.7575	-36.3663	-402.8	-403.56
439	207.18	7537.78	2.69	0.940067	18.8259	-36.5006	-404.2	-404.96
440	207.73	7559.43	2.721	0.939856	18.8936	-36.6547	-399.1	-399.88
441	208.28	7580.83	2.761	0.940063	18.9608	-36.8347	-393.3	-394.09
442	208.83	7601.92	2.899	0.939852	19.0269	-37.0121	-399.1	-399.89
443	209.37	7622.01	2.899	0.939641	19.09	-37.181	-389.2	-390.01
444	209.92	7642.11	2.889	0.93943	19.1531	-37.3501	-397.7	-398.51
445	210.47	7662.28	2.885	0.939624	19.2164	-37.5153	-388.4	-389.23
446	211.02	7682.47	2.801	0.939413	19.2798	-37.6778	-400.3	-401.12
447	211.56	7703.28	2.615	0.939202	19.3452	-37.8454	-403.7	-404.52
448	212.11	7725.57	2.623	0.938991	19.4153	-38.0248	-398.3	-399.14
449	212.66	7747.8	2.854	0.93878	19.4851	-38.2038	-396.1	-396.95
450	213.21	7768.23	2.854	0.938995	19.5494	-38.3792	-390.7	-391.57
451	213.75	7788.66	2.796	0.938784	19.6137	-38.5559	-404.7	-405.55
452	214.3	7809.52	2.758	0.938573	19.6794	-38.7363	-400.2	-401.07
453	214.85	7830.67	2.762	0.938363	19.746	-38.9192	-388.5	-389.39
454	215.4	7851.79	2.775	0.938151	19.8125	-39.0998	-390.4	-391.3
455	215.94	7872.82	2.775	0.938327	19.8787	-39.2585	-405.5	-406.38
456	216.49	7893.85	2.624	0.938116	19.945	-39.4172	-399.5	-400.4
457	217.04	7916.19	2.607	0.937904	20.0154	-39.5858	-402.1	-403.01
458	217.59	7938.69	2.743	0.937692	20.0862	-39.7556	-402.2	-403.11
459	218.14	7960.08	2.82	0.93748	20.1537	-39.9273	-395.2	-396.13
460	218.69	7980.88	2.804	0.937692	20.2195	-40.1057	-391.6	-392.55
461	219.24	8001.79	2.76	0.93748	20.2856	-40.2851	-396.5	-397.45
462	219.79	8023.05	2.76	0.937268	20.3528	-40.4674	-399.5	-400.45
463	220.34	8044.31	2.618	0.937057	20.42	-40.6497	-400.6	-401.56
464	220.89	8066.74	2.605	0.9372	20.491	-40.8106	-401.6	-402.57
465	221.44	8089.26	2.557	0.936988	20.5623	-40.9614	-400.6	-401.58
466	221.99	8112.21	2.537	0.936777	20.6349	-41.115	-406.3	-407.28
467	222.54	8135.35	2.486	0.936565	20.7081	-41.27	-398.3	-399.3
468	223.09	8158.98	2.443	0.936353	20.783	-41.4278	-411.7	-412.68
469	223.64	8183.02	2.542	0.936496	20.8596	-41.5879	-399.8	-400.81
470	224.19	8206.13	2.683	0.936284	20.9331	-41.7417	-396.9	-397.93
471	224.74	8228.02	2.629	0.936073	21.0028	-41.8874	-401.4	-402.43
472	225.29	8250.36	2.398	0.935861	21.074	-42.0358	-405.3	-406.33
473	225.84	8274.87	2.409	0.935969	21.1525	-42.175	-408.3	-409.33
474	226.39	8299.26	2.485	0.935757	21.2307	-42.3136	-406.5	-407.55
475	226.94	8322.91	2.488	0.935546	21.3064	-42.448	-400.8	-401.86
476	227.49	8346.54	2.627	0.935334	21.3822	-42.5822	-403.2	-404.27
477	228.04	8368.93	2.627	0.935504	21.4545	-42.7418	-397.5	-398.59
478	228.59	8391.31	2.604	0.935293	21.5268	-42.9072	-401	-402.09
479	229.14	8413.9	2.598	0.935082	21.5999	-43.0741	-401.5	-402.6
480	229.69	8436.54	2.571	0.93487	21.6731	-43.2414	-400.4	-401.51
481	230.24	8459.42	2.552	0.934659	21.7473	-43.4032	-400.3	-401.42
482	230.79	8482.48	2.518	0.934801	21.8222	-43.5558	-407.3	-408.41
483	231.34	8505.85	2.472	0.93459	21.8981	-43.7105	-403	-404.13
484	231.89	8529.65	2.522	0.934379	21.9755	-43.868	-404.2	-405.34
485	232.44	8553	2.642	0.934167	22.0514	-44.0271	-401.2	-402.35
486	232.99	8575.28	2.646	0.934365	22.1243	-44.2082	-397.2	-398.37
487	233.54	8597.52	2.702	0.934153	22.197	-44.389	-396.9	-398.08
488	234.09	8619.31	2.702	0.933942	22.2683	-44.5661	-397.8	-398.99
489	234.64	8641.11	2.652	0.933731	22.3397	-44.7434	-409.5	-410.68
490	235.19	8663.32	2.638	0.933519	22.4125	-44.9287	-397.1	-398.31
491	235.74	8685.65	2.699	0.93373	22.4857	-45.1182	-390.3	-391.54
492	236.29	8707.48	2.753	0.933519	22.5573	-45.3035	-397.5	-398.73
493	236.84	8728.88	2.756	0.933308	22.6276	-45.4852	-401.9	-403.13
494	237.39	8750.26	2.769	0.933096	22.6977	-45.6668	-392.4	-393.67
495	237.94	8771.55	2.769	0.933327	22.7677	-45.8596	-399.9	-401.16
496	238.49	8792.83	2.701	0.933116	22.8377	-46.0522	-399.3	-400.57
497	239.04	8814.66	2.692	0.932905	22.9094	-46.2499	-396.7	-397.99
498	239.59	8836.56	2.641	0.932693	22.9814	-46.4482	-402.1	-403.39
499	240.14	8858.89	2.607	0.932482	23.0548	-46.6465	-401.8	-403.11
500	240.69	8881.52	2.652	0.932697	23.1293	-46.8415	-397.5	-398.83
501	241.24	8903.75	2.732	0.932486	23.2024	-47.0331	-400.2	-401.53
502	241.79	8925.34	2.717	0.932275	23.2734	-47.2192	-395	-396.36
503	242.34	8947.05	2.519	0.932064	23.3448	-47.4063	-404.4	-405.75
504	242.89	8970.48	2.519	0.932276	23.4219	-47.6074	-402.1	-403.47
505	243.44	8993.9	2.776	0.932066	23.4991	-47.8083	-397.9	-399.29
506	243.99	9015.16	2.802	0.931855	23.5691	-47.9907	-393.4	-394.82
507	244.54	9036.22	2.765	0.931644	23.6385	-48.1713	-397.7	-399.12
508	245.09	9057.57	2.736	0.931433	23.7089	-48.3647	-397.4	-398.83
509	245.64	9079.16	2.756	0.931694	23.7801	-48.579	-397.4	-398.85
510	246.19	9100.58	2.823	0.931483	23.8508	-48.7917	-399	-400.46
511	246.74	9121.49	2.823	0.931272	23.9198	-48.9993	-391.8	-393.29
512	247.29	9142.41	2.763	0.931061	23.9888	-49.207	-392.7	-394.2
513	247.84	9163.79	2.753	0.93085	24.0593	-49.4178	-401.1	-402.59
514	248.39	9185.25	2.761	0.931107	24.13	-49.6287	-396.1	-397.62
515	248.94	9206.65	2.769	0.930896	24.2005	-49.8391	-397.7	-399.23
516	249.49	9227.98	2.769	0.930686	24.2707	-50.0487	-395.6	-397.15
517	250.04	9249.32	2.771	0.930475	24.341	-50.2584	-398.6	-400.15
518	250.59	9270.66	2.771	0.930699	24.4112	-50.4495	-394.9	-396.48
519	251.14	9291.99	2.577	0.930488	24.4813	-50.6399	-394.9	-396.49
520	251.69	9314.93	2.543	0.930278	24.5568	-50.8447	-407.4	-408.97
521	252.24	9338.18	2.659	0.930067	24.6332	-51.0523	-403.4	-405
522	252.79	9360.42	2.715	0.929856	24.7064	-51.2702	-392.2	-393.85
523	253.34	9382.2	2.815	0.930146	24.7781	-51.5051	-400.4	-402.04
524	253.89	9403.2	2.98	0.929936	24.8472	-51.7316	-391.1	-392.78
525	254.44	9423.05	2.98	0.929725	24.9125	-51.9457	-388.5	-390.21
526	254.99	9442.9	2.76	0.929514	24.9778	-52.1598	-394.8	-396.5
527	255.54	9464.35	2.734	0.929303	25.0482	-52.3875	-397.7	-399.41
528	256.09	9485.99	2.797	0.929584	25.1191	-52.6154	-401.2	-402.92
529	256.64	9507.14	2.846	0.929373	25.1884	-52.8382	-391.9	-393.66
530	257.19	9527.93	2.848	0.929163	25.2565	-53.0572	-393.3	-395.07
531	257.74	9548.72	2.858	0.928952	25.3246	-53.2762	-394.3	-396.09
532	258.29	9569.43	2.858	0.929276	25.3923	-53.5187	-395	-396.8
533	258.84	9590.14	2.931	0.929066	25.4599	-53.7629	-392.4	-394.22
534	259.39	9610.34	2.956	0.928855	25.5258	-54.001	-393.5	-395.34
535	259.94	9630.37	2.985	0.928645	25.5912	-54.2372	-390	-391.86
536	260.49	9650.21	3.07	0.928434	25.6559	-54.471	-389.25	-391.13
537	261.04	9669.5	3.07	0.928752	25.7184	-54.6959	-388.5	-390.4
538	261.59	9688.79	2.798	0.928542	25.7809	-54.9207	-394.3	-396.2
539	262.14	9709.96	2.688	0.928332	25.8495	-55.1674	-403.6	-405.48
540	262.69	9732	2.75	0.928121	25.921	-55.4243	-393.3	-395.23
541	263.24	9753.55	2.852	0.927911	25.9907	-55.6764	-398	-399.93
542	263.79	9774.33	2.852	0.928237	26.0575	-55.9242	-391	-392.97
543	264.34	9795.11	2.99	0.928027	26.1244	-56.172	-395.8	-397.77
544	264.89	9814.93	2.99	0.927816	26.1881	-56.4083	-386.4	-388.41
545	265.44	9834.75	2.919	0.927606	26.2519	-56.6447	-391.8	-393.8
546	265.99	9855.06	2.846	0.927395	26.3171	-56.8904	-398.2	-400.19
547	266.54	9875.91	2.861	0.927746	26.3836	-57.1538	-391.6	-393.63
548	267.09	9896.62	3.073	0.927535	26.4497	-57.4154	-393.4	-395.43
549	267.64	9915.92	3.073	0.927325	26.5113	-57.6593	-384.4	-386.47
550	268.19	9935.22	3.059	0.927115	26.5728	-57.9031	-391.3	-393.36
551	268.74	9954.62	3.045	0.926904	26.6346	-58.1552	-391	-393.07
552	269.29	9974.11	3.045	0.927307	26.6961	-58.4309	-388.3	-390.38
553	269.84	9993.59	3.177	0.927097	26.7576	-58.7064	-391.4	-393.48
554	270.39	10012.3	3.188	0.926886	26.8165	-58.9706	-382.9	-385.02
555	270.94	10030.9	3.056	0.926676	26.8753	-59.2338	-387.2	-389.31
556	271.49	10050.3	2.717	0.926466	26.9366	-59.5077	-405.5	-407.56
557	272.04	10072.1	2.717	0.926767	27.0045	-59.7558	-391.7	-393.82
558	272.59	10094	2.826	0.926557	27.0724	-60.0037	-392.1	-394.23
559	273.14	10115	2.835	0.926347	27.1376	-60.2421	-400.4	-402.51
560	273.69	10135.9	2.917	0.926136	27.2028	-60.4799	-386.7	-388.86
561	274.24	10156.3	2.992	0.925926	27.2659	-60.7177	-394.5	-396.65
562	274.79	10176.1	2.986	0.926264	27.3271	-60.9643	-389.9	-392.07
563	275.34	10196	2.833	0.926054	27.3885	-61.2112	-394.7	-396.86
564	275.89	10217	2.833	0.925844	27.4531	-61.4716	-396.6	-398.77
565	276.44	10238	2.889	0.925634	27.5178	-61.732	-388.6	-390.8
566	276.99	10258.5	2.921	0.925423	27.5809	-61.9935	-392.9	-395.1
567	277.54	10278.9	2.945	0.925784	27.643	-62.2603	-395.2	-397.4
568	278.09	10299	3.047	0.925574	27.7045	-62.525	-389.1	-391.33
569	278.64	10318.5	3.047	0.925364	27.764	-62.7809	-388.7	-390.94
570	279.19	10338	2.964	0.925154	27.8235	-63.0369	-391.8	-394.04
571	279.74	10358.1	2.919	0.924944	27.8843	-63.3064	-388.8	-391.06
572	280.29	10378.5	2.961	0.925331	27.9457	-63.5902	-397.7	-399.94
573	280.84	10398.5	3.162	0.925121	28.006	-63.8696	-390.4	-392.67
574	281.39	10417.4	3.162	0.924912	28.0626	-64.1313	-382.1	-384.41
575	281.94	10436.2	3.065	0.924701	28.1192	-64.3932	-387.9	-390.2
576	282.49	10455.6	2.982	0.924491	28.1773	-64.6607	-390.6	-392.9
577	283.04	10475.5	2.982	0.924859	28.2363	-64.9286	-393.3	-395.6
578	283.59	10495.5	2.976	0.92465	28.2953	-65.1967	-388.1	-390.43
579	284.14	10515.4	2.976	0.92444	28.3545	-65.4652	-391.6	-393.92
580	284.69	10535.4	2.912	0.92423	28.4136	-65.7338	-396.9	-399.21
581	285.24	10555.9	2.856	0.92402	28.4738	-66.0063	-398.7	-401.02
582	285.79	10576.7	2.872	0.924373	28.5345	-66.2789	-386.6	-388.97
583	286.34	10597.4	3.006	0.924163	28.5948	-66.5499	-390.7	-393.07
584	286.89	10617.2	3.006	0.923953	28.6525	-66.8089	-391.2	-393.58
585	287.44	10637	2.91	0.923743	28.7101	-67.0679	-389.5	-391.89
586	287.99	10657.5	2.848	0.923533	28.7694	-67.329	-400.9	-403.26
587	288.54	10678.4	2.84	0.923854	28.8293	-67.5843	-388.6	-391.02
588	289.09	10699.4	2.809	0.923644	28.8894	-67.8402	-397.9	-400.29
589	289.64	10720.6	2.809	0.923435	28.9502	-68.099	-393	-395.42
590	290.19	10741.8	2.795	0.923225	29.011	-68.3578	-394.4	-396.82
591	290.74	10763.1	2.793	0.923015	29.0716	-68.6426	-399.4	-401.81
592	291.29	10784.4	2.988	0.9234	29.132	-68.9432	-388.2	-390.67
593	291.84	10804.3	3.236	0.92319	29.1884	-69.224	-386.8	-389.29
594	292.39	10822.8	3.236	0.922981	29.2405	-69.4834	-383	-385.51
595	292.94	10841.2	3.272	0.922771	29.2926	-69.7429	-387.5	-390
596	293.49	10859.4	3.282	0.922561	29.3436	-70.0057	-390.1	-392.6
597	294.04	10877.5	3.268	0.922967	29.394	-70.2736	-377.1	-379.67
598	294.59	10895.8	2.854	0.922757	29.4445	-70.5425	-397.4	-399.9
599	295.14	10916.7	2.854	0.922547	29.5024	-70.8504	-390.6	-393.13
600	295.69	10937.5	2.839	0.922338	29.5604	-71.1585	-393.2	-395.74
601	296.24	10958.5	2.83	0.922128	29.6181	-71.4542	-395.2	-397.74
602	296.79	10979.6	2.859	0.922474	29.6752	-71.7305	-393.7	-396.26
603	297.34	11000.5	2.945	0.922264	29.7317	-72.0038	-392.9	-395.47
604	297.89	11020.7	2.945	0.922054	29.7866	-72.2693	-391.4	-393.99
605	298.44	11041	2.953	0.921844	29.8415	-72.5347	-384.5	-387.13
606	298.99	11061.2	2.955	0.921635	29.8956	-72.7948	-394.4	-397
607	299.54	11081.4	2.887	0.921964	29.9494	-73.051	-394.8	-397.4
608	300.09	11102	2.756	0.921754	30.0043	-73.313	-395.8	-398.41
609	300.64	11123.7	2.757	0.921544	30.0619	-73.5876	-396.2	-398.82
610	301.19	11145.3	2.873	0.921334	30.1195	-73.8622	-395.4	-398.04
611	301.74	11166.1	2.873	0.921125	30.174	-74.1414	-391.7	-394.36
612	302.29	11186.9	2.948	0.921486	30.2283	-74.4252	-390.9	-393.58
613	302.84	11207.1	2.999	0.921276	30.2812	-74.7017	-388	-390.7
614	303.39	11227	2.976	0.921067	30.3332	-74.9734	-392.6	-395.29
615	303.94	11247.1	2.771	0.920857	30.3856	-75.2475	-397.7	-400.38
616	304.49	11268.7	2.771	0.921194	30.4409	-75.5304	-394.3	-397.01
617	305.04	11290.2	2.919	0.920984	30.4959	-75.8115	-391.4	-394.13
618	305.59	11310.7	2.967	0.920775	30.5482	-76.0783	-387.7	-390.46
619	306.14	11330.8	2.888	0.920565	30.5996	-76.3408	-395.2	-397.93
620	306.69	11351.5	2.717	0.920355	30.6524	-76.611	-400.3	-403.02
621	307.24	11373.5	2.718	0.920698	30.7074	-76.9026	-393.3	-396.06
622	307.79	11395.5	3.019	0.920488	30.7624	-77.1941	-390	-392.79
623	308.34	11415.3	3.019	0.920279	30.8119	-77.4566	-390.9	-393.69
624	308.89	11435.1	2.958	0.920069	30.8614	-77.719	-387.4	-390.22
625	309.44	11455.3	2.898	0.919859	30.9116	-77.9858	-389.7	-392.52
626	309.99	11475.9	2.891	0.920192	30.9621	-78.2546	-398	-400.79
627	310.54	11496.6	2.801	0.919982	31.0126	-78.5241	-396.1	-398.91
628	311.09	11517.9	2.801	0.919773	31.0648	-78.8023	-392	-394.84
629	311.64	11539.3	2.706	0.919563	31.117	-79.0805	-397.7	-400.52
630	312.19	11561.4	2.673	0.919353	31.1704	-79.3747	-398.9	-401.73
631	312.74	11583.8	2.863	0.919702	31.2239	-79.6784	-394.7	-397.56
632	313.29	11604.6	3.102	0.919493	31.2738	-79.962	-386.8	-389.7
633	313.84	11623.9	3.102	0.919283	31.3198	-80.2237	-385.8	-388.72
634	314.39	11643.2	2.927	0.919074	31.3659	-80.4855	-387.9	-390.82
635	314.94	11663.7	2.91	0.918864	31.4139	-80.7616	-390.7	-393.61
636	315.49	11684.2	2.87	0.919207	31.4617	-81.0388	-402	-404.87
637	316.04	11705.1	2.829	0.918998	31.5102	-81.3197	-392.6	-395.53
638	316.59	11726.2	2.863	0.918788	31.5594	-81.6047	-390.8	-393.75
639	317.14	11747.1	3.156	0.918578	31.608	-81.8865	-394.6	-397.54
640	317.69	11766.1	3.156	0.918959	31.6511	-82.1605	-381	-384.01
641	318.24	11785.1	2.986	0.918749	31.6941	-82.4378	-382.1	-385.12
642	318.79	11805.1	2.83	0.91854	31.7394	-82.7309	-399.5	-402.44
643	319.34	11826.3	2.821	0.91833	31.7873	-83.04	-393.5	-396.48
644	319.89	11847.5	2.759	0.918121	31.8353	-83.3504	-398.4	-401.37
645	320.44	11869.2	2.759	0.918481	31.883	-83.6585	-393.4	-396.4
646	320.99	11890.9	3.023	0.918272	31.9305	-83.9651	-390.9	-393.92
647	321.54	11910.7	3.088	0.918062	31.9739	-84.245	-386.1	-389.16
648	322.09	11930.1	3.106	0.917853	32.0163	-84.5193	-387.8	-390.86
649	322.64	11949.4	3.159	0.917643	32.0585	-84.7919	-383.8	-386.89
650	323.19	11968.4	3.159	0.918019	32.0987	-85.0694	-386.9	-389.98
651	323.74	11987.4	2.903	0.917809	32.1388	-85.3472	-393	-396.06
652	324.29	12008	2.777	0.9176	32.1825	-85.6494	-396.6	-399.65
653	324.84	12029.6	2.772	0.91739	32.2281	-85.9654	-394.1	-397.17
654	325.39	12051.2	2.76	0.917181	32.2738	-86.2808	-395.5	-398.58
655	325.94	12073	2.76	0.917514	32.318	-86.5745	-395.4	-398.49
656	326.49	12094.7	2.925	0.917305	32.3622	-86.8683	-389.6	-392.73
657	327.04	12115.2	2.926	0.917095	32.4039	-87.1456	-394.8	-397.91
658	327.59	12135.7	2.944	0.916886	32.4456	-87.4228	-388.3	-391.46
659	328.14	12156	2.957	0.916676	32.4867	-87.7016	-394.8	-397.93
660	328.69	12176.3	2.945	0.917026	32.5266	-87.9869	-387.9	-391.08
661	329.24	12196.7	2.836	0.916816	32.5666	-88.2732	-396.1	-399.24
662	329.79	12217.9	2.836	0.916607	32.6082	-88.5708	-391.3	-394.48
663	330.34	12239	2.886	0.916397	32.6497	-88.8683	-393.6	-396.78
664	330.89	12259.8	2.904	0.916187	32.6898	-89.144	-387.8	-391.02
665	331.44	12280.5	2.769	0.916474	32.7289	-89.3992	-396.1	-399.29
666	331.99	12302.1	2.53	0.916265	32.7698	-89.6669	-403.2	-406.36
667	332.54	12325.9	2.535	0.916055	32.8145	-89.9599	-399.4	-402.59
668	333.09	12349.6	2.555	0.915846	32.8592	-90.2523	-400.8	-403.99
669	333.64	12373.1	2.555	0.916074	32.9021	-90.5054	-399.4	-402.61
670	334.19	12396.6	2.552	0.915864	32.945	-90.7576	-400.9	-404.12
671	334.74	12420.1	2.552	0.915655	32.9879	-91.0101	-399.2	-402.44
672	335.29	12443.6	2.395	0.915445	33.0308	-91.2628	-404.9	-408.12
673	335.84	12468.7	2.389	0.915652	33.0756	-91.5219	-404	-407.23
674	336.39	12493.9	2.579	0.915443	33.1201	-91.7781	-398.2	-401.48
675	336.94	12517.2	2.588	0.915233	33.1614	-92.0155	-400	-403.28
676	337.49	12540.4	2.451	0.915024	33.2026	-92.2521	-399.8	-403.09
677	338.04	12564.9	2.423	0.914814	33.2453	-92.4872	-406.2	-409.46
678	338.59	12589.7	2.362	0.914985	33.2881	-92.7154	-403.5	-406.79
679	339.14	12615.2	2.348	0.914775	33.332	-92.9495	-405.5	-408.79
680	339.69	12640.8	2.198	0.914566	33.3761	-93.1851	-414.8	-418.05
681	340.24	12668.1	2.178	0.914356	33.4226	-93.409	-406.2	-409.51
682	340.79	12695.8	2.249	0.914472	33.4692	-93.6207	-405.8	-409.12
683	341.34	12722.5	2.279	0.914263	33.5142	-93.8258	-410.9	-414.2
684	341.89	12748.9	2.431	0.914053	33.5587	-94.0281	-403.7	-407.06
685	342.44	12773.6	2.417	0.914225	33.5997	-94.2567	-400.6	-403.98
686	342.99	12798.5	2.341	0.914015	33.641	-94.4884	-409.6	-412.94
687	343.54	12824.2	2.288	0.913806	33.6837	-94.7278	-401.2	-404.6
688	344.09	12850.5	2.105	0.913596	33.7273	-94.9713	-413.3	-416.65
689	344.64	12879.1	2.113	0.913677	33.7735	-95.1639	-414.3	-417.65
690	345.19	12907.6	2.122	0.913468	33.8195	-95.3558	-408.8	-412.19
691	345.74	12936	2.142	0.913258	33.8653	-95.5469	-417.4	-420.76
692	346.29	12964.1	2.151	0.913049	33.9105	-95.7471	-406.8	-410.23
693	346.84	12992.1	2.225	0.913155	33.9552	-95.9571	-404.3	-407.76
694	347.39	13019.2	2.225	0.912946	33.9984	-96.1603	-412.4	-415.82
695	347.94	13046.3	2.113	0.912736	34.0416	-96.3634	-412.6	-416.03
696	348.49	13074.8	2.046	0.912784	34.0864	-96.5361	-410.9	-414.35
697	349.04	13104.2	1.913	0.912574	34.1326	-96.7081	-420.8	-424.21
698	349.59	13135.8	1.917	0.912365	34.182	-96.8921	-417.2	-420.64
699	350.14	13167.2	1.923	0.912156	34.2311	-97.064	-418.8	-422.25
700	350.69	13198.6	1.957	0.912179	34.2799	-97.2257	-415.6	-419.08
701	351.24	13229.4	2.007	0.91197	34.3278	-97.3847	-418.6	-422.07
702	351.79	13259.4	2.058	0.91176	34.3745	-97.5509	-410.9	-414.43
703	352.34	13288.7	2.067	0.911824	34.4198	-97.7367	-413.7	-417.22
704	352.89	13317.9	2.05	0.911615	34.465	-97.9218	-412.7	-416.24
705	353.44	13347.4	1.877	0.911406	34.5106	-98.1083	-419.3	-422.81
706	353.99	13379.5	1.941	0.911432	34.5598	-98.2806	-420.8	-424.32
707	354.54	13410.6	2.003	0.911223	34.6073	-98.4446	-412.1	-415.68
708	355.09	13440.7	2.079	0.911013	34.6534	-98.6035	-416	-419.57
709	355.64	13469.8	2.081	0.910804	34.6977	-98.7792	-408.8	-412.43
710	356.19	13498.8	2.031	0.910869	34.7418	-98.9654	-413.9	-417.51
711	356.74	13528.5	1.989	0.91066	34.787	-99.156	-416.4	-420.01
712	357.29	13558.9	1.944	0.910451	34.833	-99.3485	-417.7	-421.31
713	357.84	13590	2.06	0.910506	34.8797	-99.5395	-414.9	-418.54
714	358.39	13619.3	2.082	0.910297	34.9237	-99.7198	-410.4	-414.08
715	358.94	13648.3	2.081	0.910088	34.9672	-99.8981	-411.6	-415.28
716	359.49	13677.3	2.018	0.910142	35.0104	-100.076	-415	-418.67
717	360.04	13707.3	1.938	0.909932	35.0548	-100.26	-418.4	-422.07
718	360.59	13738.5	2.013	0.909723	35.101	-100.451	-415.5	-419.2
719	361.14	13768.5	2.051	0.909514	35.1453	-100.652	-412.9	-416.62
720	361.69	13798	2.187	0.909598	35.1885	-100.859	-408	-411.77
721	362.24	13825.6	2.15	0.909389	35.229	-101.053	-410.8	-414.56
722	362.79	13853.8	2.079	0.90918	35.2701	-101.253	-414.8	-418.54
723	363.34	13882.9	2.15	0.909279	35.312	-101.471	-408.7	-412.49
724	363.89	13911	2.201	0.90907	35.3525	-101.682	-408.5	-412.3
725	364.44	13938.5	2.11	0.908861	35.392	-101.888	-411.8	-415.59
726	364.99	13967.2	2.075	0.908651	35.4327	-102.081	-412.8	-416.6
727	365.54	13996.3	1.902	0.908706	35.4738	-102.263	-419	-422.77
728	366.09	14028.1	1.945	0.908497	35.5186	-102.461	-417.5	-421.29
729	366.64	14059.3	1.992	0.908288	35.5622	-102.656	-414	-417.82
730	367.19	14089.7	2.034	0.908345	35.6043	-102.849	-416.6	-420.42
731	367.74	14119.5	2.07	0.908136	35.6456	-103.037	-410.8	-414.67
732	368.29	14148.7	2.236	0.907927	35.6862	-103.223	-403.4	-407.32
733	368.84	14175.8	2.186	0.908031	35.7232	-103.43	-413.7	-417.57
734	369.39	14203.5	2.089	0.907822	35.761	-103.644	-410.2	-414.1
735	369.94	14232.5	2.006	0.907612	35.8006	-103.868	-415.9	-419.77
736	370.49	14262.7	1.954	0.907403	35.8413	-104.078	-416.8	-420.68
737	371.04	14293.7	1.931	0.907443	35.8826	-104.26	-417.3	-421.19
738	371.59	14325.1	1.97	0.907234	35.9243	-104.445	-417.1	-421
739	372.14	14355.9	2.038	0.907024	35.9651	-104.63	-411.9	-415.84
740	372.69	14385.6	2.025	0.907088	36.004	-104.827	-415.5	-419.43
741	373.24	14415.6	2.024	0.906879	36.0432	-105.025	-413.4	-417.35
742	373.79	14445.5	2.153	0.90667	36.0825	-105.223	-405	-409.02
743	374.34	14473.7	2.156	0.906773	36.1187	-105.437	-417.2	-421.15
744	374.89	14501.9	2.164	0.906564	36.1548	-105.656	-405.5	-409.54
745	375.44	14529.9	2.089	0.906355	36.1908	-105.874	-414.3	-418.29
746	375.99	14559	2.016	0.906146	36.2277	-106.098	-414.8	-418.79
747	376.54	14589	2.141	0.906237	36.2652	-106.323	-412	-416.02
748	377.09	14617.4	2.178	0.906028	36.3005	-106.536	-407.5	-411.57
749	377.64	14645.3	2.407	0.905819	36.3352	-106.745	-403.4	-407.5
750	378.19	14670.5	2.398	0.90598	36.3658	-106.977	-402.3	-406.42
751	378.74	14695.8	2.233	0.905771	36.3964	-107.219	-405.9	-410
752	379.29	14723	2.204	0.905562	36.4292	-107.478	-410.4	-414.48
753	379.84	14750.5	2.105	0.905353	36.4625	-107.741	-410.8	-414.89
754	380.39	14779.4	2.171	0.905472	36.4958	-107.983	-413.4	-417.48
755	380.94	14807.4	2.249	0.905263	36.528	-108.218	-406	-410.14
756	381.49	14834.4	2.317	0.905054	36.5591	-108.444	-402.6	-406.78
757	382.04	14860.6	2.36	0.904845	36.5889	-108.678	-404.3	-408.47
758	382.59	14886.4	2.265	0.905006	36.6173	-108.927	-406.9	-411.06
759	383.14	14913.2	2.225	0.904797	36.647	-109.186	-411.2	-415.34
760	383.69	14940.6	2.594	0.904587	36.6772	-109.45	-392.2	-396.49
761	384.24	14964	2.687	0.904378	36.7023	-109.71	-397.7	-401.96
762	384.79	14986.6	2.543	0.904618	36.7259	-109.982	-399.1	-403.35
763	385.34	15010.5	2.475	0.904409	36.7509	-110.27	-402.3	-406.54
764	385.89	15035.1	2.439	0.9042	36.7766	-110.565	-401.1	-405.36
765	386.44	15060.1	2.418	0.903991	36.8019	-110.837	-403.9	-408.15
766	386.99	15085.2	2.203	0.904132	36.8261	-111.07	-401.2	-405.48
767	387.54	15112.8	2.1	0.903923	36.8527	-111.325	-418.2	-422.36
768	388.09	15141.8	2.287	0.903714	36.8806	-111.593	-408.8	-413.04
769	388.64	15168.4	2.306	0.903834	36.9052	-111.829	-402.3	-406.6
770	389.19	15194.8	2.116	0.903625	36.929	-112.058	-411.1	-415.34
771	389.74	15223.6	2.128	0.903416	36.955	-112.308	-411.1	-415.35
772	390.29	15252.2	2.161	0.903206	36.9807	-112.554	-407.3	-411.59
773	390.84	15280.4	2.108	0.903289	37.0046	-112.77	-413.6	-417.85
774	391.39	15309.2	2.06	0.90308	37.0291	-112.991	-411.2	-415.48
775	391.94	15338.8	1.944	0.90287	37.0542	-113.217	-418.6	-422.83
776	392.49	15370.1	1.948	0.902661	37.0798	-113.435	-415.7	-419.96
777	393.04	15401.4	2.043	0.902705	37.1048	-113.641	-411.3	-415.6
778	393.59	15431.2	2.039	0.902496	37.1287	-113.837	-416.2	-420.47
779	394.14	15461.1	2.035	0.902287	37.1522	-114.048	-412.6	-416.91
780	394.69	15491.1	2.166	0.902372	37.1749	-114.282	-407.6	-411.95
781	395.24	15519.2	2.182	0.902162	37.1963	-114.502	-410.1	-414.44
782	395.79	15547.1	2.148	0.901953	37.2176	-114.72	-411.6	-415.94
783	396.34	15575.5	2.15	0.902047	37.2379	-114.951	-407.5	-411.88
784	396.89	15603.9	2.153	0.901838	37.258	-115.181	-409.9	-414.27
785	397.44	15632.2	2.043	0.901628	37.2781	-115.412	-411.3	-415.66
786	397.99	15662.1	1.969	0.901419	37.2986	-115.654	-419	-423.31
787	398.54	15693.1	2.256	0.901508	37.3188	-115.903	-399.4	-403.87
788	399.09	15720.1	2.246	0.901298	37.3365	-116.12	-413	-417.37
789	399.64	15747.3	1.948	0.901089	37.3542	-116.339	-416.4	-420.76
790	400.19	15778.6	2.01	0.901139	37.3731	-116.561	-416.3	-420.66
791	400.74	15809	2.081	0.90093	37.3912	-116.773	-410	-414.42
792	401.29	15838.3	2.085	0.900721	37.4087	-116.977	-410.7	-415.12
793	401.84	15867.6	2.083	0.900784	37.4253	-117.189	-412.7	-417.11
794	402.39	15896.9	2.055	0.900574	37.4414	-117.407	-411.8	-416.23
795	402.94	15926.6	2.007	0.900365	37.4577	-117.627	-414.2	-418.62
796	403.49	15957.1	1.94	0.900156	37.474	-117.841	-416.6	-421.01
797	404.04	15988.6	1.869	0.900164	37.4896	-118.026	-420	-424.39
798	404.59	16021.3	1.854	0.899955	37.5058	-118.218	-418.5	-422.91
799	405.14	16054.2	1.855	0.899745	37.522	-118.409	-419.6	-424.01
800	405.69	16087.2	1.852	0.899735	37.537	-118.586	-418.7	-423.12
801	406.24	16120.2	1.855	0.899525	37.552	-118.763	-420.1	-424.52
802	406.79	16153.2	1.866	0.899316	37.5668	-118.942	-419.8	-424.23
803	407.34	16185.9	1.944	0.899326	37.5805	-119.139	-414	-418.48
804	407.89	16217.4	1.962	0.899117	37.5937	-119.328	-416.2	-420.67
805	408.44	16248.6	1.874	0.898908	37.6067	-119.516	-417.6	-422.06
806	408.99	16281.2	1.874	0.898903	37.6189	-119.7	-421.6	-426.04
807	409.54	16313.9	1.87	0.898694	37.6311	-119.883	-416.6	-421.08
808	410.09	16346.6	1.809	0.898484	37.6434	-120.067	-423.8	-428.24
809	410.64	16380.4	1.879	0.898477	37.6547	-120.256	-414.2	-418.72
810	411.19	16413	1.934	0.898267	37.6656	-120.438	-417.8	-422.3
811	411.74	16444.7	1.898	0.898058	37.6761	-120.615	-416.9	-421.41
812	412.29	16476.9	1.895	0.898056	37.6857	-120.801	-419.1	-423.6
813	412.84	16509.2	1.89	0.897847	37.695	-120.988	-417.3	-421.82
814	413.39	16541.6	1.847	0.897637	37.7044	-121.176	-419.1	-423.61
815	413.94	16574.8	1.817	0.897608	37.7129	-121.35	-420.3	-424.81
816	414.49	16608.5	1.782	0.897399	37.7212	-121.52	-422.5	-427
817	415.04	16642.9	1.815	0.897189	37.7296	-121.694	-417.7	-422.24
818	415.59	16676.7	1.792	0.89715	37.7368	-121.857	-425.4	-429.89
819	416.14	16710.9	1.765	0.89694	37.7438	-122.021	-420.8	-425.33
820	416.69	16745.7	1.774	0.896731	37.7509	-122.187	-421.1	-425.64
821	417.24	16780.2	1.714	0.896668	37.7568	-122.333	-424.1	-428.62
822	417.79	16816	1.676	0.896458	37.7628	-122.481	-426.8	-431.3
823	418.34	16852.6	1.679	0.896249	37.7688	-122.632	-425.9	-430.42
824	418.89	16889.2	1.773	0.896188	37.7737	-122.787	-420.9	-425.46
825	419.44	16923.8	1.786	0.895978	37.7783	-122.934	-421.9	-426.46
826	419.99	16958.2	1.778	0.895769	37.7826	-123.08	-421.7	-426.27
827	420.54	16992.7	1.699	0.895707	37.786	-123.226	-422.6	-427.17
828	421.09	17028.8	1.672	0.895497	37.7896	-123.379	-429.8	-434.32
829	421.64	17065.6	1.674	0.895287	37.7926	-123.53	-423.9	-428.47
830	422.19	17102.3	1.75	0.895213	37.7949	-123.674	-421.9	-426.49
831	422.74	17137.3	1.683	0.895004	37.7971	-123.811	-425.8	-430.37
832	423.29	17173.9	1.668	0.894919	37.7986	-123.947	-426	-430.57
833	423.84	17210.7	1.665	0.894709	37.7996	-124.082	-425.7	-430.28
834	424.39	17247.6	1.619	0.894499	37.8007	-124.216	-426.4	-430.98
835	424.94	17285.6	1.545	0.894382	37.8006	-124.321	-434.2	-438.72
836	425.49	17325.4	1.557	0.894172	37.8005	-124.428	-427.5	-432.08
837	426.04	17364.9	1.593	0.893962	37.8	-124.536	-429.9	-434.46
838	426.59	17403.5	1.605	0.893847	37.7989	-124.645	-428.1	-432.68
839	427.14	17441.9	1.579	0.893637	37.7978	-124.753	-426.1	-430.71
840	427.69	17480.8	1.5	0.893498	37.7959	-124.842	-438.3	-442.81
841	428.24	17521.9	1.48	0.893288	37.7936	-124.93	-429.4	-433.99
842	428.79	17563.5	1.493	0.893079	37.7911	-125.013	-434.5	-439.05
843	429.34	17604.8	1.466	0.892924	37.788	-125.083	-433.9	-438.46
844	429.89	17646.8	1.444	0.892714	37.7848	-125.155	-434.6	-439.16
845	430.44	17689.4	1.394	0.892541	37.7809	-125.207	-439.3	-443.83
846	430.99	17733.6	1.483	0.892332	37.7768	-125.259	-431.6	-436.2
847	431.54	17775.2	1.492	0.892178	37.7726	-125.323	-432	-436.6
848	432.09	17816.5	1.49	0.891968	37.7682	-125.397	-435.5	-440.07
849	432.64	17857.9	1.526	0.891759	37.7637	-125.469	-429.4	-434.03
850	433.19	17898.3	1.418	0.891601	37.7586	-125.536	-437.2	-441.77
851	433.74	17941.8	1.501	0.891391	37.7532	-125.608	-429.5	-434.13
852	434.29	17982.9	1.384	0.891216	37.7475	-125.66	-441.5	-446.04
853	434.84	18027.5	1.392	0.891006	37.7411	-125.712	-436.2	-440.79
854	435.39	18071.9	1.401	0.890818	37.7345	-125.757	-435.6	-440.19
855	435.94	18116	1.386	0.890608	37.7275	-125.793	-439.9	-444.46
856	436.49	18160.5	1.392	0.890398	37.7204	-125.828	-435.5	-440.1
857	437.04	18204.9	1.351	0.890204	37.7129	-125.856	-439.7	-444.27
858	437.59	18250.6	1.292	0.889994	37.7052	-125.884	-442.5	-447.05
859	438.14	18298.5	1.292	0.889772	37.6967	-125.876	-442.1	-446.65
860	438.69	18346.3	1.293	0.889562	37.6881	-125.868	-442.1	-446.65
861	439.24	18394.1	1.273	0.889338	37.6795	-125.857	-443.5	-448.05
862	439.79	18442.7	1.439	0.889128	37.6706	-125.845	-433.9	-438.53
863	440.34	18485.7	1.353	0.888934	37.6627	-125.866	-439	-443.59
864	440.89	18531.4	1.303	0.888724	37.6543	-125.896	-443.7	-448.25
865	441.44	18578.9	1.341	0.888512	37.6453	-125.912	-438.6	-443.19
866	441.99	18625.1	1.345	0.888302	37.6363	-125.919	-438.4	-443
867	442.54	18671.1	1.297	0.88808	37.6272	-125.919	-442.5	-447.06
868	443.09	18718.9	1.265	0.88787	37.6176	-125.913	-444.2	-448.75
869	443.64	18767.8	1.28	0.887643	37.6077	-125.903	-443.1	-447.66
870	444.19	18816.3	1.31	0.887433	37.5978	-125.888	-440.5	-445.09
871	444.74	18863.6	1.331	0.887223	37.5881	-125.88	-440.7	-445.29
872	445.29	18910.1	1.345	0.887011	37.5784	-125.887	-438.8	-443.4
873	445.84	18956.2	1.33	0.886801	37.5688	-125.893	-440.3	-444.89
874	446.39	19002.9	1.301	0.886584	37.5589	-125.894	-441.9	-446.48
875	446.94	19050.5	1.3	0.886374	37.5487	-125.895	-441.7	-446.28
876	447.49	19098.3	1.306	0.886151	37.5382	-125.888	-441.4	-445.99
877	448.04	19145.8	1.289	0.885941	37.5278	-125.881	-442.3	-446.88
878	448.59	19194	1.296	0.885713	37.517	-125.867	-441.6	-446.18
879	449.14	19241.9	1.2	0.885503	37.5063	-125.852	-447.4	-451.94
880	449.69	19293.7	1.38	0.885275	37.4946	-125.837	-437.2	-441.82
881	450.24	19338.7	1.342	0.885065	37.4844	-125.824	-440.8	-445.39
882	450.79	19385	1.356	0.884854	37.4738	-125.828	-436.5	-441.12
883	451.34	19430.8	1.292	0.884644	37.4633	-125.837	-444.8	-449.35
884	451.89	19478.9	1.294	0.884417	37.452	-125.833	-440.5	-445.09
885	452.44	19527	1.295	0.884206	37.4406	-125.82	-442.9	-447.47
886	452.99	19575	1.31	0.883983	37.4291	-125.81	-441.4	-445.98
887	453.54	19622.5	1.316	0.883773	37.4177	-125.802	-439.3	-443.9
888	454.09	19669.8	1.316	0.883551	37.4062	-125.796	-443.4	-447.96
889	454.64	19717.1	1.304	0.883341	37.3946	-125.791	-438.2	-442.8
890	455.19	19764.9	1.276	0.883111	37.3828	-125.783	-446	-450.54
891	455.74	19813.7	1.311	0.882901	37.3705	-125.767	-441.3	-445.88
892	456.29	19861.2	1.343	0.88269	37.3585	-125.752	-435.8	-440.42
893	456.84	19907.6	1.236	0.882463	37.3468	-125.74	-447.9	-452.42
894	457.39	19958	1.262	0.882252	37.3339	-125.726	-444.6	-449.14
895	457.94	20007.4	1.357	0.882023	37.3211	-125.71	-436.3	-440.91
896	458.49	20053.4	1.306	0.881813	37.3092	-125.696	-442.5	-447.06
897	459.04	20101.1	1.319	0.881589	37.2967	-125.69	-441.3	-445.87
898	459.59	20148.4	1.477	0.881379	37.2843	-125.684	-432	-436.64
899	460.14	20190.7	1.306	0.881178	37.273	-125.706	-442.6	-447.15
900	460.69	20238.5	1.332	0.880967	37.2603	-125.731	-438.7	-443.28
901	461.24	20285.3	1.269	0.880737	37.2473	-125.727	-445.1	-449.62
902	461.79	20334.5	1.301	0.880527	37.2336	-125.711	-440.2	-444.76
903	462.34	20382.5	1.276	0.880291	37.22	-125.691	-443.8	-448.33
904	462.89	20431.5	1.258	0.880081	37.2061	-125.667	-443	-447.53
905	463.44	20481.2	1.239	0.879834	37.192	-125.633	-446.5	-451
906	463.99	20531.7	1.266	0.879623	37.1775	-125.592	-441.5	-446.04
907	464.54	20581	1.232	0.879375	37.1634	-125.551	-446.5	-451
908	465.09	20631.8	1.255	0.879164	37.1489	-125.508	-444.9	-449.41
909	465.64	20681.7	1.336	0.878938	37.1346	-125.486	-438.9	-443.46
910	466.19	20728.5	1.38	0.878727	37.1212	-125.477	-438.3	-442.86
911	466.74	20773.9	1.367	0.878513	37.1081	-125.476	-436.4	-440.97
912	467.29	20819.7	1.29	0.878302	37.0948	-125.484	-442.4	-446.92
913	467.84	20868.2	1.223	0.878051	37.0805	-125.472	-448	-452.47
914	468.39	20919.5	1.246	0.877841	37.0651	-125.426	-444.2	-448.7
915	468.94	20969.8	1.3	0.877606	37.05	-125.389	-441.7	-446.22
916	469.49	21018	1.321	0.877395	37.0356	-125.368	-439.5	-444.04
917	470.04	21065.4	1.33	0.877172	37.0213	-125.353	-442.1	-446.62
918	470.59	21112.5	1.334	0.876962	37.007	-125.349	-437.5	-442.05
919	471.14	21159.5	1.296	0.876729	36.9927	-125.343	-444.1	-448.6
920	471.69	21208	1.302	0.876519	36.9777	-125.326	-440.6	-445.13
921	472.24	21256.1	1.289	0.876279	36.9627	-125.308	-442.5	-447.01
922	472.79	21304.8	1.268	0.876068	36.9474	-125.28	-443.5	-448
923	473.34	21354.3	1.254	0.875858	36.9318	-125.25	-443.7	-448.19
924	473.89	21404.4	1.24	0.875606	36.9159	-125.204	-446.5	-450.97
925	474.44	21455	1.335	0.875384	36.8998	-125.162	-438.8	-443.33
926	474.99	21502.1	1.367	0.875174	36.8849	-125.161	-438.3	-442.83
927	475.54	21548.1	1.316	0.874963	36.8703	-125.16	-441.2	-445.7
928	476.09	21595.8	1.29	0.874729	36.8548	-125.142	-442.3	-446.79
929	476.64	21644.6	1.27	0.874518	36.8389	-125.123	-443.3	-447.78
930	477.19	21694.1	1.274	0.874273	36.8226	-125.09	-443.2	-447.68
931	477.74	21743.5	1.342	0.874063	36.8063	-125.055	-439.5	-444.01
932	478.29	21790.3	1.309	0.873834	36.7908	-125.041	-441.5	-445.99
933	478.84	21838.4	1.3	0.873623	36.7748	-125.03	-441.8	-446.28
934	479.39	21886.9	1.295	0.873384	36.7585	-125.009	-442.2	-446.68
935	479.94	21935.5	1.286	0.873174	36.742	-124.984	-441.7	-446.18
936	480.49	21984.5	1.242	0.872924	36.7253	-124.948	-446.3	-450.74
937	481.04	22035.2	1.296	0.872714	36.708	-124.906	-440.9	-445.38
938	481.59	22083.8	1.311	0.872479	36.6913	-124.881	-442.5	-446.96
939	482.14	22131.9	1.354	0.872268	36.6748	-124.862	-437.8	-442.3
940	482.69	22178.5	1.323	0.872035	36.6586	-124.846	-439.7	-444.18
941	483.24	22226.1	1.252	0.871825	36.642	-124.831	-445.6	-450.03
942	483.79	22276.5	1.247	0.871572	36.6243	-124.8	-445.7	-450.12
943	484.34	22327.1	1.32	0.871362	36.6063	-124.754	-440.6	-445.06
944	484.89	22375	1.408	0.871147	36.5893	-124.74	-436.9	-441.39
945	485.44	22419.8	1.392	0.870937	36.5734	-124.75	-432.8	-437.32
946	485.99	22465.2	1.293	0.870698	36.5571	-124.75	-446.1	-450.51
947	486.54	22514.1	1.275	0.870487	36.5392	-124.727	-443.7	-448.13
948	487.09	22563.6	1.316	0.870244	36.5209	-124.701	-438.8	-443.26
949	487.64	22611.6	1.279	0.870034	36.5031	-124.673	-443.3	-447.72
950	488.19	22661.1	1.241	0.869778	36.4847	-124.639	-446.2	-450.59
951	488.74	22712	1.281	0.869568	36.4655	-124.59	-442.9	-447.32
952	489.29	22761.4	1.344	0.869341	36.447	-124.552	-439.2	-443.64
953	489.84	22808.5	1.386	0.86913	36.4292	-124.547	-437.7	-442.15
954	490.39	22854.2	1.403	0.868906	36.412	-124.543	-436.2	-440.66
955	490.94	22899.3	1.31	0.868696	36.3946	-124.542	-442	-446.42
956	491.49	22947.6	1.33	0.868452	36.376	-124.541	-440.3	-444.73
957	492.04	22995.2	1.276	0.868242	36.3572	-124.515	-443.1	-447.5
958	492.59	23044.9	1.293	0.868031	36.3377	-124.485	-442.2	-446.61
959	493.14	23093.9	1.251	0.867776	36.3181	-124.442	-444.4	-448.79
960	493.69	23144.5	1.232	0.867566	36.2979	-124.396	-445.4	-449.78
961	494.24	23196	1.269	0.867303	36.2772	-124.338	-443.5	-447.89
962	494.79	23246	1.365	0.867055	36.2572	-124.281	-438.3	-442.73
963	495.34	23292.4	1.229	0.866845	36.2385	-124.245	-445.8	-450.17
964	495.89	23344.1	1.241	0.866634	36.2178	-124.208	-445	-449.37
965	496.44	23395.2	1.422	0.866396	36.1971	-124.185	-435.6	-440.04
966	496.99	23439.9	1.337	0.866185	36.1791	-124.166	-440.3	-444.7
967	497.54	23487.4	1.316	0.865948	36.1596	-124.147	-442	-446.39
968	498.09	23535.6	1.358	0.865737	36.1398	-124.128	-437.9	-442.31
969	498.64	23582.4	1.316	0.865497	36.1203	-124.108	-440.8	-445.19
970	499.19	23630.7	1.277	0.865286	36.1001	-124.087	-445.1	-449.45
971	499.74	23680.5	1.3	0.865033	36.0791	-124.052	-439.5	-443.89
972	500.29	23729.4	1.27	0.864822	36.0583	-124.01	-445.5	-449.84
973	500.84	23779.5	1.282	0.864566	36.037	-123.965	-441.7	-446.06
974	501.39	23829.1	1.286	0.864355	36.0157	-123.918	-443.3	-447.65
975	501.94	23878.6	1.285	0.8641	35.9945	-123.872	-441.9	-446.25
976	502.49	23928.1	1.273	0.863889	35.9732	-123.826	-444	-448.33
977	503.04	23978.2	1.288	0.863636	35.9516	-123.783	-442.9	-447.23
978	503.59	24027.6	1.344	0.863425	35.9303	-123.742	-440.2	-444.55
979	504.14	24075	1.386	0.8632	35.9097	-123.723	-436.1	-440.48
980	504.69	24120.9	1.407	0.862989	35.8896	-123.723	-438.6	-442.95
981	505.24	24166.2	1.404	0.862768	35.8697	-123.725	-434.9	-439.28
982	505.79	24211.6	1.369	0.862557	35.8494	-123.731	-439.5	-443.84
983	506.34	24258.2	1.341	0.862318	35.8285	-123.733	-440.7	-445.03
984	506.89	24305.8	1.339	0.862107	35.8066	-123.716	-438.3	-442.64
985	507.44	24353.4	1.239	0.861843	35.7847	-123.695	-447.2	-451.47
986	507.99	24404.9	1.294	0.861632	35.7606	-123.636	-441.8	-446.1
987	508.54	24454.3	1.342	0.861388	35.7375	-123.582	-439.3	-443.62
988	509.09	24501.9	1.327	0.861177	35.7151	-123.557	-441.3	-445.6
989	509.64	24550	1.381	0.860945	35.6925	-123.531	-437.7	-442.02
990	510.19	24596.2	1.365	0.860734	35.6705	-123.523	-438.9	-443.21
991	510.74	24643.1	1.349	0.860499	35.6482	-123.516	-439.9	-444.2
992	511.29	24690.5	1.386	0.860288	35.6252	-123.506	-437.4	-441.72
993	511.84	24736.6	1.354	0.86004	35.6027	-123.495	-439.3	-443.6
994	512.39	24783.8	1.319	0.859829	35.5794	-123.471	-441.4	-445.68
995	512.94	24832.3	1.282	0.859618	35.5552	-123.441	-441.8	-446.07
996	513.49	24882.2	1.211	0.85934	35.5302	-123.381	-448.1	-452.32
997	514.04	24935	1.231	0.859066	35.5035	-123.301	-445.4	-449.64
998	514.59	24987.1	1.269	0.858855	35.4773	-123.226	-443.4	-447.65
999	515.14	25037.5	1.269	0.85857	35.4519	-123.155	-442.8	-447.05
1000	515.69	25088	1.177	0.858359	35.4265	-123.071	-449.3	-453.5
1001	516.24	25142.5	1.261	0.858093	35.3991	-122.975	-443.8	-448.04
1002	516.79	25193.3	1.3	0.857882	35.3736	-122.912	-442.1	-446.35
1003	517.34	25242.6	1.341	0.857633	35.349	-122.855	-440	-444.26
1004	517.89	25290.4	1.337	0.857422	35.3249	-122.82	-439.7	-443.96
1005	518.44	25338.4	1.27	0.857154	35.3008	-122.789	-444.3	-448.52
1006	518.99	25388.9	1.292	0.856943	35.2752	-122.734	-441.7	-445.94
1007	519.54	25438.5	1.227	0.856658	35.2499	-122.673	-446.2	-450.4
1008	520.09	25490.8	1.221	0.856447	35.2231	-122.588	-446.4	-450.59
1009	520.64	25543.4	1.458	0.856212	35.1962	-122.498	-433.5	-437.79
1010	521.19	25587.5	1.347	0.856	35.1738	-122.478	-439.7	-443.93
1011	521.74	25635.2	1.249	0.855713	35.1496	-122.467	-445.2	-449.39
1012	522.29	25686.6	1.208	0.855502	35.123	-122.398	-447.1	-451.27
1013	522.84	25739.8	1.218	0.855214	35.0954	-122.303	-446.2	-450.37
1014	523.39	25792.6	1.231	0.855003	35.0681	-122.207	-445.6	-449.77
1015	523.94	25844.9	1.24	0.854725	35.0411	-122.111	-445.2	-449.37
1016	524.49	25896.7	1.277	0.854514	35.0144	-122.031	-443.1	-447.28
1017	525.04	25947.2	1.25	0.854239	34.9886	-121.955	-444.9	-449.06
1018	525.59	25998.7	1.29	0.854028	34.9622	-121.881	-442.2	-446.38
1019	526.14	26048.6	1.247	0.853744	34.9366	-121.81	-444.9	-449.05
1020	526.69	26100.2	1.235	0.853533	34.9101	-121.723	-445.6	-449.74
1021	527.24	26152.4	1.252	0.853257	34.8834	-121.634	-444.9	-449.04
1022	527.79	26203.9	1.294	0.853045	34.8571	-121.558	-442	-446.16
1023	528.34	26253.7	1.287	0.852765	34.8317	-121.484	-442	-446.16
1024	528.89	26303.8	1.21	0.852553	34.8062	-121.404	-447.2	-451.31
1025	529.44	26357.2	1.179	0.852251	34.779	-121.313	-448.9	-453
1026	529.99	26411.9	1.205	0.85204	34.7512	-121.189	-447.9	-452
1027	530.54	26465.5	1.248	0.851753	34.7241	-121.074	-443.2	-447.33
1028	531.09	26517.2	1.25	0.851542	34.6983	-120.981	-445.2	-449.31
1029	531.64	26568.9	1.248	0.851259	34.6725	-120.89	-445	-449.11
1030	532.19	26620.7	1.263	0.851047	34.6468	-120.801	-444	-448.11
1031	532.74	26671.8	1.282	0.850771	34.6214	-120.719	-443.2	-447.31
1032	533.29	26722.2	1.275	0.85056	34.5965	-120.644	-441.8	-445.92
1033	533.84	26773	1.231	0.850273	34.5715	-120.561	-447.2	-451.27
1034	534.39	26825.5	1.229	0.849983	34.5456	-120.464	-446.2	-450.27
1035	534.94	26878.2	1.245	0.849772	34.5198	-120.366	-443.2	-447.29
1036	535.49	26930.2	1.221	0.849492	34.4944	-120.266	-448.9	-452.94
1037	536.04	26983.2	1.305	0.849281	34.4686	-120.174	-439.6	-443.71
1038	536.59	27032.8	1.273	0.848996	34.4446	-120.094	-443.7	-447.77
1039	537.14	27083.7	1.23	0.848785	34.4201	-120.007	-447.3	-451.34
1040	537.69	27136.4	1.311	0.848506	34.3947	-119.914	-439.9	-443.99
1041	538.24	27185.8	1.254	0.848295	34.3711	-119.834	-445.2	-449.24
1042	538.79	27237.5	1.237	0.848013	34.3464	-119.752	-445.9	-449.93
1043	539.34	27290	1.303	0.847802	34.3214	-119.665	-441.1	-445.16
1044	539.89	27339.8	1.188	0.847502	34.2978	-119.581	-448.6	-452.6
1045	540.44	27394.4	1.234	0.84729	34.2719	-119.464	-445.9	-449.91
1046	540.99	27447	1.333	0.847014	34.2471	-119.346	-440.2	-444.25
1047	541.54	27495.7	1.238	0.846803	34.2245	-119.269	-445.8	-449.8
1048	542.09	27548.2	1.294	0.846525	34.2002	-119.189	-442.2	-446.22
1049	542.64	27598.4	1.27	0.846314	34.177	-119.11	-443.7	-447.71
1050	543.19	27649.6	1.227	0.846016	34.1533	-119.03	-446	-449.98
1051	543.74	27702.6	1.205	0.845804	34.129	-118.913	-447.4	-451.37
1052	544.29	27756.5	1.233	0.845517	34.1043	-118.796	-446.9	-450.87
1053	544.84	27809.3	1.299	0.845305	34.0805	-118.696	-440.5	-444.51
1054	545.39	27859.4	1.289	0.845025	34.058	-118.603	-443.1	-447.08
1055	545.94	27909.9	1.25	0.844813	34.0355	-118.518	-444.6	-448.56
1056	546.49	27962	1.231	0.844521	34.0124	-118.427	-447.1	-451.04
1057	547.04	28014.9	1.251	0.844233	33.9891	-118.318	-443.8	-447.76
1058	547.59	28067	1.257	0.844021	33.9662	-118.213	-444.8	-448.75
1059	548.14	28118.8	1.249	0.843737	33.9437	-118.113	-444.5	-448.44
1060	548.69	28171	1.256	0.843525	33.9212	-118.014	-445.9	-449.83
1061	549.24	28222.9	1.307	0.843271	33.8991	-117.919	-441.6	-445.55
1062	549.79	28272.8	1.373	0.843059	33.8779	-117.849	-439	-442.97
1063	550.34	28320.3	1.399	0.842834	33.8578	-117.807	-435.9	-439.88
1064	550.89	28366.9	1.449	0.842623	33.8381	-117.78	-439.3	-443.25
1065	551.44	28412	1.493	0.842411	33.819	-117.781	-427.6	-431.63
1066	551.99	28455.7	1.37	0.842159	33.8004	-117.777	-441.8	-445.73
1067	552.54	28503.4	1.34	0.841947	33.7797	-117.737	-440.5	-444.43
1068	553.09	28552.1	1.352	0.841667	33.7585	-117.695	-438.4	-442.34
1069	553.64	28600.5	1.206	0.841455	33.7373	-117.613	-449.5	-453.36
1070	554.19	28654.7	1.322	0.841202	33.7136	-117.526	-441.2	-445.11
1071	554.74	28704.1	1.466	0.84099	33.6921	-117.483	-433.4	-437.36
1072	555.29	28748.8	1.509	0.84076	33.6727	-117.445	-432.5	-436.46
1073	555.84	28792.1	1.394	0.840548	33.6538	-117.437	-438	-441.92
1074	556.39	28839	1.347	0.840282	33.6332	-117.43	-440	-443.9
1075	556.94	28887.6	1.315	0.84007	33.6116	-117.381	-442.8	-446.68
1076	557.49	28937.4	1.396	0.83981	33.5893	-117.319	-436.6	-440.51
1077	558.04	28984.4	1.351	0.839598	33.5683	-117.267	-439.2	-443.09
1078	558.59	29032.8	1.251	0.839298	33.5467	-117.215	-445.7	-449.54
1079	559.14	29085.2	1.212	0.839086	33.5232	-117.117	-447.8	-451.62
1080	559.69	29139.3	1.308	0.838805	33.4989	-116.993	-441.3	-445.16
1081	560.24	29189.4	1.287	0.838594	33.4767	-116.901	-443	-446.84
1082	560.79	29240.4	1.234	0.838303	33.4543	-116.814	-446.1	-449.92
1083	561.34	29293.6	1.288	0.838091	33.4312	-116.709	-443	-446.83
1084	561.89	29344.5	1.377	0.837836	33.409	-116.607	-438.7	-442.56
1085	562.44	29392.2	1.364	0.837624	33.3886	-116.556	-439.8	-443.64
1086	562.99	29440.3	1.447	0.837391	33.3679	-116.511	-435.6	-439.47
1087	563.54	29485.7	1.463	0.837179	33.3484	-116.493	-433.4	-437.27
1088	564.09	29530.6	1.408	0.836929	33.3291	-116.483	-438.6	-442.43
1089	564.64	29577.3	1.39	0.836717	33.3088	-116.458	-438.1	-441.93
1090	565.19	29624.6	1.384	0.836452	33.288	-116.423	-438	-441.83
1091	565.74	29672	1.348	0.83624	33.2671	-116.376	-439.7	-443.51
1092	566.29	29720.8	1.312	0.835965	33.2454	-116.316	-443.3	-447.08
1093	566.84	29771	1.32	0.835753	33.2232	-116.248	-441.4	-445.19
1094	567.39	29820.8	1.333	0.835488	33.2011	-116.172	-440	-443.79
1095	567.94	29870.2	1.348	0.835276	33.1792	-116.102	-442.2	-445.97
1096	568.49	29919.1	1.376	0.835023	33.1577	-116.042	-436.6	-440.4
1097	569.04	29966.9	1.394	0.834811	33.1366	-115.989	-439.8	-443.58
1098	569.59	30014.2	1.401	0.834563	33.1157	-115.949	-436.2	-439.99
1099	570.14	30061.2	1.403	0.834351	33.095	-115.911	-438.9	-442.67
1100	570.69	30108.2	1.428	0.834115	33.0741	-115.879	-436.1	-439.88
1101	571.24	30154.4	1.455	0.833903	33.0535	-115.85	-435.1	-438.89
1102	571.79	30199.7	1.446	0.833691	33.0331	-115.835	-435.9	-439.67
1103	572.34	30245.3	1.538	0.833466	33.0126	-115.82	-430.8	-434.6
1104	572.89	30288.3	1.436	0.833254	32.993	-115.82	-438.2	-441.95
1105	573.44	30334.2	1.497	0.833013	32.972	-115.822	-431.8	-435.59
1106	573.99	30378.3	1.442	0.832801	32.9514	-115.81	-434.1	-437.87
1107	574.54	30424.1	1.351	0.832535	32.9299	-115.79	-443.2	-446.9
1108	575.09	30473	1.353	0.832323	32.9067	-115.751	-439.9	-443.61
1109	575.64	30521.8	1.403	0.832074	32.8834	-115.692	-437.1	-440.83
1110	576.19	30569	1.421	0.831862	32.8608	-115.644	-436.7	-440.42
1111	576.74	30615.5	1.422	0.831621	32.8385	-115.611	-437.1	-440.82
1112	577.29	30662	1.44	0.831409	32.8161	-115.582	-436.6	-440.31
1113	577.84	30708	1.471	0.831151	32.7939	-115.564	-433.5	-437.23
1114	578.39	30752.9	1.428	0.83094	32.772	-115.544	-436.8	-440.5
1115	578.94	30799.3	1.35	0.83064	32.7492	-115.5	-440.1	-443.78
1116	579.49	30848.3	1.252	0.830428	32.7249	-115.453	-445.7	-449.33
1117	580.04	30901.2	1.281	0.830132	32.6986	-115.337	-443.4	-447.04
1118	580.59	30953	1.283	0.82992	32.6729	-115.221	-443	-446.64
1119	581.14	31004.6	1.275	0.829632	32.6476	-115.11	-445.9	-449.52
1120	581.69	31056.6	1.344	0.829421	32.6222	-115	-437.1	-440.77
1121	582.24	31105.9	1.264	0.829132	32.5984	-114.907	-447	-450.6
1122	582.79	31158.4	1.291	0.82892	32.5731	-114.807	-442.3	-445.92
1123	583.34	31209.8	1.337	0.82864	32.5485	-114.708	-441.9	-445.52
1124	583.89	31259.4	1.361	0.828428	32.5248	-114.615	-436.6	-440.25
1125	584.44	31308.2	1.295	0.828148	32.5018	-114.534	-446.5	-450.08
1126	584.99	31359.5	1.341	0.827936	32.4776	-114.45	-438.4	-442.03
1127	585.54	31409	1.34	0.827651	32.4543	-114.367	-441.2	-444.8
1128	586.09	31458.6	1.318	0.827439	32.4311	-114.284	-442	-445.59
1129	586.64	31509	1.312	0.827156	32.4075	-114.191	-442	-445.59
1130	587.19	31559.7	1.316	0.826943	32.3839	-114.098	-442.6	-446.18
1131	587.74	31610.3	1.343	0.826668	32.3606	-114.008	-440.1	-443.69
1132	588.29	31659.8	1.354	0.826456	32.3378	-113.922	-440.1	-443.69
1133	588.84	31709	1.355	0.826185	32.3153	-113.847	-440.1	-443.68
1134	589.39	31758.1	1.355	0.825973	32.2929	-113.772	-440.1	-443.68
1135	589.94	31807.3	1.384	0.825722	32.2705	-113.703	-440.1	-443.67
1136	590.49	31855.4	1.48	0.82551	32.2486	-113.638	-432.2	-435.82
1137	591.04	31900.4	1.393	0.825243	32.2282	-113.603	-439	-442.57
1138	591.59	31948.2	1.37	0.825031	32.2065	-113.567	-439.5	-443.07
1139	592.14	31996.9	1.398	0.824723	32.1842	-113.505	-438	-441.58
1140	592.69	32044.6	1.273	0.82451	32.1624	-113.445	-444	-447.53
1141	593.24	32097	1.234	0.82421	32.1383	-113.317	-446.6	-450.11
1142	593.79	32151.1	1.29	0.823998	32.1136	-113.178	-442.7	-446.23
1143	594.34	32202.8	1.271	0.82369	32.0905	-113.057	-443.8	-447.32
1144	594.89	32255.3	1.236	0.823478	32.0671	-112.932	-447.3	-450.8
1145	595.44	32309.4	1.283	0.823192	32.0435	-112.793	-443.5	-447.02
1146	595.99	32361.5	1.33	0.82298	32.0209	-112.666	-440.4	-443.94
1147	596.54	32411.7	1.338	0.822689	31.9996	-112.57	-441.4	-444.93
1148	597.09	32461.7	1.317	0.822476	31.9785	-112.472	-440.4	-443.93
1149	597.64	32512.5	1.282	0.822172	31.9572	-112.366	-446.3	-449.79
1150	598.19	32564.6	1.278	0.82196	31.9356	-112.251	-440.5	-444.03
1151	598.74	32617	1.243	0.821677	31.9141	-112.12	-449.3	-452.77
1152	599.29	32670.8	1.328	0.821465	31.8924	-111.998	-442.2	-445.71
1153	599.84	32721.3	1.446	0.821208	31.8723	-111.905	-431.9	-435.48
1154	600.39	32767.6	1.437	0.820996	31.8541	-111.833	-436.8	-440.34
1155	600.94	32814.2	1.382	0.820751	31.8359	-111.786	-440.3	-443.82
1156	601.49	32862.7	1.431	0.820539	31.8169	-111.741	-438	-441.53
1157	602.04	32909.6	1.529	0.820317	31.7986	-111.71	-429.3	-432.88
1158	602.59	32953.4	1.487	0.820105	31.7815	-111.684	-435.7	-439.24
1159	603.14	32998.5	1.596	0.819842	31.7637	-111.688	-428.3	-431.89
1160	603.69	33040.5	1.426	0.81963	31.7471	-111.692	-437.4	-440.93
1161	604.24	33087.6	1.393	0.819364	31.7281	-111.648	-438.9	-442.41
1162	604.79	33135.8	1.407	0.819152	31.7085	-111.59	-436.9	-440.42
1163	605.34	33183.5	1.388	0.818897	31.6892	-111.53	-439.9	-443.4
1164	605.89	33231.9	1.419	0.818684	31.6696	-111.468	-436.2	-439.72
1165	606.44	33279.2	1.443	0.818472	31.6505	-111.416	-437.3	-440.81
1166	606.99	33325.8	1.433	0.818213	31.6316	-111.371	-433.7	-437.23
1167	607.54	33372.7	1.411	0.818001	31.6127	-111.322	-441.2	-444.68
1168	608.09	33420.4	1.431	0.817733	31.5934	-111.27	-434.7	-438.22
1169	608.64	33467.4	1.424	0.81752	31.5743	-111.214	-435.6	-439.11
1170	609.19	33514.6	1.328	0.817216	31.5552	-111.149	-442.1	-445.57
1171	609.74	33565.3	1.266	0.817004	31.5347	-111.063	-445.8	-449.24
1172	610.29	33618.4	1.274	0.816697	31.5132	-110.928	-443.9	-447.35
1173	610.84	33671.3	1.276	0.816398	31.4921	-110.793	-443	-446.46
1174	611.39	33724.1	1.259	0.816186	31.4715	-110.654	-446.5	-449.93
1175	611.94	33777.6	1.304	0.815902	31.451	-110.52	-442.6	-446.05
1176	612.49	33829.3	1.351	0.815689	31.4315	-110.397	-438.7	-442.17
1177	613.04	33879.2	1.334	0.815427	31.4131	-110.291	-442.7	-446.15
1178	613.59	33929.8	1.37	0.815215	31.3946	-110.193	-439.6	-443.06
1179	614.14	33979	1.43	0.814974	31.3769	-110.119	-436.2	-439.68
1180	614.69	34026.2	1.461	0.814762	31.36	-110.06	-435.3	-438.78
1181	615.24	34072.4	1.488	0.814549	31.3436	-110.018	-434.7	-438.19
1182	615.79	34117.8	1.498	0.81431	31.3275	-109.992	-432.3	-435.8
1183	616.34	34162.9	1.486	0.814098	31.3115	-109.968	-435.5	-438.98
1184	616.89	34208.3	1.497	0.813854	31.2952	-109.945	-433.7	-437.18
1185	617.44	34253.5	1.526	0.813642	31.279	-109.922	-432	-435.49
1186	617.99	34297.8	1.432	0.813383	31.263	-109.894	-437	-440.46
1187	618.54	34345	1.455	0.813171	31.2458	-109.863	-435.5	-438.97
1188	619.09	34391.5	1.411	0.812918	31.2288	-109.814	-438	-441.45
1189	619.64	34439.5	1.443	0.812705	31.2112	-109.761	-436	-439.46
1190	620.19	34486.3	1.46	0.812435	31.1941	-109.714	-435.9	-439.36
1191	620.74	34532.7	1.445	0.812223	31.1771	-109.67	-433.5	-436.97
1192	621.29	34579.6	1.37	0.81194	31.16	-109.61	-443.2	-446.61
1193	621.84	34629.1	1.395	0.811728	31.1419	-109.536	-435.8	-439.25
1194	622.39	34677.6	1.36	0.811419	31.1242	-109.452	-439.9	-443.32
1195	622.94	34727.5	1.288	0.811206	31.1062	-109.358	-444.5	-447.89
1196	623.49	34780.1	1.268	0.810896	31.0874	-109.232	-444.5	-447.89
1197	624.04	34833.6	1.268	0.810683	31.0684	-109.086	-444.5	-447.88
1198	624.59	34887.1	1.268	0.81038	31.0501	-108.937	-444.5	-447.88
1199	625.14	34940.6	1.269	0.810168	31.032	-108.786	-444.5	-447.88
1200	625.69	34994.2	1.314	0.809884	31.0147	-108.645	-442.3	-445.69
1201	626.24	35045.8	1.39	0.809672	30.9981	-108.511	-438.5	-441.91
1202	626.79	35094.7	1.318	0.809372	30.9831	-108.411	-442.1	-445.48
1203	627.34	35146.2	1.331	0.80916	30.9673	-108.309	-441.2	-444.58
1204	627.89	35197.3	1.27	0.80888	30.9522	-108.183	-444.9	-448.26
1205	628.44	35250.8	1.328	0.808668	30.9364	-108.049	-441.9	-445.27
1206	628.99	35302	1.423	0.808406	30.922	-107.952	-436.5	-439.9
1207	629.54	35349.8	1.455	0.808194	30.9087	-107.863	-435.5	-438.91
1208	630.09	35396.6	1.395	0.807952	30.896	-107.801	-438.7	-442.08
1209	630.64	35445.4	1.535	0.807739	30.8828	-107.736	-431.6	-435.02
1210	631.19	35489.8	1.44	0.807495	30.8711	-107.702	-437.4	-440.79
1211	631.74	35537.1	1.49	0.807282	30.8585	-107.669	-433.8	-437.21
1212	632.29	35582.8	1.481	0.807043	30.8464	-107.635	-433.4	-436.81
1213	632.84	35628.9	1.462	0.80683	30.8342	-107.599	-438.3	-441.67
1214	633.39	35675.5	1.512	0.806582	30.8218	-107.567	-431.4	-434.81
1215	633.94	35720.6	1.514	0.806369	30.8098	-107.539	-431.7	-435.11
1216	634.49	35765.7	1.459	0.80614	30.7979	-107.507	-437.6	-440.97
1217	635.04	35812.4	1.458	0.805928	30.7854	-107.465	-435.6	-438.98
1218	635.59	35859.2	1.512	0.805715	30.7729	-107.429	-433.5	-436.89
1219	636.14	35904.4	1.579	0.805465	30.761	-107.416	-429.5	-432.91
1220	636.69	35947.6	1.51	0.805253	30.7495	-107.403	-433.5	-436.88
1221	637.24	35992.8	1.417	0.805024	30.7374	-107.362	-437.9	-441.25
1222	637.79	36041.1	1.509	0.804811	30.7244	-107.317	-433.7	-437.07
1223	638.34	36086.4	1.565	0.804562	30.7123	-107.298	-429.9	-433.29
1224	638.89	36130	1.52	0.80435	30.7006	-107.286	-432.5	-435.87
1225	639.44	36175	1.459	0.804106	30.6885	-107.258	-436.5	-439.85
1226	639.99	36221.9	1.439	0.803894	30.6757	-107.215	-436.9	-440.24
1227	640.54	36269.5	1.494	0.803634	30.6628	-107.175	-435.8	-439.14
1228	641.09	36315.3	1.525	0.803421	30.6505	-107.141	-428.2	-431.58
1229	641.64	36360.1	1.441	0.803174	30.6383	-107.102	-438.6	-441.92
1230	642.19	36407.7	1.398	0.802961	30.6255	-107.042	-439.5	-442.81
1231	642.74	36456.7	1.47	0.802749	30.6123	-106.982	-434.3	-437.64
1232	643.29	36503.3	1.51	0.802485	30.5999	-106.941	-433.1	-436.44
1233	643.84	36548.7	1.48	0.802273	30.5878	-106.901	-434.8	-438.13
1234	644.39	36595	1.373	0.80199	30.5756	-106.838	-439.6	-442.89
1235	644.94	36644.9	1.432	0.801778	30.5624	-106.768	-436.6	-439.91
1236	645.49	36692.8	1.307	0.801525	30.5499	-106.674	-443	-446.26
1237	646.04	36745.3	1.463	0.801312	30.5364	-106.569	-435.3	-438.61
1238	646.59	36792.2	1.459	0.80105	30.5247	-106.514	-435.6	-438.9
1239	647.14	36839.3	1.453	0.800837	30.5131	-106.464	-436	-439.29
1240	647.69	36886.6	1.432	0.800553	30.5016	-106.402	-435.8	-439.09
1241	648.24	36934.5	1.349	0.800341	30.4899	-106.335	-442	-445.25
1242	648.79	36985.5	1.366	0.800074	30.4777	-106.24	-439.7	-442.96
1243	649.34	37035.8	1.391	0.799862	30.4658	-106.135	-438.8	-442.06
1244	649.89	37085.2	1.425	0.799611	30.4545	-106.051	-437.5	-440.76
1245	650.44	37133.5	1.472	0.799399	30.4437	-105.976	-434.6	-437.87
1246	650.99	37180.3	1.475	0.799142	30.4335	-105.92	-434.6	-437.87
1247	651.54	37226.9	1.454	0.79893	30.4234	-105.873	-436.1	-439.36
1248	652.09	37274.3	1.443	0.798674	30.4133	-105.819	-436.8	-440.05
1249	652.64	37322	1.459	0.798462	30.4032	-105.761	-435.9	-439.16
1250	653.19	37369.2	1.458	0.798202	30.3933	-105.703	-434.2	-437.46
1251	653.74	37416.4	1.436	0.79799	30.3835	-105.646	-438.3	-441.54
1252	654.29	37464.4	1.442	0.797714	30.3737	-105.586	-436.1	-439.35
1253	654.84	37512.2	1.442	0.797501	30.3641	-105.522	-435.3	-438.55
1254	655.39	37560.1	1.388	0.797232	30.3546	-105.453	-439.6	-442.82
1255	655.94	37609.8	1.363	0.79702	30.345	-105.36	-440.7	-443.91
1256	656.49	37660.4	1.39	0.796807	30.3353	-105.267	-438.9	-442.12
1257	657.04	37710.1	1.458	0.796594	30.3263	-105.185	-436.7	-439.93
1258	657.59	37757.4	1.573	0.796347	30.3178	-105.12	-429.6	-432.87
1259	658.14	37801.3	1.65	0.796134	30.3103	-105.126	-427.3	-430.58
1260	658.69	37843.2	1.478	0.795922	30.3031	-105.132	-435.1	-438.33
1261	659.24	37889.9	1.477	0.795696	30.2949	-105.095	-434.9	-438.13
1262	659.79	37936.7	1.511	0.795483	30.2866	-105.049	-435	-438.23
1263	660.34	37982.5	1.577	0.795258	30.2787	-105.027	-427.3	-430.57
1264	660.89	38026.3	1.573	0.795045	30.2711	-105.014	-434.4	-437.63
1265	661.44	38070.3	1.547	0.794813	30.2635	-105.003	-428.6	-431.86
1266	661.99	38115	1.552	0.7946	30.2557	-104.992	-435.1	-438.32
1267	662.54	38159.7	1.557	0.794391	30.2479	-104.979	-428.6	-431.86
1268	663.09	38204.1	1.494	0.794179	30.2401	-104.957	-436.5	-439.71
1269	663.64	38250.5	1.603	0.793967	30.2319	-104.935	-428.7	-431.95
1270	664.19	38293.7	1.604	0.793797	30.2243	-104.948	-430.7	-433.94
1271	664.74	38336.9	1.722	0.793585	30.2167	-104.961	-423.8	-427.08
1272	665.29	38377.1	1.737	0.793435	30.2094	-105.008	-424.6	-427.87
1273	665.84	38417	1.767	0.793223	30.202	-105.072	-425.2	-428.46
1274	666.39	38456.3	1.863	0.79301	30.1947	-105.138	-418.3	-421.6
1275	666.94	38493.5	1.745	0.792874	30.1872	-105.223	-426	-429.26
1276	667.49	38533.2	1.885	0.792661	30.1791	-105.313	-418.8	-422.09
1277	668.04	38570.1	1.899	0.792436	30.1711	-105.405	-415.4	-418.71
1278	668.59	38606.6	1.795	0.792224	30.1628	-105.505	-424.5	-427.76
1279	669.14	38645.3	1.583	0.792011	30.1539	-105.609	-430.6	-433.82
1280	669.69	38689.1	1.556	0.791818	30.1427	-105.617	-431	-434.22
1281	670.24	38733.8	1.564	0.791605	30.1312	-105.61	-434.8	-437.99
1282	670.79	38778.2	1.711	0.791397	30.1195	-105.633	-423.4	-426.66
1283	671.34	38818.8	1.754	0.791184	30.1088	-105.669	-420.5	-423.77
1284	671.89	38858.5	1.644	0.790974	30.0982	-105.7	-430.4	-433.61
1285	672.44	38900.8	1.571	0.790761	30.0864	-105.717	-431.1	-434.31
1286	672.99	38945	1.536	0.790549	30.074	-105.735	-433.4	-436.59
1287	673.54	38990.3	1.711	0.79035	30.061	-105.752	-422.5	-425.75
1288	674.09	39031	1.66	0.790137	30.0492	-105.766	-431.3	-434.5
1289	674.64	39072.9	1.659	0.789933	30.0368	-105.79	-425.3	-428.54
1290	675.19	39114.9	1.67	0.78972	30.0242	-105.822	-427	-430.22
1291	675.74	39156.6	1.624	0.78953	30.0115	-105.852	-429.8	-433.01
1292	676.29	39199.5	1.66	0.789318	29.998	-105.877	-427.3	-430.52
1293	676.84	39241.5	1.699	0.789105	29.9848	-105.902	-425.9	-429.13
1294	677.39	39282.5	1.703	0.788894	29.9715	-105.942	-426	-429.23
1295	677.94	39323.4	1.685	0.788681	29.9581	-105.986	-425.6	-428.83
1296	678.49	39364.8	1.643	0.788467	29.9442	-106.02	-428.5	-431.71
1297	679.04	39407.3	1.584	0.788255	29.9295	-106.036	-430.7	-433.9
1298	679.59	39451.3	1.545	0.788048	29.9142	-106.053	-432.8	-435.98
1299	680.14	39496.5	1.714	0.787836	29.8981	-106.067	-424.4	-427.63
1300	680.69	39537.2	1.65	0.787623	29.8835	-106.08	-428.9	-432.1
1301	681.24	39579.5	1.666	0.7874	29.8679	-106.102	-427.1	-430.31
1302	681.79	39621.4	1.628	0.787187	29.8524	-106.126	-426.3	-429.51
1303	682.34	39664.4	1.576	0.786961	29.8363	-106.144	-434.3	-437.47
1304	682.89	39708.7	1.613	0.786748	29.8192	-106.145	-428.8	-432
1305	683.44	39752	1.737	0.786483	29.8025	-106.147	-423.2	-426.43
1306	683.99	39792.3	1.47	0.78627	29.7866	-106.144	-436	-439.15
1307	684.54	39839.9	1.488	0.786002	29.7677	-106.141	-434	-437.16
1308	685.09	39886.9	1.445	0.785789	29.7488	-106.091	-436.9	-440.05
1309	685.64	39935.4	1.453	0.785518	29.7292	-106.027	-436	-439.15
1310	686.19	39983.5	1.458	0.785306	29.7098	-105.959	-435.5	-438.65
1311	686.74	40031.6	1.447	0.785011	29.6904	-105.89	-436.9	-440.04
1312	687.29	40080	1.457	0.784798	29.671	-105.818	-435.5	-438.65
1313	687.84	40128.1	1.428	0.784491	29.6517	-105.745	-435.9	-439.05
1314	688.39	40177.2	1.349	0.784278	29.6322	-105.648	-441.9	-445.01
1315	688.94	40229.2	1.31	0.783984	29.6115	-105.527	-443	-446.1
1316	689.49	40282.7	1.33	0.783771	29.5907	-105.39	-442.4	-445.5
1317	690.04	40335.5	1.399	0.783497	29.5703	-105.246	-436.8	-439.93
1318	690.59	40385.7	1.333	0.783284	29.5515	-105.123	-443.3	-446.4
1319	691.14	40438.3	1.452	0.783022	29.532	-104.999	-434.7	-437.84
1320	691.69	40486.7	1.419	0.78281	29.5145	-104.91	-438.7	-441.82
1321	692.24	40536.2	1.473	0.78255	29.4967	-104.827	-434.2	-437.34
1322	692.79	40583.9	1.478	0.782338	29.4798	-104.76	-436.5	-439.63
1323	693.34	40631.5	1.512	0.78207	29.4631	-104.7	-430.9	-434.06
1324	693.89	40678	1.476	0.781857	29.4467	-104.643	-437.3	-440.42
1325	694.44	40725.7	1.484	0.781574	29.43	-104.586	-434.2	-437.34
1326	694.99	40773.1	1.474	0.781361	29.4135	-104.523	-433.3	-436.44
1327	695.54	40820.9	1.413	0.781106	29.3969	-104.453	-439.6	-442.71
1328	696.09	40870.7	1.389	0.780893	29.3796	-104.368	-439	-442.11
1329	696.64	40921.4	1.442	0.780632	29.3622	-104.265	-438.3	-441.41
1330	697.19	40970.3	1.514	0.780419	29.3456	-104.186	-430.9	-434.05
1331	697.74	41016.8	1.549	0.780122	29.3301	-104.137	-433	-436.14
1332	698.29	41062.3	1.513	0.779909	29.3149	-104.085	-431.3	-434.45
1333	698.84	41108.9	1.413	0.779611	29.2994	-104.026	-439.1	-442.2
1334	699.39	41158.9	1.355	0.779399	29.2828	-103.951	-441.2	-444.29
1335	699.94	41210.9	1.359	0.779109	29.2656	-103.821	-440.2	-443.3
1336	700.49	41262.9	1.361	0.778896	29.2487	-103.692	-440.1	-443.19
1337	701.04	41314.8	1.366	0.778601	29.2323	-103.561	-440.8	-443.89
1338	701.59	41366.5	1.398	0.778389	29.2162	-103.435	-438.4	-441.5
1339	702.14	41417.1	1.389	0.778118	29.201	-103.32	-436.7	-439.81
1340	702.69	41467.9	1.352	0.777905	29.186	-103.202	-444.3	-447.37
1341	703.24	41520.2	1.401	0.777641	29.1709	-103.074	-436.8	-439.91
1342	703.79	41570.7	1.46	0.777428	29.1567	-102.967	-436	-439.11
1343	704.34	41619.2	1.488	0.777188	29.1435	-102.887	-434.5	-437.62
1344	704.89	41666.7	1.475	0.776975	29.1307	-102.811	-433.3	-436.42
1345	705.44	41714.7	1.456	0.77673	29.118	-102.741	-439.4	-442.48
1346	705.99	41763.4	1.538	0.776518	29.1052	-102.68	-431.7	-434.82
1347	706.54	41809.4	1.625	0.776305	29.0933	-102.65	-426.5	-429.65
1348	707.09	41853	1.547	0.776029	29.082	-102.621	-433.2	-436.31
1349	707.64	41898.9	1.515	0.775816	29.0702	-102.583	-433.4	-436.51
1350	708.19	41945.7	1.482	0.775556	29.0581	-102.545	-434.9	-438
1351	708.74	41993.5	1.384	0.775343	29.0457	-102.461	-439.4	-442.47
1352	709.29	42044.8	1.615	0.775063	29.0325	-102.366	-427.8	-430.93
1353	709.84	42088.7	1.381	0.77485	29.0216	-102.305	-441	-444.05
1354	710.39	42140.1	1.462	0.774572	29.0089	-102.236	-434.7	-437.78
1355	710.94	42188.6	1.378	0.774359	28.9971	-102.144	-440.4	-443.45
1356	711.49	42240.2	1.452	0.774065	28.9846	-102.039	-435.7	-438.77
1357	712.04	42289.1	1.421	0.773852	28.9733	-101.943	-437.3	-440.36
1358	712.59	42339.1	1.339	0.773553	28.9618	-101.846	-441.9	-444.93
1359	713.14	42392.2	1.403	0.77325	28.9501	-101.718	-438.2	-441.25
1360	713.69	42442.9	1.351	0.773037	28.9391	-101.591	-440.9	-443.93
1361	714.24	42495.6	1.357	0.772739	28.9284	-101.45	-440.5	-443.53
1362	714.79	42548	1.351	0.772526	28.9179	-101.309	-440.6	-443.62
1363	715.34	42600.7	1.321	0.772247	28.9083	-101.158	-442.5	-445.51
1364	715.89	42654.6	1.338	0.772034	28.8987	-101.004	-442.4	-445.41
1365	716.44	42707.9	1.385	0.771763	28.8902	-100.86	-437.4	-440.43
1366	716.99	42759.3	1.393	0.77155	28.8822	-100.726	-441.5	-444.51
1367	717.54	42810.5	1.458	0.771295	28.875	-100.618	-433.2	-436.25
1368	718.09	42859.4	1.444	0.771082	28.8684	-100.517	-437.2	-440.23
1369	718.64	42908.8	1.434	0.770816	28.8623	-100.426	-438.3	-441.32
1370	719.19	42958.6	1.494	0.770604	28.8563	-100.339	-433.3	-436.34
1371	719.74	43006.3	1.513	0.770342	28.851	-100.276	-433.4	-436.44
1372	720.29	43053.5	1.479	0.770129	28.8459	-100.212	-434.7	-437.73
1373	720.84	43101.8	1.429	0.76987	28.841	-100.13	-438.9	-441.91
1374	721.39	43151.8	1.535	0.769657	28.836	-100.046	-430.8	-433.85
1375	721.94	43198.4	1.409	0.769429	28.832	-99.9729	-439.3	-442.3
1376	722.49	43249.1	1.493	0.769216	28.8275	-99.8935	-433.8	-436.83
1377	723.04	43297	1.467	0.769003	28.8239	-99.8218	-435.8	-438.82
1378	723.59	43345.7	1.538	0.768779	28.8202	-99.749	-432.6	-435.63
1379	724.14	43392.2	1.625	0.768566	28.8171	-99.7231	-428.6	-431.65
1380	724.69	43436.3	1.597	0.768347	28.8143	-99.7028	-430.5	-433.54
1381	725.24	43481.1	1.587	0.768134	28.8115	-99.6855	-430.2	-433.24
1382	725.79	43526.2	1.6	0.767904	28.8088	-99.6697	-431.3	-434.33
1383	726.34	43571	1.623	0.767692	28.806	-99.6579	-427.8	-430.84
1384	726.89	43615.1	1.608	0.767432	28.8034	-99.6507	-429.1	-432.14
1385	727.44	43659.7	1.565	0.76722	28.8007	-99.64	-433.2	-436.21
1386	727.99	43705.5	1.58	0.767003	28.798	-99.6168	-429.1	-432.13
1387	728.54	43750.9	1.47	0.76679	28.7953	-99.5928	-436.4	-439.39
1388	729.09	43799.7	1.478	0.766538	28.7925	-99.5183	-435.8	-438.79
1389	729.64	43848.2	1.657	0.766326	28.7897	-99.4442	-426.9	-429.93
1390	730.19	43891.5	1.602	0.766113	28.7878	-99.4379	-429.7	-432.72
1391	730.74	43936.3	1.539	0.765861	28.7858	-99.434	-432.3	-435.3
1392	731.29	43983	1.477	0.765648	28.7837	-99.3902	-435.6	-438.58
1393	731.84	44031.7	1.469	0.765399	28.7815	-99.3273	-436.6	-439.57
1394	732.39	44080.6	1.515	0.765186	28.7796	-99.2636	-432.4	-435.39
1395	732.94	44128	1.512	0.764917	28.778	-99.2015	-433.6	-436.58
1396	733.49	44175.6	1.509	0.764704	28.7767	-99.1416	-435.1	-438.07
1397	734.04	44223.2	1.498	0.764437	28.7756	-99.0836	-431.5	-434.48
1398	734.59	44271.2	1.427	0.764225	28.7747	-99.0107	-438.8	-441.74
1399	735.14	44321.7	1.401	0.76395	28.774	-98.9149	-440.4	-443.33
1400	735.69	44373.1	1.46	0.763737	28.7738	-98.8184	-434.5	-437.46
1401	736.24	44422.4	1.463	0.763455	28.774	-98.7271	-434.5	-437.45
1402	736.79	44471.6	1.402	0.763243	28.7745	-98.6296	-439.8	-442.72
1403	737.34	44523	1.386	0.762954	28.7756	-98.5196	-440	-442.92
1404	737.89	44575.1	1.4	0.762688	28.7772	-98.4019	-437.2	-440.13
1405	738.44	44626.6	1.367	0.762475	28.7793	-98.2786	-441	-443.91
1406	738.99	44679.4	1.355	0.762225	28.7822	-98.1451	-441.1	-444
1407	739.54	44732.6	1.39	0.762013	28.7856	-98.0047	-439.1	-442.01
1408	740.09	44784.6	1.448	0.761742	28.7898	-97.8922	-437.1	-440.02
1409	740.64	44834.4	1.533	0.76153	28.7942	-97.796	-431.2	-434.15
1410	741.19	44881.5	1.483	0.761271	28.7991	-97.7225	-434.7	-437.63
1411	741.74	44930.2	1.413	0.761058	28.8044	-97.6555	-439.4	-442.3
1412	742.29	44981.4	1.417	0.760808	28.8104	-97.5622	-437.3	-440.21
1413	742.84	45032.4	1.419	0.760596	28.8168	-97.4547	-438.6	-441.5
1414	743.39	45083.4	1.469	0.760348	28.8239	-97.36	-435.3	-438.21
1415	743.94	45132.6	1.495	0.760136	28.8311	-97.2748	-433.8	-436.72
1416	744.49	45181	1.475	0.759893	28.8388	-97.2004	-435.9	-438.81
1417	745.04	45230.1	1.476	0.759681	28.8469	-97.1301	-435.2	-438.11
1418	745.59	45279.2	1.487	0.759452	28.8556	-97.0609	-435.1	-438.01
1419	746.14	45327.9	1.502	0.75924	28.8645	-96.9932	-433.8	-436.71
1420	746.69	45376.1	1.499	0.759028	28.8738	-96.9304	-434.3	-437.2
1421	747.24	45424.4	1.509	0.758817	28.8835	-96.8713	-434.9	-437.8
1422	747.79	45472.5	1.548	0.758605	28.8935	-96.8232	-431.5	-434.41
1423	748.34	45519.3	1.594	0.758393	28.9036	-96.7882	-431.1	-434.01
1424	748.89	45564.8	1.617	0.758181	28.9137	-96.7631	-428	-430.93
1425	749.44	45609.7	1.604	0.757982	28.924	-96.7564	-430.7	-433.61
1426	749.99	45654.9	1.596	0.75777	28.9344	-96.7493	-430.3	-433.21
1427	750.54	45700.4	1.607	0.75757	28.9451	-96.7397	-429.9	-432.81
1428	751.09	45745.6	1.653	0.757357	28.9558	-96.7302	-427.9	-430.82
1429	751.64	45789.5	1.637	0.757174	28.9665	-96.7387	-429.1	-432.01
1430	752.19	45833.9	1.643	0.756961	28.9773	-96.7494	-427.5	-430.42
1431	752.74	45878.1	1.617	0.756749	28.9882	-96.7584	-430.3	-433.2
1432	753.29	45923	1.678	0.756565	28.9994	-96.7664	-429.8	-432.7
1433	753.84	45966.3	1.722	0.756353	29.0102	-96.7833	-419.9	-422.85
1434	754.39	46008.6	1.674	0.7562	29.0209	-96.8142	-430.7	-433.59
1435	754.94	46052	1.697	0.755987	29.0319	-96.846	-425.5	-428.42
1436	755.49	46094.9	1.665	0.755775	29.0427	-96.8774	-428.5	-431.4
1437	756.04	46138.6	1.799	0.755643	29.0537	-96.9094	-420.9	-423.84
1438	756.59	46179	1.811	0.755431	29.0639	-96.9699	-424.4	-427.32
1439	757.14	46219.2	1.786	0.75527	29.0741	-97.0421	-420.4	-423.34
1440	757.69	46260	1.796	0.755058	29.0843	-97.1227	-426	-428.91
1441	758.24	46300.6	1.991	0.754901	29.0941	-97.2256	-413.7	-416.67
1442	758.79	46337.2	1.871	0.754688	29.103	-97.3184	-419.1	-422.04
1443	759.34	46376.1	1.748	0.754476	29.112	-97.3921	-424.5	-427.41
1444	759.89	46417.8	1.698	0.754302	29.1214	-97.4575	-429.5	-432.38
1445	760.44	46460.7	1.754	0.754089	29.131	-97.5263	-423.1	-426.01
1446	760.99	46502.3	1.859	0.753924	29.14	-97.5964	-419.7	-422.63
1447	761.54	46541.6	1.711	0.753712	29.1485	-97.6627	-426.6	-429.49
1448	762.09	46584.2	1.733	0.753499	29.1575	-97.7147	-424.6	-427.5
1449	762.64	46626.3	1.735	0.753376	29.1662	-97.7613	-425	-427.9
1450	763.19	46668.4	1.749	0.753163	29.1748	-97.8138	-425.4	-428.29
1451	763.74	46710.2	1.784	0.753054	29.1833	-97.8737	-422.5	-425.4
1452	764.29	46751.1	1.81	0.752842	29.1916	-97.934	-422.6	-425.5
1453	764.84	46791.5	1.962	0.752629	29.1994	-98.0494	-417.3	-420.23
1454	765.39	46828.7	2.03	0.752492	29.2067	-98.1559	-415.6	-418.54
1455	765.94	46864.7	2.029	0.75228	29.2134	-98.2668	-412.3	-415.25
1456	766.49	46900.8	1.856	0.752116	29.2197	-98.3893	-422.1	-425
1457	767.04	46940.2	1.859	0.751904	29.2265	-98.5231	-421.3	-424.2
1458	767.59	46979.5	1.859	0.751691	29.2326	-98.629	-418.9	-421.81
1459	768.14	47018.9	1.861	0.7515	29.2384	-98.7256	-422.3	-425.2
1460	768.69	47058.2	1.845	0.751288	29.244	-98.815	-419.7	-422.61
1461	769.24	47097.9	1.679	0.751106	29.2491	-98.8773	-427.8	-430.67
1462	769.79	47141.5	1.668	0.750893	29.2547	-98.9457	-427.2	-430.07
1463	770.34	47185.4	1.664	0.750704	29.26	-98.9807	-429.5	-432.35
1464	770.89	47229.4	1.712	0.750491	29.2652	-99.0076	-423.5	-426.38
1465	771.44	47272.2	1.711	0.750279	29.2702	-99.0412	-426.9	-429.77
1466	771.99	47315.1	1.695	0.750089	29.2751	-99.0815	-426.9	-429.76
1467	772.54	47358.3	1.704	0.749877	29.28	-99.1201	-425.3	-428.17
1468	773.09	47401.4	1.649	0.749708	29.2847	-99.1495	-428.8	-431.65
1469	773.64	47445.9	1.634	0.749496	29.2896	-99.1799	-429.1	-431.95
1470	774.19	47490.8	1.705	0.749294	29.2944	-99.2105	-425.7	-428.57
1471	774.74	47533.8	1.758	0.749081	29.299	-99.2397	-426.9	-429.76
1472	775.29	47575.6	1.776	0.748877	29.3033	-99.2872	-418	-420.9
1473	775.84	47617	1.73	0.748664	29.3076	-99.3462	-428.3	-431.15
1474	776.39	47659.4	1.638	0.748452	29.3118	-99.3958	-428.1	-430.95
1475	776.94	47704.3	1.601	0.748243	29.316	-99.4073	-431.2	-434.04
1476	777.49	47750.2	1.649	0.748031	29.3202	-99.4191	-427.8	-430.65
1477	778.04	47794.8	1.607	0.747834	29.3243	-99.4275	-430.1	-432.94
1478	778.59	47840.6	1.631	0.747622	29.3286	-99.4361	-428.7	-431.55
1479	779.14	47885.7	1.598	0.747409	29.3328	-99.4392	-430.3	-433.14
1480	779.69	47931.7	1.609	0.747196	29.337	-99.441	-431.5	-434.33
1481	780.24	47977.5	1.678	0.746976	29.3414	-99.4542	-425.7	-428.56
1482	780.79	48021.4	1.675	0.746763	29.3455	-99.4743	-425.9	-428.76
1483	781.34	48065.3	1.593	0.746499	29.3497	-99.4856	-431.1	-433.94
1484	781.89	48111.6	1.553	0.746287	29.354	-99.48	-434.3	-437.12
1485	782.44	48159.1	1.598	0.746027	29.3585	-99.4719	-428.2	-431.06
1486	782.99	48205.2	1.537	0.745815	29.3629	-99.4543	-431.8	-434.64
1487	783.54	48253.2	1.384	0.745567	29.3676	-99.4312	-442.1	-444.89
1488	784.09	48306.4	1.435	0.745355	29.3731	-99.3298	-435.9	-438.72
1489	784.64	48357.9	1.438	0.745128	29.3785	-99.233	-436.5	-439.32
1490	785.19	48409.2	1.412	0.744915	29.3848	-99.1421	-439.7	-442.51
1491	785.74	48461.5	1.463	0.744712	29.3914	-99.0541	-436	-438.83
1492	786.29	48512	1.507	0.744499	29.3986	-98.9851	-432.2	-435.05
1493	786.84	48561	1.515	0.744282	29.4057	-98.9256	-436.3	-439.13
1494	787.39	48609.8	1.584	0.744069	29.4134	-98.8923	-429.1	-431.97
1495	787.94	48656.4	1.625	0.74382	29.4208	-98.8658	-429.3	-432.17
1496	788.49	48702	1.621	0.743608	29.4285	-98.8723	-429.1	-431.97
1497	789.04	48747.6	1.558	0.743372	29.4361	-98.8789	-432.2	-435.06
1498	789.59	48795.1	1.588	0.743159	29.4442	-98.8632	-430.3	-433.17
1499	790.14	48841.7	1.393	0.742926	29.4522	-98.8466	-439.5	-442.32
1500	790.69	48894.8	1.512	0.742714	29.4616	-98.7774	-433.7	-436.56
1501	791.24	48943.8	1.594	0.74251	29.4704	-98.705	-429.9	-432.78
1502	791.79	48990.3	1.421	0.742297	29.4794	-98.6544	-438.3	-441.13
1503	792.34	49042.4	1.431	0.742085	29.4896	-98.6007	-437.4	-440.24
1504	792.89	49094.2	1.584	0.741855	29.5005	-98.5519	-430.8	-433.67
1505	793.44	49141.1	1.603	0.741643	29.5103	-98.5084	-430.4	-433.28
1506	793.99	49187.3	1.63	0.741404	29.5206	-98.502	-427.5	-430.39
1507	794.54	49232.8	1.536	0.741192	29.5308	-98.5043	-433.8	-436.66
1508	795.09	49281.2	1.503	0.740956	29.5418	-98.4785	-434.4	-437.26
1509	795.64	49330.5	1.492	0.740743	29.5532	-98.4364	-433.9	-436.76
1510	796.19	49380.3	1.468	0.7405	29.565	-98.3845	-437.4	-440.24
1511	796.74	49430.9	1.508	0.740271	29.5773	-98.3256	-432	-434.87
1512	797.29	49480.2	1.477	0.740058	29.5898	-98.2699	-436.7	-439.55
1513	797.84	49530.5	1.472	0.739849	29.6029	-98.2142	-434.2	-437.06
1514	798.39	49581	1.441	0.739636	29.6166	-98.1503	-438.8	-441.64
1515	798.94	49632.6	1.502	0.739424	29.6309	-98.0798	-432.5	-435.37
1516	799.49	49682.1	1.492	0.739216	29.6452	-98.0268	-436.2	-439.05
1517	800.04	49732	1.563	0.739004	29.66	-97.9814	-431.3	-434.18
1518	800.59	49779.6	1.593	0.738792	29.6745	-97.9583	-428.8	-431.69
1519	801.14	49826.3	1.547	0.73858	29.6891	-97.9478	-433.6	-436.47
1520	801.69	49874.5	1.578	0.738369	29.7044	-97.9378	-433.1	-435.97
1521	802.24	49921.7	1.613	0.738157	29.7196	-97.9289	-424.9	-427.81
1522	802.79	49967.9	1.555	0.737929	29.7347	-97.918	-434.6	-437.46
1523	803.34	50015.8	1.541	0.737717	29.7506	-97.9031	-434.4	-437.26
1524	803.89	50064.2	1.585	0.737512	29.7668	-97.8883	-427.1	-430
1525	804.44	50111.3	1.546	0.737299	29.7829	-97.8748	-434.4	-437.26
1526	804.99	50159.5	1.497	0.737113	29.7996	-97.855	-433.3	-436.17
1527	805.54	50209.4	1.482	0.736901	29.8173	-97.8095	-437.5	-440.34
1528	806.09	50259.8	1.562	0.736691	29.8353	-97.771	-430.7	-433.58
1529	806.64	50307.6	1.628	0.736479	29.8531	-97.7641	-428.2	-431.09
1530	807.19	50353.4	1.62	0.736271	29.8702	-97.7598	-430.1	-432.98
1531	807.74	50399.6	1.662	0.736059	29.8878	-97.7841	-427.3	-430.19
1532	808.29	50444.5	1.592	0.73588	29.905	-97.8079	-430.5	-433.38
1533	808.84	50491.5	1.52	0.735668	29.9232	-97.7975	-433.6	-436.46
1534	809.39	50540.7	1.526	0.735458	29.9422	-97.7817	-433.4	-436.26
1535	809.94	50589.7	1.583	0.735246	29.9617	-97.7693	-430.7	-433.57
1536	810.49	50636.9	1.626	0.735046	29.9806	-97.7581	-430.7	-433.57
1537	811.04	50682.9	1.709	0.734834	29.9995	-97.7795	-422.1	-425.01
1538	811.59	50726.8	1.615	0.734622	30.0175	-97.8121	-431.4	-434.27
1539	812.14	50773.1	1.517	0.734425	30.0367	-97.8216	-433	-435.86
1540	812.69	50822.5	1.525	0.734213	30.0573	-97.8047	-437.1	-439.93
1541	813.24	50871.6	1.605	0.734009	30.078	-97.7953	-425.8	-428.69
1542	813.79	50918.3	1.606	0.733797	30.0981	-97.7952	-430.5	-433.36
1543	814.34	50965	1.575	0.73361	30.1183	-97.7964	-433.3	-436.15
1544	814.89	51012.6	1.591	0.733398	30.1393	-97.8001	-427.9	-430.77
1545	815.44	51059.7	1.557	0.733184	30.1602	-97.8016	-433.4	-436.24
1546	815.99	51107.9	1.558	0.732972	30.1819	-97.7942	-432.6	-435.45
1547	816.54	51156.1	1.621	0.732768	30.2038	-97.7902	-428.5	-431.37
1548	817.09	51202.4	1.622	0.732556	30.2253	-97.8091	-428.6	-431.46
1549	817.64	51248.7	1.497	0.732367	30.2468	-97.8281	-435.5	-438.33
1550	818.19	51298.8	1.532	0.732155	30.2704	-97.8015	-432.7	-435.54
1551	818.74	51347.9	1.541	0.731969	30.2936	-97.7743	-432.7	-435.54
1552	819.29	51396.6	1.563	0.731757	30.3174	-97.7635	-431.7	-434.54
1553	819.84	51444.7	1.601	0.731591	30.341	-97.7536	-430.1	-432.95
1554	820.39	51491.7	1.596	0.731379	30.3645	-97.7655	-430.5	-433.34
1555	820.94	51538.8	1.619	0.731199	30.3883	-97.7801	-429	-431.85
1556	821.49	51585.2	1.588	0.730987	30.412	-97.7977	-431.7	-434.54
1557	822.04	51632.6	1.646	0.73081	30.4363	-97.8166	-428	-430.85
1558	822.59	51678.3	1.698	0.730599	30.4601	-97.8541	-426.9	-429.76
1559	823.14	51722.7	1.674	0.730387	30.4833	-97.9018	-424.2	-427.07
1560	823.69	51767.6	1.626	0.730238	30.5069	-97.9422	-432.9	-435.73
1561	824.24	51814	1.599	0.730026	30.5313	-97.9711	-427.8	-430.65
1562	824.79	51861.1	1.616	0.72987	30.5562	-98.0014	-432.5	-435.33
1563	825.34	51907.7	1.673	0.729658	30.5811	-98.0342	-425	-427.86
1564	825.89	51952.8	1.685	0.729535	30.6052	-98.0688	-428.2	-431.05
1565	826.44	51997.5	1.807	0.729323	30.6294	-98.1452	-421.2	-424.08
1566	826.99	52039.3	1.65	0.729186	30.652	-98.2166	-429.2	-432.04
1567	827.54	52085	1.71	0.728974	30.6767	-98.2854	-425.9	-428.75
1568	828.09	52129.1	1.817	0.728762	30.7005	-98.3492	-424.1	-426.96
1569	828.64	52170.6	1.837	0.728588	30.7229	-98.4333	-415.9	-418.8
1570	829.19	52211.7	1.817	0.728376	30.7451	-98.5408	-426.5	-429.35
1571	829.74	52253.3	1.835	0.728211	30.7675	-98.6478	-419.7	-422.58
1572	830.29	52294.4	1.712	0.727999	30.7894	-98.7352	-425.7	-428.55
1573	830.84	52338.6	1.584	0.727852	30.8128	-98.8289	-432	-434.82
1574	831.39	52386.3	1.67	0.72764	30.8379	-98.8821	-426.2	-429.05
1575	831.94	52431.5	1.654	0.727485	30.8616	-98.9183	-429.5	-432.34
1576	832.49	52477.2	1.666	0.727274	30.8857	-98.9642	-426.2	-429.05
1577	833.04	52522.6	1.684	0.727062	30.9098	-99.0161	-428.8	-431.64
1578	833.59	52567.6	1.731	0.726923	30.9337	-99.0784	-424.7	-427.56
1579	834.14	52611.3	1.745	0.726711	30.957	-99.1556	-422.2	-425.07
1580	834.69	52654.6	1.658	0.726581	30.9802	-99.2309	-430.6	-433.43
1581	835.24	52700.3	1.731	0.726369	31.0044	-99.3001	-424.1	-426.96
1582	835.79	52744	1.716	0.726236	31.0277	-99.3663	-426.4	-429.25
1583	836.34	52788.1	1.808	0.726025	31.0511	-99.4543	-419.9	-422.78
1584	836.89	52830	1.715	0.725813	31.0733	-99.541	-428.6	-431.44
1585	837.44	52874.2	1.785	0.725649	31.0967	-99.6399	-424.9	-427.76
1586	837.99	52916.7	1.85	0.725437	31.119	-99.7409	-415.8	-418.71
1587	838.54	52957.6	1.801	0.725322	31.1405	-99.8378	-424.9	-427.76
1588	839.09	52999.8	1.728	0.725111	31.1623	-99.9351	-425.3	-428.16
1589	839.64	53043.7	1.657	0.724995	31.185	-100.037	-428	-430.85
1590	840.19	53089.4	1.637	0.724783	31.2084	-100.098	-429.2	-432.04
1591	840.74	53135.8	1.773	0.724685	31.232	-100.152	-426.2	-429.06
1592	841.29	53178.6	1.892	0.724474	31.2539	-100.254	-413.6	-416.52
1593	841.84	53218.7	1.858	0.724262	31.2744	-100.373	-422.7	-425.57
1594	842.39	53259.6	1.783	0.724175	31.2952	-100.494	-425.3	-428.16
1595	842.94	53302.2	1.877	0.723963	31.3164	-100.62	-418.6	-421.5
1596	843.49	53342.6	1.873	0.723855	31.3366	-100.74	-420.6	-423.49
1597	844.04	53383.2	1.908	0.723643	31.3563	-100.881	-418.3	-421.2
1598	844.59	53423.1	1.922	0.723432	31.3756	-101.025	-419.2	-422.09
1599	845.14	53462.6	1.931	0.723287	31.3945	-101.172	-417.8	-420.7
1600	845.69	53502	1.948	0.723075	31.4127	-101.33	-417.6	-420.5
1601	846.24	53541	1.925	0.722901	31.4308	-101.487	-418	-420.9
1602	846.79	53580.6	1.848	0.722689	31.4484	-101.623	-419.8	-422.69
1603	847.34	53621.7	1.767	0.722545	31.4664	-101.757	-425.2	-428.07
1604	847.89	53664.8	1.726	0.722333	31.4851	-101.879	-425.9	-428.76
1605	848.44	53708.9	1.702	0.722197	31.5036	-101.966	-424.6	-427.47
1606	848.99	53753.7	1.612	0.721985	31.5224	-102.051	-431.3	-434.14
1607	849.54	53800.9	1.617	0.721774	31.5419	-102.095	-429.4	-432.25
1608	850.09	53848	1.658	0.721621	31.5614	-102.138	-428.1	-430.95
1609	850.64	53894	1.817	0.721409	31.5804	-102.229	-421.3	-424.19
1610	851.19	53936	1.758	0.721244	31.5979	-102.313	-425.6	-428.47
1611	851.74	53979.3	1.768	0.721033	31.6156	-102.409	-421.3	-424.19
1612	852.29	54022.5	1.732	0.720902	31.6332	-102.508	-427.2	-430.06
1613	852.84	54066.6	1.69	0.720691	31.651	-102.6	-425.6	-428.47
1614	853.39	54111.7	1.677	0.720555	31.6689	-102.677	-428.1	-430.96
1615	853.94	54157.2	1.66	0.720343	31.6869	-102.752	-427.1	-429.97
1616	854.49	54203.2	1.649	0.720132	31.7049	-102.812	-430	-432.85
1617	855.04	54249.6	1.783	0.719959	31.7231	-102.872	-422	-424.89
1618	855.59	54292.4	1.772	0.719748	31.7398	-102.98	-423.8	-426.68
1619	856.14	54335.5	1.805	0.719561	31.7566	-103.09	-423	-425.89
1620	856.69	54377.9	1.768	0.71935	31.7727	-103.192	-420.5	-423.4
1621	857.24	54421.1	1.67	0.719161	31.789	-103.294	-430.3	-433.15
1622	857.79	54466.9	1.615	0.71895	31.806	-103.38	-429.5	-432.36
1623	858.34	54514.3	1.603	0.718748	31.8233	-103.43	-429.2	-432.06
1624	858.89	54562	1.564	0.718537	31.8407	-103.474	-432.5	-435.35
1625	859.44	54611	1.565	0.718365	31.8585	-103.499	-432.5	-435.35
1626	859.99	54659.9	1.585	0.718154	31.8764	-103.525	-428.8	-431.67
1627	860.54	54708.2	1.53	0.717995	31.8942	-103.547	-433.8	-436.64
1628	861.09	54758.3	1.498	0.717783	31.9127	-103.566	-435.5	-438.34
1629	861.64	54809.4	1.53	0.717645	31.9319	-103.565	-432.3	-435.15
1630	862.19	54859.5	1.596	0.717433	31.9507	-103.575	-432.4	-435.25
1631	862.74	54907.6	1.696	0.717273	31.9691	-103.626	-423.6	-426.5
1632	863.29	54952.8	1.683	0.717062	31.9865	-103.675	-427.6	-430.48
1633	863.84	54998.4	1.651	0.7169	32.004	-103.745	-428.6	-431.48
1634	864.39	55044.8	1.737	0.716689	32.0218	-103.816	-424.8	-427.7
1635	864.94	55089	1.763	0.716477	32.0386	-103.912	-422.7	-425.61
1636	865.49	55132.6	1.646	0.716317	32.0551	-104.01	-429.6	-432.48
1637	866.04	55179.2	1.658	0.716105	32.0725	-104.094	-428.9	-431.78
1638	866.59	55225.5	1.684	0.715924	32.0896	-104.163	-424.2	-427.11
1639	867.14	55271.2	1.645	0.715713	32.1063	-104.23	-430.3	-433.18
1640	867.69	55317.9	1.64	0.715546	32.1234	-104.298	-429.1	-431.99
1641	868.24	55364.7	1.676	0.715335	32.1404	-104.366	-426	-428.91
1642	868.79	55410.6	1.634	0.715151	32.1569	-104.434	-427.5	-430.4
1643	869.34	55457.7	1.557	0.71494	32.1739	-104.498	-434.9	-437.76
1644	869.89	55507.1	1.603	0.714727	32.1915	-104.535	-428.7	-431.6
1645	870.44	55555.1	1.639	0.714516	32.2086	-104.574	-428.6	-431.5
1646	870.99	55602.1	1.628	0.714321	32.2255	-104.633	-428.8	-431.7
1647	871.54	55649.4	1.582	0.71411	32.2424	-104.693	-431.1	-433.99
1648	872.09	55698.1	1.544	0.7139	32.2598	-104.724	-432.2	-435.09
1649	872.64	55748	1.472	0.713688	32.2775	-104.757	-435.5	-438.37
1650	873.19	55800.3	1.447	0.713486	32.2964	-104.738	-438	-440.86
1651	873.74	55853.6	1.529	0.713292	32.3156	-104.719	-431.9	-434.8
1652	874.29	55904	1.532	0.71308	32.3343	-104.731	-432.1	-435
1653	874.84	55954.3	1.454	0.712912	32.3531	-104.74	-436.8	-439.68
1654	875.39	56007.4	1.465	0.712701	32.3732	-104.722	-438.3	-441.17
1655	875.94	56060.1	1.521	0.712519	32.3934	-104.706	-428.4	-431.32
1656	876.49	56110.8	1.469	0.712308	32.4133	-104.703	-440.1	-442.97
1657	877.04	56163.4	1.507	0.712138	32.434	-104.703	-432.2	-435.11
1658	877.59	56214.7	1.588	0.711927	32.4547	-104.714	-431.7	-434.61
1659	878.14	56263.3	1.635	0.711716	32.4744	-104.737	-427	-429.94
1660	878.69	56310.6	1.594	0.71155	32.4939	-104.793	-429.2	-432.13
1661	879.24	56359.1	1.535	0.711338	32.5138	-104.845	-436.5	-439.39
1662	879.79	56409.5	1.595	0.711171	32.5345	-104.878	-427.7	-430.64
1663	880.34	56457.9	1.616	0.710959	32.5545	-104.914	-429.9	-432.83
1664	880.89	56505.8	1.591	0.710797	32.5744	-104.967	-430.5	-433.43
1665	881.44	56554.4	1.594	0.710585	32.5946	-105.021	-431.2	-434.13
1666	881.99	56603	1.649	0.710448	32.6148	-105.08	-427.7	-430.64
1667	882.54	56650	1.668	0.710237	32.6343	-105.138	-426.6	-429.55
1668	883.09	56696.4	1.548	0.710106	32.6536	-105.192	-433.6	-436.52
1669	883.64	56746.4	1.657	0.709895	32.6744	-105.251	-427	-429.95
1670	884.19	56793.2	1.585	0.709756	32.6938	-105.314	-431	-433.93
1671	884.74	56842.1	1.707	0.709545	32.7141	-105.38	-426	-428.96
1672	885.29	56887.5	1.73	0.709437	32.7329	-105.477	-424.6	-427.57
1673	885.84	56932.3	1.731	0.709226	32.7515	-105.579	-427.2	-430.15
1674	886.39	56977.1	1.765	0.709015	32.7697	-105.689	-419.7	-422.69
1675	886.94	57021.1	1.722	0.708912	32.7875	-105.801	-428.8	-431.75
1676	887.49	57066.1	1.695	0.708701	32.8054	-105.912	-425.3	-428.27
1677	888.04	57111.9	1.737	0.708565	32.8233	-106.016	-426	-428.96
1678	888.59	57156.6	1.802	0.708354	32.8407	-106.125	-422.1	-425.09
1679	889.14	57199.7	1.889	0.708203	32.857	-106.273	-418.9	-421.9
1680	889.69	57240.8	1.793	0.707992	32.8727	-106.413	-423.7	-426.68
1681	890.24	57284.1	1.888	0.707863	32.8884	-106.568	-417.5	-420.51
1682	890.79	57325.3	1.858	0.707652	32.9031	-106.717	-421.9	-424.89
1683	891.34	57367.1	1.732	0.707522	32.9177	-106.848	-421.2	-424.2
1684	891.89	57412	1.614	0.707311	32.9327	-106.958	-434.6	-437.53
1685	892.44	57460.2	1.642	0.7071	32.9487	-107.07	-427.7	-430.67
1686	892.99	57507.5	1.752	0.706956	32.9639	-107.161	-423.5	-426.5
1687	893.54	57551.9	1.792	0.706745	32.9781	-107.247	-422.2	-425.2
1688	894.09	57595.4	1.708	0.706588	32.9917	-107.364	-426.3	-429.29
1689	894.64	57640.9	1.678	0.706377	33.0059	-107.486	-427.4	-430.38
1690	895.19	57687.3	1.808	0.706246	33.0198	-107.611	-422.6	-425.61
1691	895.74	57730.4	1.806	0.706034	33.0325	-107.728	-419	-422.03
1692	896.29	57773.6	1.673	0.705919	33.0448	-107.833	-429.4	-432.38
1693	896.84	57820.1	1.606	0.705708	33.0578	-107.937	-430.7	-433.68
1694	897.39	57868.7	1.648	0.70559	33.071	-108.035	-428.6	-431.6
1695	897.94	57915.9	1.707	0.705379	33.0836	-108.118	-425	-428.02
1696	898.49	57961.6	1.745	0.705168	33.0956	-108.209	-424.8	-427.82
1697	899.04	58006.3	1.762	0.705071	33.107	-108.328	-423.4	-426.44
1698	899.59	58050.6	1.769	0.704859	33.1184	-108.447	-424.2	-427.24
1699	900.14	58094.7	1.87	0.70477	33.1289	-108.592	-419	-422.07
1700	900.69	58136.4	1.729	0.704559	33.1388	-108.729	-427	-430.03
1701	901.24	58181.6	1.825	0.704347	33.1488	-108.877	-419.2	-422.27
1702	901.79	58224.3	1.889	0.70423	33.158	-109.016	-423.4	-426.45
1703	902.34	58265.7	1.889	0.704019	33.1665	-109.163	-413.9	-417.01
1704	902.89	58307	1.869	0.703932	33.1744	-109.328	-423.7	-426.76
1705	903.44	58348.8	1.911	0.703721	33.1823	-109.496	-417.6	-420.7
1706	903.99	58389.7	1.93	0.703623	33.1889	-109.672	-416.9	-420.01
1707	904.54	58430.2	1.836	0.703412	33.1953	-109.848	-422.6	-425.68
1708	905.09	58472.8	1.785	0.703201	33.2013	-110.01	-421.4	-424.49
1709	905.64	58516.6	1.814	0.703096	33.2067	-110.156	-426	-429.07
1710	906.19	58559.8	1.906	0.702885	33.2118	-110.312	-416.3	-419.42
1711	906.74	58600.8	2.016	0.702759	33.2157	-110.498	-414.9	-418.03
1712	907.29	58639.7	1.908	0.702548	33.2195	-110.673	-418.5	-421.62
1713	907.84	58680.7	1.869	0.702424	33.2222	-110.848	-420	-423.11
1714	908.39	58722.6	1.886	0.702213	33.2247	-111.022	-421.2	-424.31
1715	908.94	58764.1	1.882	0.702097	33.2266	-111.191	-416.6	-419.74
1716	909.49	58805.7	1.836	0.701886	33.2275	-111.354	-422.9	-426.01
1717	910.04	58848.4	1.805	0.701675	33.2284	-111.521	-422.1	-425.22
1718	910.59	58891.9	1.768	0.70154	33.2279	-111.66	-423.8	-426.91
1719	911.14	58936.2	1.805	0.701329	33.2273	-111.801	-422	-425.13
1720	911.69	58979.7	1.801	0.701211	33.2258	-111.942	-422.7	-425.83
1721	912.24	59023.2	1.81	0.700999	33.224	-112.085	-422.1	-425.23
1722	912.79	59066.6	1.836	0.700842	33.2216	-112.233	-421.5	-424.64
1723	913.34	59109.3	1.866	0.70063	33.2185	-112.388	-419.7	-422.85
1724	913.89	59151.4	1.864	0.700503	33.2154	-112.54	-419.4	-422.56
1725	914.44	59193.5	1.626	0.700291	33.2108	-112.664	-429.8	-432.9
1726	914.99	59241.8	1.983	0.70008	33.2056	-112.805	-414.3	-417.49
1727	915.54	59281.4	1.79	0.699929	33.2004	-112.943	-424.2	-427.34
1728	916.09	59325.3	1.695	0.699718	33.1943	-113.101	-424.8	-427.94
1729	916.64	59371.7	1.658	0.699558	33.1872	-113.237	-431.1	-434.21
1730	917.19	59419.1	1.766	0.699346	33.1789	-113.34	-423.8	-426.96
1731	917.74	59463.6	1.852	0.699202	33.1709	-113.452	-416	-419.2
1732	918.29	59506.1	1.782	0.69899	33.1625	-113.592	-424.9	-428.06
1733	918.84	59550.2	1.703	0.698855	33.1537	-113.738	-426.5	-429.65
1734	919.39	59596.5	1.741	0.698644	33.143	-113.852	-424.3	-427.47
1735	919.94	59641.7	1.786	0.698475	33.1324	-113.964	-422.2	-425.39
1736	920.49	59685.8	1.615	0.698264	33.1212	-114.062	-430.1	-433.25
1737	921.04	59734.6	1.667	0.698052	33.1084	-114.168	-428.6	-431.76
1738	921.59	59781.8	1.827	0.697879	33.0952	-114.29	-419	-422.22
1739	922.14	59825	1.82	0.697668	33.0828	-114.41	-422.5	-425.7
1740	922.69	59868.3	1.804	0.697472	33.0698	-114.537	-422.6	-425.8
1741	923.24	59912	1.753	0.697261	33.0558	-114.674	-421.4	-424.61
1742	923.79	59957	1.663	0.69708	33.0411	-114.808	-430.8	-433.96
1743	924.34	60004.5	1.676	0.696869	33.0242	-114.9	-425.2	-428.4
1744	924.89	60051.5	1.669	0.696672	33.0074	-114.992	-427.8	-430.99
1745	925.44	60098.8	1.658	0.696461	32.9892	-115.078	-427.1	-430.29
1746	925.99	60146.5	1.591	0.696282	32.971	-115.165	-430.6	-433.78
1747	926.54	60196.1	1.578	0.69607	32.9507	-115.217	-431.1	-434.28
1748	927.09	60246.2	1.629	0.695906	32.9302	-115.266	-428.6	-431.79
1749	927.64	60294.7	1.665	0.695694	32.9094	-115.341	-427	-430.21
1750	928.19	60342.2	1.557	0.695517	32.8891	-115.416	-432	-435.18
1751	928.74	60393	1.623	0.695305	32.8662	-115.472	-428.9	-432.1
1752	929.29	60441.8	1.729	0.695104	32.844	-115.522	-424.5	-427.73
1753	929.84	60487.5	1.593	0.694893	32.8225	-115.593	-430.6	-433.79
1754	930.39	60537.2	1.669	0.694701	32.7988	-115.678	-427.4	-430.61
1755	930.94	60584.6	1.767	0.694489	32.7754	-115.778	-423.4	-426.64
1756	931.49	60629.5	1.752	0.694291	32.7528	-115.879	-421.7	-424.95
1757	932.04	60674.7	1.647	0.69408	32.7293	-115.97	-430.4	-433.6
1758	932.59	60722.8	1.612	0.693881	32.7035	-116.057	-428.5	-431.71
1759	933.14	60772	1.586	0.69367	32.6765	-116.127	-430.5	-433.71
1760	933.69	60822	1.581	0.693471	32.6482	-116.175	-432.2	-435.4
1761	934.24	60872.1	1.648	0.69326	32.6193	-116.231	-427.1	-430.33
1762	934.79	60920.3	1.67	0.69305	32.5909	-116.295	-425.7	-428.94
1763	935.34	60967.8	1.602	0.692838	32.5625	-116.354	-429.8	-433.02
1764	935.89	61017.3	1.578	0.692619	32.5319	-116.41	-433.7	-436.9
1765	936.44	61067.7	1.629	0.692407	32.5005	-116.467	-425.5	-428.75
1766	936.99	61116.4	1.64	0.692183	32.4692	-116.522	-429.8	-433.03
1767	937.54	61164.8	1.624	0.691971	32.4377	-116.578	-428.1	-431.34
1768	938.09	61213.8	1.608	0.691751	32.405	-116.635	-429.5	-432.74
1769	938.64	61263.2	1.58	0.691539	32.3716	-116.688	-430.9	-434.14
1770	939.19	61313.6	1.58	0.691312	32.3365	-116.726	-431.3	-434.54
1771	939.74	61363.9	1.566	0.691101	32.3012	-116.76	-429	-432.25
1772	940.29	61414.8	1.513	0.690872	32.2645	-116.783	-435.7	-438.92
1773	940.84	61467.4	1.536	0.690621	32.2262	-116.803	-432.6	-435.84
1774	941.39	61519.2	1.587	0.69041	32.1877	-116.816	-428.7	-431.97
1775	941.94	61569.4	1.561	0.690141	32.15	-116.833	-431.6	-434.86
1776	942.49	61620.4	1.526	0.68993	32.111	-116.856	-433.6	-436.85
1777	943.04	61672.7	1.544	0.689673	32.0705	-116.874	-432.1	-435.36
1778	943.59	61724.3	1.563	0.689461	32.0298	-116.885	-430.5	-433.78
1779	944.14	61775.4	1.535	0.689207	31.9891	-116.895	-432.7	-435.97
1780	944.69	61827.3	1.499	0.688995	31.947	-116.904	-433.6	-436.87
1781	945.24	61880.6	1.437	0.688725	31.9032	-116.888	-437.2	-440.45
1782	945.79	61936.2	1.441	0.688448	31.857	-116.854	-436.3	-439.56
1783	946.34	61991.6	1.366	0.688236	31.8102	-116.792	-440.7	-443.94
1784	946.89	62050.1	1.442	0.68798	31.7606	-116.718	-436	-439.27
1785	947.44	62105.6	1.474	0.687768	31.7131	-116.672	-434.6	-437.89
1786	947.99	62159.8	1.467	0.687482	31.6665	-116.628	-435.3	-438.59
1787	948.54	62214.4	1.441	0.687203	31.6189	-116.588	-436.1	-439.39
1788	949.09	62269.9	1.399	0.686991	31.5702	-116.536	-438.6	-441.88
1789	949.64	62327.1	1.367	0.686706	31.5194	-116.461	-440.2	-443.47
1790	950.19	62385.7	1.403	0.686494	31.4671	-116.376	-438.4	-441.68
1791	950.74	62442.8	1.555	0.686196	31.4158	-116.288	-430.4	-433.73
1792	951.29	62494.3	1.366	0.685984	31.3692	-116.242	-440.5	-443.78
1793	951.84	62553	1.356	0.685688	31.3159	-116.193	-440.4	-443.68
1794	952.39	62612.2	1.368	0.68537	31.2613	-116.082	-440.1	-443.39
1795	952.94	62670.9	1.399	0.685158	31.2071	-115.978	-438.2	-441.5
1796	953.49	62728.2	1.425	0.684852	31.1538	-115.888	-436.4	-439.72
1797	954.04	62784.6	1.325	0.684548	31.1011	-115.79	-442.1	-445.38
1798	954.59	62845.2	1.304	0.684336	31.0442	-115.678	-443.9	-447.18
1799	955.14	62906.9	1.376	0.684032	30.986	-115.539	-438.6	-441.91
1800	955.69	62965.3	1.363	0.68382	30.9307	-115.406	-437.5	-440.82
1801	956.24	63024.3	1.203	0.68353	30.8747	-115.275	-450.1	-453.35
1802	956.79	63091.2	1.305	0.683281	30.8111	-115.091	-442.7	-446
1803	957.34	63152.9	1.306	0.683069	30.7524	-114.903	-442.4	-445.7
1804	957.89	63214.5	1.302	0.682822	30.6939	-114.741	-443.6	-446.9
1805	958.44	63276.4	1.334	0.682609	30.6352	-114.582	-440.8	-444.12
1806	958.99	63336.8	1.307	0.682342	30.5779	-114.43	-442.9	-446.21
1807	959.54	63398.5	1.334	0.682129	30.5193	-114.274	-441.4	-444.72
1808	960.09	63458.9	1.364	0.681862	30.4619	-114.125	-440.1	-443.43
1809	960.64	63518.1	1.437	0.68165	30.4056	-114.006	-438	-441.34
1810	961.19	63574.2	1.587	0.681401	30.352	-113.931	-428.2	-431.6
1811	961.74	63625.1	1.598	0.681108	30.3033	-113.909	-427.8	-431.21
1812	962.29	63675.6	1.504	0.680896	30.2544	-113.888	-437.1	-440.45
1813	962.84	63729.3	1.582	0.680596	30.2019	-113.869	-426.7	-430.11
1814	963.39	63780.4	1.4	0.680384	30.1513	-113.828	-440.3	-443.63
1815	963.94	63838.1	1.483	0.680073	30.0936	-113.764	-434.3	-437.67
1816	964.49	63892.7	1.502	0.679773	30.0385	-113.704	-434.2	-437.57
1817	965.04	63946.5	1.58	0.679561	29.9838	-113.646	-429.7	-433.1
1818	965.59	63997.7	1.528	0.679257	29.9311	-113.625	-431.9	-435.28
1819	966.14	64050.7	1.404	0.679045	29.8765	-113.605	-438.3	-441.64
1820	966.69	64108.4	1.36	0.67874	29.8157	-113.489	-441.6	-444.92
1821	967.24	64168	1.39	0.678427	29.7528	-113.364	-437.4	-440.74
1822	967.79	64226.3	1.37	0.678215	29.6908	-113.232	-439.8	-443.13
1823	968.34	64285.5	1.31	0.677898	29.6277	-113.082	-443.1	-446.41
1824	968.89	64347.4	1.378	0.677686	29.5616	-112.914	-439.4	-442.73
1825	969.44	64406.3	1.408	0.67737	29.4985	-112.78	-436.6	-439.94
1826	969.99	64464	1.369	0.677071	29.4366	-112.649	-440.1	-443.42
1827	970.54	64523.4	1.337	0.676858	29.3727	-112.505	-441.9	-445.2
1828	971.09	64584.1	1.402	0.676559	29.307	-112.357	-437.6	-440.93
1829	971.64	64642.1	1.328	0.676346	29.2442	-112.215	-442.7	-446
1830	972.19	64703.3	1.378	0.676029	29.1776	-112.049	-437	-440.33
1831	972.74	64762.4	1.327	0.675711	29.1133	-111.885	-443.3	-446.59
1832	973.29	64823.7	1.329	0.675499	29.0464	-111.709	-441.3	-444.6
1833	973.84	64884.9	1.356	0.675172	28.9795	-111.533	-440.2	-443.51
1834	974.39	64945	1.377	0.674959	28.9138	-111.362	-440.6	-443.9
1835	974.94	65004.2	1.474	0.674633	28.849	-111.226	-433.5	-436.84
1836	975.49	65059.5	1.436	0.674302	28.7884	-111.102	-434.2	-437.54
1837	976.04	65116.3	1.313	0.674089	28.7258	-110.975	-446	-449.27
1838	976.59	65178.5	1.387	0.673764	28.6571	-110.817	-437.4	-440.72
1839	977.14	65237.3	1.34	0.673424	28.5918	-110.647	-441.5	-444.79
1840	977.69	65298.3	1.36	0.673212	28.524	-110.469	-439.3	-442.61
1841	978.24	65358.4	1.321	0.672879	28.4572	-110.289	-442.2	-445.49
1842	978.79	65420.2	1.296	0.672666	28.3883	-110.087	-443.9	-447.18
1843	979.34	65483.3	1.347	0.672323	28.3181	-109.881	-440.1	-443.4
1844	979.89	65544.1	1.293	0.671979	28.2506	-109.684	-444.8	-448.08
1845	980.44	65607.4	1.362	0.671767	28.1803	-109.467	-438.1	-441.42
1846	980.99	65667.5	1.34	0.671418	28.1135	-109.264	-441.4	-444.7
1847	981.54	65728.6	1.293	0.671081	28.0458	-109.068	-443.6	-446.89
1848	982.09	65792	1.278	0.670868	27.9757	-108.84	-445	-448.28
1849	982.64	65856.1	1.329	0.670537	27.9047	-108.597	-440.1	-443.41
1850	983.19	65917.9	1.304	0.670223	27.8368	-108.379	-443.2	-446.49
1851	983.74	65980.8	1.265	0.670011	27.7677	-108.145	-445	-448.28
1852	984.29	66045.7	1.278	0.669668	27.6965	-107.891	-444.4	-447.69
1853	984.84	66109.9	1.289	0.669455	27.6265	-107.636	-442.5	-445.8
1854	985.39	66173.6	1.246	0.669128	27.5574	-107.38	-446.4	-449.68
1855	985.94	66239.6	1.307	0.668788	27.4861	-107.106	-442.7	-446
1856	986.49	66302.5	1.322	0.668575	27.4187	-106.866	-442.2	-445.5
1857	987.04	66364.8	1.34	0.668243	27.3522	-106.636	-440.5	-443.81
1858	987.59	66426.2	1.335	0.667895	27.2869	-106.42	-441.8	-445.1
1859	988.14	66487.9	1.459	0.667682	27.2215	-106.229	-434.6	-437.94
1860	988.69	66544.3	1.277	0.667342	27.1618	-106.069	-445.9	-449.17
1861	989.24	66608.9	1.351	0.666992	27.0934	-105.818	-439.6	-442.91
1862	989.79	66669.9	1.38	0.666779	27.0289	-105.588	-438.3	-441.61
1863	990.34	66729.7	1.314	0.666434	26.9661	-105.386	-442.9	-446.19
1864	990.89	66792.5	1.316	0.666221	26.9003	-105.153	-443	-446.28
1865	991.44	66855.2	1.362	0.66588	26.8347	-104.912	-438.6	-441.91
1866	991.99	66915.8	1.329	0.665539	26.7718	-104.694	-441.7	-444.99
1867	992.54	66978	1.267	0.665326	26.7074	-104.454	-445.4	-448.66
1868	993.09	67043.3	1.333	0.665004	26.6401	-104.179	-440.6	-443.89
1869	993.64	67105.3	1.293	0.664657	26.5767	-103.932	-444.1	-447.36
1870	994.19	67169.3	1.29	0.664445	26.5117	-103.673	-443.3	-446.57
1871	994.74	67233.5	1.282	0.664125	26.4468	-103.398	-444.4	-447.66
1872	995.29	67298.1	1.335	0.663912	26.3822	-103.127	-440.9	-444.17
1873	995.84	67360.2	1.328	0.663582	26.3205	-102.871	-441.2	-444.47
1874	996.39	67422.6	1.291	0.663252	26.2591	-102.62	-444.2	-447.44
1875	996.94	67486.8	1.363	0.66304	26.1963	-102.362	-440.5	-443.76
1876	997.49	67547.7	1.434	0.662686	26.1371	-102.118	-434.6	-437.89
1877	998.04	67605.6	1.339	0.662326	26.0815	-101.925	-442.5	-445.74
1878	998.59	67667.6	1.307	0.662113	26.0219	-101.704	-442.6	-445.84
1879	999.14	67731.1	1.309	0.661783	25.9612	-101.435	-443.8	-447.03
1880	999.69	67794.7	1.517	0.66157	25.9012	-101.211	-430.5	-433.8
1881	1000.24	67849.4	1.374	0.661259	25.8496	-101.034	-441.1	-444.34
1882	1000.79	67910	1.376	0.660951	25.7929	-100.816	-439.5	-442.74
1883	1001.34	67970.4	1.396	0.660738	25.7365	-100.597	-437.5	-440.75
1884	1001.89	68030.1	1.325	0.660423	25.6812	-100.38	-442.3	-445.52
1885	1002.44	68092.9	1.251	0.660211	25.6234	-100.111	-445.8	-448.99
1886	1002.99	68159.5	1.261	0.659883	25.5625	-99.8049	-445.1	-448.29
1887	1003.54	68225.6	1.28	0.659532	25.5031	-99.4842	-443.9	-447.1
1888	1004.09	68290.7	1.478	0.659319	25.4453	-99.2139	-434.7	-437.95
1889	1004.64	68347.1	1.454	0.65897	25.3958	-99.0035	-436.2	-439.44
1890	1005.19	68404.5	1.471	0.658608	25.346	-98.8301	-435.5	-438.74
1891	1005.74	68461.3	1.483	0.658395	25.2968	-98.6622	-433.5	-436.75
1892	1006.29	68517.7	1.458	0.658035	25.2483	-98.5015	-436.9	-440.13
1893	1006.84	68575	1.462	0.657687	25.199	-98.3311	-434.6	-437.84
1894	1007.39	68632.2	1.385	0.657474	25.1499	-98.1521	-439.7	-442.91
1895	1007.94	68692.6	1.404	0.657123	25.0984	-97.9414	-436.9	-440.13
1896	1008.49	68752.2	1.301	0.65691	25.0477	-97.7222	-444.7	-447.88
1897	1009.04	68816.6	1.314	0.656588	24.9937	-97.4267	-441.9	-445.1
1898	1009.59	68880.3	1.323	0.656258	24.9408	-97.137	-441.7	-444.9
1899	1010.14	68943.6	1.256	0.656045	24.8889	-96.8522	-446.5	-449.67
1900	1010.69	69010.4	1.3	0.65572	24.8354	-96.5176	-441.3	-444.5
1901	1011.24	69074.9	1.255	0.655507	24.7844	-96.1918	-446.3	-449.47
1902	1011.79	69141.8	1.337	0.655212	24.7327	-95.8555	-440.7	-443.91
1903	1012.34	69204.6	1.305	0.654909	24.6855	-95.5652	-443.6	-446.79
1904	1012.89	69268.9	1.314	0.654697	24.6378	-95.2691	-442.2	-445.4
1905	1013.44	69332.9	1.347	0.654382	24.5915	-94.9691	-441.6	-444.81
1906	1013.99	69395.3	1.503	0.654169	24.5473	-94.7254	-431.7	-434.96
1907	1014.54	69451.2	1.396	0.653865	24.5081	-94.5233	-439.2	-442.42
1908	1015.09	69511.5	1.36	0.653653	24.4668	-94.2854	-441.1	-444.31
1909	1015.64	69573.4	1.41	0.653353	24.4247	-94.0453	-438.3	-441.53
1910	1016.19	69633.1	1.574	0.653078	24.3848	-93.8205	-429.6	-432.88
1911	1016.74	69686.6	1.512	0.652865	24.3497	-93.6628	-433.7	-436.96
1912	1017.29	69742.3	1.538	0.652584	24.3135	-93.5197	-431.8	-435.07
1913	1017.84	69797.1	1.457	0.652371	24.2782	-93.3627	-435.9	-439.15
1914	1018.39	69854.9	1.444	0.652103	24.241	-93.1917	-437.6	-440.84
1915	1018.94	69913.4	1.489	0.65189	24.2039	-92.9929	-433.2	-436.46
1916	1019.49	69970	1.504	0.651649	24.1683	-92.809	-434.4	-437.65
1917	1020.04	70026.1	1.523	0.651436	24.1336	-92.6431	-432.3	-435.56
1918	1020.59	70081.6	1.497	0.6512	24.0996	-92.4828	-434.6	-437.85
1919	1021.14	70138	1.614	0.650987	24.0653	-92.3226	-429	-432.28
1920	1021.69	70190.4	1.635	0.650767	24.0339	-92.2139	-428.2	-431.48
1921	1022.24	70242.1	1.533	0.650554	24.003	-92.1182	-433.6	-436.85
1922	1022.79	70297.2	1.666	0.650326	23.9701	-92.0043	-425.9	-429.19
1923	1023.34	70348	1.645	0.650113	23.9399	-91.8975	-428.4	-431.68
1924	1023.89	70399.4	1.651	0.649858	23.9094	-91.8138	-427.9	-431.18
1925	1024.44	70450.6	1.706	0.649645	23.8791	-91.732	-426.7	-429.98
1926	1024.99	70500.2	1.827	0.649361	23.8497	-91.7056	-419.4	-422.72
1927	1025.54	70546.6	1.76	0.649148	23.8222	-91.681	-424.5	-427.79
1928	1026.09	70594.8	1.804	0.648884	23.7932	-91.664	-421.9	-425.21
1929	1026.64	70641.8	1.811	0.648671	23.7649	-91.6481	-422	-425.3
1930	1027.19	70688.6	1.895	0.648408	23.7362	-91.6584	-418.5	-421.82
1931	1027.74	70733.3	1.839	0.648195	23.7087	-91.6736	-421.2	-424.5
1932	1028.29	70779.5	1.81	0.647935	23.6798	-91.6796	-421.4	-424.7
1933	1028.84	70826.4	1.787	0.647722	23.65	-91.6802	-424.1	-427.38
1934	1029.39	70873.9	1.735	0.647431	23.6195	-91.6561	-420.7	-424
1935	1029.94	70922.9	1.564	0.647218	23.5877	-91.6061	-434.7	-437.91
1936	1030.49	70977.2	1.579	0.646933	23.5522	-91.5187	-432	-435.22
1937	1031.04	71031.1	1.765	0.64672	23.5168	-91.4005	-419.7	-422.99
1938	1031.59	71079.2	1.634	0.646456	23.4852	-91.3182	-430.9	-434.12
1939	1032.14	71131.3	1.667	0.646243	23.4512	-91.2457	-426.8	-430.04
1940	1032.69	71182.4	1.71	0.645959	23.4177	-91.1767	-425.6	-428.84
1941	1033.24	71232.2	1.737	0.645746	23.3849	-91.1105	-424.4	-427.64
1942	1033.79	71281.2	1.714	0.645457	23.3525	-91.0486	-424.6	-427.84
1943	1034.34	71330.9	1.598	0.645169	23.3196	-90.9875	-430.7	-433.9
1944	1034.89	71384.3	1.561	0.644957	23.284	-90.8801	-431.6	-434.78
1945	1035.44	71438.9	1.618	0.644657	23.2475	-90.746	-429.1	-432.29
1946	1035.99	71491.6	1.617	0.644444	23.2125	-90.6263	-429.7	-432.88
1947	1036.54	71544.4	1.746	0.644132	23.1775	-90.509	-423.5	-426.71
1948	1037.09	71593.3	1.636	0.643919	23.1453	-90.4355	-428.7	-431.87
1949	1037.64	71645.5	1.616	0.64361	23.1108	-90.3618	-429.5	-432.66
1950	1038.19	71698.4	1.626	0.643397	23.0757	-90.251	-428.4	-431.56
1951	1038.74	71751	1.597	0.643075	23.0409	-90.1373	-430.5	-433.64
1952	1039.29	71804.5	1.608	0.64273	23.0055	-90.0096	-429.9	-433.03
1953	1039.84	71857.8	1.619	0.642517	22.9703	-89.883	-428.1	-431.24
1954	1040.39	71910.6	1.581	0.642183	22.9356	-89.7587	-431.1	-434.21
1955	1040.94	71964.8	1.56	0.641845	22.9002	-89.6243	-432.3	-435.4
1956	1041.49	72019.7	1.551	0.641633	22.8644	-89.4692	-430.2	-433.31
1957	1042.04	72074.9	1.478	0.641309	22.8286	-89.3005	-437	-440.06
1958	1042.59	72133	1.557	0.641096	22.7914	-89.1075	-430.9	-433.99
1959	1043.14	72188.1	1.504	0.640779	22.7565	-88.9272	-434.2	-437.26
1960	1043.69	72245.1	1.515	0.640472	22.7206	-88.7418	-432.5	-435.56
1961	1044.24	72301.9	1.408	0.640259	22.6857	-88.5316	-438.2	-441.22
1962	1044.79	72362.9	1.36	0.639957	22.6484	-88.2902	-442.2	-445.19
1963	1045.34	72426.1	1.428	0.639745	22.6107	-87.9918	-436.2	-439.22
1964	1045.89	72486.3	1.419	0.63946	22.5758	-87.7225	-437.7	-440.7
1965	1046.44	72546.9	1.401	0.639247	22.5414	-87.4611	-438.8	-441.79
1966	1046.99	72608.3	1.424	0.638963	22.5079	-87.1871	-438	-440.98
1967	1047.54	72668.7	1.471	0.63875	22.4755	-86.9265	-434.8	-437.79
1968	1048.09	72727.3	1.491	0.638464	22.4452	-86.695	-434.5	-437.49
1969	1048.64	72785	1.49	0.638251	22.4161	-86.4758	-434.7	-437.68
1970	1049.19	72842.9	1.523	0.637966	22.3875	-86.2625	-433.4	-436.38
1971	1049.74	72899.5	1.537	0.637691	22.3605	-86.0719	-431.9	-434.88
1972	1050.29	72955.6	1.531	0.637479	22.3341	-85.8867	-434.9	-437.86
1973	1050.84	73012	1.594	0.637201	22.3084	-85.7095	-428.4	-431.38
1974	1051.39	73066.1	1.619	0.636988	22.284	-85.5505	-430.3	-433.27
1975	1051.94	73119.4	1.642	0.636724	22.2606	-85.4197	-428	-430.97
1976	1052.49	73172	1.628	0.636511	22.2378	-85.2906	-427.6	-430.57
1977	1053.04	73225.1	1.559	0.636242	22.2151	-85.16	-434.3	-437.23
1978	1053.59	73280.5	1.658	0.636029	22.1917	-85.0202	-425.9	-428.87
1979	1054.14	73332.7	1.586	0.635802	22.17	-84.8861	-431.6	-434.53
1980	1054.69	73387.3	1.655	0.63559	22.1478	-84.748	-427.7	-430.64
1981	1055.24	73439.5	1.547	0.635357	22.1267	-84.6166	-433.4	-436.3
1982	1055.79	73495.5	1.762	0.635145	22.1047	-84.4944	-422.1	-425.05
1983	1056.34	73544.6	1.619	0.634917	22.0855	-84.3908	-430.5	-433.4
1984	1056.89	73598.1	1.683	0.634705	22.065	-84.2702	-426.4	-429.32
1985	1057.44	73649.6	1.7	0.634485	22.0454	-84.1534	-426.4	-429.31
1986	1057.99	73700.6	1.699	0.634272	22.0265	-84.0656	-425.7	-428.61
1987	1058.54	73751.6	1.665	0.634043	22.0075	-83.9776	-428.8	-431.68
1988	1059.09	73803.7	1.711	0.63383	21.9886	-83.8778	-425.3	-428.2
[truncated: 3,938 more rows]
