# Supplementary material for: 1-D-ice flow modelling at EPICA Dome C and Dome Fuji, East Antarctica
Source: Copernicus journal article supplement (doi:10.5194/cp-3-243-2007), 2007-06-01
Supplement: Supplementary file 2 [file sp2.xls]

## Sheet: agescale
F. Parrenin, January, 25, 2007.
The DFGT-2006 agescale for the Dome Fuji ice core.
column 1:	Depth of the top of the interval (in m below surface).
column 2:	Depth of the top of the interval, in m ice equivalent (the firn being virtually compressed into pure ice).
column 3:	Age of the top of the interval (yr b1950, years before 1950 AD).
column 4:	Surface temperature (Kelvin).
column 5:	Surface accumulation rate of the interval, in cm of ice-equivalent per year (cm-ie/yr).
column 6:	Total thinning of ice (or thinning function).
column 7:	The variations in bedrock elevation at EDC (m).
column 8:	The variations in surface elevation at EDC (m).
logdepthtop	ie-depth	agetop-b1950	temp	acc	thin-mid	Delta-bed-elevation (m)	Delta-surf-elevation (m)
0	0	-45	217.2	3.276	0.999818	0	0
1	0.38	-33.35	217.2	3.276	0.99968	0.0141243	-0.0219254
2	0.76	-21.69	217.2	3.276	0.999541	0.0282608	-0.0438696
3	1.15	-10.02	217.2	3.276	0.999402	0.0424094	-0.0658326
4	1.53	1.81	217.2	2.88	0.999261	0.056752	-0.0880967
5	1.93	15.53	215.6	2.77	0.999118	0.073386	-0.113918
6	2.33	30.14	214.3	2.77	0.998971	0.091099	-0.141414
7	2.75	45.14	214.3	2.693	0.998807	0.109285	-0.169644
8	3.17	61.02	214.3	2.572	0.998629	0.128725	-0.175595
9	3.61	78.15	214.6	2.572	0.998445	0.150025	-0.139725
10	4.07	95.81	214.7	2.603	0.998255	0.171985	-0.102746
11	4.54	113.8	214.7	2.635	0.99806	0.194355	-0.0650753
12	5.02	132.11	214.7	2.635	0.997858	0.217123	-0.0267347
13	5.51	150.95	214.6	2.613	0.997647	0.24055	0.0127156
14	6.02	170.48	214.6	2.608	0.99743	0.265643	0.0630232
15	6.54	190.57	214.6	2.565	0.997207	0.291673	0.117306
16	7.08	211.5	214.2	2.472	0.996978	0.318791	0.173859
17	7.63	233.73	213.6	2.468	0.996744	0.347594	0.233925
18	8.19	256.45	213.6	2.421	0.996504	0.377114	0.295486
19	8.76	280.08	213.9	2.421	0.99626	0.409071	0.362132
20	9.34	304.12	214.5	2.591	0.996012	0.441583	0.429934
21	9.93	326.96	214.5	2.598	0.995759	0.472471	0.494351
22	10.52	350.02	214.9	2.759	0.995518	0.503658	0.559389
23	11.12	371.94	215.7	2.807	0.995284	0.534105	0.578278
24	11.73	393.67	215.7	2.773	0.995048	0.564523	0.584491
25	12.34	415.83	215.3	2.738	0.994811	0.595543	0.590827
26	12.96	438.44	214.6	2.724	0.994572	0.627192	0.597291
27	13.58	461.33	214.6	2.687	0.994335	0.659456	0.600697
28	14.2	484.68	215.4	2.716	0.994098	0.692962	0.595792
29	14.83	507.93	215.9	2.923	0.993858	0.726325	0.590909
30	15.46	529.68	216	2.923	0.993618	0.757535	0.586341
31	16.1	551.56	215.5	2.82	0.993372	0.788931	0.581745
32	16.74	574.38	215.5	2.802	0.993124	0.822384	0.58865
33	17.38	597.49	215.1	2.717	0.992874	0.856388	0.597746
34	18.03	621.46	214.8	2.679	0.992622	0.891659	0.60718
35	18.68	645.92	214.8	2.587	0.992361	0.92765	0.616807
36	19.33	671.4	214.1	2.538	0.992089	0.965933	0.656989
37	19.99	697.52	214.1	2.527	0.991815	1.00563	0.715293
38	20.65	723.91	214.3	2.523	0.99154	1.04573	0.774201
39	21.31	750.49	214.5	2.585	0.991268	1.08612	0.833532
40	21.98	776.58	214.6	2.598	0.990999	1.12694	0.875491
41	22.66	802.69	214.7	2.618	0.990727	1.16804	0.914076
42	23.33	828.76	214.7	2.62	0.990455	1.20907	0.952602
43	24.01	854.95	214.5	2.573	0.990183	1.25029	0.991306
44	24.69	881.77	214.4	2.585	0.98991	1.29387	1.02484
45	25.38	908.62	214.5	2.66	0.989636	1.33751	1.0584
46	26.07	934.85	215.3	2.671	0.98936	1.38014	1.09119
47	26.77	961.12	215.3	2.709	0.989085	1.42314	1.12317
48	27.46	987.16	214.5	2.653	0.988809	1.46678	1.15206
49	28.17	1013.9	214.3	2.546	0.988531	1.5116	1.18172
50	28.87	1041.91	214.2	2.524	0.988253	1.55855	1.2128
51	29.58	1070.32	214.1	2.507	0.987978	1.60692	1.23658
52	30.29	1099.08	214.3	2.741	0.987702	1.65654	1.25394
53	31.01	1125.52	216.2	2.813	0.987424	1.70215	1.26991
54	31.73	1151.42	216.2	2.865	0.987155	1.74684	1.28554
55	32.45	1176.99	215.3	2.873	0.986891	1.79186	1.26561
56	33.18	1202.62	215.2	2.765	0.986625	1.83713	1.23986
57	33.91	1229.39	215.3	2.753	0.986359	1.88442	1.21296
58	34.64	1256.42	215.3	2.733	0.986082	1.93222	1.18757
59	35.38	1283.79	214.9	2.704	0.985801	1.98168	1.19414
60	36.12	1311.59	214.5	2.615	0.985518	2.03191	1.20082
61	36.86	1340.48	214.7	2.643	0.985236	2.08411	1.20776
62	37.61	1369.22	214.9	2.671	0.984957	2.13667	1.20562
63	38.36	1397.8	215.1	2.768	0.984678	2.18958	1.1943
64	39.12	1425.52	215.6	2.802	0.984397	2.24089	1.18333
65	39.88	1453.03	215.4	2.73	0.984112	2.29181	1.17243
66	40.64	1481.42	214.8	2.703	0.983823	2.34556	1.17629
67	41.41	1510.23	214.7	2.605	0.983533	2.40019	1.18136
68	42.18	1540.27	214.3	2.585	0.983241	2.45715	1.18664
69	42.95	1570.69	214.4	2.567	0.982947	2.51561	1.19478
70	43.73	1601.48	214.9	2.668	0.982651	2.57552	1.2057
71	44.51	1631.24	215	2.707	0.982354	2.63342	1.21624
72	45.29	1660.71	215.5	2.818	0.982081	2.69098	1.21031
73	46.08	1689.16	215.6	2.904	0.981812	2.74744	1.13878
74	46.87	1716.9	216.5	3.022	0.981541	2.80249	1.06903
75	47.66	1743.68	216.5	3.006	0.981268	2.85563	1.0017
76	48.46	1770.73	216.1	2.995	0.980993	2.90975	0.937371
77	49.26	1798.01	215.9	2.815	0.980717	2.96465	0.875175
78	50.07	1827.17	214.7	2.753	0.98044	3.02334	0.808692
79	50.88	1857.11	214.7	2.661	0.980147	3.08367	0.744462
80	51.69	1888.23	215	2.674	0.979848	3.14749	0.732973
81	52.5	1919.34	215	2.689	0.979548	3.21129	0.721488
82	53.32	1950.42	214.6	2.625	0.979245	3.27503	0.710014
83	54.14	1982.4	214.6	2.623	0.97894	3.34195	0.704276
84	54.97	2014.55	214.7	2.645	0.978634	3.40945	0.699529
85	55.8	2046.57	215	2.759	0.978333	3.47667	0.6948
86	56.63	2077.41	215.8	2.797	0.978039	3.54243	0.661006
87	57.47	2107.96	215.5	2.751	0.977745	3.60795	0.616635
88	58.31	2139.15	214.5	2.699	0.97745	3.67484	0.571334
89	59.15	2171.09	214.9	2.648	0.977159	3.74395	0.51659
90	59.99	2203.78	216	2.932	0.976867	3.8153	0.452137
91	60.84	2233.42	215.9	2.927	0.976574	3.87999	0.393699
92	61.7	2263.25	215.8	2.883	0.97628	3.94541	0.335425
93	62.55	2293.65	215.4	2.75	0.975984	4.01289	0.277475
94	63.41	2325.67	214.6	2.671	0.975688	4.08396	0.216437
95	64.27	2358.76	214.6	2.611	0.975376	4.15759	0.159697
96	65.14	2392.75	214.6	2.597	0.975059	4.23459	0.152195
97	66.01	2427.07	214.4	2.586	0.97474	4.31234	0.144621
98	66.88	2461.68	214.3	2.572	0.974428	4.39109	0.131906
99	67.76	2496.62	215.1	2.71	0.974117	4.47202	0.0976424
100	68.63	2529.91	215.4	2.755	0.973805	4.54914	0.064997
101	69.52	2562.79	215.2	2.745	0.973499	4.62566	0.0273404
102	70.4	2595.91	215.1	2.711	0.973194	4.7039	-0.0281535
103	71.29	2629.59	214.9	2.691	0.972887	4.78346	-0.0845858
104	72.18	2663.65	214.9	2.669	0.972577	4.86431	-0.139001
105	73.08	2698.11	214.8	2.654	0.972265	4.94727	-0.18617
106	73.98	2732.92	214.8	2.718	0.971952	5.03107	-0.233817
107	74.88	2767.03	215.8	2.846	0.971658	5.11366	-0.303186
108	75.78	2799.73	215.9	2.89	0.971365	5.19367	-0.409592
109	76.69	2832.06	215.6	2.891	0.97107	5.27278	-0.514794
110	77.6	2864.49	215.6	2.875	0.970782	5.3524	-0.627177
111	78.51	2897.23	216.1	2.944	0.970493	5.43344	-0.757365
112	79.43	2929.32	216	2.94	0.970204	5.51288	-0.884968
113	80.35	2961.55	215.7	2.839	0.969905	5.59287	-1.00584
114	81.27	2995	214.8	2.742	0.969603	5.67672	-1.10163
115	82.19	3029.74	215.2	2.749	0.9693	5.7638	-1.20112
116	83.12	3064.47	215.8	2.876	0.969001	5.85119	-1.30413
117	84.05	3097.75	215.8	2.828	0.968702	5.93579	-1.41189
118	84.98	3131.69	215	2.746	0.968402	6.02206	-1.5218
119	85.91	3166.73	214.5	2.613	0.96808	6.11165	-1.61014
120	86.84	3203.63	213.9	2.502	0.967755	6.20706	-1.65061
121	87.78	3242.27	214.9	2.645	0.967434	6.30698	-1.69298
122	88.71	3278.92	215.3	2.739	0.967128	6.40289	-1.77197
123	89.65	3314.38	215.3	2.777	0.966821	6.49626	-1.86836
124	90.6	3349.43	215.6	2.861	0.96652	6.58855	-1.96364
125	91.54	3383.55	215.8	2.883	0.96623	6.67938	-2.10046
126	92.48	3417.47	215.8	2.893	0.965939	6.76987	-2.24503
127	93.43	3451.35	215.3	2.765	0.965639	6.86025	-2.38942
128	94.38	3486.87	215	2.696	0.965332	6.95613	-2.49209
129	95.33	3523.37	214.6	2.674	0.965023	7.05479	-2.59185
130	96.28	3560.25	215.8	2.868	0.964725	7.15467	-2.69958
131	97.23	3594.7	215.8	2.823	0.96443	7.24906	-2.83913
132	98.19	3629.77	215	2.829	0.964136	7.34515	-2.9812
133	99.15	3664.83	215.9	2.894	0.963849	7.44149	-3.13265
134	100.1	3699.17	216.1	2.932	0.963564	7.53654	-3.3047
135	101.06	3733.12	215.8	2.96	0.963278	7.63051	-3.47479
136	102.02	3766.82	216.3	2.999	0.962997	7.72405	-3.64886
137	102.99	3800.14	216.2	2.92	0.962715	7.81703	-3.83054
138	103.95	3834.41	215.2	2.896	0.962433	7.91265	-4.01739
139	104.91	3869.03	215.9	2.881	0.962149	8.00956	-4.20232
140	105.88	3903.89	216.1	2.908	0.961864	8.1076	-4.38285
141	106.85	3938.47	215.4	2.963	0.96158	8.20485	-4.56193
142	107.82	3972.46	216.7	3.019	0.961313	8.30073	-4.77
143	108.79	4005.87	217.1	3.152	0.961044	8.39522	-5.00435
144	109.76	4037.92	216	3.166	0.960776	8.48586	-5.22916
145	110.73	4069.88	217.2	3.182	0.960514	8.57632	-5.4647
146	111.7	4101.72	217.2	3.114	0.960252	8.66652	-5.71234
147	112.68	4134.29	215.7	3.111	0.95999	8.75879	-5.96566
148	113.65	4166.94	216.9	3.118	0.959722	8.85133	-6.21131
149	114.63	4199.56	216.8	3.036	0.959453	8.94389	-6.44234
150	115.6	4233.1	215.5	3.003	0.959185	9.03905	-6.67989
151	116.58	4267.06	216.2	2.972	0.958912	9.13552	-6.9147
152	117.56	4301.4	216.3	3.014	0.958639	9.23329	-7.14166
153	118.54	4335.31	216.1	3.05	0.958366	9.32984	-7.36578
154	119.52	4368.83	216.7	3.097	0.958101	9.42539	-7.5996
155	120.5	4401.9	216.7	3.1	0.957836	9.51981	-7.84751
156	121.48	4434.96	216.3	3.054	0.95757	9.6142	-8.09534
157	122.46	4468.54	216.1	2.988	0.957297	9.7102	-8.33422
158	123.45	4502.91	216	2.936	0.957024	9.80863	-8.55923
159	124.43	4537.92	215.8	2.961	0.95675	9.9089	-8.78843
160	125.42	4572.68	216.3	2.991	0.95648	10.0086	-9.02381
161	126.4	4607.11	216.4	3.043	0.956211	10.1076	-9.26444
162	127.39	4640.99	216.3	3.023	0.955941	10.205	-9.50123
163	128.37	4675.15	216.2	3	0.955671	10.3034	-9.7386
164	129.36	4709.59	216	2.948	0.9554	10.4028	-9.97695
165	130.35	4744.68	215.8	3.022	0.955133	10.504	-10.2198
166	131.34	4778.94	216.9	3.089	0.954875	10.6029	-10.4901
167	132.33	4812.49	217	3.214	0.954616	10.6999	-10.7688
168	133.32	4844.77	216.7	3.118	0.954356	10.7931	-11.037
169	134.31	4878.09	216.2	3.061	0.954093	10.8894	-11.3002
170	135.3	4912.05	216.2	3.005	0.953829	10.9875	-11.5624
171	136.3	4946.68	216.2	2.981	0.953563	11.0876	-11.8297
172	137.29	4981.62	215.9	2.956	0.953292	11.1887	-12.0768
173	138.28	5016.89	215.9	2.921	0.953021	11.2909	-12.3192
174	139.28	5052.62	215.9	2.948	0.95275	11.3944	-12.5646
175	140.27	5088.07	216.2	2.957	0.95248	11.4974	-12.8121
176	141.27	5123.45	216	2.953	0.95221	11.6003	-13.0594
177	142.27	5158.91	215.7	2.876	0.951937	11.7034	-13.3057
178	143.26	5195.35	215.8	2.898	0.951664	11.8098	-13.5462
179	144.26	5231.57	215.9	2.922	0.95139	11.9155	-13.7852
180	145.26	5267.51	216	2.953	0.95112	12.0205	-14.0275
181	146.26	5303.09	216.1	2.938	0.950851	12.1248	-14.2768
182	147.26	5338.88	215.7	2.857	0.950579	12.2297	-14.5277
183	148.26	5375.7	215.2	2.788	0.950298	12.338	-14.7596
184	149.26	5413.45	215.3	2.761	0.950017	12.4493	-14.9766
185	150.26	5451.58	215.2	2.754	0.949736	12.5616	-15.1958
186	151.26	5489.82	215.2	2.78	0.949456	12.6751	-15.415
187	152.26	5527.7	215.6	2.799	0.949175	12.7876	-15.6321
188	153.26	5565.33	215.4	2.799	0.948896	12.8996	-15.8484
189	154.26	5602.98	215.1	2.735	0.948617	13.0123	-16.0665
190	155.26	5641.53	215.2	2.759	0.948339	13.1276	-16.2899
191	156.26	5679.75	215.4	2.786	0.948065	13.2425	-16.5206
192	157.26	5717.61	215.5	2.808	0.94779	13.3566	-16.7542
193	158.26	5755.19	216.3	2.982	0.947522	13.4699	-16.9862
194	159.26	5790.58	215.7	2.86	0.94726	13.5771	-17.2447
195	160.26	5827.49	215	2.827	0.946997	13.6888	-17.5142
196	161.26	5864.85	216.3	2.958	0.94673	13.8021	-17.7819
197	162.26	5900.56	215.6	2.78	0.946463	13.9107	-18.0244
198	163.26	5938.56	214.5	2.688	0.946196	14.0263	-18.2824
199	164.26	5977.88	214.9	2.7	0.945923	14.1463	-18.5335
200	165.26	6017.04	215.8	2.845	0.94565	14.2662	-18.7721
201	166.26	6054.21	215.6	2.82	0.945383	14.3799	-18.9986
202	167.26	6091.71	215.2	2.842	0.945121	14.4953	-19.2658
203	168.26	6128.95	216	2.861	0.944859	14.6099	-19.532
204	169.26	6165.94	215.7	2.88	0.944604	14.7238	-19.8045
205	170.26	6202.7	215.2	2.896	0.944349	14.8373	-20.0946
206	171.26	6239.26	217	3.028	0.944096	14.9501	-20.3832
207	172.26	6274.25	216.5	3.116	0.943853	15.0582	-20.6847
208	173.26	6308.25	215.8	2.938	0.94361	15.1631	-20.9979
209	174.26	6344.32	216.5	2.983	0.943365	15.2745	-21.3301
210	175.26	6379.86	215.9	2.946	0.943114	15.3842	-21.6329
211	176.26	6415.85	215.3	2.819	0.942864	15.4953	-21.9288
212	177.26	6453.47	216.1	2.928	0.94261	15.6115	-22.2381
213	178.26	6489.7	215.5	2.796	0.942354	15.7236	-22.5102
214	179.26	6527.65	214.7	2.729	0.942097	15.841	-22.7941
215	180.26	6566.55	215.5	2.784	0.941834	15.9615	-23.0749
216	181.26	6604.68	215	2.673	0.94157	16.0801	-23.3267
217	182.26	6644.42	214.4	2.716	0.94131	16.2036	-23.5891
218	183.26	6683.53	216.1	2.82	0.941057	16.3256	-23.8786
219	184.26	6721.21	215.9	2.928	0.940804	16.4432	-24.1686
220	185.26	6757.51	215.5	2.794	0.940546	16.5566	-24.4459
221	186.26	6795.57	214.7	2.671	0.940286	16.6759	-24.706
222	187.26	6835.39	214.7	2.642	0.940026	16.8008	-24.9781
223	188.26	6875.65	214.8	2.645	0.93976	16.9274	-25.2391
224	189.26	6915.89	214.7	2.631	0.939494	17.0544	-25.4866
225	190.26	6956.35	214.9	2.677	0.93923	17.1821	-25.7356
226	191.26	6996.12	215.1	2.638	0.938966	17.3086	-25.985
227	192.26	7036.49	214	2.556	0.938702	17.4369	-26.2381
228	193.26	7078.17	214.2	2.516	0.938432	17.57	-26.4829
229	194.26	7120.53	214.4	2.584	0.938162	17.7058	-26.7184
230	195.26	7161.78	215.6	2.808	0.937912	17.8382	-26.9659
231	196.26	7199.75	215.6	2.833	0.937669	17.9606	-27.279
232	197.26	7237.38	215.5	2.881	0.937426	18.0819	-27.5893
233	198.26	7274.41	216.1	2.898	0.937189	18.2014	-27.9053
234	199.26	7311.23	215.4	2.79	0.936951	18.3203	-28.2292
235	200.26	7349.48	214.6	2.755	0.936714	18.4437	-28.5658
236	201.26	7388.23	216.5	2.881	0.936479	18.5689	-28.9112
237	202.26	7425.3	216	2.956	0.936243	18.6886	-29.2425
238	203.26	7461.42	215.4	2.796	0.936001	18.8053	-29.5586
239	204.26	7499.63	214.6	2.658	0.935757	18.929	-29.8606
240	205.26	7539.83	214.9	2.688	0.935512	19.059	-30.1784
241	206.26	7579.6	215.2	2.692	0.935265	19.188	-30.4812
242	207.26	7619.32	214.6	2.645	0.935018	19.317	-30.7764
243	208.26	7659.76	214.8	2.664	0.934775	19.4484	-31.0802
244	209.26	7699.92	215.1	2.77	0.934535	19.5794	-31.405
245	210.26	7738.55	215.8	2.841	0.934296	19.7053	-31.7175
246	211.26	7776.22	215.7	2.878	0.934069	19.8281	-32.0532
247	212.26	7813.43	215.7	2.852	0.933841	19.9495	-32.4085
248	213.26	7850.97	215	2.763	0.933614	20.072	-32.767
249	214.26	7889.74	215.7	2.888	0.933388	20.1984	-33.1397
250	215.26	7926.83	216.5	2.967	0.933162	20.3192	-33.4966
251	216.26	7962.95	215.7	2.902	0.932936	20.4369	-33.8448
252	217.26	7999.88	215.4	2.797	0.932711	20.557	-34.2034
253	218.26	8038.21	215.1	2.8	0.932486	20.6817	-34.5756
254	219.26	8076.51	215.7	2.805	0.932257	20.8063	-34.9358
255	220.26	8114.75	215.2	2.776	0.932028	20.9306	-35.2863
256	221.26	8153.41	214.7	2.665	0.931797	21.0563	-35.6406
257	222.26	8193.68	215.3	2.726	0.931563	21.1873	-35.9813
258	223.26	8233.05	215.1	2.723	0.931328	21.3154	-36.3132
259	224.26	8272.49	214.9	2.693	0.931097	21.4438	-36.6498
260	225.26	8312.37	215.1	2.726	0.930866	21.5737	-36.9954
261	226.26	8351.79	215.5	2.825	0.930638	21.7022	-37.3371
262	227.26	8389.82	215.8	2.766	0.930413	21.8261	-37.6906
263	228.26	8428.67	214.5	2.693	0.930188	21.9528	-38.054
264	229.26	8468.6	214.8	2.646	0.929959	22.0829	-38.4187
265	230.26	8509.24	215.1	2.736	0.929729	22.2154	-38.7723
266	231.26	8548.55	215.4	2.791	0.929505	22.3436	-39.1144
267	232.26	8587.1	215.4	2.798	0.929287	22.4692	-39.4944
268	233.26	8625.57	215.4	2.848	0.92907	22.5946	-39.8826
269	234.26	8663.36	216.6	3.057	0.928867	22.7175	-40.2854
270	235.26	8698.58	216.8	3.148	0.928668	22.8315	-40.7314
271	236.26	8732.78	216.9	3.088	0.928469	22.9423	-41.1646
272	237.26	8767.66	215.7	2.95	0.928259	23.0549	-41.5843
273	238.26	8804.18	215.3	2.77	0.928049	23.1723	-41.9835
274	239.26	8843.08	215.1	2.782	0.927837	23.2973	-42.4088
275	240.26	8881.81	215.7	2.82	0.927623	23.4214	-42.8199
276	241.26	8920.04	215.7	2.87	0.92741	23.5436	-43.2203
277	242.26	8957.62	215.7	2.91	0.927203	23.6638	-43.6172
278	243.26	8994.67	216.6	2.988	0.926999	23.7816	-44.0529
279	244.26	9030.78	215.9	2.95	0.926795	23.8964	-44.4774
280	245.26	9067.36	215.3	2.819	0.926586	24.0124	-44.8988
281	246.26	9105.64	215.8	2.885	0.926378	24.1333	-45.322
282	247.26	9143.07	215.5	2.819	0.926168	24.2515	-45.7357
283	248.26	9181.36	215.2	2.817	0.925958	24.3719	-46.1521
284	249.26	9219.7	215.8	2.861	0.925748	24.4922	-46.566
285	250.26	9257.46	215.6	2.847	0.92554	24.6107	-46.9746
286	251.26	9295.41	215.4	2.845	0.925333	24.729	-47.3988
287	252.26	9333.4	215.8	2.883	0.925126	24.8475	-47.8235
288	253.26	9370.88	216	2.943	0.924927	24.964	-48.261
289	254.26	9407.63	216.3	3.002	0.924729	25.0777	-48.7147
290	255.26	9443.64	216	3.014	0.924532	25.189	-49.1592
291	256.26	9479.53	216.5	3.048	0.924341	25.2991	-49.6307
292	257.26	9515.02	216.9	3.126	0.924149	25.4075	-50.1098
293	258.26	9549.64	215.6	2.918	0.923954	25.5132	-50.5771
294	259.26	9586.72	216	2.946	0.923754	25.6253	-51.0362
295	260.26	9623.47	216.4	2.993	0.923555	25.7361	-51.4843
296	261.26	9659.65	215.5	2.872	0.923356	25.8451	-51.9265
297	262.26	9697.36	216	2.953	0.923158	25.9575	-52.3946
298	263.26	9734.05	216.3	3.021	0.922959	26.0669	-52.85
299	264.26	9769.91	216.6	3.087	0.922764	26.1733	-53.3011
300	265.26	9805.01	215.9	2.887	0.922568	26.2767	-53.751
301	266.26	9842.55	215.4	2.882	0.922371	26.3872	-54.2322
302	267.26	9880.17	216	2.883	0.922169	26.497	-54.6915
303	268.26	9917.79	215.7	2.888	0.921967	26.6064	-55.1395
304	269.26	9955.34	215.4	2.792	0.921762	26.7156	-55.5865
305	270.26	9994.19	215.3	2.794	0.921556	26.8273	-56.0234
306	271.26	10033	215.5	2.83	0.921349	26.9391	-56.4603
307	272.26	10071.4	215.8	2.9	0.921155	27.0489	-56.9217
308	273.26	10108.8	216.8	3.12	0.920961	27.1552	-57.4115
309	274.26	10143.6	216.2	3.009	0.920766	27.2541	-57.8669
310	275.26	10179.7	215.8	2.915	0.920567	27.3555	-58.3216
311	276.26	10217	215.4	2.827	0.920368	27.4598	-58.783
312	277.26	10255.4	215.7	2.869	0.920167	27.5673	-59.2583
313	278.26	10293.3	215.7	2.814	0.919963	27.6719	-59.7005
314	279.26	10331.9	214.9	2.78	0.919759	27.7786	-60.1515
315	280.26	10371	215.4	2.788	0.919557	27.886	-60.6132
316	281.26	10410	215.9	2.937	0.919356	27.9923	-61.0812
317	282.26	10447.1	216.7	3.054	0.919159	28.0932	-61.5255
318	283.26	10482.7	216.3	3.049	0.91897	28.1889	-62.008
319	284.26	10518.4	216.1	2.987	0.918781	28.2845	-62.5072
320	285.26	10554.8	216.9	3.143	0.918592	28.382	-63.0169
321	286.26	10589.5	216.3	3.038	0.918402	28.4727	-63.4996
322	287.26	10625.3	215.8	2.934	0.918213	28.5666	-63.9991
323	288.26	10662.4	215.5	2.846	0.918014	28.6634	-64.5037
324	289.26	10700.7	215.6	2.856	0.917813	28.7617	-64.9722
325	290.26	10738.8	215.7	2.846	0.917612	28.8597	-65.4391
326	291.26	10777.1	215.5	2.863	0.917412	28.9571	-65.9149
327	292.26	10815.2	216	2.936	0.917213	29.0531	-66.3933
328	293.26	10852.4	216.3	2.927	0.917012	29.1468	-66.8599
329	294.26	10889.6	215.1	2.833	0.916811	29.2391	-67.3205
330	295.26	10928.1	215.5	2.796	0.91661	29.3343	-67.7957
331	296.26	10967.1	215.7	2.852	0.916405	29.4303	-68.271
332	297.26	11005.4	215	2.749	0.916199	29.5232	-68.7229
333	298.26	11045.1	215.8	2.889	0.915995	29.6197	-69.1918
334	299.26	11082.9	216.2	2.895	0.915795	29.7101	-69.6614
335	300.26	11120.6	215.2	2.828	0.915595	29.7999	-70.1386
336	301.26	11159.2	215.4	2.803	0.915391	29.8916	-70.6237
337	302.26	11198.2	215.5	2.792	0.915185	29.9824	-71.0867
338	303.26	11237.3	215.1	2.789	0.914979	30.0736	-71.5517
339	304.26	11276.5	215.5	2.808	0.914775	30.1639	-72.0236
340	305.26	11315.5	215.7	2.863	0.914571	30.2528	-72.4977
341	306.26	11353.6	215.5	2.84	0.914369	30.3399	-72.9626
342	307.26	11392.1	215.8	2.886	0.914168	30.4258	-73.4551
343	308.26	11430	215.9	2.933	0.913968	30.5102	-73.9408
344	309.26	11467.3	216.2	2.98	0.913775	30.5925	-74.4359
345	310.26	11504.1	216.5	3.084	0.913583	30.6719	-74.9574
346	311.26	11539.5	216.6	3.04	0.913391	30.7487	-75.4615
347	312.26	11575.6	215.9	2.981	0.913193	30.8252	-75.9597
348	313.26	11612.3	215.8	2.889	0.912996	30.9021	-76.4574
349	314.26	11650.2	215.5	2.748	0.912789	30.9814	-76.9711
350	315.26	11690.1	214.2	2.626	0.91257	31.0629	-77.4126
351	316.26	11731.8	214.7	2.626	0.912351	31.148	-77.8607
352	317.26	11773.5	215.1	2.699	0.912135	31.2322	-78.315
353	318.26	11814.2	214.9	2.698	0.911918	31.3131	-78.7647
354	319.26	11854.8	216	2.981	0.911713	31.394	-79.2146
355	320.26	11891.6	216.6	3.003	0.911516	31.4651	-79.7235
356	321.26	11928.1	215.9	2.969	0.911319	31.5356	-80.2294
357	322.26	11965.1	215.6	2.856	0.911112	31.6063	-80.7263
358	323.26	12003.5	215.3	2.772	0.910904	31.6778	-81.2019
359	324.26	12043.1	215.2	2.738	0.910692	31.7516	-81.692
360	325.26	12083.2	215	2.707	0.910473	31.8246	-82.1536
361	326.26	12123.8	214.9	2.662	0.910254	31.8978	-82.6056
362	327.26	12165.1	214.4	2.581	0.910025	31.9718	-83.0514
363	328.26	12207.6	214.1	2.503	0.909793	32.0466	-83.466
364	329.26	12251.6	214	2.497	0.90956	32.1237	-83.8936
365	330.26	12295.6	214.7	2.556	0.909325	32.1993	-84.3092
366	331.26	12338.6	213.9	2.459	0.909088	32.2731	-84.7145
367	332.26	12383.4	213.3	2.428	0.908845	32.3488	-85.1142
368	333.26	12428.7	214.5	2.469	0.908602	32.4248	-85.5069
369	334.26	12473.3	213.8	2.441	0.908357	32.4989	-85.8888
370	335.26	12518.4	213.3	2.35	0.908111	32.5731	-86.2694
371	336.26	12565.2	213.6	2.366	0.907859	32.6497	-86.6573
372	337.26	12611.8	213.2	2.317	0.907606	32.7248	-87.0164
373	338.26	12659.4	213	2.281	0.907357	32.8013	-87.3857
374	339.26	12707.7	214.2	2.515	0.907109	32.8777	-87.7862
375	340.26	12751.5	214.2	2.518	0.906868	32.947	-88.1497
376	341.26	12795.3	214.2	2.533	0.906633	33.0147	-88.5669
377	342.26	12838.8	214.5	2.534	0.906396	33.0818	-88.9865
378	343.26	12882.4	214	2.476	0.906155	33.1476	-89.39
379	344.26	12926.9	213.6	2.379	0.905913	33.2143	-89.7933
380	345.26	12973.3	213.1	2.296	0.905653	33.2831	-90.1821
381	346.26	13021.4	212.9	2.242	0.905393	33.3533	-90.5357
382	347.26	13070.7	212.7	2.204	0.905123	33.4249	-90.8837
383	348.26	13120.8	212.5	2.172	0.904852	33.4969	-91.2069
384	349.26	13171.7	212.5	2.168	0.904579	33.5696	-91.5316
385	350.26	13222.7	212.6	2.192	0.904306	33.6417	-91.8505
386	351.26	13273.1	212.9	2.229	0.904038	33.7127	-92.1757
387	352.26	13322.7	212.9	2.245	0.903771	33.7818	-92.5125
388	353.26	13372	212.9	2.246	0.903505	33.8499	-92.8489
389	354.26	13421.3	212.9	2.219	0.903238	33.9173	-93.1892
390	355.26	13471.2	212.3	2.154	0.902965	33.985	-93.523
391	356.26	13522.6	212.3	2.158	0.90269	34.054	-93.8447
392	357.26	13573.9	213.1	2.214	0.902419	34.1225	-94.1719
393	358.26	13624	212.6	2.198	0.902148	34.1884	-94.5011
394	359.26	13674.4	212.5	2.204	0.901881	34.2544	-94.8392
395	360.26	13724.7	213.2	2.284	0.901614	34.3193	-95.1866
396	361.26	13773.3	213.4	2.339	0.901357	34.3814	-95.5394
397	362.26	13820.7	213.4	2.325	0.9011	34.4411	-95.9126
398	363.26	13868.5	212.9	2.278	0.900841	34.5006	-96.285
399	364.26	13917.2	213.3	2.305	0.900581	34.56	-96.6573
400	365.26	13965.4	213.4	2.343	0.900326	34.6184	-97.0319
401	366.26	14012.8	213.6	2.389	0.900072	34.6743	-97.424
402	367.26	14059.3	213.9	2.448	0.89982	34.729	-97.81
403	368.26	14104.7	213.4	2.342	0.899569	34.7805	-98.1985
404	369.26	14152.1	213	2.27	0.89931	34.8343	-98.6044
405	370.26	14201.1	213.2	2.292	0.899046	34.8879	-98.9753
406	371.26	14249.7	213.2	2.296	0.898784	34.9409	-99.3397
407	372.26	14298.1	213.2	2.32	0.898522	34.992	-99.7151
408	373.26	14346.1	213.9	2.364	0.898258	35.0424	-100.088
409	374.26	14393.2	212.4	2.203	0.897991	35.0903	-100.438
410	375.26	14443.7	212.6	2.184	0.897722	35.1413	-100.81
411	376.26	14494.7	213	2.272	0.897451	35.1912	-101.177
412	377.26	14543.8	213.5	2.367	0.897186	35.2388	-101.527
413	378.26	14590.9	213.8	2.395	0.896931	35.2829	-101.913
414	379.26	14637.4	213.3	2.357	0.896674	35.3259	-102.311
415	380.26	14684.7	213.4	2.337	0.896412	35.3681	-102.703
416	381.26	14732.5	213.4	2.348	0.896151	35.4098	-103.09
417	382.26	14780	213.5	2.379	0.895892	35.4501	-103.484
418	383.26	14826.9	213.9	2.395	0.895633	35.4886	-103.879
419	384.26	14873.5	213.4	2.351	0.89537	35.526	-104.267
420	385.26	14921	213.1	2.313	0.895106	35.5625	-104.653
421	386.26	14969.3	213.5	2.375	0.894846	35.5988	-105.053
422	387.26	15016.4	214.2	2.464	0.894586	35.6324	-105.457
423	388.26	15061.7	213.4	2.352	0.894315	35.6644	-105.838
424	389.26	15109.3	212.4	2.157	0.894041	35.6958	-106.19
425	390.26	15161.1	212.6	2.172	0.893756	35.7298	-106.567
426	391.26	15212.6	212.6	2.176	0.893467	35.7615	-106.892
427	392.26	15264.1	212.4	2.143	0.893174	35.7929	-107.215
428	393.26	15316.3	212.2	2.142	0.892881	35.823	-107.533
429	394.26	15368.6	212.9	2.198	0.89259	35.8525	-107.855
430	395.26	15419.6	212.5	2.173	0.8923	35.8798	-108.179
431	396.26	15471.2	212.3	2.137	0.892005	35.9068	-108.502
432	397.26	15523.6	212.3	2.149	0.891709	35.9327	-108.819
433	398.26	15575.8	212.7	2.17	0.891413	35.9576	-109.137
434	399.26	15627.5	212.3	2.149	0.891117	35.9809	-109.454
435	400.26	15679.7	212.3	2.125	0.890816	36.0035	-109.766
436	401.26	15732.6	212.1	2.097	0.890514	36.0251	-110.072
437	402.26	15786.1	211.9	2.104	0.890209	36.0458	-110.375
438	403.26	15839.5	212.9	2.171	0.889904	36.0656	-110.674
439	404.26	15891.2	212	2.104	0.889601	36.0832	-110.97
440	405.26	15944.7	212.2	2.097	0.889295	36.1008	-111.279
441	406.26	15998.3	212.2	2.111	0.888987	36.1166	-111.577
442	407.26	16051.6	212.1	2.089	0.888676	36.1318	-111.871
443	408.26	16105.5	212	2.075	0.888364	36.1452	-112.157
444	409.26	16159.7	212.4	2.137	0.888053	36.1583	-112.446
445	410.26	16212.4	212.2	2.113	0.887744	36.1691	-112.741
446	411.26	16265.7	212.1	2.083	0.887428	36.1794	-113.034
447	412.26	16319.8	211.9	2.043	0.887111	36.1881	-113.311
448	413.26	16375	211.5	2.036	0.886789	36.1962	-113.588
449	414.26	16430.4	212.6	2.104	0.886467	36.2029	-113.859
450	415.26	16484	212	2.088	0.886149	36.2081	-114.13
451	416.26	16538	211.8	2.051	0.885828	36.2124	-114.41
452	417.26	16593.1	212	2.059	0.885504	36.2151	-114.683
453	418.26	16647.9	211.5	1.997	0.885172	36.2171	-114.949
454	419.26	16704.5	211.5	1.977	0.884832	36.2172	-115.184
455	420.26	16761.7	210.9	1.879	0.884478	36.2169	-115.407
456	421.26	16821.8	210.5	1.823	0.884117	36.2149	-115.584
457	422.26	16883.8	210.5	1.824	0.883747	36.2121	-115.753
458	423.26	16945.9	211.3	1.93	0.883385	36.2084	-115.905
459	424.26	17004.5	211	1.907	0.883033	36.2037	-116.099
460	425.26	17063.9	211.3	1.94	0.882681	36.1983	-116.304
461	426.26	17122.3	211.3	1.932	0.882328	36.1913	-116.507
462	427.26	17181	211	1.9	0.88197	36.1835	-116.703
463	428.26	17240.7	210.9	1.883	0.881607	36.1745	-116.892
464	429.26	17300.9	210.7	1.84	0.881238	36.164	-117.061
465	430.26	17362.5	210.6	1.821	0.88086	36.1526	-117.222
466	431.26	17424.9	210.3	1.779	0.880477	36.1397	-117.357
467	432.26	17488.8	209.9	1.73	0.880082	36.1258	-117.473
468	433.26	17554.4	210.2	1.748	0.879683	36.1107	-117.572
469	434.26	17619.5	209.7	1.692	0.87928	36.0947	-117.655
470	435.26	17686.7	209.4	1.648	0.878862	36.0777	-117.719
471	436.26	17755.7	209.4	1.657	0.878446	36.0597	-117.761
472	437.26	17824.4	209.9	1.719	0.878034	36.0409	-117.808
473	438.26	17890.7	210.7	1.819	0.877644	36.0222	-117.893
474	439.26	17953.3	211.2	1.912	0.877263	36.0039	-118.007
475	440.26	18012.9	210.7	1.828	0.876889	35.985	-118.162
476	441.26	18075.3	209.9	1.73	0.876488	35.9647	-118.301
477	442.26	18141.2	209.4	1.662	0.876081	35.942	-118.389
478	443.26	18209.9	210.5	1.75	0.875666	35.9174	-118.453
479	444.26	18275.2	208.8	1.595	0.875232	35.8935	-118.491
480	445.26	18346.8	208.8	1.565	0.874789	35.8667	-118.494
481	446.26	18419.8	209	1.582	0.874339	35.8389	-118.462
482	447.26	18492.1	209	1.589	0.873892	35.811	-118.431
483	448.26	18564.2	209	1.595	0.873446	35.7831	-118.405
484	449.26	18636	209.1	1.601	0.873001	35.7547	-118.384
485	450.26	18707.5	209	1.587	0.872555	35.7262	-118.361
486	451.26	18779.7	208.7	1.556	0.872099	35.697	-118.329
487	452.26	18853.4	208.3	1.49	0.871629	35.6671	-118.279
488	453.26	18930.4	208.3	1.488	0.871153	35.6357	-118.174
489	454.26	19007.5	208.6	1.523	0.870679	35.6043	-118.073
490	455.26	19082.9	208.4	1.508	0.870206	35.5737	-117.979
491	456.26	19159.1	208.3	1.496	0.86973	35.5428	-117.885
492	457.26	19236	208.3	1.487	0.869248	35.5118	-117.778
493	458.26	19313.3	207.7	1.435	0.86876	35.4808	-117.65
494	459.26	19393.6	208.3	1.492	0.868274	35.4489	-117.514
495	460.26	19470.8	208.6	1.521	0.8678	35.4185	-117.394
496	461.26	19546.5	208.5	1.514	0.867327	35.3888	-117.302
497	462.26	19622.7	208.3	1.496	0.866851	35.3591	-117.202
498	463.26	19699.8	208.4	1.493	0.866372	35.3291	-117.094
499	464.26	19777.1	207.9	1.449	0.865883	35.2992	-116.974
500	465.26	19856.8	208.4	1.487	0.865396	35.2687	-116.831
501	466.26	19934.5	207.8	1.436	0.864904	35.2394	-116.7
502	467.26	20015	207.6	1.409	0.8644	35.2095	-116.534
503	468.26	20097.1	207.7	1.42	0.863894	35.1797	-116.349
504	469.26	20178.6	207.9	1.436	0.863394	35.1507	-116.167
505	470.26	20259.3	208.1	1.464	0.862902	35.1227	-115.998
506	471.26	20338.5	208	1.461	0.862413	35.0959	-115.853
507	472.26	20417.8	208.3	1.489	0.861928	35.0694	-115.712
508	473.26	20495.8	208.5	1.512	0.861452	35.0439	-115.588
509	474.26	20572.5	208.2	1.487	0.860973	35.019	-115.476
510	475.26	20650.6	208.2	1.49	0.860496	34.994	-115.355
511	476.26	20728.6	208.9	1.554	0.860024	34.9694	-115.243
512	477.26	20803.5	208.6	1.523	0.859559	34.946	-115.152
513	478.26	20879.9	208	1.471	0.859079	34.9223	-115.056
514	479.26	20959	208.8	1.567	0.858614	34.8979	-114.933
515	480.26	21033.3	209.2	1.61	0.858158	34.8753	-114.868
516	481.26	21105.7	208.8	1.553	0.857705	34.8533	-114.815
517	482.26	21180.8	208.6	1.536	0.857242	34.8304	-114.754
518	483.26	21256.7	209	1.586	0.856784	34.8073	-114.673
519	484.26	21330.3	208.9	1.581	0.85633	34.7849	-114.619
520	485.26	21404.1	208.9	1.576	0.855875	34.7624	-114.563
521	486.26	21478.3	208.9	1.569	0.855418	34.7398	-114.504
522	487.26	21552.8	208.8	1.567	0.854961	34.717	-114.44
523	488.26	21627.4	209	1.584	0.854504	34.6942	-114.376
524	489.26	21701.3	208.9	1.593	0.854052	34.6716	-114.32
525	490.26	21774.8	209.6	1.647	0.853611	34.649	-114.278
526	491.26	21846	208.9	1.588	0.853165	34.627	-114.262
527	492.26	21919.8	209.3	1.63	0.852715	34.6039	-114.218
528	493.26	21991.7	209.5	1.655	0.852276	34.5812	-114.188
529	494.26	22062.6	209.4	1.659	0.851842	34.5586	-114.177
530	495.26	22133.4	210	1.715	0.851412	34.5357	-114.179
531	496.26	22201.8	209.5	1.69	0.850987	34.513	-114.199
532	497.26	22271.4	210.5	1.799	0.850579	34.4894	-114.238
533	498.26	22336.7	210.9	1.852	0.850173	34.4666	-114.315
534	499.26	22400.2	210	1.74	0.849767	34.4435	-114.391
535	500.26	22467.8	209.9	1.709	0.849344	34.4183	-114.462
536	501.26	22536.7	209.6	1.678	0.848915	34.3917	-114.486
537	502.26	22607	210	1.724	0.848485	34.3641	-114.503
538	503.26	22675.3	209.8	1.707	0.848055	34.3367	-114.518
539	504.26	22744.4	209.6	1.674	0.847619	34.3084	-114.537
540	505.26	22814.9	209.2	1.63	0.847175	34.2789	-114.522
541	506.26	22887.3	209.5	1.66	0.84673	34.2483	-114.501
542	507.26	22958.5	209.9	1.703	0.846291	34.2179	-114.48
543	508.26	23027.8	209.4	1.66	0.845853	34.1876	-114.48
544	509.26	23099.1	209.8	1.692	0.845412	34.156	-114.474
545	510.26	23169	209.4	1.644	0.844965	34.1247	-114.46
546	511.26	23241	209.1	1.611	0.844511	34.0919	-114.43
547	512.26	23314.5	209.2	1.605	0.84405	34.0581	-114.373
548	513.26	23388.3	208.8	1.573	0.843581	34.024	-114.301
549	514.26	23463.7	209.1	1.602	0.843117	33.989	-114.218
550	515.26	23537.7	209.4	1.637	0.842659	33.9545	-114.146
551	516.26	23610.2	209.7	1.69	0.842212	33.9204	-114.108
552	517.26	23680.5	209.8	1.701	0.841772	33.8871	-114.089
553	518.26	23750.3	209.1	1.621	0.841321	33.8535	-114.083
554	519.26	23823.6	209.4	1.653	0.840866	33.8176	-114.029
555	520.26	23895.6	210	1.729	0.840426	33.7821	-114.001
556	521.26	23964.4	210.2	1.747	0.839992	33.7477	-113.998
557	522.26	24032.5	209.6	1.695	0.839555	33.7129	-114.014
558	523.26	24102.8	209.5	1.669	0.839107	33.6765	-114.004
559	524.26	24174.2	210.1	1.715	0.838665	33.6389	-113.984
560	525.26	24243.7	209.3	1.653	0.838217	33.6018	-113.976
561	526.26	24315.9	209.9	1.677	0.837761	33.5626	-113.939
562	527.26	24387.1	208.6	1.566	0.837288	33.5237	-113.877
563	528.26	24463.4	209.3	1.631	0.83682	33.4818	-113.787
564	529.26	24536.6	209.6	1.66	0.836352	33.4412	-113.712
565	530.26	24608.7	208.8	1.561	0.835882	33.4012	-113.633
566	531.26	24685.3	208.6	1.543	0.835393	33.3584	-113.528
567	532.26	24762.8	208.9	1.559	0.834903	33.3151	-113.391
568	533.26	24839.7	208.4	1.511	0.834405	33.2723	-113.253
569	534.26	24919	208.2	1.485	0.833896	33.2284	-113.075
570	535.26	24999.8	208.2	1.48	0.833383	33.1842	-112.878
571	536.26	25080.8	208.1	1.46	0.832863	33.1403	-112.669
572	537.26	25163.1	207.6	1.41	0.83233	33.0964	-112.441
573	538.26	25248.3	208.3	1.466	0.831802	33.052	-112.168
574	539.26	25330.2	207.4	1.406	0.831277	33.0103	-111.936
575	540.26	25415.8	208.3	1.484	0.830751	32.9676	-111.682
576	541.26	25497	208.6	1.529	0.830247	32.928	-111.466
577	542.26	25575.8	208.5	1.526	0.82975	32.89	-111.288
578	543.26	25654.7	208.9	1.551	0.829253	32.8525	-111.123
579	544.26	25732.4	207.7	1.443	0.828745	32.816	-110.957
580	545.26	25816.1	208.1	1.466	0.828224	32.7775	-110.73
581	546.26	25898.4	208.4	1.511	0.827714	32.7404	-110.506
582	547.26	25978.4	208.6	1.53	0.827216	32.705	-110.312
583	548.26	26057.4	208.7	1.538	0.82672	32.6706	-110.14
584	549.26	26136	208.5	1.516	0.826219	32.6371	-109.975
585	550.26	26215.8	208	1.468	0.825713	32.6036	-109.782
586	551.26	26298.3	209	1.56	0.825214	32.5696	-109.587
587	552.26	26376	208.1	1.481	0.824709	32.5383	-109.408
588	553.26	26457.9	208.2	1.486	0.824201	32.5059	-109.206
589	554.26	26539.5	208.8	1.542	0.823699	32.4746	-108.996
590	555.26	26618.3	208.5	1.524	0.823206	32.4452	-108.824
591	556.26	26698	208.5	1.528	0.82271	32.4159	-108.652
592	557.26	26777.6	208.7	1.546	0.82222	32.3873	-108.48
593	558.26	26856.2	209.3	1.619	0.821742	32.3596	-108.323
594	559.26	26931.4	208.8	1.574	0.821275	32.3336	-108.215
595	560.26	27008.8	210.1	1.737	0.820814	32.307	-108.126
596	561.26	27078.9	210	1.726	0.820374	32.2828	-108.071
597	562.26	27149.6	209.4	1.641	0.819918	32.2584	-108.05
598	563.26	27223.9	208.9	1.598	0.819454	32.2326	-107.961
599	564.26	27300.2	210.1	1.715	0.818996	32.2061	-107.878
600	565.26	27371.5	209	1.614	0.818531	32.1814	-107.805
601	566.26	27447.1	209.3	1.612	0.81806	32.1553	-107.712
602	567.26	27523	208.7	1.563	0.817585	32.1293	-107.595
603	568.26	27601.2	209.3	1.625	0.817108	32.1029	-107.47
604	569.26	27676.5	209.4	1.64	0.816642	32.0777	-107.356
605	570.26	27751.2	208.5	1.541	0.816163	32.0529	-107.263
606	571.26	27830.7	209.2	1.606	0.815683	32.027	-107.105
607	572.26	27907	209.5	1.675	0.815219	32.0025	-106.993
608	573.26	27980.3	210	1.727	0.814775	31.9792	-106.923
609	574.26	28051.3	210.4	1.794	0.814344	31.9565	-106.891
610	575.26	28119.8	210.6	1.802	0.813919	31.9341	-106.913
611	576.26	28188	209.7	1.711	0.813479	31.9116	-106.916
612	577.26	28259.8	209.1	1.609	0.813016	31.8875	-106.89
613	578.26	28336.2	209.1	1.603	0.812545	31.8618	-106.778
614	579.26	28413	209.4	1.649	0.812075	31.8362	-106.665
615	580.26	28487.7	209.9	1.708	0.811622	31.8116	-106.576
616	581.26	28559.8	209.6	1.672	0.811166	31.7878	-106.516
617	582.26	28633.6	209.4	1.654	0.810708	31.7635	-106.447
618	583.26	28708.2	209.7	1.665	0.810248	31.7389	-106.368
619	584.26	28782.2	208.9	1.597	0.809774	31.7147	-106.274
620	585.26	28859.6	209	1.574	0.809291	31.6895	-106.151
621	586.26	28938.1	208.5	1.546	0.808805	31.6646	-105.995
622	587.26	29018.1	209.4	1.627	0.808323	31.6398	-105.836
623	588.26	29094.1	209.5	1.684	0.807864	31.6167	-105.719
624	589.26	29167.6	210.7	1.803	0.807429	31.5945	-105.654
625	590.26	29236.3	210.2	1.78	0.806998	31.5735	-105.659
626	591.26	29305.9	210.2	1.761	0.806564	31.5519	-105.656
627	592.26	29376.3	210.2	1.757	0.806128	31.5298	-105.648
628	593.26	29447	210	1.733	0.805687	31.5073	-105.635
629	594.26	29518.6	209.9	1.727	0.805243	31.4842	-105.601
630	595.26	29590.5	210.1	1.747	0.804802	31.4608	-105.568
631	596.26	29661.6	210.2	1.773	0.804366	31.4374	-105.542
632	597.26	29731.7	210.4	1.794	0.803931	31.414	-105.536
633	598.26	29801.1	210.1	1.748	0.803496	31.3905	-105.527
634	599.26	29872.3	210	1.733	0.803052	31.3662	-105.511
635	600.26	29944.1	210	1.724	0.802603	31.3413	-105.474
636	601.26	30016.4	209.5	1.674	0.802148	31.3161	-105.417
637	602.26	30090.9	209.7	1.682	0.801688	31.2901	-105.346
638	603.26	30165.1	209.8	1.69	0.801229	31.2642	-105.266
639	604.26	30238.9	209.4	1.663	0.800773	31.2384	-105.19
640	605.26	30314	210.2	1.764	0.800319	31.2123	-105.12
641	606.26	30384.8	210.6	1.816	0.799887	31.1874	-105.083
642	607.26	30453.7	210	1.732	0.799444	31.1631	-105.084
643	608.26	30525.9	209.7	1.694	0.798993	31.1372	-105.035
644	609.26	30599.8	209.9	1.716	0.798537	31.1106	-104.975
645	610.26	30672.8	209.9	1.712	0.798083	31.0842	-104.909
646	611.26	30745.9	209.6	1.661	0.797617	31.0577	-104.846
647	612.26	30821.4	208.9	1.587	0.797138	31.0305	-104.729
648	613.26	30900.5	208.9	1.586	0.796648	31.0024	-104.576
649	614.26	30979.6	209.4	1.636	0.796169	30.9748	-104.417
650	615.26	31056.4	209.8	1.688	0.795701	30.9484	-104.285
651	616.26	31130.8	209.3	1.643	0.795233	30.9232	-104.19
652	617.26	31207.3	209.5	1.642	0.79476	30.8975	-104.076
653	618.26	31284	208.9	1.599	0.794279	30.872	-103.946
654	619.26	31362.7	209.9	1.7	0.793812	30.8463	-103.804
655	620.26	31436.8	209.5	1.671	0.793349	30.8224	-103.714
656	621.26	31512.2	209.8	1.693	0.792886	30.7983	-103.62
657	622.26	31586.7	209.6	1.674	0.792422	30.7747	-103.526
658	623.26	31662.1	209.3	1.619	0.791946	30.7509	-103.425
659	624.26	31740.1	208.5	1.549	0.791458	30.7267	-103.281
660	625.26	31821.7	209.3	1.613	0.790963	30.7022	-103.093
661	626.26	31900	208.8	1.578	0.790475	30.6794	-102.916
662	627.26	31980.2	209.3	1.615	0.789991	30.6568	-102.748
663	628.26	32058.6	209.2	1.613	0.789509	30.6353	-102.59
664	629.26	32137.1	209	1.598	0.789029	30.6146	-102.438
665	630.26	32216.4	209.5	1.648	0.78855	30.5944	-102.288
666	631.26	32293.4	209	1.609	0.788072	30.5753	-102.145
667	632.26	32372.3	209.6	1.665	0.787603	30.5562	-102.005
668	633.26	32448.5	209.9	1.717	0.787145	30.5384	-101.888
669	634.26	32522.5	209.9	1.724	0.786695	30.5214	-101.819
670	635.26	32596.2	210.2	1.742	0.786248	30.5046	-101.759
671	636.26	32669.3	209.5	1.666	0.785788	30.488	-101.697
672	637.26	32745.7	209.2	1.638	0.785324	30.4709	-101.599
673	638.26	32823.4	209.9	1.708	0.78486	30.4539	-101.483
674	639.26	32898	210	1.729	0.78441	30.4379	-101.396
675	640.26	32971.8	209.8	1.708	0.783957	30.4223	-101.328
676	641.26	33046.4	210.1	1.743	0.783509	30.4067	-101.254
677	642.26	33119.7	209.9	1.716	0.78306	30.3916	-101.201
678	643.26	33194.1	209.3	1.644	0.782597	30.3764	-101.122
679	644.26	33271.8	209.6	1.666	0.782131	30.3607	-101.013
680	645.26	33348.5	209.6	1.667	0.781665	30.3458	-100.897
681	646.26	33425.3	209.5	1.658	0.781199	30.3314	-100.784
682	647.26	33502.5	209.4	1.644	0.78073	30.3175	-100.665
683	648.26	33580.4	209.6	1.666	0.780266	30.3039	-100.543
684	649.26	33657.3	209.9	1.736	0.779817	30.2909	-100.432
685	650.26	33731.2	210.5	1.806	0.779384	30.2789	-100.384
686	651.26	33802.2	211.5	1.954	0.778973	30.2671	-100.401
687	652.26	33867.9	210.9	1.891	0.778565	30.256	-100.448
688	653.26	33935.9	211	1.89	0.778152	30.2439	-100.506
689	654.26	34003.9	210.4	1.797	0.777732	30.2313	-100.537
690	655.26	34075.4	210.4	1.793	0.7773	30.2178	-100.548
691	656.26	34147.2	210.3	1.79	0.776868	30.2039	-100.534
692	657.26	34219.1	210.5	1.809	0.776436	30.1899	-100.52
693	658.26	34290.3	210.3	1.788	0.776003	30.1758	-100.506
694	659.26	34362.3	210.6	1.807	0.77557	30.1615	-100.49
695	660.26	34433.7	210	1.751	0.775134	30.1471	-100.473
696	661.26	34507.4	210.4	1.791	0.774694	30.1321	-100.441
697	662.26	34579.4	210.4	1.795	0.774259	30.1174	-100.409
698	663.26	34651.4	210.6	1.814	0.773826	30.1026	-100.39
699	664.26	34722.6	210.1	1.748	0.773385	30.0878	-100.372
700	665.26	34796.6	209.2	1.643	0.772923	30.0725	-100.308
701	666.26	34875.3	209.8	1.69	0.77246	30.0565	-100.2
702	667.26	34951.9	210.3	1.779	0.772013	30.0412	-100.091
703	668.26	35024.7	210.5	1.796	0.771575	30.027	-100.059
704	669.26	35096.9	210.1	1.757	0.771136	30.0128	-100.026
705	670.26	35170.7	210.1	1.766	0.770694	29.9983	-99.9867
706	671.26	35244.2	210.8	1.854	0.770265	29.9839	-99.9417
707	672.26	35314.2	210.8	1.874	0.769848	29.9699	-99.9601
708	673.26	35383.6	211.3	1.928	0.769439	29.9557	-100.001
709	674.26	35451	210.8	1.867	0.769022	29.9415	-100.058
710	675.26	35520.6	210.5	1.826	0.768598	29.9261	-100.078
711	676.26	35591.9	210.5	1.82	0.768169	29.9101	-100.084
712	677.26	35663.4	210.9	1.855	0.767742	29.8938	-100.082
713	678.26	35733.6	210.5	1.82	0.76731	29.8774	-100.089
714	679.26	35805.2	210	1.718	0.766866	29.8605	-100.06
715	680.26	35881.1	209.4	1.66	0.766401	29.8426	-99.9911
716	681.26	35959.7	210.5	1.789	0.76595	29.8243	-99.8797
717	682.26	36032.7	210.1	1.751	0.765498	29.8075	-99.8271
718	683.26	36107.3	209.3	1.646	0.765036	29.7906	-99.7402
719	684.26	36186.7	209.7	1.691	0.764569	29.7729	-99.6277
720	685.26	36264.1	210.3	1.777	0.764121	29.756	-99.5183
721	686.26	36337.7	210.5	1.81	0.763682	29.7401	-99.4693
722	687.26	36410.1	210.7	1.817	0.763249	29.7245	-99.4468
723	688.26	36482.2	209.9	1.736	0.7628	29.7089	-99.4143
724	689.26	36557.7	209.2	1.626	0.76233	29.6925	-99.3457
725	690.26	36638.4	209.6	1.657	0.761852	29.6756	-99.1863
726	691.26	36717.6	209.2	1.625	0.761375	29.6597	-99.035
727	692.26	36798.4	209.3	1.631	0.760893	29.6443	-98.874
728	693.26	36879	209.6	1.66	0.760419	29.6297	-98.712
729	694.26	36958.2	209.4	1.652	0.759946	29.6161	-98.5659
730	695.26	37037.8	209.8	1.692	0.759479	29.6033	-98.4238
731	696.26	37115.7	209.7	1.698	0.759019	29.5915	-98.3067
732	697.26	37193.2	210.4	1.749	0.758566	29.5801	-98.209
733	698.26	37268.6	208.9	1.615	0.758094	29.5695	-98.116
734	699.26	37350.3	210.3	1.76	0.757639	29.5586	-97.9614
735	700.26	37425.3	210.1	1.766	0.757201	29.5492	-97.9004
736	701.26	37500.1	211.1	1.896	0.756775	29.5399	-97.8773
737	702.26	37569.8	210.6	1.838	0.756353	29.5312	-97.878
738	703.26	37641.8	210.2	1.797	0.755929	29.522	-97.8875
739	704.26	37715.4	211.3	1.903	0.755504	29.5124	-97.89
740	705.26	37784.9	210.5	1.839	0.755082	29.5031	-97.8951
741	706.26	37857	210.5	1.83	0.754658	29.4933	-97.9058
742	707.26	37929.4	211.1	1.893	0.75424	29.4832	-97.9093
743	708.26	37999.5	211.3	1.966	0.753836	29.473	-97.9535
744	709.26	38066.9	212.1	2.058	0.753448	29.4628	-98.0308
745	710.26	38131.4	211.8	2.045	0.753064	29.4522	-98.158
746	711.26	38196.4	211.9	2.053	0.752679	29.4406	-98.2887
747	712.26	38261.1	211.8	2.015	0.752287	29.4284	-98.4173
748	713.26	38327.1	211.1	1.935	0.751888	29.4148	-98.5174
749	714.26	38395.8	211.2	1.934	0.75148	29.3999	-98.5946
750	715.26	38464.6	211.3	1.923	0.751067	29.3844	-98.651
751	716.26	38533.8	210.7	1.858	0.750648	29.3682	-98.695
752	717.26	38605.6	210.6	1.855	0.75022	29.3509	-98.7088
753	718.26	38677.4	211.4	1.93	0.749805	29.3332	-98.7226
754	719.26	38746.5	210.9	1.882	0.749385	29.3158	-98.7644
755	720.26	38817.4	210.8	1.876	0.748961	29.2973	-98.7809
756	721.26	38888.6	211.1	1.898	0.74854	29.2784	-98.7983
757	722.26	38958.9	210.9	1.877	0.748117	29.2593	-98.8202
758	723.26	39030.1	211	1.887	0.747695	29.2394	-98.8367
759	724.26	39101	211	1.913	0.747275	29.2191	-98.8612
760	725.26	39171	211.6	1.978	0.746867	29.1986	-98.8992
761	726.26	39238.7	211.4	1.972	0.746458	29.1781	-98.9677
762	727.26	39306.6	211.3	1.942	0.746048	29.1567	-99.0308
763	728.26	39375.6	211.2	1.925	0.745632	29.1343	-99.0871
764	729.26	39445.3	210.8	1.866	0.745205	29.1111	-99.1292
765	730.26	39517.2	210.5	1.815	0.744765	29.0864	-99.1189
766	731.26	39591.2	210.1	1.743	0.744309	29.0609	-99.0709
767	732.26	39668.3	209.2	1.641	0.743828	29.0343	-98.9753
768	733.26	39750.2	209.8	1.682	0.743344	29.0064	-98.8006
769	734.26	39830.2	209	1.611	0.742854	28.9799	-98.6355
770	735.26	39913.8	209.1	1.605	0.742354	28.953	-98.4275
771	736.26	39997.7	209.3	1.622	0.741856	28.927	-98.2066
772	737.26	40080.8	209.2	1.615	0.741359	28.9022	-97.9916
773	738.26	40164.4	209.1	1.608	0.74086	28.8784	-97.7764
774	739.26	40248.3	209.2	1.621	0.740366	28.8556	-97.555
775	740.26	40331.6	209.7	1.676	0.739882	28.8342	-97.3524
776	741.26	40412.3	209.8	1.69	0.739405	28.8144	-97.1896
777	742.26	40492.3	209.2	1.627	0.738921	28.7954	-97.0274
778	743.26	40575.5	209.2	1.611	0.738425	28.7765	-96.8347
779	744.26	40659.5	208.8	1.564	0.73792	28.7586	-96.6131
780	745.26	40746.1	208.6	1.556	0.737413	28.7416	-96.3536
781	746.26	40833.3	209.8	1.667	0.736918	28.7263	-96.093
782	747.26	40914.7	209.4	1.639	0.736436	28.7132	-95.9049
783	748.26	40997.5	208.7	1.574	0.735941	28.7011	-95.7081
784	749.26	41083.8	209.7	1.659	0.735455	28.6897	-95.4867
785	750.26	41165.8	209.3	1.632	0.734972	28.6801	-95.2949
786	751.26	41249.2	209.1	1.635	0.734492	28.6716	-95.1056
787	752.26	41332.5	210.4	1.764	0.734028	28.6644	-94.9305
788	753.26	41409.7	210.3	1.767	0.733582	28.6584	-94.833
789	754.26	41486.8	209.9	1.729	0.733129	28.6529	-94.7529
790	755.26	41565.7	210.3	1.774	0.732682	28.6478	-94.6605
791	756.26	41642.6	210.5	1.809	0.732242	28.6433	-94.5863
792	757.26	41718.2	210.4	1.815	0.731808	28.6392	-94.5411
793	758.26	41793.4	210.9	1.869	0.731382	28.6353	-94.5155
794	759.26	41866.6	210.6	1.834	0.730954	28.6315	-94.5032
795	760.26	41941.2	210.6	1.833	0.730525	28.6277	-94.4868
796	761.26	42015.9	210.6	1.822	0.730094	28.624	-94.4633
797	762.26	42091.1	210.4	1.796	0.729657	28.6203	-94.4286
798	763.26	42167.4	209.9	1.739	0.729209	28.6168	-94.3764
799	764.26	42246.2	210.2	1.756	0.72876	28.6136	-94.2863
800	765.26	42324.4	210	1.744	0.728312	28.6111	-94.2019
801	766.26	42403.1	210.2	1.77	0.727865	28.609	-94.1185
802	767.26	42480.7	210.3	1.778	0.727423	28.6074	-94.0422
803	768.26	42558.1	210.4	1.807	0.726987	28.6063	-93.9777
804	769.26	42634.2	210.8	1.848	0.726559	28.6056	-93.9396
805	770.26	42708.7	210.9	1.883	0.726139	28.6049	-93.9313
806	771.26	42781.8	211.1	1.91	0.725727	28.6043	-93.9448
807	772.26	42853.9	211.3	1.919	0.725313	28.6036	-93.9761
808	773.26	42925.8	210.5	1.833	0.724896	28.6026	-94.0006
809	774.26	43001.1	210.8	1.869	0.724472	28.6015	-94.0058
810	775.26	43074.9	211.3	1.921	0.72406	28.6004	-94.0099
811	776.26	43146.8	211	1.888	0.723644	28.5991	-94.0445
812	777.26	43220	210.6	1.85	0.723224	28.5977	-94.0545
813	778.26	43294.8	210.9	1.879	0.722803	28.5962	-94.0601
814	779.26	43368.4	210.9	1.895	0.722388	28.5946	-94.0678
815	780.26	43441.4	211.6	1.969	0.721979	28.5928	-94.091
816	781.26	43511.8	211	1.908	0.721575	28.5909	-94.1445
817	782.26	43584.4	211.1	1.904	0.721161	28.5885	-94.1942
818	783.26	43657.2	210.8	1.86	0.720741	28.5859	-94.2232
819	784.26	43731.8	210.6	1.835	0.720309	28.5831	-94.2187
820	785.26	43807.5	209.8	1.718	0.719866	28.5804	-94.1713
821	786.26	43888.3	210.5	1.793	0.719422	28.5778	-94.099
822	787.26	43965.9	210.1	1.751	0.718976	28.5757	-94.0264
823	788.26	44045.3	209.8	1.733	0.718528	28.5741	-93.9457
824	789.26	44125.6	210.6	1.809	0.718081	28.5732	-93.8563
825	790.26	44202.6	210	1.729	0.717638	28.5727	-93.7803
826	791.26	44283.2	209.6	1.687	0.717177	28.5729	-93.6886
827	792.26	44365.8	210	1.725	0.716721	28.5737	-93.56
828	793.26	44446.7	210.1	1.75	0.716271	28.5755	-93.446
829	794.26	44526.5	210.1	1.745	0.715824	28.5781	-93.3569
830	795.26	44606.6	210.1	1.746	0.715377	28.5814	-93.2693
831	796.26	44686.6	209.8	1.716	0.714925	28.5853	-93.1746
832	797.26	44768.1	209.8	1.707	0.714471	28.5901	-93.0662
833	798.26	44850.1	210.1	1.767	0.714027	28.5958	-92.948
834	799.26	44929.4	210.7	1.827	0.713595	28.6022	-92.8861
835	800.26	45006.1	210.7	1.837	0.713172	28.6087	-92.8583
836	801.26	45082.4	210.3	1.789	0.712741	28.6155	-92.8365
837	802.26	45160.8	210.4	1.799	0.71231	28.6228	-92.7984
838	803.26	45238.9	210.6	1.827	0.711882	28.6305	-92.7575
839	804.26	45315.8	210.5	1.818	0.711459	28.6385	-92.7337
840	805.26	45393.1	210.7	1.857	0.711039	28.6468	-92.7224
841	806.26	45468.8	211.4	1.947	0.710637	28.655	-92.7316
842	807.26	45541.1	211.2	1.937	0.710237	28.6629	-92.7921
843	808.26	45613.7	211.4	1.946	0.709837	28.6704	-92.858
844	809.26	45686.1	210.9	1.9	0.709434	28.6777	-92.9185
845	810.26	45760.3	211.7	1.967	0.709033	28.685	-92.9727
846	811.26	45832	210.5	1.851	0.708629	28.6917	-93.0357
847	812.26	45908.3	211.2	1.942	0.708219	28.6987	-93.0758
848	813.26	45981	211.7	2.002	0.707828	28.7051	-93.1271
849	814.26	46051.6	211.1	1.924	0.70743	28.7111	-93.219
850	815.26	46125	211.5	1.944	0.707026	28.7168	-93.2841
851	816.26	46197.8	210.3	1.826	0.706613	28.7223	-93.3227
852	817.26	46275.3	211.4	1.942	0.706208	28.7281	-93.3531
853	818.26	46348.2	211.6	2.01	0.705816	28.7333	-93.4021
854	819.26	46418.7	211.9	2.053	0.705434	28.7378	-93.5184
855	820.26	46487.8	212	2.071	0.705055	28.7417	-93.6483
856	821.26	46556.3	211.2	1.968	0.70467	28.7449	-93.7864
857	822.26	46628.4	212.3	2.077	0.704283	28.7473	-93.9006
858	823.26	46696.7	211.4	1.968	0.703896	28.749	-94.011
859	824.26	46768.9	210.9	1.905	0.70349	28.7503	-94.1141
860	825.26	46843.5	211.4	1.933	0.703079	28.751	-94.1571
861	826.26	46917.1	210.4	1.805	0.702661	28.7515	-94.1882
862	827.26	46996	209.9	1.743	0.70222	28.7521	-94.1692
863	828.26	47077.7	210.7	1.816	0.701782	28.7529	-94.1046
864	829.26	47156.1	209.5	1.674	0.701329	28.7541	-94.0489
865	830.26	47241.3	210.4	1.761	0.700877	28.7563	-93.9142
866	831.26	47322.3	209.6	1.695	0.700434	28.7592	-93.8281
867	832.26	47406.5	210.5	1.813	0.699991	28.7629	-93.7459
868	833.26	47485.3	210.4	1.804	0.69956	28.7668	-93.6832
869	834.26	47564.6	210.3	1.783	0.699126	28.7712	-93.6432
870	835.26	47644.8	210.4	1.796	0.698693	28.7762	-93.5933
871	836.26	47724.5	210.5	1.808	0.698261	28.7815	-93.5529
872	837.26	47803.7	210	1.758	0.697826	28.7872	-93.5057
873	838.26	47885.3	210.7	1.815	0.697395	28.7935	-93.4565
874	839.26	47964.3	209.9	1.726	0.696953	28.8	-93.4116
875	840.26	48047.4	209.9	1.726	0.696509	28.8075	-93.3262
876	841.26	48130.6	210.5	1.791	0.696071	28.8159	-93.239
877	842.26	48210.8	210.4	1.775	0.695637	28.8246	-93.1854
878	843.26	48291.8	209.5	1.672	0.695187	28.834	-93.115
879	844.26	48377.9	209.5	1.669	0.694727	28.8448	-92.9932
880	845.26	48464.1	209.8	1.709	0.694274	28.8569	-92.8493
881	846.26	48548.4	210	1.72	0.693825	28.87	-92.7362
882	847.26	48632.2	209.4	1.661	0.693372	28.8842	-92.6311
883	848.26	48719.1	209.4	1.647	0.692914	28.9002	-92.4899
884	849.26	48806.7	210.1	1.76	0.692468	28.9177	-92.3562
885	850.26	48888.8	211	1.867	0.692052	28.935	-92.29
886	851.26	48966.2	211	1.88	0.691646	28.9519	-92.2954
887	852.26	49043.1	210.3	1.796	0.69123	28.969	-92.3359
888	853.26	49123.6	210.2	1.765	0.690803	28.9871	-92.3099
889	854.26	49205.6	210.3	1.783	0.690376	29.0062	-92.2684
890	855.26	49286.9	210.6	1.819	0.689956	29.0257	-92.2367
891	856.26	49366.6	210.3	1.78	0.689534	29.0454	-92.221
892	857.26	49448	209.8	1.729	0.689104	29.0661	-92.1931
893	858.26	49531.9	210.4	1.787	0.688676	29.0883	-92.1278
894	859.26	49613.2	210.5	1.807	0.688257	29.1105	-92.0976
895	860.26	49693.6	210.4	1.795	0.687839	29.1331	-92.0834
896	861.26	49774.6	210.2	1.768	0.687419	29.1563	-92.0681
897	862.26	49856.8	211.1	1.895	0.687012	29.1805	-92.0469
898	863.26	49933.7	210.6	1.83	0.686603	29.2036	-92.0885
899	864.26	50013.2	210	1.736	0.686181	29.2278	-92.0879
900	865.26	50097.2	209.8	1.709	0.685747	29.254	-92.0436
901	866.26	50182.5	209.8	1.708	0.685311	29.2816	-91.9683
902	867.26	50267.9	210	1.73	0.684879	29.3104	-91.8881
903	868.26	50352.3	210.1	1.758	0.684454	29.34	-91.8237
904	869.26	50435.4	210.3	1.793	0.684041	29.3702	-91.7907
905	870.26	50517	211	1.883	0.683637	29.4005	-91.8027
906	871.26	50594.7	210.7	1.855	0.68324	29.4297	-91.8412
907	872.26	50673.6	210.8	1.859	0.682842	29.4596	-91.8933
908	873.26	50752.3	210.7	1.829	0.682439	29.4897	-91.9421
909	874.26	50832.4	210	1.751	0.682027	29.5207	-91.9636
910	875.26	50916.1	210.2	1.77	0.68161	29.5538	-91.9477
911	876.26	50999	210.6	1.815	0.6812	29.5873	-91.9364
912	877.26	51079.9	210.3	1.794	0.680792	29.6206	-91.9436
913	878.26	51161.8	210.6	1.835	0.68039	29.6549	-91.9587
914	879.26	51241.8	211.1	1.893	0.679998	29.689	-91.9953
915	880.26	51319.5	211	1.889	0.679611	29.7223	-92.0764
916	881.26	51397.4	210.7	1.854	0.67922	29.7558	-92.1558
917	882.26	51476.8	210.9	1.871	0.678831	29.79	-92.2283
918	883.26	51555.5	211.3	1.931	0.678448	29.8241	-92.3034
919	884.26	51631.9	210.7	1.873	0.678069	29.8572	-92.4111
920	885.26	51710.6	211.9	2.034	0.677695	29.8912	-92.5358
921	886.26	51783.2	211.7	2.018	0.677333	29.9223	-92.6762
922	887.26	51856.3	211.4	1.962	0.676964	29.9532	-92.8493
923	888.26	51931.6	211.4	1.959	0.676588	29.9845	-92.9937
924	889.26	52007	210.6	1.839	0.676205	30.0156	-93.1062
925	890.26	52087.4	210.9	1.877	0.675816	30.0486	-93.2013
926	891.26	52166.3	211.4	1.937	0.675437	30.081	-93.288
927	892.26	52242.7	210.8	1.89	0.675058	30.1123	-93.4108
928	893.26	52321.1	211.4	1.957	0.674679	30.1442	-93.5205
929	894.26	52396.8	211.5	1.974	0.674309	30.1748	-93.6495
930	895.26	52472	211.2	1.943	0.673936	30.2049	-93.7961
931	896.26	52548.3	211.4	1.962	0.673566	30.2351	-93.9369
932	897.26	52624	211.5	1.986	0.6732	30.2644	-94.09
933	898.26	52698.8	212	2.062	0.672841	30.2929	-94.2682
934	899.26	52770.8	212.1	2.08	0.672491	30.3198	-94.4653
935	900.26	52842.3	211.8	2.036	0.672135	30.3455	-94.6885
936	901.26	52915.4	211.6	2.013	0.671775	30.3709	-94.8825
937	902.26	52989.4	211.9	2.052	0.671417	30.3958	-95.0786
938	903.26	53061.9	212	2.067	0.671063	30.4195	-95.2805
939	904.26	53134	212	2.066	0.670711	30.442	-95.4985
940	905.26	53206.2	212.3	2.106	0.670361	30.4634	-95.7259
941	906.26	53277	211.8	2.038	0.670003	30.4837	-95.9442
942	907.26	53350.2	210.9	1.894	0.669627	30.5036	-96.1504
943	908.26	53429.1	210.9	1.888	0.669246	30.5242	-96.2628
944	909.26	53508.2	212	2.069	0.668875	30.5443	-96.4054
945	910.26	53580.5	212.2	2.094	0.668521	30.5621	-96.5796
946	911.26	53651.9	211.8	2.027	0.668161	30.5789	-96.802
947	912.26	53725.8	211.6	1.996	0.667791	30.5949	-96.9911
948	913.26	53800.8	210.7	1.845	0.667406	30.6106	-97.1347
949	914.26	53882	210.6	1.842	0.667008	30.627	-97.2391
950	915.26	53963.4	211.3	1.923	0.66662	30.643	-97.3115
951	916.26	54041.4	210.7	1.863	0.666228	30.6581	-97.4227
952	917.26	54122	210.8	1.861	0.665829	30.6733	-97.5004
953	918.26	54202.7	210.4	1.797	0.665426	30.6884	-97.5589
954	919.26	54286.3	210.5	1.804	0.665017	30.7039	-97.6033
955	920.26	54369.7	210.1	1.758	0.664604	30.7194	-97.6312
956	921.26	54455.2	211	1.891	0.664205	30.7355	-97.6441
957	922.26	54534.9	211	1.876	0.663808	30.7505	-97.7294
958	923.26	54615.2	210.1	1.761	0.663402	30.7653	-97.7919
959	924.26	54700.8	210	1.737	0.662982	30.7812	-97.814
960	925.26	54787.6	210.1	1.743	0.66256	30.7976	-97.8018
961	926.26	54874.2	209.9	1.724	0.662137	30.8144	-97.7833
962	927.26	54961.8	210.2	1.772	0.66172	30.8319	-97.7614
963	928.26	55047	210.5	1.827	0.661316	30.8493	-97.7675
964	929.26	55129.8	211.1	1.898	0.660926	30.8664	-97.8317
965	930.26	55209.5	211.4	1.966	0.660547	30.8825	-97.9464
966	931.26	55286.5	211.6	1.98	0.660175	30.8975	-98.0906
967	932.26	55363	210.8	1.873	0.659789	30.9118	-98.2454
968	933.26	55443.9	210.6	1.806	0.659388	30.9262	-98.3516
969	934.26	55527.9	209.6	1.711	0.658973	30.9409	-98.3852
970	935.26	55616.6	210.5	1.799	0.658556	30.9566	-98.3834
971	936.26	55701	210.7	1.829	0.658152	30.9718	-98.4054
972	937.26	55784.1	209.9	1.737	0.657737	30.9869	-98.4404
973	938.26	55871.6	210.1	1.748	0.657319	31.0029	-98.4462
974	939.26	55958.7	210.7	1.837	0.656914	31.0192	-98.4467
975	940.26	56041.5	210.2	1.772	0.656505	31.0348	-98.5054
976	941.26	56127.5	210.1	1.749	0.656087	31.0511	-98.5196
977	942.26	56214.6	209.6	1.685	0.655661	31.0679	-98.5055
978	943.26	56305.1	209.7	1.684	0.655229	31.0861	-98.4631
979	944.26	56395.8	209.7	1.694	0.654798	31.105	-98.407
980	945.26	56485.9	210	1.741	0.654377	31.1246	-98.3648
981	946.26	56573.7	210.4	1.794	0.653968	31.1443	-98.3576
982	947.26	56659	210.4	1.792	0.653563	31.1638	-98.3896
983	948.26	56744.4	210.3	1.79	0.653159	31.1835	-98.4317
984	949.26	56829.9	210.5	1.822	0.652762	31.2033	-98.4774
985	950.26	56914	211.2	1.914	0.652374	31.2226	-98.5596
986	951.26	56994.1	211.2	1.93	0.651997	31.2407	-98.6771
987	952.26	57073.5	211	1.902	0.651614	31.2582	-98.8141
988	953.26	57154.2	210	1.749	0.651212	31.2754	-98.9366
989	954.26	57242	210.9	1.88	0.650819	31.2939	-98.96
990	955.26	57323.8	211.5	1.961	0.650443	31.3108	-99.083
991	956.26	57402.2	211.4	1.97	0.650074	31.3264	-99.2423
992	957.26	57480.3	211.8	2.019	0.649714	31.3412	-99.4292
993	958.26	57556.5	212.4	2.103	0.649359	31.3547	-99.6388
994	959.26	57629.7	211.3	1.968	0.648997	31.366	-99.8735
995	960.26	57708	211.1	1.912	0.64862	31.3772	-100.057
996	961.26	57788.7	211.2	1.941	0.648242	31.3877	-100.211
997	962.26	57868.1	211.7	2.006	0.647874	31.3972	-100.369
998	963.26	57945.1	211.5	1.964	0.647501	31.4054	-100.559
999	964.26	58023.7	210.8	1.882	0.647119	31.4126	-100.716
1000	965.26	58105.8	210.9	1.887	0.646729	31.4193	-100.844
1001	966.26	58187.8	211.3	1.932	0.646346	31.4253	-100.965
1002	967.26	58267.9	211.2	1.951	0.645969	31.4304	-101.104
1003	968.26	58347.2	212.3	2.113	0.645611	31.4344	-101.265
1004	969.26	58420.5	212.5	2.143	0.645264	31.4365	-101.529
1005	970.26	58492.8	212	2.093	0.644914	31.4372	-101.796
1006	971.26	58566.9	212.5	2.14	0.644565	31.4364	-102.064
1007	972.26	58639.4	212.1	2.111	0.644216	31.4336	-102.334
1008	973.26	58712.9	212.5	2.158	0.643865	31.4288	-102.604
1009	974.26	58784.9	212.5	2.158	0.643516	31.4226	-102.872
1010	975.26	58856.9	211.7	2.036	0.643156	31.4148	-103.145
1011	976.26	58933.3	212.3	2.107	0.6428	31.4041	-103.374
1012	977.26	59007.1	212.9	2.24	0.642453	31.392	-103.648
1013	978.26	59076.6	212.7	2.197	0.642108	31.3789	-103.933
1014	979.26	59147.5	211.9	2.068	0.64175	31.3636	-104.235
1015	980.26	59222.8	212.2	2.089	0.641381	31.3449	-104.466
1016	981.26	59297.5	211.6	2.011	0.641007	31.3247	-104.673
1017	982.26	59375	211.6	1.995	0.640624	31.302	-104.868
1018	983.26	59453.3	211.8	2.037	0.640245	31.2776	-105.036
1019	984.26	59530	212.1	2.076	0.639873	31.2515	-105.23
1020	985.26	59605.3	212.5	2.143	0.639506	31.2241	-105.452
1021	986.26	59678.2	212	2.077	0.639133	31.1959	-105.676
1022	987.26	59753.6	211.4	1.979	0.638748	31.165	-105.89
1023	988.26	59832.7	212	2.054	0.638363	31.13	-106.047
1024	989.26	59908.9	212	2.076	0.637985	31.0946	-106.231
1025	990.26	59984.5	212.1	2.094	0.637609	31.0578	-106.434
1026	991.26	60059.3	212.5	2.134	0.637235	31.0195	-106.645
1027	992.26	60132.9	211.8	2.042	0.63685	30.9792	-106.863
1028	993.26	60209.8	211.2	1.928	0.636448	30.9352	-107.02
1029	994.26	60291.3	210.9	1.891	0.63603	30.8868	-107.126
1030	995.26	60374.4	211.2	1.925	0.635612	30.8359	-107.194
1031	996.26	60456.2	211.1	1.907	0.635193	30.7844	-107.262
1032	997.26	60538.7	211.2	1.937	0.634778	30.7305	-107.327
1033	998.26	60620.1	211.9	2.023	0.634367	30.6757	-107.423
1034	999.26	60698	210.8	1.871	0.633949	30.6217	-107.508
1035	1000.26	60782.3	210.8	1.868	0.633515	30.5617	-107.569
1036	1001.26	60866.8	211.3	1.929	0.633088	30.4999	-107.592
1037	1002.26	60948.7	210.9	1.88	0.632656	30.4385	-107.643
1038	1003.26	61032.8	210.8	1.867	0.632219	30.3738	-107.662
1039	1004.26	61117.5	210.8	1.866	0.631779	30.3072	-107.668
1040	1005.26	61202.3	210.7	1.865	0.631337	30.239	-107.666
1041	1006.26	61287.3	211.3	1.925	0.630904	30.1694	-107.674
1042	1007.26	61369.6	211.1	1.911	0.630471	30.1005	-107.702
1043	1008.26	61452.6	211.3	1.931	0.630039	30.0294	-107.735
1044	1009.26	61534.8	211	1.907	0.629605	29.957	-107.771
1045	1010.26	61618.1	211.3	1.942	0.629169	29.882	-107.798
1046	1011.26	61699.9	211.1	1.913	0.628733	29.8066	-107.824
1047	1012.26	61783.1	210.8	1.865	0.628284	29.7284	-107.836
1048	1013.26	61868.4	210.7	1.844	0.627829	29.6466	-107.814
1049	1014.26	61954.8	211.3	1.931	0.627382	29.5622	-107.772
1050	1015.26	62037.3	210.8	1.87	0.626931	29.4798	-107.776
1051	1016.26	62122.6	210.7	1.851	0.626468	29.3931	-107.737
1052	1017.26	62208.9	210.1	1.769	0.625997	29.304	-107.66
1053	1018.26	62299.2	211.1	1.897	0.625531	29.2093	-107.573
1054	1019.26	62383.4	210.8	1.879	0.625074	29.1197	-107.511
1055	1020.26	62468.6	211	1.894	0.624617	29.0278	-107.469
1056	1021.26	62553.1	211.1	1.882	0.624155	28.9348	-107.429
1057	1022.26	62638.2	210	1.756	0.623673	28.8394	-107.371
1058	1023.26	62729.5	210.1	1.746	0.623171	28.7358	-107.204
1059	1024.26	62821.4	209.7	1.703	0.622663	28.6307	-107.004
1060	1025.26	62915.7	209.9	1.711	0.622149	28.5222	-106.775
1061	1026.26	63009.7	209.6	1.675	0.621637	28.4135	-106.531
1062	1027.26	63105.7	211	1.866	0.621141	28.3017	-106.313
1063	1028.26	63192	209.8	1.725	0.620641	28.2005	-106.14
1064	1029.26	63285.4	209.6	1.682	0.620116	28.0901	-105.922
1065	1030.26	63381.3	209.9	1.717	0.619595	27.9763	-105.645
1066	1031.26	63475.3	210.3	1.769	0.619087	27.8642	-105.391
1067	1032.26	63566.6	209.7	1.704	0.618569	27.7548	-105.17
1068	1033.26	63661.5	210.1	1.742	0.618054	27.6406	-104.91
1069	1034.26	63754.4	210.5	1.812	0.617552	27.5281	-104.668
1070	1035.26	63843.8	210.8	1.833	0.617057	27.4191	-104.487
1071	1036.26	63932.2	210	1.762	0.616556	27.3103	-104.32
1072	1037.26	64024.2	210.4	1.793	0.61605	27.196	-104.105
1073	1038.26	64114.8	210.9	1.865	0.615556	27.0827	-103.907
1074	1039.26	64201.9	211	1.887	0.615071	26.9726	-103.754
1075	1040.26	64288	210.5	1.836	0.614579	26.8626	-103.613
1076	1041.26	64376.6	210.8	1.858	0.614085	26.7483	-103.449
1077	1042.26	64464.3	210.9	1.868	0.613592	26.6339	-103.283
1078	1043.26	64551.5	210.5	1.821	0.613091	26.5189	-103.123
1079	1044.26	64641.1	210.5	1.809	0.612582	26.3996	-102.918
1080	1045.26	64731.3	210.5	1.806	0.612068	26.2784	-102.693
1081	1046.26	64821.8	210.2	1.763	0.611544	26.1561	-102.45
1082	1047.26	64914.6	209.6	1.689	0.611004	26.0301	-102.159
1083	1048.26	65011.5	209.8	1.702	0.610456	25.8981	-101.809
1084	1049.26	65107.7	209.9	1.722	0.609911	25.7668	-101.448
1085	1050.26	65202.9	210.1	1.738	0.609369	25.6369	-101.101
1086	1051.26	65297.3	209.6	1.686	0.60882	25.508	-100.752
1087	1052.26	65394.8	210.1	1.739	0.608273	25.3749	-100.38
1088	1053.26	65489.3	209.6	1.68	0.607718	25.2457	-100.015
1089	1054.26	65587.3	209.7	1.679	0.607156	25.112	-99.6133
1090	1055.26	65685.3	209.3	1.639	0.606584	24.9785	-99.1842
1091	1056.26	65785.9	209.1	1.608	0.605998	24.8422	-98.7102
1092	1057.26	65888.5	209.2	1.618	0.605411	24.7042	-98.1947
1093	1058.26	65990.6	209.2	1.615	0.604824	24.5681	-97.6784
1094	1059.26	66093	208.8	1.562	0.604222	24.4329	-97.1464
1095	1060.26	66198.9	208.4	1.512	0.603602	24.2947	-96.5462
1096	1061.26	66308.5	208.6	1.541	0.602984	24.154	-95.8865
1097	1062.26	66416.1	209.2	1.602	0.602379	24.0184	-95.252
1098	1063.26	66519.7	208.8	1.56	0.601773	23.8899	-94.6693
1099	1064.26	66626.3	208.2	1.493	0.601148	23.76	-94.0458
1100	1065.26	66737.7	208.7	1.557	0.600528	23.627	-93.3352
1101	1066.26	66844.6	210.1	1.711	0.599956	23.5023	-92.7001
1102	1067.26	66942.1	208.8	1.579	0.599372	23.3905	-92.2684
1103	1068.26	67047.7	209.3	1.624	0.598779	23.271	-91.6654
1104	1069.26	67150.6	209	1.584	0.598185	23.157	-91.1129
1105	1070.26	67256.1	209.4	1.652	0.597603	23.0423	-90.5165
1106	1071.26	67357.4	209.9	1.717	0.597041	22.9344	-89.9982
1107	1072.26	67455	209.6	1.67	0.596474	22.8322	-89.549
1108	1073.26	67555.4	209	1.584	0.595887	22.7286	-89.0482
1109	1074.26	67661.3	209.3	1.628	0.5953	22.6218	-88.4467
1110	1075.26	67764.5	209.6	1.674	0.594728	22.5203	-87.8881
1111	1076.26	67864.9	209.6	1.674	0.59416	22.4238	-87.381
1112	1077.26	67965.5	209.2	1.627	0.593583	22.3292	-86.8725
1113	1078.26	68069.1	209.4	1.651	0.593007	22.2343	-86.3162
1114	1079.26	68171.2	210.2	1.737	0.592453	22.1432	-85.7881
1115	1080.26	68268.4	209.2	1.627	0.591882	22.0586	-85.3297
1116	1081.26	68372.2	209.2	1.61	0.591297	21.9706	-84.7727
1117	1082.26	68477.3	209	1.596	0.590708	21.8847	-84.1756
1118	1083.26	68583.3	209	1.6	0.590117	21.8015	-83.5588
1119	1084.26	68689.2	209.6	1.671	0.589547	21.7219	-82.9553
1120	1085.26	68790.7	209.9	1.719	0.588996	21.6487	-82.431
1121	1086.26	68889.4	210.3	1.771	0.588461	21.58	-81.9755
1122	1087.26	68985.4	210.2	1.763	0.587931	21.5153	-81.5702
1123	1088.26	69081.9	209.8	1.727	0.58739	21.4521	-81.1623
1124	1089.26	69180.5	210.7	1.825	0.586869	21.3897	-80.7347
1125	1090.26	69273.8	210.6	1.838	0.58636	21.3324	-80.3828
1126	1091.26	69366.6	211.2	1.91	0.585862	21.2768	-80.0681
1127	1092.26	69456	210.3	1.791	0.585351	21.2244	-79.7986
1128	1093.26	69551.4	210.6	1.817	0.584836	21.1699	-79.4404
1129	1094.26	69645.4	209.7	1.711	0.584301	21.1178	-79.0906
1130	1095.26	69745.4	210.2	1.778	0.583769	21.0648	-78.6204
1131	1096.26	69841.8	211.2	1.899	0.583266	21.0161	-78.221
1132	1097.26	69932.1	210.5	1.838	0.582771	20.9722	-77.9505
1133	1098.26	70025.5	211.2	1.901	0.582272	20.9281	-77.6471
1134	1099.26	70115.8	210.7	1.859	0.581779	20.8868	-77.3646
1135	1100.26	70208.3	211	1.907	0.58129	20.8459	-77.0843
1136	1101.26	70298.5	211.6	1.978	0.580813	20.8071	-76.836
1137	1102.26	70385.6	211.1	1.95	0.580339	20.7707	-76.6278
1138	1103.26	70473.9	212.4	2.106	0.579887	20.7344	-76.4411
1139	1104.26	70555.8	211.6	1.995	0.579429	20.7011	-76.3318
1140	1105.26	70642.3	211.5	2.003	0.57897	20.6663	-76.18
1141	1106.26	70728.5	212.3	2.106	0.57852	20.632	-76.0332
1142	1107.26	70810.6	212.4	2.134	0.578082	20.5995	-75.9497
1143	1108.26	70891.7	212.1	2.09	0.577642	20.5673	-75.8862
1144	1109.26	70974.5	212.1	2.085	0.5772	20.5342	-75.812
1145	1110.26	71057.6	213.3	2.336	0.576787	20.5008	-75.7408
1146	1111.26	71131.8	213.7	2.387	0.57639	20.4703	-75.8205
1147	1112.26	71204.5	213.6	2.407	0.576002	20.4392	-75.9416
1148	1113.26	71276.6	214.2	2.466	0.57562	20.4071	-76.0922
1149	1114.26	71347.1	213.1	2.296	0.575219	20.3743	-76.263
1150	1115.26	71422.8	212.9	2.25	0.574805	20.3374	-76.3289
1151	1116.26	71500.1	212.9	2.236	0.574386	20.2986	-76.3644
1152	1117.26	71578	212.5	2.182	0.573958	20.2588	-76.3776
1153	1118.26	71657.8	213.1	2.255	0.573535	20.2172	-76.3676
1154	1119.26	71735.1	212.5	2.187	0.573107	20.1759	-76.3794
1155	1120.26	71814.9	212.5	2.197	0.572678	20.1326	-76.3547
1156	1121.26	71894.4	214.1	2.393	0.572266	20.0886	-76.366
1157	1122.26	71967.4	212.1	2.128	0.571833	20.0475	-76.4061
1158	1123.26	72049.6	212.2	2.104	0.571387	20.0002	-76.3689
1159	1124.26	72132.8	212.3	2.115	0.570935	19.9518	-76.2665
1160	1125.26	72215.6	212.2	2.103	0.570484	19.9033	-76.1625
1161	1126.26	72299	212.2	2.113	0.570031	19.8544	-76.057
1162	1127.26	72382	212.2	2.093	0.569576	19.8054	-75.9458
1163	1128.26	72465.9	211.7	2.018	0.569106	19.7558	-75.8167
1164	1129.26	72553	211.4	1.96	0.568624	19.7043	-75.6304
1165	1130.26	72642.7	210.9	1.872	0.568121	19.652	-75.38
1166	1131.26	72736.8	210.3	1.805	0.567599	19.5984	-75.0311
1167	1132.26	72834.4	210.8	1.839	0.567074	19.5448	-74.6092
1168	1133.26	72930.3	210.4	1.817	0.566556	19.4943	-74.2122
1169	1134.26	73027.4	211.1	1.914	0.566052	19.4453	-73.8171
1170	1135.26	73119.7	212.3	2.096	0.565571	19.4005	-73.5245
1171	1136.26	73204.1	211	1.921	0.565098	19.3605	-73.3078
1172	1137.26	73296.2	212.3	2.082	0.564629	19.3177	-73.0943
1173	1138.26	73381.3	211.2	1.962	0.564152	19.2788	-72.899
1174	1139.26	73471.6	211.6	1.995	0.563673	19.2383	-72.6698
1175	1140.26	73560.6	211.4	1.96	0.56319	19.1993	-72.4319
1176	1141.26	73651.2	211	1.903	0.562696	19.1608	-72.1726
1177	1142.26	73744.6	211.6	2	0.562215	19.1226	-71.8546
1178	1143.26	73833.5	211.8	2.039	0.561749	19.0875	-71.6322
1179	1144.26	73920.8	212.2	2.096	0.561292	19.0539	-71.455
1180	1145.26	74005.8	212.3	2.133	0.560843	19.0216	-71.3174
1181	1146.26	74089.4	212.6	2.139	0.560399	18.9901	-71.2076
1182	1147.26	74172.9	211.1	1.948	0.559925	18.9589	-71.0852
1183	1148.26	74264.6	211.7	2.011	0.559451	18.9252	-70.8495
1184	1149.26	74353.4	211.7	2.029	0.558982	18.8937	-70.6227
1185	1150.26	74441.6	212	2.077	0.558523	18.8635	-70.424
1186	1151.26	74527.8	212.4	2.133	0.558076	18.8346	-70.2772
1187	1152.26	74611.8	212.5	2.178	0.557639	18.8068	-70.1736
1188	1153.26	74694.1	213.2	2.286	0.557216	18.7795	-70.1215
1189	1154.26	74772.6	213.4	2.327	0.556807	18.7532	-70.1219
1190	1155.26	74849.8	212.9	2.23	0.556384	18.7267	-70.1668
1191	1156.26	74930.4	212.3	2.139	0.555948	18.6983	-70.1371
1192	1157.26	75014.5	212.3	2.13	0.555502	18.6686	-70.0492
1193	1158.26	75099	212.3	2.117	0.555054	18.6389	-69.9367
1194	1159.26	75184.1	211.7	2.049	0.554595	18.6092	-69.8038
1195	1160.26	75272.1	212.3	2.112	0.554141	18.5791	-69.6368
1196	1161.26	75357.6	212.2	2.112	0.55369	18.5503	-69.4931
1197	1162.26	75443.1	212	2.075	0.553234	18.522	-69.3624
1198	1163.26	75530.2	211.8	2.049	0.552774	18.4937	-69.196
1199	1164.26	75618.4	212.1	2.086	0.552312	18.4658	-69.015
1200	1165.26	75705.2	211.7	2.023	0.551848	18.4391	-68.8331
1201	1166.26	75794.8	211.6	1.977	0.551373	18.4125	-68.6248
1202	1167.26	75886.6	210.8	1.874	0.550875	18.3865	-68.3547
1203	1168.26	75983.4	210.9	1.88	0.55037	18.3612	-67.9977
1204	1169.26	76080.1	210.9	1.893	0.54987	18.3384	-67.6253
1205	1170.26	76176.2	211.4	1.952	0.549383	18.3184	-67.2764
1206	1171.26	76269.4	211.5	1.987	0.548908	18.301	-66.9826
1207	1172.26	76361.1	212.2	2.092	0.548451	18.2858	-66.7381
1208	1173.26	76448.3	211.6	2.01	0.547988	18.2726	-66.5736
1209	1174.26	76539	212	2.042	0.547524	18.2602	-66.3518
1210	1175.26	76628.5	211.4	1.971	0.547054	18.2494	-66.1467
1211	1176.26	76721.2	210.9	1.898	0.546572	18.2398	-65.8823
1212	1177.26	76817.6	211.5	1.975	0.546089	18.2321	-65.5705
1213	1178.26	76910.4	211.1	1.923	0.54561	18.2269	-65.2796
1214	1179.26	77005.7	211.2	1.932	0.545129	18.224	-64.9827
1215	1180.26	77100.7	211.4	1.971	0.544655	18.2235	-64.6889
1216	1181.26	77193.8	211.6	1.999	0.54419	18.2253	-64.4264
1217	1182.26	77285.7	211.6	2.008	0.543729	18.2291	-64.1944
1218	1183.26	77377.3	211.9	2.033	0.543274	18.2348	-63.9807
1219	1184.26	77467.9	211.4	1.97	0.542811	18.2421	-63.7792
1220	1185.26	77561.4	211.4	1.967	0.542344	18.2518	-63.5383
1221	1186.26	77655.1	210.8	1.864	0.541861	18.2637	-63.2765
1222	1187.26	77754.1	210.8	1.866	0.541375	18.2794	-62.9246
1223	1188.26	77853.1	212	2.046	0.540917	18.2986	-62.5764
1224	1189.26	77943.4	211.2	1.968	0.540461	18.3187	-62.398
1225	1190.26	78037.4	212.2	2.064	0.540013	18.3418	-62.1615
1226	1191.26	78127.1	211.6	2.021	0.539573	18.3659	-62.0049
1227	1192.26	78218.8	211.9	2.048	0.539127	18.3924	-61.8397
1228	1193.26	78309.4	211.3	1.962	0.538683	18.4205	-61.6622
1229	1194.26	78404	212.4	2.125	0.538247	18.452	-61.4933
1230	1195.26	78491.5	211.7	2.039	0.537813	18.4829	-61.3583
1231	1196.26	78582.6	212.3	2.097	0.537384	18.5169	-61.2295
1232	1197.26	78671.4	212	2.072	0.536957	18.5516	-61.1177
1233	1198.26	78761.2	212.2	2.104	0.536533	18.5884	-61.0115
1234	1199.26	78849.8	212	2.096	0.536111	18.6264	-60.922
1235	1200.26	78938.8	213.1	2.233	0.535703	18.6661	-60.8358
1236	1201.26	79022.4	212.3	2.145	0.535302	18.7045	-60.8425
1237	1202.26	79109.5	212.6	2.184	0.534896	18.7453	-60.8387
1238	1203.26	79195.1	212.7	2.192	0.534494	18.7863	-60.8266
1239	1204.26	79280.4	212.6	2.199	0.534096	18.828	-60.8316
1240	1205.26	79365.6	213.4	2.312	0.533711	18.8704	-60.857
1241	1206.26	79446.6	212.4	2.165	0.533313	18.9112	-60.9419
1242	1207.26	79533.3	212.5	2.153	0.532907	18.9555	-60.935
1243	1208.26	79620.4	212.2	2.115	0.532504	19.0012	-60.9121
1244	1209.26	79709.2	213.1	2.275	0.532108	19.0487	-60.9121
1245	1210.26	79791.8	212.7	2.219	0.531718	19.0937	-60.9434
1246	1211.26	79876.6	212.7	2.216	0.531328	19.1406	-60.9947
1247	1212.26	79961.5	213.2	2.302	0.530947	19.1882	-61.0451
1248	1213.26	80043.3	213.2	2.327	0.530575	19.2344	-61.1478
1249	1214.26	80124.4	213.8	2.414	0.530211	19.2802	-61.2929
1250	1215.26	80202.5	213.8	2.436	0.529855	19.3241	-61.4768
1251	1216.26	80279.9	213.8	2.434	0.5295	19.3672	-61.6845
1252	1217.26	80357.5	213.7	2.406	0.529142	19.4098	-61.8961
1253	1218.26	80436.1	213.6	2.398	0.528783	19.4521	-62.094
1254	1219.26	80515	213.7	2.407	0.528423	19.4942	-62.2885
1255	1220.26	80593.6	213.6	2.393	0.528063	19.5356	-62.4805
1256	1221.26	80672.7	213.8	2.411	0.527703	19.5768	-62.6726
1257	1222.26	80751.3	212.8	2.253	0.527328	19.6172	-62.8621
1258	1223.26	80835.5	213.7	2.378	0.526957	19.6602	-62.9677
1259	1224.26	80915.3	213.4	2.349	0.526593	19.7008	-63.1292
1260	1225.26	80996.1	213.2	2.318	0.526223	19.7416	-63.2948
1261	1226.26	81078.1	213.8	2.402	0.525859	19.7826	-63.453
1262	1227.26	81157.3	213.1	2.274	0.525487	19.822	-63.6269
1263	1228.26	81241	212.6	2.213	0.525104	19.8632	-63.7524
1264	1229.26	81327	213.3	2.294	0.524722	19.9057	-63.8295
1265	1230.26	81410.1	213.2	2.305	0.524349	19.947	-63.9377
1266	1231.26	81492.8	213.4	2.337	0.523979	19.988	-64.078
1267	1232.26	81574.5	213.5	2.356	0.523615	20.0282	-64.2346
1268	1233.26	81655.5	213.5	2.348	0.523249	20.0678	-64.409
1269	1234.26	81736.9	212.7	2.255	0.522879	20.107	-64.5772
1270	1235.26	81821.7	214	2.432	0.522513	20.1476	-64.7222
1271	1236.26	81900.4	214.2	2.493	0.522165	20.1847	-64.925
1272	1237.26	81977.2	213.6	2.401	0.521811	20.2203	-65.169
1273	1238.26	82057.1	213.8	2.42	0.521456	20.2563	-65.4012
1274	1239.26	82136.3	213.6	2.404	0.521103	20.291	-65.6244
1275	1240.26	82216.1	214.3	2.53	0.520755	20.325	-65.8667
1276	1241.26	82292	214.7	2.604	0.520421	20.3562	-66.1487
1277	1242.26	82365.8	214.5	2.558	0.520086	20.3853	-66.4699
1278	1243.26	82441	213.7	2.434	0.519738	20.4132	-66.7953
1279	1244.26	82520	213.6	2.412	0.519385	20.4411	-67.0376
1280	1245.26	82599.9	214.8	2.617	0.519042	20.468	-67.3062
1281	1246.26	82673.5	214.4	2.571	0.518706	20.4916	-67.5973
1282	1247.26	82748.4	214	2.488	0.518363	20.5141	-67.9259
1283	1248.26	82826	214.5	2.559	0.51802	20.5353	-68.2146
1284	1249.26	82901.4	214.5	2.562	0.51768	20.5544	-68.5173
1285	1250.26	82976.8	213.9	2.477	0.517331	20.5721	-68.8205
1286	1251.26	83054.8	213.7	2.415	0.516973	20.5889	-69.0934
1287	1252.26	83134.9	213.9	2.448	0.516615	20.6043	-69.3188
1288	1253.26	83214	214	2.481	0.516263	20.6182	-69.5617
1289	1254.26	83292.1	214.3	2.577	0.515919	20.6305	-69.8406
1290	1255.26	83367.3	215.9	2.835	0.515601	20.6407	-70.1713
1291	1256.26	83435.7	214.9	2.715	0.515277	20.6476	-70.6014
1292	1257.26	83507.2	214.6	2.593	0.514942	20.6523	-70.9819
1293	1258.26	83582.1	214.1	2.511	0.514592	20.6552	-71.3212
1294	1259.26	83659.5	213.9	2.456	0.514233	20.6563	-71.6086
1295	1260.26	83738.7	214.1	2.479	0.513872	20.6552	-71.8483
1296	1261.26	83817.2	213.6	2.401	0.513508	20.6524	-72.0803
1297	1262.26	83898.3	213.8	2.473	0.513142	20.648	-72.3094
1298	1263.26	83977.1	215.1	2.665	0.5128	20.6419	-72.5627
1299	1264.26	84050.2	214.4	2.547	0.512449	20.6346	-72.8894
1300	1265.26	84126.9	213.9	2.47	0.512089	20.6241	-73.172
1301	1266.26	84205.9	213.8	2.422	0.51172	20.6115	-73.4125
1302	1267.26	84286.6	213.9	2.43	0.511347	20.5968	-73.6246
1303	1268.26	84367.1	213.5	2.371	0.510968	20.5806	-73.8204
1304	1269.26	84449.6	213.6	2.379	0.510586	20.5621	-73.9883
1305	1270.26	84532	213.6	2.377	0.510201	20.542	-74.1484
1306	1271.26	84614.4	213.1	2.3	0.509812	20.5203	-74.2896
1307	1272.26	84699.7	213.4	2.353	0.50942	20.4966	-74.4179
1308	1273.26	84783.2	213.7	2.38	0.509034	20.4719	-74.5451
1309	1274.26	84865.7	213.2	2.301	0.508639	20.4461	-74.6854
1310	1275.26	84951.1	212.9	2.24	0.508233	20.4179	-74.7882
1311	1276.26	85039	212.8	2.228	0.507821	20.3875	-74.8313
1312	1277.26	85127.4	212.9	2.245	0.507409	20.356	-74.8605
1313	1278.26	85215.2	212.8	2.229	0.506992	20.3239	-74.8885
1314	1279.26	85303.6	212.1	2.095	0.506564	20.2907	-74.8828
1315	1280.26	85397.9	212.6	2.183	0.506134	20.2548	-74.8368
1316	1281.26	85488.4	213	2.228	0.505716	20.2198	-74.8045
1317	1282.26	85577.1	212.3	2.157	0.505291	20.1849	-74.8036
1318	1283.26	85668.8	213.2	2.274	0.504875	20.1481	-74.7839
1319	1284.26	85756	212.6	2.192	0.504456	20.1124	-74.8076
1320	1285.26	85846.4	212.6	2.172	0.504029	20.0744	-74.7985
1321	1286.26	85937.8	211.9	2.075	0.503588	20.0353	-74.7571
1322	1287.26	86033.5	212.2	2.114	0.503143	19.9942	-74.6309
1323	1288.26	86127.5	212.5	2.153	0.502707	19.9537	-74.5302
1324	1289.26	86219.9	212.5	2.159	0.502271	19.9137	-74.4598
1325	1290.26	86312.1	212.1	2.091	0.501829	19.8736	-74.382
1326	1291.26	86407.4	211.9	2.055	0.501379	19.8319	-74.2647
1327	1292.26	86504.5	212.1	2.084	0.500927	19.7896	-74.1171
1328	1293.26	86600.3	211.9	2.058	0.500475	19.7481	-73.9654
1329	1294.26	86697.4	212.1	2.075	0.500021	19.7063	-73.8109
1330	1295.26	86793.8	211.6	2.002	0.499559	19.6653	-73.6423
1331	1296.26	86893.8	211.6	1.995	0.49909	19.6234	-73.4291
1332	1297.26	86994.2	211.7	2.027	0.498627	19.5822	-73.1969
1333	1298.26	87093.1	212.4	2.129	0.498179	19.5425	-73.0051
1334	1299.26	87187.4	212.5	2.164	0.497744	19.505	-72.8875
1335	1300.26	87280.3	212.7	2.179	0.497314	19.468	-72.8169
1336	1301.26	87372.6	211.6	2.03	0.496861	19.4311	-72.7407
1337	1302.26	87471.7	211.6	2.005	0.496395	19.3915	-72.5575
1338	1303.26	87572.2	211.6	1.99	0.495925	19.3523	-72.3245
1339	1304.26	87673.6	210.9	1.887	0.495437	19.314	-72.0601
1340	1305.26	87780.5	210.6	1.842	0.494932	19.2756	-71.6946
1341	1306.26	87890.2	210.6	1.838	0.494426	19.2389	-71.2683
1342	1307.26	88000.3	211.3	1.942	0.493938	19.2053	-70.8558
1343	1308.26	88104.6	211.8	2.033	0.493468	19.1759	-70.5405
1344	1309.26	88204.2	211.3	1.938	0.492997	19.1496	-70.2862
1345	1310.26	88308.9	211.2	1.936	0.492521	19.1238	-70.0014
1346	1311.26	88413.7	211.7	2.026	0.492058	19.0999	-69.7143
1347	1312.26	88514.1	212.6	2.162	0.491616	19.0787	-69.5115
1348	1313.26	88608.1	212.2	2.119	0.491183	19.0596	-69.3949
1349	1314.26	88704.2	212.5	2.156	0.49075	19.0406	-69.3029
1350	1315.26	88798.8	212.1	2.086	0.49031	19.0222	-69.203
1351	1316.26	88896.5	211.5	1.986	0.489854	19.0039	-69.0534
1352	1317.26	88999.3	212	2.056	0.489397	18.9857	-68.8402
1353	1318.26	89098.7	211.6	2.001	0.488942	18.9696	-68.631
1354	1319.26	89200.9	212.2	2.098	0.488494	18.9545	-68.4311
1355	1320.26	89298.5	212	2.09	0.488055	18.9412	-68.2696
1356	1321.26	89396.5	212.8	2.18	0.487626	18.9288	-68.1575
1357	1322.26	89490.6	211.3	1.987	0.487178	18.9175	-68.0494
1358	1323.26	89593.9	212.3	2.119	0.486731	18.9062	-67.8637
1359	1324.26	89690.9	212.5	2.14	0.486302	18.8966	-67.7217
1360	1325.26	89787	211.7	2.035	0.485857	18.8881	-67.6137
1361	1326.26	89888.1	211.9	2.081	0.485411	18.8801	-67.4413
1362	1327.26	89987.1	213.5	2.296	0.485001	18.8733	-67.317
1363	1328.26	90076.9	212.5	2.183	0.484588	18.8676	-67.3151
1364	1329.26	90171.5	212.1	2.1	0.484156	18.8615	-67.2868
1365	1330.26	90269.8	212.2	2.108	0.483722	18.8557	-67.1736
1366	1331.26	90367.9	212.6	2.167	0.483296	18.8507	-67.0602
1367	1332.26	90463.4	212.3	2.133	0.482869	18.8465	-66.9865
1368	1333.26	90560.5	212.5	2.162	0.482446	18.8429	-66.9032
1369	1334.26	90656.4	213	2.254	0.482035	18.8397	-66.8444
1370	1335.26	90748.4	212.9	2.231	0.481626	18.8369	-66.8545
1371	1336.26	90841.5	212	2.103	0.4812	18.8339	-66.8573
1372	1337.26	90940.3	212.6	2.176	0.480775	18.8312	-66.7385
1373	1338.26	91035.9	212.7	2.191	0.480357	18.8292	-66.6858
1374	1339.26	91130.9	212.4	2.142	0.479934	18.8275	-66.6454
1375	1340.26	91228.2	212	2.09	0.479503	18.8263	-66.5628
1376	1341.26	91328	212.4	2.159	0.479078	18.826	-66.445
1377	1342.26	91424.7	213.3	2.281	0.478665	18.8264	-66.3855
1378	1343.26	91516.3	212.2	2.129	0.478249	18.8271	-66.3754
1379	1344.26	91614.5	211.9	2.067	0.477815	18.8281	-66.3083
1380	1345.26	91715.7	212	2.068	0.477373	18.8302	-66.1674
1381	1346.26	91817	211.4	1.996	0.476928	18.8337	-65.9943
1382	1347.26	91922.1	212.2	2.1	0.476488	18.8392	-65.7963
1383	1348.26	92022	212.5	2.156	0.476065	18.846	-65.6636
1384	1349.26	92119.4	212.6	2.183	0.475648	18.8537	-65.5946
1385	1350.26	92215.8	212.4	2.152	0.475231	18.862	-65.5473
1386	1351.26	92313.5	212.5	2.16	0.474813	18.8711	-65.4939
1387	1352.26	92411	212.4	2.146	0.474394	18.8808	-65.4343
1388	1353.26	92509.3	212.4	2.15	0.473972	18.8914	-65.3694
1389	1354.26	92607.4	211.9	2.057	0.473541	18.9029	-65.2816
1390	1355.26	92710.1	211.6	1.999	0.473098	18.9163	-65.1356
1391	1356.26	92815.8	211.6	2.006	0.472653	18.9321	-64.9337
1392	1357.26	92921.3	212	2.08	0.47222	18.9501	-64.7345
1393	1358.26	93023.1	213.1	2.237	0.471805	18.9694	-64.616
1394	1359.26	93117.9	212.2	2.122	0.471395	18.9884	-64.5865
1395	1360.26	93217.8	212.2	2.114	0.470976	19.0093	-64.5361
1396	1361.26	93318.2	212.6	2.177	0.470564	19.0314	-64.466
1397	1362.26	93415.9	212.6	2.188	0.470161	19.0538	-64.4333
1398	1363.26	93513.1	213.5	2.357	0.469764	19.0767	-64.4532
1399	1364.26	93603.4	212.1	2.083	0.469359	19.0983	-64.4823
1400	1365.26	93705.7	211.9	2.052	0.468938	19.1234	-64.4419
1401	1366.26	93809.6	212.9	2.237	0.46853	19.1501	-64.3602
1402	1367.26	93905	213.3	2.303	0.468138	19.1756	-64.3667
1403	1368.26	93997.8	212.3	2.136	0.467738	19.2007	-64.4096
1404	1369.26	94097.8	212.6	2.168	0.467327	19.2283	-64.4094
1405	1370.26	94196.5	211.7	2.034	0.466906	19.2564	-64.3537
1406	1371.26	94301.8	211.8	2.03	0.466478	19.2879	-64.2349
1407	1372.26	94407.4	212.6	2.19	0.466067	19.3215	-64.1185
1408	1373.26	94505.4	213	2.267	0.465677	19.354	-64.1018
1409	1374.26	94600.1	213.6	2.379	0.465302	19.3859	-64.1864
1410	1375.26	94690.5	213.4	2.337	0.464931	19.4161	-64.3285
1411	1376.26	94782.5	213.2	2.326	0.464556	19.4464	-64.4838
1412	1377.26	94875	214.1	2.45	0.464193	19.4763	-64.6381
1413	1378.26	94962.9	212.9	2.256	0.463816	19.504	-64.8335
1414	1379.26	95058.5	213	2.262	0.46343	19.5334	-64.949
1415	1380.26	95153.9	212.4	2.147	0.463033	19.5627	-65.0208
1416	1381.26	95254.5	213.4	2.35	0.462652	19.5939	-65.031
1417	1382.26	95346.5	213.9	2.423	0.462287	19.6226	-65.1723
1418	1383.26	95435.7	213	2.269	0.461912	19.6495	-65.3874
1419	1384.26	95531.1	212.4	2.159	0.461515	19.6777	-65.4878
1420	1385.26	95631.5	212.4	2.145	0.461109	19.7076	-65.491
1421	1386.26	95732.6	212.3	2.15	0.460705	19.7386	-65.4703
1422	1387.26	95833.5	213.1	2.265	0.460314	19.7704	-65.4604
1423	1388.26	95929.4	213.1	2.274	0.459932	19.8011	-65.5452
1424	1389.26	96025.1	212.7	2.222	0.459547	19.8316	-65.6455
1425	1390.26	96123	213.1	2.279	0.459163	19.8629	-65.7261
1426	1391.26	96218.5	213.1	2.291	0.458786	19.8933	-65.83
1427	1392.26	96313.7	213.7	2.395	0.458414	19.9232	-65.9719
1428	1393.26	96404.8	212.9	2.241	0.45804	19.9514	-66.1216
1429	1394.26	96502.2	213.3	2.317	0.45766	19.981	-66.2654
1430	1395.26	96596.5	212.5	2.175	0.457273	20.0093	-66.368
1431	1396.26	96697.1	212.7	2.205	0.456879	20.0394	-66.4318
1432	1397.26	96796.3	213	2.265	0.456494	20.0694	-66.4855
1433	1398.26	96893.1	213.6	2.344	0.456122	20.0986	-66.5972
1434	1399.26	96986.6	212.6	2.205	0.455739	20.1265	-66.7356
1435	1400.26	97086.1	212.5	2.201	0.455344	20.1559	-66.815
1436	1401.26	97185.9	213.7	2.365	0.454971	20.1854	-66.8853
1437	1402.26	97278.8	213.2	2.308	0.454602	20.2127	-67.042
1438	1403.26	97374.1	212.9	2.264	0.454223	20.2399	-67.2051
1439	1404.26	97471.3	213.4	2.352	0.453853	20.2671	-67.3366
1440	1405.26	97565	214.4	2.539	0.453501	20.2926	-67.5284
1441	1406.26	97651.9	212.8	2.235	0.453131	20.315	-67.8071
1442	1407.26	97750.6	213.1	2.284	0.452752	20.3392	-67.9405
1443	1408.26	97847.3	213.2	2.322	0.452378	20.3623	-68.0683
1444	1409.26	97942.5	214.3	2.48	0.45202	20.3844	-68.23
1445	1410.26	98031.7	213.5	2.375	0.451664	20.4037	-68.5079
1446	1411.26	98124.9	213.3	2.349	0.451298	20.4224	-68.7318
1447	1412.26	98219.3	214.2	2.489	0.450938	20.4399	-68.9448
1448	1413.26	98308.4	213.4	2.355	0.450582	20.455	-69.1801
1449	1414.26	98402.6	214.2	2.506	0.450226	20.4693	-69.4465
1450	1415.26	98491.2	214.1	2.501	0.449878	20.481	-69.7183
1451	1416.26	98580.1	214	2.45	0.449525	20.4907	-70.0152
1452	1417.26	98670.9	213	2.297	0.449152	20.4987	-70.2752
1453	1418.26	98767.8	213.7	2.398	0.448784	20.5054	-70.4527
1454	1419.26	98860.7	214	2.465	0.448422	20.5105	-70.6612
1455	1420.26	98951.2	212.5	2.174	0.448036	20.5137	-70.9019
1456	1421.26	99053.9	213.2	2.299	0.447648	20.516	-70.97
1457	1422.26	99151	213	2.273	0.447262	20.5174	-71.083
1458	1423.26	99249.4	213.1	2.288	0.446876	20.5179	-71.1949
1459	1424.26	99347.2	213.1	2.291	0.446492	20.5174	-71.3155
1460	1425.26	99445	213.2	2.319	0.44611	20.5159	-71.4391
1461	1426.26	99541.6	213.6	2.38	0.445737	20.5131	-71.5855
1462	1427.26	99635.9	213.4	2.346	0.445363	20.5089	-71.7829
1463	1428.26	99731.6	213.4	2.331	0.444983	20.503	-71.9548
1464	1429.26	99828	213.1	2.283	0.444598	20.4955	-72.1068
1465	1430.26	99926.5	213	2.267	0.444207	20.4865	-72.2234
1466	1431.26	100026	212.9	2.239	0.443812	20.4763	-72.3162
1467	1432.26	100126	212.7	2.207	0.443412	20.465	-72.3837
1468	1433.26	100229	212.7	2.222	0.44301	20.4527	-72.4231
1469	1434.26	100330	213.4	2.331	0.442621	20.4398	-72.474
1470	1435.26	100427	213.6	2.371	0.442242	20.4264	-72.6097
1471	1436.26	100522	213	2.291	0.44186	20.4116	-72.7744
1472	1437.26	100621	213.6	2.38	0.441479	20.3945	-72.9175
1473	1438.26	100716	214	2.473	0.44111	20.3763	-73.099
1474	1439.26	100808	213.9	2.444	0.440744	20.3567	-73.3293
1475	1440.26	100901	213.9	2.459	0.440378	20.3344	-73.5767
1476	1441.26	100993	213.9	2.463	0.440011	20.3098	-73.8194
1477	1442.26	101086	214	2.467	0.439645	20.2826	-74.0649
1478	1443.26	101178	213.7	2.421	0.439272	20.2528	-74.305
1479	1444.26	101272	213.9	2.447	0.438899	20.2199	-74.5233
1480	1445.26	101365	214.3	2.522	0.438533	20.1847	-74.7492
1481	1446.26	101455	214.2	2.52	0.438169	20.1478	-75.0157
1482	1447.26	101546	214.1	2.492	0.437802	20.1076	-75.2919
1483	1448.26	101637	214	2.487	0.437432	20.0639	-75.5449
1484	1449.26	101729	214.3	2.527	0.437063	20.017	-75.7888
1485	1450.26	101820	214.1	2.515	0.4367	19.9677	-76.0534
1486	1451.26	101911	215.3	2.728	0.436342	19.9148	-76.3621
1487	1452.26	101995	214.3	2.563	0.435986	19.8626	-76.6765
1488	1453.26	102084	214.3	2.551	0.435618	19.8034	-76.9992
1489	1454.26	102174	214.8	2.635	0.435256	19.7402	-77.2832
1490	1455.26	102262	215	2.698	0.434902	19.6753	-77.6014
1491	1456.26	102347	215.1	2.668	0.434545	19.6078	-77.9626
1492	1457.26	102433	213.5	2.396	0.434162	19.535	-78.3048
1493	1458.26	102529	213.1	2.314	0.433749	19.4503	-78.4461
1494	1459.26	102629	214.1	2.479	0.433347	19.3595	-78.496
1495	1460.26	102722	214.4	2.534	0.432959	19.2717	-78.6504
1496	1461.26	102813	213.6	2.406	0.432566	19.1825	-78.8353
1497	1462.26	102909	214.3	2.526	0.432171	19.0848	-79.0022
1498	1463.26	103001	214.4	2.526	0.431778	18.9881	-79.1716
1499	1464.26	103093	212.6	2.227	0.431356	18.888	-79.3043
1500	1465.26	103197	213.1	2.283	0.430915	18.7709	-79.3006
1501	1466.26	103298	213	2.275	0.430479	18.6539	-79.2339
1502	1467.26	103400	213.7	2.396	0.43005	18.5339	-79.2016
1503	1468.26	103497	213.1	2.288	0.429618	18.4171	-79.1934
1504	1469.26	103599	212.9	2.247	0.429178	18.292	-79.157
1505	1470.26	103703	214.1	2.475	0.428747	18.1615	-79.1103
1506	1471.26	103797	212.9	2.267	0.428314	18.0402	-79.1009
1507	1472.26	103900	213.1	2.278	0.427864	17.9047	-79.0531
1508	1473.26	104003	212.9	2.252	0.427412	17.767	-78.9443
1509	1474.26	104106	213.1	2.29	0.426958	17.625	-78.8229
1510	1475.26	104209	213	2.248	0.426499	17.4827	-78.6962
1511	1476.26	104313	212.3	2.128	0.426023	17.3354	-78.5248
1512	1477.26	104423	212.2	2.116	0.425532	17.1775	-78.2518
1513	1478.26	104534	212.7	2.194	0.425049	17.0171	-77.9254
1514	1479.26	104642	213.2	2.304	0.424587	16.8609	-77.6758
1515	1480.26	104744	213.6	2.368	0.424139	16.7098	-77.54
1516	1481.26	104843	213.4	2.35	0.423691	16.5598	-77.4654
1517	1482.26	104944	213.5	2.381	0.423244	16.4055	-77.372
1518	1483.26	105043	214.1	2.474	0.422808	16.25	-77.2977
1519	1484.26	105139	213.6	2.413	0.42237	16.0968	-77.3016
1520	1485.26	105237	214	2.474	0.421931	15.9361	-77.249
1521	1486.26	105333	214.4	2.543	0.421502	15.7756	-77.2366
1522	1487.26	105426	214.2	2.517	0.421075	15.6155	-77.2765
1523	1488.26	105520	214.1	2.499	0.420641	15.4496	-77.2983
1524	1489.26	105615	214.2	2.527	0.420206	15.2783	-77.2993
1525	1490.26	105710	214.5	2.585	0.419774	15.1047	-77.3098
1526	1491.26	105802	214.1	2.522	0.419343	14.9308	-77.3288
1527	1492.26	105896	215.1	2.685	0.418918	14.7479	-77.3675
1528	1493.26	105985	214.5	2.6	0.418492	14.5718	-77.4286
1529	1494.26	106077	214.5	2.588	0.418057	14.3852	-77.4803
1530	1495.26	106170	214.6	2.594	0.417619	14.193	-77.4928
1531	1496.26	106262	214	2.475	0.417166	13.9966	-77.4882
1532	1497.26	106359	213.9	2.453	0.416703	13.7861	-77.3939
1533	1498.26	106457	214.5	2.577	0.416247	13.5693	-77.2623
1534	1499.26	106550	214	2.498	0.415787	13.3585	-77.1923
1535	1500.26	106646	214.9	2.644	0.415338	13.1364	-77.077
1536	1501.26	106737	214.4	2.558	0.414885	12.9219	-77.0639
1537	1502.26	106831	213.8	2.455	0.414412	12.6954	-76.9754
1538	1503.26	106930	214.4	2.523	0.413934	12.4547	-76.78
1539	1504.26	107025	213.9	2.474	0.413457	12.2162	-76.6111
1540	1505.26	107123	214.2	2.506	0.412975	11.9684	-76.4129
1541	1506.26	107220	214.1	2.515	0.412498	11.7192	-76.2123
1542	1507.26	107316	214.9	2.667	0.412028	11.4663	-76.04
1543	1508.26	107407	214.6	2.608	0.411561	11.2231	-75.9197
1544	1509.26	107500	213.9	2.467	0.411078	10.9696	-75.7764
1545	1510.26	107599	214.7	2.611	0.410593	10.6965	-75.5646
1546	1511.26	107692	214.6	2.588	0.410115	10.4337	-75.3708
1547	1512.26	107786	213.6	2.407	0.409608	10.1637	-75.1599
1548	1513.26	107888	213.2	2.316	0.409069	9.8686	-74.7875
1549	1514.26	107993	213.2	2.32	0.408524	9.55766	-74.2774
1550	1515.26	108099	214	2.458	0.407989	9.24354	-73.7628
1551	1516.26	108199	213.4	2.343	0.407451	8.94342	-73.3058
1552	1517.26	108303	213.1	2.285	0.406892	8.62472	-72.7829
1553	1518.26	108411	213	2.265	0.406323	8.29429	-72.1637
1554	1519.26	108519	213.2	2.282	0.405749	7.95773	-71.4967
1555	1520.26	108627	212.4	2.174	0.405158	7.62065	-70.8102
1556	1521.26	108741	212.8	2.21	0.404555	7.26421	-69.9822
1557	1522.26	108853	212.1	2.095	0.403935	6.91136	-69.1562
1558	1523.26	108971	212.6	2.169	0.403316	6.5373	-68.1747
1559	1524.26	109085	212.7	2.206	0.402709	6.17475	-67.2599
1560	1525.26	109198	213.3	2.307	0.40211	5.81644	-66.3993
1561	1526.26	109306	212	2.064	0.401486	5.47205	-65.5725
1562	1527.26	109426	211.5	1.987	0.400819	5.08562	-64.5082
1563	1528.26	109552	212.1	2.07	0.400153	4.68416	-63.2377
1564	1529.26	109673	211.4	1.976	0.399476	4.29975	-62.0503
1565	1530.26	109799	212.4	2.129	0.398812	3.89791	-60.7446
1566	1531.26	109917	211.6	2.002	0.398144	3.52598	-59.5731
1567	1532.26	110043	211.5	1.997	0.397457	3.1314	-58.2617
1568	1533.26	110169	212.1	2.081	0.396784	2.73787	-56.8979
1569	1534.26	110290	212.3	2.127	0.396132	2.36207	-55.6549
1570	1535.26	110408	212.5	2.166	0.395488	1.99555	-54.4833
1571	1536.26	110525	212.2	2.119	0.394839	1.63646	-53.3458
1572	1537.26	110645	212.1	2.09	0.394176	1.27024	-52.1365
1573	1538.26	110766	212.2	2.096	0.393511	0.900759	-50.8533
1574	1539.26	110887	211.9	2.062	0.39284	0.53457	-49.5567
1575	1540.26	111011	212.6	2.195	0.392186	0.164812	-48.2236
1576	1541.26	111127	213.2	2.287	0.391562	-0.18052	-47.0434
1577	1542.26	111239	213.3	2.32	0.390953	-0.510929	-46.0091
1578	1543.26	111349	212.4	2.161	0.390317	-0.836256	-45.0231
1579	1544.26	111467	212.8	2.208	0.389675	-1.18438	-43.7917
1580	1545.26	111584	212.4	2.152	0.389024	-1.52307	-42.589
1581	1546.26	111703	212.7	2.206	0.388376	-1.86811	-41.3129
1582	1547.26	111820	213.2	2.286	0.387745	-2.20238	-40.0907
1583	1548.26	111933	212.7	2.214	0.38711	-2.52296	-38.9626
1584	1549.26	112049	212.2	2.12	0.386447	-2.85186	-37.7319
1585	1550.26	112171	213.1	2.26	0.385805	-3.1916	-36.3407
1586	1551.26	112286	212.7	2.206	0.385162	-3.50699	-35.1261
1587	1552.26	112404	212.6	2.181	0.384509	-3.82698	-33.8413
1588	1553.26	112523	212.6	2.199	0.383857	-4.1469	-32.5033
1589	1554.26	112642	213.2	2.301	0.383225	-4.46019	-31.1758
1590	1555.26	112755	212.9	2.241	0.382593	-4.75615	-30.0003
1591	1556.26	112872	212.6	2.201	0.381946	-5.0562	-28.7278
1592	1557.26	112991	212.9	2.24	0.381303	-5.35734	-27.3847
1593	1558.26	113108	213	2.264	0.38067	-5.64879	-26.0828
1594	1559.26	113224	213.3	2.313	0.380045	-5.93294	-24.8166
1595	1560.26	113337	213.4	2.345	0.379432	-6.20698	-23.6122
1596	1561.26	113450	213.7	2.389	0.378827	-6.4736	-22.4593
1597	1562.26	113560	213	2.28	0.378208	-6.73174	-21.3486
1598	1563.26	113676	213.6	2.37	0.377597	-6.99792	-20.0967
1599	1564.26	113788	213.5	2.362	0.376992	-7.24985	-18.9411
1600	1565.26	113900	213.5	2.363	0.376384	-7.49854	-17.7815
1601	1566.26	114013	213.4	2.331	0.375772	-7.74285	-16.6057
1602	1567.26	114127	212.9	2.256	0.375145	-7.98589	-15.3735
1603	1568.26	114245	213.3	2.326	0.374524	-8.23129	-14.0242
1604	1569.26	114360	213.5	2.352	0.373915	-8.46312	-12.7711
1605	1570.26	114474	213.3	2.311	0.373302	-8.68643	-11.5494
1606	1571.26	114590	212.6	2.202	0.37267	-8.9077	-10.2541
1607	1572.26	114711	213.8	2.395	0.372049	-9.13257	-8.83495
1608	1573.26	114824	212.6	2.221	0.371426	-9.33254	-7.58007
1609	1574.26	114945	213.1	2.282	0.370801	-9.54067	-6.15002
1610	1575.26	115063	213.9	2.434	0.370209	-9.73461	-4.80712
1611	1576.26	115174	213.4	2.356	0.369615	-9.90951	-3.66399
1612	1577.26	115289	213.3	2.325	0.369011	-10.0834	-2.43057
1613	1578.26	115405	213.3	2.303	0.368401	-10.2521	-1.13638
1614	1579.26	115523	212.6	2.198	0.367774	-10.4139	0.213634
1615	1580.26	115647	212.5	2.177	0.367135	-10.5736	1.72099
1616	1581.26	115772	213.2	2.276	0.366517	-10.7222	3.27373
1617	1582.26	115892	212.7	2.218	0.365897	-10.853	4.68067
1618	1583.26	116015	212.8	2.236	0.36528	-10.9761	6.15545
1619	1584.26	116138	213.5	2.347	0.364686	-11.0866	7.60542
1620	1585.26	116254	213.4	2.346	0.364106	-11.1813	8.86611
1621	1586.26	116371	213.6	2.391	0.363535	-11.2648	10.1072
1622	1587.26	116486	213.7	2.4	0.362972	-11.3372	11.2833
1623	1588.26	116601	213.6	2.401	0.362414	-11.3997	12.4374
1624	1589.26	116716	214.1	2.47	0.361865	-11.4526	13.5667
1625	1590.26	116828	213.6	2.4	0.361316	-11.4947	14.6313
1626	1591.26	116943	214.1	2.485	0.360779	-11.5283	15.7548
1627	1592.26	117055	214.7	2.616	0.360266	-11.5513	16.747
1628	1593.26	117161	213.9	2.449	0.359741	-11.5646	17.5845
1629	1594.26	117275	213.7	2.418	0.359202	-11.5695	18.6157
1630	1595.26	117390	214.5	2.562	0.358689	-11.5641	19.6689
1631	1596.26	117498	214.6	2.597	0.358194	-11.5498	20.5483
1632	1597.26	117606	214.8	2.67	0.357714	-11.5273	21.334
1633	1598.26	117711	215.9	2.914	0.357254	-11.4981	21.9964
1634	1599.26	117807	214.6	2.635	0.356794	-11.4655	22.5381
1635	1600.26	117913	215.5	2.819	0.356335	-11.4231	23.1535
1636	1601.26	118013	215.4	2.804	0.355888	-11.3772	23.698
1637	1602.26	118113	215.6	2.849	0.355445	-11.3252	24.1963
1638	1603.26	118212	215.3	2.794	0.355006	-11.2685	24.6715
1639	1604.26	118312	216	2.938	0.354576	-11.2049	25.1294
1640	1605.26	118408	216	2.947	0.354155	-11.1394	25.5047
1641	1606.26	118504	215.9	2.918	0.353735	-11.0694	25.8423
1642	1607.26	118601	215.7	2.881	0.353313	-10.994	26.1935
1643	1608.26	118699	215.8	2.905	0.352893	-10.9125	26.5613
1644	1609.26	118797	216	2.918	0.352476	-10.8265	26.9099
1645	1610.26	118894	215.1	2.744	0.352045	-10.7357	27.2794
1646	1611.26	118998	215.6	2.83	0.351613	-10.6327	27.7428
1647	1612.26	119098	214.9	2.688	0.35118	-10.526	28.2077
1648	1613.26	119204	215.7	2.87	0.350754	-10.4062	28.6956
1649	1614.26	119303	215.5	2.835	0.350343	-10.287	29.0961
1650	1615.26	119404	216.3	3.023	0.349943	-10.1601	29.4145
1651	1616.26	119499	215.5	2.867	0.349546	-10.0356	29.6685
1652	1617.26	119598	216.9	3.114	0.349162	-9.8989	29.8849
1653	1618.26	119690	215.2	2.804	0.348763	-9.76835	30.0677
1654	1619.26	119793	215.4	2.788	0.348349	-9.61736	30.385
1655	1620.26	119896	214.8	2.675	0.347932	-9.45816	30.7898
1656	1621.26	120003	215.8	2.887	0.347526	-9.28368	31.2131
1657	1622.26	120103	215.4	2.806	0.34713	-9.11443	31.5355
1658	1623.26	120205	215.5	2.833	0.346736	-8.93291	31.8303
1659	1624.26	120307	215.7	2.872	0.346348	-8.74576	32.1046
1660	1625.26	120408	215.6	2.847	0.345967	-8.55394	32.3419
1661	1626.26	120509	216.3	3.037	0.345598	-8.35353	32.5223
1662	1627.26	120605	216.2	2.992	0.345237	-8.15967	32.6141
1663	1628.26	120701	216	2.956	0.344875	-7.95733	32.6778
1664	1629.26	120799	215.9	2.932	0.344513	-7.74669	32.7601
1665	1630.26	120898	216.3	3.02	0.344159	-7.52827	32.8303
1666	1631.26	120995	216.4	3.041	0.343813	-7.31049	32.8428
1667	1632.26	121090	216.2	3	0.343466	-7.08894	32.82
1668	1633.26	121187	216.1	2.99	0.34312	-6.85887	32.8058
1669	1634.26	121285	216.3	3.027	0.342779	-6.62238	32.786
1670	1635.26	121381	216.3	3.039	0.342443	-6.38323	32.7303
1671	1636.26	121477	216.5	3.087	0.342114	-6.13972	32.6394
1672	1637.26	121572	216.7	3.127	0.341792	-5.89509	32.4995
1673	1638.26	121666	216.6	3.117	0.341473	-5.64909	32.3171
1674	1639.26	121760	216.5	3.08	0.341152	-5.39788	32.1267
1675	1640.26	121855	216.3	3.036	0.34083	-5.13899	31.9538
1676	1641.26	121951	216.5	3.099	0.340514	-4.87101	31.7982
1677	1642.26	122046	216.9	3.151	0.340205	-4.60353	31.5806
1678	1643.26	122139	216.1	3.012	0.339892	-4.33608	31.3184
1679	1644.26	122237	216.7	3.131	0.339584	-4.05143	31.1255
1680	1645.26	122331	216.9	3.194	0.339288	-3.77279	30.8407
1681	1646.26	122423	217.2	3.268	0.338998	-3.49569	30.4819
1682	1647.26	122514	216.7	3.159	0.338707	-3.22143	30.1047
1683	1648.26	122607	216.6	3.099	0.33841	-2.93404	29.7477
1684	1649.26	122702	215.9	2.945	0.338106	-2.63668	29.4586
1685	1650.26	122803	216.4	3.074	0.337807	-2.31844	29.1944
1686	1651.26	122899	217	3.224	0.337524	-2.00834	28.8647
1687	1652.26	122991	217.2	3.261	0.337251	-1.70861	28.4316
1688	1653.26	123082	216.7	3.168	0.336975	-1.40907	27.9545
1689	1654.26	123176	216.7	3.122	0.336695	-1.09727	27.505
1690	1655.26	123271	215.9	2.988	0.336408	-0.77675	27.099
1691	1656.26	123370	217	3.192	0.336134	-0.436805	26.7292
1692	1657.26	123463	216.9	3.209	0.335869	-0.114352	26.2463
1693	1658.26	123556	217	3.236	0.335608	0.209857	25.7102
1694	1659.26	123648	217.5	3.274	0.335349	0.534643	25.1382
1695	1660.26	123739	215.2	2.835	0.33507	0.858686	24.5813
1696	1661.26	123845	216.5	3.042	0.334793	1.23801	24.2685
1697	1662.26	123943	216.3	3.064	0.334529	1.59763	23.8055
1698	1663.26	124040	216.9	3.188	0.334274	1.95941	23.2897
1699	1664.26	124134	216.9	3.192	0.334025	2.31095	22.6841
1700	1665.26	124228	216.6	3.143	0.333778	2.66536	22.0607
1701	1666.26	124323	217.1	3.247	0.333537	3.02862	21.412
1702	1667.26	124416	217.6	3.375	0.333303	3.38312	20.6991
1703	1668.26	124505	216.7	3.141	0.333066	3.72654	19.9897
1704	1669.26	124600	216.4	3.059	0.332821	4.09829	19.3019
1705	1670.26	124698	216.8	3.168	0.332582	4.48365	18.6428
1706	1671.26	124793	216.9	3.2	0.332351	4.85917	17.9477
1707	1672.26	124887	217	3.235	0.332124	5.23393	17.1958
1708	1673.26	124980	217.2	3.253	0.331902	5.60708	16.4097
1709	1674.26	125073	216.7	3.164	0.331677	5.98052	15.6107
1710	1675.26	125168	216.8	3.156	0.331452	6.36702	14.8314
1711	1676.26	125264	216.8	3.162	0.33123	6.75734	14.0498
1712	1677.26	125359	216.2	3.025	0.331003	7.14978	13.2622
1713	1678.26	125459	217	3.224	0.330786	7.56351	12.5124
1714	1679.26	125553	216.7	3.144	0.330572	7.95455	11.6522
1715	1680.26	125649	216.7	3.135	0.330359	8.35812	10.8087
1716	1681.26	125746	216.6	3.126	0.330147	8.76542	9.95669
1717	1682.26	125843	216.9	3.189	0.329941	9.17664	9.08389
1718	1683.26	125938	216.9	3.157	0.329735	9.5821	8.17065
1719	1684.26	126034	216	3.002	0.329527	9.99386	7.28146
1720	1685.26	126135	216.5	3.069	0.32932	10.43	6.41683
1721	1686.26	126234	216.6	3.129	0.32912	10.8596	5.51662
1722	1687.26	126331	217.2	3.236	0.328927	11.2835	4.54467
1723	1688.26	126425	216.5	3.103	0.328734	11.6953	3.55708
1724	1689.26	126523	216.3	3.046	0.32854	12.1266	2.57502
1725	1690.26	126623	216.6	3.105	0.328347	12.5683	1.59526
1726	1691.26	126721	216.4	3.068	0.328158	13.004	0.607238
1727	1692.26	126820	216.3	3.029	0.327968	13.4473	-0.39313
1728	1693.26	126921	216.2	3.017	0.327781	13.8988	-1.39515
1729	1694.26	127022	216.3	3.034	0.327597	14.3546	-2.4119
1730	1695.26	127123	216.6	3.123	0.327421	14.81	-3.47473
1731	1696.26	127220	217.3	3.257	0.32725	15.2543	-4.6113
1732	1697.26	127314	216.2	3.012	0.327077	15.6813	-5.72213
1733	1698.26	127416	215.9	2.943	0.326899	16.1443	-6.8324
1734	1699.26	127520	216.3	3.035	0.326727	16.6204	-7.92991
1735	1700.26	127621	216.5	3.085	0.326561	17.0842	-9.06229
1736	1701.26	127720	216.5	3.094	0.326399	17.5418	-10.2407
1737	1702.26	127819	216.8	3.151	0.326241	17.999	-11.4654
1738	1703.26	127916	216.8	3.176	0.32609	18.4484	-12.7226
1739	1704.26	128013	217.7	3.421	0.325946	18.894	-14.0852
1740	1705.26	128102	217.5	3.349	0.325807	19.3065	-15.447
1741	1706.26	128194	217.1	3.26	0.325664	19.7264	-16.8442
1742	1707.26	128288	217.1	3.28	0.325523	20.1563	-18.242
1743	1708.26	128382	217.7	3.39	0.325388	20.5821	-19.6671
1744	1709.26	128472	217.3	3.374	0.325255	20.992	-21.1273
1745	1710.26	128564	219.3	3.844	0.325135	21.4013	-22.6577
1746	1711.26	128644	217.9	3.53	0.325014	21.757	-24.2704
1747	1712.26	128731	217.9	3.496	0.324889	22.1401	-25.851
1748	1713.26	128819	218.3	3.603	0.324766	22.5232	-27.4496
1749	1714.26	128904	218	3.527	0.324644	22.891	-29.0195
1750	1715.26	128992	218	3.511	0.32452	23.2629	-30.6198
1751	1716.26	129079	217.9	3.498	0.324397	23.6324	-32.2123
1752	1717.26	129168	217.9	3.501	0.324274	23.9991	-33.8098
1753	1718.26	129256	217.8	3.469	0.324151	24.3613	-35.4122
1754	1719.26	129345	218.3	3.587	0.32403	24.7217	-37.0423
1755	1720.26	129431	217.9	3.488	0.323908	25.0655	-38.6626
1756	1721.26	129519	217.2	3.328	0.323783	25.4144	-40.2493
1757	1722.26	129612	218	3.507	0.323659	25.7752	-41.9009
1758	1723.26	129700	217.9	3.5	0.323538	26.1127	-43.5179
1759	1724.26	129788	217.8	3.504	0.323418	26.4456	-45.175
1760	1725.26	129877	218.8	3.703	0.323303	26.7725	-46.8716
1761	1726.26	129960	217.5	3.387	0.323181	27.0765	-48.5741
1762	1727.26	130051	218.1	3.532	0.323058	27.402	-50.2203
1763	1728.26	130139	217.9	3.493	0.322937	27.7078	-51.8937
1764	1729.26	130228	217.7	3.45	0.322814	28.0109	-53.564
1765	1730.26	130317	218.1	3.549	0.322692	28.3114	-55.2716
1766	1731.26	130405	217.9	3.492	0.322571	28.597	-56.9496
1767	1732.26	130494	218	3.511	0.322448	28.8805	-58.6607
1768	1733.26	130582	217.6	3.445	0.322322	29.1556	-60.3477
1769	1734.26	130672	218.1	3.541	0.322199	29.4289	-62.0491
1770	1735.26	130760	217.8	3.469	0.322075	29.6876	-63.7687
1771	1736.26	130849	218.3	3.585	0.32195	29.9434	-65.4931
1772	1737.26	130936	217.7	3.472	0.321824	30.1829	-67.1948
1773	1738.26	131025	218.1	3.529	0.321697	30.4222	-68.9304
1774	1739.26	131113	218	3.535	0.321569	30.6496	-70.6506
1775	1740.26	131201	217.7	3.445	0.321437	30.8684	-72.3497
1776	1741.26	131292	217.7	3.435	0.321304	31.0846	-74.0563
1777	1742.26	131382	217.7	3.437	0.321168	31.2927	-75.7502
1778	1743.26	131473	217.6	3.383	0.321029	31.4921	-77.4315
1779	1744.26	131565	216.9	3.218	0.320881	31.6857	-79.0756
1780	1745.26	131662	217.3	3.313	0.320733	31.88	-80.676
1781	1746.26	131756	216.9	3.19	0.320579	32.0601	-82.2885
1782	1747.26	131854	216.1	2.987	0.320416	32.2376	-83.8238
1783	1748.26	131958	216.4	3.052	0.32025	32.418	-85.3276
1784	1749.26	132060	215.9	2.943	0.320078	32.5856	-86.8152
1785	1750.26	132167	216.3	3.001	0.319907	32.7499	-88.2745
1786	1751.26	132271	215.8	2.9	0.319728	32.9018	-89.7442
1787	1752.26	132379	215.4	2.795	0.319539	33.0495	-91.1406
1788	1753.26	132490	214.8	2.675	0.31934	33.1936	-92.4606
1789	1754.26	132608	214.8	2.665	0.319139	33.335	-93.7446
1790	1755.26	132725	215.6	2.802	0.318941	33.4679	-95.066
1791	1756.26	132837	214.6	2.628	0.318733	33.5851	-96.3482
1792	1757.26	132956	213.7	2.414	0.318506	33.7006	-97.5537
1793	1758.26	133086	213.9	2.429	0.318272	33.8161	-98.6404
1794	1759.26	133216	213.1	2.295	0.318024	33.9229	-99.6738
1795	1760.26	133353	212.7	2.209	0.317766	34.0282	-100.623
1796	1761.26	133495	213.3	2.314	0.317515	34.1289	-101.543
1797	1762.26	133631	213.1	2.272	0.31726	34.2176	-102.495
1798	1763.26	133770	212.4	2.157	0.316989	34.2994	-103.412
1799	1764.26	133916	212.1	2.099	0.316707	34.3773	-104.201
1800	1765.26	134067	212.1	2.08	0.316421	34.4505	-104.952
1801	1766.26	134219	211.9	2.059	0.316131	34.5168	-105.668
1802	1767.26	134372	212.5	2.155	0.315851	34.577	-106.389
1803	1768.26	134519	212.1	2.074	0.315561	34.6264	-107.176
1804	1769.26	134672	210.9	1.905	0.315246	34.6699	-107.859
1805	1770.26	134839	212.2	2.086	0.314947	34.7103	-108.402
1806	1771.26	134991	211.9	2.058	0.314646	34.74	-109.09
1807	1772.26	135145	211.3	1.945	0.31433	34.7624	-109.735
1808	1773.26	135309	211.2	1.939	0.314008	34.7779	-110.273
1809	1774.26	135473	211.6	1.995	0.313693	34.7868	-110.805
1810	1775.26	135633	211.6	2	0.313378	34.7875	-111.397
1811	1776.26	135792	211.7	2.017	0.313061	34.7797	-111.988
1812	1777.26	135951	211.3	1.937	0.312732	34.7639	-112.563
1813	1778.26	136116	210.4	1.807	0.312376	34.7383	-113.009
1814	1779.26	136293	210.9	1.853	0.312022	34.7042	-113.325
1815	1780.26	136466	209	1.597	0.311614	34.6647	-113.61
1816	1781.26	136667	209.8	1.696	0.311223	34.6153	-113.5
1817	1782.26	136856	210	1.738	0.310843	34.5665	-113.595
1818	1783.26	137041	210.4	1.782	0.310466	34.5143	-113.755
1819	1784.26	137222	208.8	1.578	0.31005	34.4583	-113.888
1820	1785.26	137426	209.9	1.697	0.309649	34.3923	-113.76
1821	1786.26	137617	208.9	1.579	0.309226	34.3288	-113.754
1822	1787.26	137822	209	1.591	0.308802	34.2589	-113.57
1823	1788.26	138025	209.2	1.615	0.308383	34.1892	-113.4
1824	1789.26	138226	209.4	1.643	0.307971	34.1196	-113.274
1825	1790.26	138424	209.9	1.707	0.30757	34.0494	-113.212
1826	1791.26	138614	208.3	1.498	0.307122	33.9789	-113.163
1827	1792.26	138831	208.8	1.557	0.306684	33.8988	-112.788
1828	1793.26	139041	209.8	1.685	0.306272	33.8237	-112.541
1829	1794.26	139235	208.8	1.579	0.305846	33.7531	-112.468
1830	1795.26	139442	209.8	1.682	0.305433	33.6766	-112.265
1831	1796.26	139636	208.7	1.562	0.304999	33.6035	-112.171
1832	1797.26	139846	209.1	1.594	0.304567	33.5242	-111.893
1833	1798.26	140052	209.1	1.605	0.304137	33.4472	-111.657
1834	1799.26	140257	209	1.592	0.303705	33.3708	-111.434
1835	1800.26	140464	209.3	1.629	0.303281	33.2941	-111.191
1836	1801.26	140666	208.7	1.541	0.302834	33.219	-110.998
1837	1802.26	140881	208.2	1.49	0.302371	33.141	-110.597
1838	1803.26	141103	208.9	1.574	0.301929	33.0649	-110.12
1839	1804.26	141313	208.7	1.556	0.301486	32.9962	-109.786
1840	1805.26	141526	209.2	1.61	0.301054	32.9295	-109.45
1841	1806.26	141733	208.6	1.544	0.300612	32.8669	-109.185
1842	1807.26	141948	209.2	1.616	0.300181	32.8043	-108.823
1843	1808.26	142154	208.8	1.559	0.299741	32.7468	-108.569
1844	1809.26	142368	209	1.597	0.299309	32.69	-108.217
1845	1810.26	142578	209.8	1.697	0.298903	32.6372	-107.964
1846	1811.26	142775	209.6	1.677	0.298494	32.5876	-107.897
1847	1812.26	142974	209.2	1.617	0.29807	32.5366	-107.771
1848	1813.26	143182	208.9	1.581	0.297635	32.4844	-107.515
1849	1814.26	143394	208.7	1.546	0.297189	32.4339	-107.175
1850	1815.26	143612	208.6	1.528	0.296739	32.3867	-106.761
1851	1816.26	143833	208.4	1.51	0.296285	32.3448	-106.301
1852	1817.26	144056	208.8	1.55	0.295842	32.3096	-105.815
1853	1818.26	144274	208.2	1.482	0.295382	32.2822	-105.402
1854	1819.26	144503	207.9	1.446	0.294915	32.2622	-104.82
1855	1820.26	144737	208.9	1.564	0.294477	32.2531	-104.208
1856	1821.26	144954	208.6	1.534	0.294041	32.2537	-103.842
1857	1822.26	145176	208.9	1.565	0.293613	32.2622	-103.439
1858	1823.26	145394	208.4	1.512	0.293176	32.2782	-103.092
1859	1824.26	145619	208.8	1.572	0.292756	32.3037	-102.668
1860	1825.26	145836	210	1.724	0.29237	32.3364	-102.418
1861	1826.26	146035	209.8	1.708	0.291989	32.3697	-102.432
1862	1827.26	146235	209.5	1.66	0.2916	32.4049	-102.429
1863	1828.26	146442	209.6	1.671	0.291213	32.4437	-102.355
1864	1829.26	146647	210.3	1.775	0.290846	32.4854	-102.331
1865	1830.26	146841	210.3	1.779	0.290483	32.5255	-102.476
1866	1831.26	147034	209.7	1.7	0.290108	32.565	-102.612
1867	1832.26	147237	210	1.731	0.289735	32.607	-102.645
1868	1833.26	147437	209.9	1.719	0.289363	32.6495	-102.717
1869	1834.26	147638	209.9	1.731	0.288996	32.6932	-102.784
1870	1835.26	147838	211.1	1.886	0.288651	32.7372	-102.925
1871	1836.26	148021	209.5	1.664	0.288274	32.7757	-103.197
1872	1837.26	148230	209.3	1.639	0.287885	32.8193	-103.171
1873	1838.26	148442	210	1.722	0.287511	32.8672	-103.109
1874	1839.26	148644	209.7	1.689	0.287138	32.915	-103.176
1875	1840.26	148850	210.3	1.772	0.286778	32.9653	-103.231
1876	1841.26	149047	210	1.742	0.286416	33.0137	-103.406
1877	1842.26	149247	209.7	1.699	0.286047	33.0626	-103.534
1878	1843.26	149453	210.3	1.772	0.285688	33.1135	-103.617
1879	1844.26	149650	209.7	1.692	0.285319	33.1625	-103.791
1880	1845.26	149857	209.3	1.635	0.284936	33.2145	-103.836
1881	1846.26	150072	209.3	1.643	0.284554	33.2715	-103.777
1882	1847.26	150286	210.3	1.772	0.284199	33.332	-103.779
1883	1848.26	150485	210.2	1.773	0.28385	33.389	-103.999
1884	1849.26	150683	210.5	1.811	0.283507	33.4448	-104.242
1885	1850.26	150878	210.3	1.774	0.283159	33.4973	-104.537
1886	1851.26	151077	210	1.738	0.282803	33.549	-104.769
1887	1852.26	151281	210.6	1.824	0.282462	33.6007	-104.963
1888	1853.26	151475	211.4	1.948	0.282142	33.6478	-105.322
1889	1854.26	151657	210.2	1.771	0.281798	33.6869	-105.818
1890	1855.26	151857	209.8	1.709	0.281436	33.7254	-106.046
1891	1856.26	152065	210.4	1.788	0.281086	33.7641	-106.182
1892	1857.26	152264	210	1.739	0.28073	33.7993	-106.453
1893	1858.26	152469	209.7	1.694	0.280363	33.8334	-106.622
1894	1859.26	152679	210.4	1.796	0.280014	33.8677	-106.736
1895	1860.26	152878	210.5	1.809	0.279671	33.898	-107.033
1896	1861.26	153076	209.8	1.71	0.279309	33.9243	-107.327
1897	1862.26	153285	209.9	1.732	0.278948	33.9497	-107.456
1898	1863.26	153492	210.9	1.863	0.278612	33.9731	-107.672
1899	1864.26	153685	210.5	1.818	0.27827	33.9906	-108.055
1900	1865.26	153883	210.6	1.834	0.277929	34.0031	-108.388
1901	1866.26	154079	210.6	1.829	0.277587	34.0101	-108.74
1902	1867.26	154276	210.6	1.827	0.277243	34.0113	-109.078
1903	1868.26	154473	210.8	1.855	0.276902	34.0067	-109.413
1904	1869.26	154668	211	1.9	0.276568	33.9957	-109.798
1905	1870.26	154858	210.7	1.853	0.276225	33.9773	-110.232
1906	1871.26	155054	210.5	1.81	0.275873	33.9506	-110.577
1907	1872.26	155254	210.4	1.805	0.275515	33.9164	-110.85
1908	1873.26	155455	210.2	1.764	0.275149	33.8756	-111.091
1909	1874.26	155661	210.1	1.752	0.274777	33.8279	-111.258
1910	1875.26	155869	210.4	1.784	0.27441	33.7744	-111.4
1911	1876.26	156073	209.7	1.695	0.274023	33.7161	-111.574
1912	1877.26	156288	209.7	1.695	0.273631	33.6498	-111.566
1913	1878.26	156504	208.9	1.585	0.273215	33.5803	-111.508
1914	1879.26	156735	209.8	1.699	0.272817	33.5048	-111.298
1915	1880.26	156951	209.5	1.659	0.272416	33.4327	-111.256
1916	1881.26	157172	209.9	1.717	0.272025	33.356	-111.159
1917	1882.26	157386	209.8	1.701	0.27163	33.2785	-111.164
1918	1883.26	157602	209.5	1.651	0.271223	33.1964	-111.107
1919	1884.26	157826	208.7	1.554	0.270789	33.1092	-110.921
1920	1885.26	158063	208.8	1.561	0.270352	33.0175	-110.525
1921	1886.26	158300	208.9	1.569	0.269917	32.9291	-110.133
1922	1887.26	158537	208.8	1.557	0.26948	32.844	-109.747
1923	1888.26	158775	208.5	1.514	0.269032	32.7616	-109.323
1924	1889.26	159020	208.1	1.474	0.26857	32.6824	-108.769
1925	1890.26	159273	208.1	1.472	0.268108	32.6095	-108.118
1926	1891.26	159526	208.5	1.52	0.26766	32.5467	-107.474
1927	1892.26	159772	208.9	1.574	0.26723	32.4948	-106.961
1928	1893.26	160010	208.1	1.473	0.266778	32.4512	-106.552
1929	1894.26	160265	208.5	1.523	0.266336	32.4136	-105.924
1930	1895.26	160511	208.8	1.565	0.265909	32.3876	-105.441
1931	1896.26	160751	208.8	1.555	0.265484	32.3698	-105.049
1932	1897.26	160994	208.6	1.536	0.265055	32.3599	-104.637
1933	1898.26	161239	208.7	1.541	0.264628	32.3585	-104.191
1934	1899.26	161484	208.4	1.511	0.264197	32.3669	-103.753
1935	1900.26	161735	208.7	1.554	0.263777	32.3866	-103.265
1936	1901.26	161979	209.5	1.655	0.263386	32.4165	-102.908
1937	1902.26	162208	210.5	1.818	0.263032	32.4506	-102.863
1938	1903.26	162418	210.4	1.795	0.26268	32.4816	-103.07
1939	1904.26	162630	210.7	1.844	0.262335	32.5107	-103.286
1940	1905.26	162836	210.1	1.758	0.261978	32.5361	-103.543
1941	1906.26	163053	210.3	1.787	0.261621	32.5603	-103.682
1942	1907.26	163267	210	1.747	0.261259	32.5824	-103.854
1943	1908.26	163487	210.6	1.824	0.260909	32.6036	-103.971
1944	1909.26	163697	210.4	1.799	0.260557	32.6215	-104.213
1945	1910.26	163910	209.8	1.703	0.260186	32.6365	-104.386
1946	1911.26	164136	210.1	1.74	0.259817	32.6514	-104.413
1947	1912.26	164357	209.5	1.662	0.259436	32.6659	-104.471
1948	1913.26	164589	209.1	1.612	0.259041	32.6825	-104.366
1949	1914.26	164828	210.1	1.737	0.258672	32.7038	-104.206
1950	1915.26	165051	210.6	1.821	0.258322	32.7254	-104.304
1951	1916.26	165263	210.5	1.82	0.257975	32.7436	-104.559
1952	1917.26	165476	211.1	1.909	0.257643	32.7578	-104.835
1953	1918.26	165680	210.7	1.854	0.257304	32.7656	-105.248
1954	1919.26	165889	210.4	1.801	0.256952	32.7673	-105.547
1955	1920.26	166105	210.2	1.763	0.256591	32.7643	-105.745
1956	1921.26	166327	209.7	1.695	0.256215	32.758	-105.852
1957	1922.26	166557	209.7	1.686	0.255833	32.7503	-105.829
1958	1923.26	166789	209.7	1.683	0.255451	32.7429	-105.778
1959	1924.26	167021	209.5	1.656	0.255063	32.7362	-105.712
1960	1925.26	167258	209.5	1.656	0.254674	32.731	-105.594
1961	1926.26	167495	209.2	1.622	0.254279	32.7281	-105.463
1962	1927.26	167738	209.4	1.637	0.253886	32.7285	-105.272
1963	1928.26	167978	209.2	1.612	0.25349	32.7328	-105.105
1964	1929.26	168223	209.2	1.625	0.253096	32.7418	-104.889
1965	1930.26	168466	209.7	1.689	0.252717	32.7556	-104.715
1966	1931.26	168700	209.1	1.613	0.252328	32.7718	-104.668
1967	1932.26	168946	210.2	1.751	0.251962	32.7923	-104.521
1968	1933.26	169173	209.6	1.681	0.251589	32.8127	-104.621
1969	1934.26	169409	210.5	1.812	0.251239	32.8342	-104.636
1970	1935.26	169629	210.1	1.75	0.250883	32.8529	-104.854
1971	1936.26	169857	210	1.727	0.25052	32.8697	-104.984
1972	1937.26	170088	209.7	1.695	0.250151	32.8856	-105.052
1973	1938.26	170324	209.6	1.676	0.249776	32.902	-105.052
1974	1939.26	170563	210.7	1.837	0.24943	32.9201	-105.044
1975	1940.26	170781	210.2	1.77	0.249079	32.9342	-105.353
1976	1941.26	171008	210.6	1.834	0.248736	32.9448	-105.553
1977	1942.26	171227	210.5	1.821	0.248393	32.9507	-105.844
1978	1943.26	171448	210.5	1.822	0.248048	32.9514	-106.119
1979	1944.26	171669	211.3	1.94	0.247721	32.9465	-106.413
1980	1945.26	171877	211.4	1.951	0.2474	32.934	-106.916
1981	1946.26	172084	210.9	1.886	0.247066	32.9116	-107.403
1982	1947.26	172299	210.4	1.8	0.246713	32.8791	-107.749
1983	1948.26	172524	210	1.736	0.246344	32.8377	-107.93
1984	1949.26	172758	210.5	1.817	0.245984	32.7899	-107.997
1985	1950.26	172982	210.3	1.779	0.24562	32.7386	-108.195
1986	1951.26	173211	211	1.878	0.245269	32.6799	-108.348
1987	1952.26	173428	209.7	1.7	0.24489	32.6168	-108.587
1988	1953.26	173668	210.4	1.789	0.244516	32.5412	-108.534
[truncated: 1,040 more rows]
